# Supplementary material for: Uncovering obsessive-compulsive disorder risk genes in a pediatric cohort by high-resolution analysis of copy number variation
Source: J Neurodev Disord. 2016 Oct 18;8:36. doi: 10.1186/s11689-016-9170-9 (PMC5070001; doi:10.1186/s11689-016-9170-9)
Supplement: Additional file 3: — Table S2 (XLSX 11 kb) [file 11689_2016_9170_MOESM3_ESM.xlsx]

## Sheet: Gene-set information
Gene-set ID	Gene-set name
PhMm_NeuroBehav_all	Mouse phenotype, abnormal behavior or neurological (MGI)
PhMm_NervSystem_all	Mouse phenotype, abnormal nervous system phenotype (MGI)
PhMm_Aggr_SkeCranioLimbs_all	Mouse phenotype, abnormal skeleton or cranium or limbs (MGI)
PhMm_Aggr_Sensory_all	Mouse phenotype, abnormal sensory system (MGI)
PhMm_Aggr_CardvascMuscle_all	Mouse phenotype, abnormal muscle or cardiovascular (MGI)
PhMm_Aggr_HematoImmune_all	Mouse phenotype, abnormal immune system or hematological (MGI)
PhMm_Aggr_DigestHepato_all	Mouse phenotype, abnormal hepatic or digestive system (MGI)
PhMm_Aggr_EndoExocrRepr_all	Mouse phenotype, abnormal endo/exocrine or reproductive system (MGI)
PhMm_Aggr_IntegAdipPigm_all	Mouse phenotype, abnormal integument or adipose or pigmentation (MGI)
PhMm_NeuroUnion_all	Mouse phenotype, abnormal integument or adipose or pigmentation (MGI)
PhMm_CompleteLethality	Mouse phenotype, pre-natal and peri-natal lethal (MGI)
PhHs_NervSys_ADX	Human phenotype, nervous system abnormality, autosomal dominant or X-linked (HPO)
PhHs_NervSys_All	Human phenotype, nervous system abnormality (HPO)
PhHs_MindFun_ADX	Human phenotype, higher mental function abnormality, autosomal dominant or X-linked (HPO)
PhHs_MindFun_All	Human phenotype, higher mental function abnormality (HPO)
PSD_BayesGrant_fullset	Human neural selected components, post-synaptic density (Bayes 2011)
FMR1_Targets_Darnell	Mouse neural selected components, FMR1 targets (Darnell 2011)
FMR1_Targets_Ascano	Human neural selected components, FMR1 targets (Ascano 2012)
Kirov_ARC	Human neural selected components, ARC complex (Kirov 2012)
Kirov_NMDAR	Human neural selected components, NMDAR complex (Kirov 2012)
SynKEGG_Cholinergic	Human neural function or pathway, cholinergic synapse (KEGG)
SynKEGG_Glutamatergic	Human neural function or pathway, Glutamatergic synapse (KEGG)
SynKEGG_Dopaminergic	Human neural function or pathway, Dopaminergic synapse (KEGG)
SynKEGG_GABAergic	Human neural function or pathway, GABAergic synapse (KEGG)
SynKEGG_Serotonergic	Human neural function or pathway, serotonergic synapse (KEGG)
Neurof_KeggSynaptic	Human neural function or pathway, synaptic pathways (KEGG)
Neurof_GoSynaptic	Human neural function or pathway, synaptic components (GO)
Neurof_GoNervTransm	Human neural function or pathway, nervous signal transmission (GO)
Neurof_GoNeuronProj	Human neural function or pathway, neuron projection (GO)
Neurof_GoNeuronBody	Human neural function or pathway, neuron body (GO)
Neurof_GoNervSysDev	Human neural function or pathway, nervous system development (GO)
Neurof_GoNervSysDev_CNS	Human neural function or pathway, nervous system development (GO)_CNS
Neurof_PathwaysAxonG	Human neural function or pathway, axon guidance pathways (KEGG,NCI, Reactome)
Neurof_UnionInclusive	Human neural function or pathway, union, inclusive (GO, KEGG,NCI, Reactome)
Neurof_UnionStringent	Human neural function or pathway, union, stringent (GO, KEGG,NCI, Reactome)
GOP_lessthan500g	Human phenotype,GO terms with less than 500 genes (GO)
BSpan_VH_thr4.74	Human brain expression, very high to high level (BrainSpan)
BSpan_HM_thr3.21	Human brain expression, high to medium level (BrainSpan)
BSpanML_lg2rpkm0.93	Human brain expression, medium to low level (BrainSpan)
BspanLA_lg2rpkm.MIN	Human brain expression, low level to absent (BrainSpan)
BspanVHM_PreNat	Human brain expression, pre-natal (BrainSpan)
BspanVHM_EqlNat	Human brain expression, balanced pre- and post-natal (BrainSpan)
BspanVHM_PstNat	Human brain expression, post-natal (BrainSpan)
HI_q4	Human predicted haploinsufficiency, high to very high (Huang 2010)
HI_q3	Human predicted haploinsufficiency, high to medium (Huang 2010)
HI_q2	Human predicted haploinsufficiency, medium to low (Huang 2010)
HI_q1	Human predicted haploinsufficiency, low to very low (Huang 2010)
GI_q4	Human predicted genic intolerance to missense variation, high to very high (Petrovski 2013)
GI_q3	Human predicted genic intolerance to missense variation, high to medium (Petrovski 2013)
GI_q2	Human predicted haploinsufficiency, medium to low (Huang 2010)
GI_q1	Human predicted genic intolerance to missense variation, low to very low (Petrovski 2013)

## Sheet: Notes
Bayes 2011 = Bayés A, van de Lagemaat LN, Collins MO, Croning MD, Whittle IR, Choudhary JS, Grant SG. 2011. Characterization of the proteome, diseases and evolution of the human postsynaptic density. Nat Neurosci. 14(1):19-21
Darnell 2011 = Darnell JC, Van Driesche SJ, Zhang C, Hung KY, Mele A, Fraser CE, Stone EF, Chen C, Fak JJ, Chi SW, Licatalosi DD, Richter JD, Darnell RB. 2011. FMRP stalls ribosomal translocation on mRNAs linked to synaptic function and autism. . Cell. 146(2):247-61
Ascano 2012 = Ascano M Jr, Mukherjee N, Bandaru P, Miller JB, Nusbaum JD, Corcoran DL, Langlois C, Munschauer M, Dewell S, Hafner M, Williams Z, Ohler U, Tuschl T. 2012. FMRP targets distinct mRNA sequence elements to regulate protein expression. Nature. 492(7429):382-6
Kirov 2012 = Kirov G, Pocklington AJ, Holmans P, Ivanov D, Ikeda M, Ruderfer D, Moran J, Chambert K, Toncheva D, Georgieva L, Grozeva D, Fjodorova M, Wollerton R, Rees E, Nikolov I, van de Lagemaat LN, Bayés A, Fernandez E, Olason PI, Böttcher Y, Komiyama NH, Collins MO, Choudhary J, Stefansson K, Stefansson H, Grant SG, Purcell S, Sklar P, O'Donovan MC, Owen MJ. 2012. De novo CNV analysis implic…
Huang 2010 = Huang N, Lee I, Marcotte EM, Hurles ME. 2010. Characterising and predicting haploinsufficiency in the human genome. PLoS Genet. 6(10):e1001154
Petrovski 2013 = Petrovski S, Wang Q, Heinzen EL, Allen AS, Goldstein DB. 2013. Genic intolerance to functional variation and the interpretation of personal genomes. PLoS Genet. 9(8):e1003709
