# Supplementary material for: Uncovering obsessive-compulsive disorder risk genes in a pediatric cohort by high-resolution analysis of copy number variation
Source: J Neurodev Disord. 2016 Oct 18;8:36. doi: 10.1186/s11689-016-9170-9 (PMC5070001; doi:10.1186/s11689-016-9170-9)
Supplement: Additional file 4: — Table S5 (XLSX 1313 kb) [file 11689_2016_9170_MOESM4_ESM.xlsx]

## Sheet: Gene-set enrichment statistics
GsID	Coeff	Pvalue_glm	Pvalue_dev	Pvalue_dev_s	Coeff_U	Pvalue_U_glm	Pvalue_U_dev	Pvalue_U_dev_s	Coeff_TL	Pvalue_TL_glm	Pvalue_TL_dev	Pvalue_TL_dev_s	Coeff_CNML	Pvalue_CNML_glm	Pvalue_CNML_dev	Pvalue_CNML_dev_s	OCD_g1n	CT_g1n	OCD_g2n	CT_g2n	OCD_g3n	CT_g3n	OCD_g4n	CT_g4n	OCD_g5n	CT_g5n	OCD_max.500k	OCD_500.100k	OCD_100.mink	CT_max.500k	CT_500.100k	CT_100.mink	OCD_F	CT_F	OCD_M	CT_M	OCD_OMNI	CT_OMNI	OCD_Cyto	CT_Cyto	OCD_gTT	CT_gTT	FDR_BH_U	FDR_BH_TL	KL	TYPE	Map.Type	SIZE
PhMm_Aggr_EndoExocrRepr_all__LOSS	0.153436	0.319603	0.361333	0.442092	0.486082	0.0589761	0.0672633	1.17222	0.37524	0.10724	0.119794	0.921565	0.350094	0.131536	0.145721	0.836479	7.6	5.31232	1.2	0.40864	0.4	0.0583771	0	0.0583771	0	0.0583771	0.4	2	5.2	0.233508	1.16754	3.91127	8.82353	6.5051	6.14035	4.30571	6.66667	4.31499	7.89474	6.48855	250	1713	0.820299	0.902319	KLy	LOSS	CDS	min10k.min00pr
Neurof_GoNervTransm__LOSS	0.283854	0.286286	0.327609	0.484645	0.632136	0.091654	0.108898	0.962978	0.566588	0.118148	0.137678	0.861136	0.542797	0.137325	0.157031	0.804013	3.6	1.98482	0.4	0.116754	0	0.0583771	0	0.0583771	0	0.0583771	0.4	1.2	2	0.175131	0.700525	1.10917	5.14706	1.91327	1.75439	2.04521	3.33333	1.51025	3.68421	2.54453	250	1713	0.820299	0.902319	KLy	LOSS	CDS	min10k.min00pr
PhMm_NeuroUnion_all__LOSS	0.0716119	0.535154	0.566309	0.246947	0.312263	0.135373	0.142258	0.846924	0.215142	0.235445	0.248235	0.605136	0.191048	0.304045	0.315566	0.50091	12.4	8.9317	0.8	1.10917	0.4	0.175131	0	0.116754	0	0.0583771	0.4	3.2	8.8	0.525394	2.33508	6.07122	15.4412	8.29082	8.77193	9.47255	13.3333	7.65912	12.1053	10.4326	250	1713	0.820299	0.902319	KLy	LOSS	CDS	min10k.min00pr
Neurof_KeggSynaptic__LOSS	0.377714	0.384142	0.427126	0.369444	0.852823	0.160619	0.187524	0.726943	0.794326	0.181099	0.210551	0.676643	0.764251	0.208186	0.235428	0.628141	1.6	0.875657	0	0.0583771	0	0.0583771	0	0.0583771	0	0	0	0	1.6	0.175131	0.116754	0.583771	1.47059	0.892857	1.75439	0.861141	0	1.18662	2.10526	0.508906	250	1713	0.820299	0.902319	KLy	LOSS	CDS	min10k.min00pr
Kirov_ARC__LOSS	2.08306	0.176684	0.19747	0.704498	2.10764	0.173329	0.193869	0.712493	2.09674	0.173096	0.194291	0.711547	2.03509	0.188988	0.208654	0.680574	0.4	0.0583771	0	0	0	0	0	0	0	0	0	0	0.4	0	0	0.0583771	0.735294	0	0	0.107643	0	0.107875	0.526316	0	250	1713	0.820299	0.902319	KLy	LOSS	CDS	min10k.min00pr
FMR1_Targets_Darnell__LOSS	0.307558	0.361857	0.388764	0.410314	0.5206	0.187785	0.207664	0.68264	0.380747	0.268854	0.300194	0.522598	0.401086	0.267348	0.295448	0.529519	3.6	2.10158	0	0.175131	0	0.0583771	0	0.0583771	0	0	0	0.8	2.8	0.291886	0.583771	1.22592	4.41176	2.42347	2.63158	1.82992	3.33333	1.726	3.68421	2.54453	250	1713	0.820299	0.902319	KLy	LOSS	CDS	min10k.min00pr
HI_q2__LOSS	0.0147544	0.887778	0.890728	0.0502551	0.253121	0.238964	0.243442	0.613605	0.10807	0.487407	0.497988	0.302781	0.0887642	0.585203	0.591176	0.228283	14.8	11.9673	1.2	1.80969	0.4	0.350263	0.4	0.175131	0	0.116754	0.4	2.4	12	0.642148	3.21074	8.11442	16.9118	13.7755	12.2807	10.4413	13.3333	10.4639	15.2632	13.7405	250	1713	0.820299	0.902319	KLy	LOSS	CDS	min10k.min00pr
Neurof_UnionInclusive__LOSS	0.045034	0.721698	0.737785	0.13207	0.273895	0.242218	0.249867	0.602292	0.178498	0.372918	0.387797	0.411396	0.157134	0.451484	0.462341	0.335038	10	7.53065	0.8	0.700525	0	0.291886	0	0.116754	0	0.116754	0.4	2.8	6.8	0.350263	1.75131	5.42907	11.7647	8.03571	7.89474	7.10441	10	6.25674	10	9.03308	250	1713	0.820299	0.902319	KLy	LOSS	CDS	min10k.min00pr
PhMm_NeuroBehav_all__LOSS	0.0826026	0.609829	0.630884	0.20005	0.275138	0.262826	0.272794	0.564164	0.213606	0.348947	0.360543	0.443043	0.194709	0.401871	0.411431	0.385703	9.2	6.36311	0	0.467017	0	0.116754	0	0.0583771	0	0.0583771	0.4	2	6.8	0.467017	1.40105	4.49504	11.0294	5.61224	7.01754	6.99677	6.66667	5.50162	10	7.37913	250	1713	0.820299	0.902319	KLy	LOSS	CDS	min10k.min00pr
BspanVHM_PreNat__LOSS	0.035276	0.816176	0.823029	0.0845848	0.250566	0.323762	0.334589	0.475488	0.149153	0.476457	0.493758	0.306486	0.152798	0.486921	0.501523	0.299709	6.8	5.6042	1.2	0.700525	0	0.175131	0	0.175131	0	0.116754	0	2.4	4.4	0.40864	1.40105	3.79451	5.88235	6.37755	7.89474	4.95156	8.33333	5.17799	6.31579	6.10687	250	1713	0.820299	0.902319	KLy	LOSS	CDS	min10k.min00pr
PhMm_Aggr_IntegAdipPigm_all__LOSS	0.0954419	0.612211	0.631554	0.19959	0.257842	0.327413	0.338397	0.470574	0.214926	0.392633	0.404868	0.392686	0.181773	0.476892	0.485744	0.313592	7.2	5.02043	0	0.467017	0	0.0583771	0	0.0583771	0	0.0583771	0	0.8	6.4	0.233508	1.05079	3.73614	9.55882	4.71939	4.38596	5.27449	8.33333	4.63862	6.84211	5.47074	250	1713	0.820299	0.902319	KLy	LOSS	CDS	min10k.min00pr
SynKEGG_Glutamatergic__LOSS	0.553313	0.563865	0.597628	0.223569	1.30887	0.297449	0.34035	0.468074	1.21351	0.319962	0.365751	0.436815	1.37407	0.286492	0.329793	0.481758	0.4	0.233508	0	0.0583771	0	0	0	0	0	0	0	0	0.4	0.116754	0.0583771	0.0583771	0.735294	0.255102	0	0.215285	0	0.431499	0.526316	0	250	1713	0.820299	0.902319	KLy	LOSS	CDS	min10k.min00pr
BspanVHM_PstNat__LOSS	0.0234879	0.856785	0.861174	0.0649091	0.19503	0.362132	0.373724	0.427449	0.103031	0.553627	0.568884	0.244976	0.0777466	0.679474	0.686248	0.163519	8.8	6.94688	1.6	1.22592	0	0.291886	0	0.175131	0	0.175131	0.4	2	6.4	0.350263	1.69294	4.90368	8.82353	7.78061	8.77193	6.24327	10	5.60949	8.42105	8.52417	250	1713	0.820299	0.902319	KLy	LOSS	CDS	min10k.min00pr
BspanHM_lg2rpkm3.21__LOSS	0.00873361	0.929447	0.930744	0.0311695	0.155517	0.380923	0.386262	0.413118	0.0880489	0.552935	0.559819	0.251953	0.0627855	0.679395	0.682763	0.16573	12.8	11.617	3.6	1.98482	0.4	0.525394	0	0.233508	0	0.116754	0	3.2	9.6	0.758903	2.68535	8.1728	11.0294	12.3724	14.9123	10.9795	11.6667	10.0324	13.1579	13.486	250	1713	0.820299	0.902319	KLy	LOSS	CDS	min10k.min00pr
HI_q3__LOSS	0.00193069	0.985566	0.985623	0.00628935	0.161662	0.409381	0.413074	0.383972	0.0827414	0.593448	0.601546	0.220731	0.0771529	0.632424	0.638083	0.195123	11.6	11.5587	2.8	1.69294	0.4	0.233508	0.4	0.116754	0.4	0.116754	0.4	3.2	8	0.875657	2.97723	7.70578	11.7647	12.1173	11.4035	11.0872	10	10.2481	12.1053	13.1043	250	1713	0.820299	0.902319	KLy	LOSS	CDS	min10k.min00pr
PhMm_NervSystem_all__LOSS	0.0209407	0.89173	0.894314	0.0485098	0.18467	0.446746	0.453372	0.343546	0.122548	0.575512	0.582001	0.235076	0.0920835	0.680674	0.684034	0.164922	8	6.53824	0.8	0.81728	0.4	0.116754	0	0.0583771	0	0.0583771	0.4	2.4	5.2	0.40864	2.10158	4.02802	8.82353	6.7602	7.01754	6.35091	6.66667	5.17799	8.42105	8.14249	250	1713	0.820299	0.902319	KLy	LOSS	CDS	min10k.min00pr
PhMm_CompleteLethality__LOSS	0.245027	0.595148	0.607291	0.216604	0.378028	0.440752	0.458644	0.338525	0.310759	0.51191	0.527686	0.277624	0.260756	0.588301	0.599211	0.22242	2	1.45943	0	0.175131	0	0	0	0	0	0	0	0	2	0.116754	0.233508	1.10917	2.20588	1.27551	1.75439	1.61464	5	1.2945	1.05263	1.65394	250	1713	0.820299	0.902319	KLy	LOSS	CDS	min10k.min00pr
Neurof_GoNeuronBody__LOSS	0.469027	0.56356	0.580425	0.236254	0.65152	0.441226	0.464266	0.333233	0.554955	0.501251	0.521734	0.282551	0.47929	0.563476	0.579032	0.237298	0.8	0.525394	0	0	0	0	0	0	0	0	0	0	0.8	0.116754	0.0583771	0.350263	0.735294	0.637755	0.877193	0.430571	1.66667	0.539374	0.526316	0.508906	250	1713	0.820299	0.902319	KLy	LOSS	CDS	min10k.min00pr
Neurof_GoNeuronProj__LOSS	0.0402338	0.866764	0.870666	0.0601483	0.264577	0.464075	0.474838	0.323455	0.185027	0.575924	0.586685	0.231595	0.136851	0.686613	0.692035	0.159872	4	2.86048	0	0.291886	0	0.175131	0	0.0583771	0	0.0583771	0.4	1.2	2.4	0.233508	0.40864	2.21833	4.41176	2.93367	3.50877	2.79871	5	2.37325	3.68421	3.43511	250	1713	0.820299	0.902319	KLy	LOSS	CDS	min10k.min00pr
GI_q1__LOSS	0.00148436	0.98806	0.98807	0.00521226	0.104062	0.480563	0.482529	0.316477	0.0331325	0.760349	0.762916	0.117523	0.023455	0.829884	0.831349	0.0802166	17.6	16.5791	2.8	3.3275	0.8	0.875657	0.4	0.583771	0.4	0.233508	1.2	1.6	14.8	0.934034	3.26912	12.3759	19.8529	18.6224	14.9123	14.8547	10	15.7497	20	17.5573	250	1713	0.820299	0.981896	KLy	LOSS	CDS	min10k.min00pr
Neurof_GoSynaptic__LOSS	0.0982813	0.802337	0.806674	0.093302	0.250427	0.582197	0.592113	0.227595	0.190817	0.660164	0.668817	0.174692	0.165085	0.712982	0.718617	0.143502	2.4	1.57618	0	0.233508	0	0.116754	0	0.0583771	0	0	0	0.8	1.6	0.175131	0.175131	1.22592	2.94118	1.53061	1.75439	1.61464	1.66667	1.07875	2.63158	2.16285	250	1713	0.827037	0.947491	KLy	LOSS	CDS	min10k.min00pr
PhMm_Aggr_HematoImmune_all__LOSS	-0.0015777	0.992686	0.992673	-0.00319385	0.136403	0.595738	0.600007	0.221844	0.0815696	0.729424	0.732444	0.135226	0.0557649	0.816612	0.817795	0.0873556	7.6	6.53824	0.8	0.40864	0	0.116754	0	0.0583771	0	0.0583771	0	0.4	7.2	0.291886	1.69294	4.55342	8.08824	7.01531	7.01754	6.13563	3.33333	5.39374	8.94737	7.88804	250	1713	0.827037	0.981896	KLy	LOSS	CDS	min10k.min00pr
PhHs_NervSys_All__LOSS	-0.0060669	0.979786	0.979766	-0.00887785	0.0867638	0.749516	0.751297	0.124188	0.044334	0.861105	0.861763	0.0646122	0.0176803	0.944903	0.945005	0.024566	7.2	6.42148	0.4	0.467017	0	0.0583771	0	0.0583771	0	0.0583771	0.4	0.8	6	0.291886	1.86807	4.26153	7.35294	6.5051	7.01754	6.35091	5	5.39374	7.89474	7.63359	250	1713	0.949891	0.981896	KLy	LOSS	CDS	min10k.min00pr
BspanLA_lg2rpkm.MIN__LOSS	-0.0246646	0.791006	0.786307	-0.104408	0.042889	0.75201	0.753217	0.12308	0.0105169	0.921728	0.922031	0.0352543	-0.00366424	0.97238	0.972341	-0.0121814	19.2	15.8202	3.2	3.91127	1.2	1.2843	0.4	0.81728	0	0.583771	0.8	3.2	15.2	0.875657	3.79451	11.15	18.3824	16.4541	20.1754	15.2853	15	14.4552	20.5263	17.43	250	1713	0.949891	0.981896	KLy	LOSS	CDS	min10k.min00pr
SynKEGG_Serotonergic__LOSS	0.169402	0.875668	0.878159	0.0564269	0.342788	0.75627	0.765146	0.116256	0.27757	0.799843	0.806037	0.0936451	0.319645	0.773153	0.780782	0.10747	0.4	0.525394	0	0	0	0	0	0	0	0	0	0	0.4	0.116754	0.0583771	0.350263	0	0.510204	0.877193	0.538213	0	0.862999	0.526316	0.127226	250	1713	0.949891	0.981896	KLy	LOSS	CDS	min10k.min00pr
Neurof_GoNervSysDev__LOSS	-0.0411387	0.8655	0.861124	-0.0649343	0.0787111	0.806338	0.807761	0.0927169	0.0345144	0.908362	0.908824	0.0415201	-0.0193067	0.949597	0.949481	-0.0225138	4.8	4.8453	0.4	0.291886	0	0.175131	0	0.0583771	0	0.0583771	0.4	1.6	2.8	0.291886	0.934034	3.61938	4.41176	4.71939	5.26316	4.95156	1.66667	4.53074	5.78947	5.21628	250	1713	0.949891	0.981896	KLy	LOSS	CDS	min10k.min00pr
FMR1_Targets_Ascano__LOSS	-0.0396299	0.916556	0.915763	-0.0382171	0.0903445	0.835005	0.836446	0.0775619	0.0540701	0.89739	0.897998	0.0467245	0.0488287	0.907108	0.907602	0.0421045	2.4	2.91886	0.4	0.0583771	0	0.0583771	0	0.0583771	0	0.0583771	0	0	2.4	0.350263	0.700525	1.86807	2.20588	3.06122	2.63158	2.79871	1.66667	3.12837	2.63158	2.67176	250	1713	0.949891	0.981896	KLy	LOSS	CDS	min10k.min00pr
GOP_lessthan500g__LOSS	-0.0305258	0.611071	0.556726	-0.254359	0.0372872	0.838493	0.838139	0.0766838	-0.0135979	0.845845	0.844577	-0.0733606	-0.029992	0.683238	0.678779	-0.168272	33.6	32.8663	10.4	11.3252	4.4	4.0864	1.6	1.86807	0.4	1.45943	1.2	6.8	25.6	1.22592	7.88091	23.7595	35.2941	36.7347	31.5789	29.6017	30	29.8813	34.7368	36.3868	250	1713	0.949891	0.981896	KLy	LOSS	CDS	min10k.min00pr
Neurof_UnionStringent__LOSS	-0.0710319	0.815107	0.804653	-0.0943915	0.0602148	0.879493	0.880324	0.0553572	0.00847552	0.981872	0.981896	0.00793432	-0.0537366	0.888028	0.887213	-0.0519722	3.2	2.97723	0	0.291886	0	0.175131	0	0.0583771	0	0.0583771	0.4	1.2	1.6	0.233508	0.467017	2.27671	3.67647	2.80612	2.63158	3.12164	3.33333	2.69687	3.15789	3.30789	250	1713	0.974832	0.981896	KLy	LOSS	CDS	min10k.min00pr
PSD_BayesGrant_fullset__LOSS	-0.0500418	0.841594	0.838992	-0.0762422	0.0328612	0.90905	0.909446	0.0412229	-0.0105106	0.968736	0.968676	-0.0138216	-0.0506386	0.852738	0.851392	-0.0698703	5.2	3.91127	0	0.583771	0	0.291886	0	0.175131	0	0.0583771	0	0.8	4.4	0.175131	0.758903	2.97723	4.41176	3.95408	6.14035	3.87513	3.33333	3.0205	5.78947	4.96183	250	1713	0.974832	0.981896	KLy	LOSS	CDS	min10k.min00pr
BspanVH_lg2rpkm4.74__LOSS	-0.0526253	0.733011	0.701287	-0.154104	0.0187094	0.927251	0.927986	0.0324585	-0.0190743	0.913628	0.912	-0.0400052	-0.0431354	0.82617	0.821616	-0.0853311	7.6	6.77175	0.8	1.05079	0	0.350263	0	0.291886	0	0.175131	0.4	2.4	4.8	0.525394	1.86807	4.37828	7.35294	8.29082	7.89474	5.48977	8.33333	6.36462	7.36842	7.25191	250	1713	0.974832	0.981896	KLy	LOSS	CDS	min10k.min00pr
PhHs_MindFun_All__LOSS	-0.0712963	0.857757	0.856396	-0.0673256	0.00321968	0.993777	0.99378	0.00270988	-0.0245464	0.951508	0.951359	-0.0216555	-0.0605624	0.880998	0.880104	-0.0554658	2.8	2.74372	0	0.233508	0	0	0	0	0	0	0.4	0.4	2	0.116754	0.525394	2.10158	1.47059	2.42347	4.38596	3.01399	0	2.589	3.68421	2.92621	250	1713	0.99378	0.981896	KLy	LOSS	CDS	min10k.min00pr
PhMm_Aggr_DigestHepato_all__LOSS	-0.0766701	0.746052	0.734286	-0.134135	-0.0102114	0.970747	0.970715	-0.0129082	-0.0386516	0.88516	0.884537	-0.0532838	-0.06482	0.810298	0.808666	-0.0922307	5.2	5.6042	0.8	0.350263	0	0.116754	0	0.0583771	0	0.0583771	0	0.4	4.8	0.350263	0.934034	4.31991	5.14706	6.12245	5.26316	5.16685	6.66667	5.07012	4.73684	6.2341	250	1713	0.99013	0.981896	KLy	LOSS	CDS	min10k.min00pr
SynKEGG_GABAergic__LOSS	-10.0054	0.975421	0.699776	-0.155041	-6.86343	0.983141	0.936603	-0.0284442	-5.8526	0.985624	0.961253	-0.0171623	-3.32185	0.991839	0.989113	-0.00475399	0	0.0583771	0	0	0	0	0	0	0	0	0	0	0	0.0583771	0	0	0	0.127551	0	0	0	0.107875	0	0	250	1713	0.974832	0.981896	KLy	LOSS	CDS	min10k.min00pr
GI_q2__LOSS	-0.102614	0.579598	0.528303	-0.277117	-0.0558934	0.810306	0.809346	-0.0918657	-0.0727304	0.718645	0.715781	-0.14522	-0.0878195	0.668252	0.664791	-0.177315	7.6	10.0992	2.8	1.16754	0.4	0.116754	0	0.116754	0	0.0583771	0.4	1.2	6	0.642148	3.3275	6.1296	8.82353	11.6071	6.14035	8.8267	6.66667	9.06149	7.89474	11.3232	250	1713	0.949891	0.981896	KLy	LOSS	CDS	min10k.min00pr
GI_q3__LOSS	-0.10648	0.542471	0.489596	-0.310162	-0.0716439	0.732593	0.730147	-0.136589	-0.0853237	0.644376	0.636283	-0.19635	-0.104513	0.585008	0.576795	-0.238978	8	9.45709	2.4	1.63456	0	0.350263	0	0.116754	0	0.116754	0	2	6	0.525394	2.27671	6.65499	8.82353	10.3316	7.01754	8.71905	13.3333	9.06149	6.31579	9.92366	250	1713	0.949891	0.927156	KLy	LOSS	CDS	min10k.min00pr
Neurof_GoNervSysDev_CNS__LOSS	-0.296794	0.492746	0.474297	-0.323949	-0.235197	0.604324	0.595184	-0.225349	-0.256737	0.561893	0.54982	-0.259779	-0.312115	0.482785	0.466783	-0.330885	2.4	2.97723	0	0.116754	0	0.0583771	0	0	0	0	0	0.4	2	0.175131	0.700525	2.10158	2.94118	3.06122	1.75439	2.90635	1.66667	2.69687	2.63158	3.30789	250	1713	0.827037	0.902319	KLy	LOSS	CDS	min10k.min00pr
HI_q1__LOSS	-0.116885	0.396701	0.370583	-0.431115	-0.10498	0.555388	0.552462	-0.257697	-0.0968396	0.503915	0.492788	-0.30734	-0.1148	0.430483	0.41583	-0.381085	12	13.2516	2	3.26912	0.4	0.992411	0.4	0.40864	0.4	0.175131	0.8	2	9.2	0.525394	2.86048	9.86573	12.5	13.7755	11.4035	12.8095	10	13.2686	12.6316	13.2316	250	1713	0.827037	0.902319	KLy	LOSS	CDS	min10k.min00pr
SynKEGG_Dopaminergic__LOSS	-11.246	0.975537	0.457264	-0.339833	-11.0807	0.974588	0.533723	-0.272684	-11.0657	0.974091	0.530436	-0.275367	-10.9907	0.972082	0.51525	-0.287982	0	0.233508	0	0.0583771	0	0	0	0	0	0	0	0	0	0.0583771	0.0583771	0.116754	0	0.382653	0	0.107643	0	0.431499	0	0	250	1713	0.824845	0.902319	KLy	LOSS	CDS	min10k.min00pr
PhMm_Aggr_CardvascMuscle_all__LOSS	-0.195885	0.412303	0.375426	-0.425475	-0.165729	0.53049	0.524326	-0.280398	-0.174226	0.481084	0.471659	-0.326372	-0.207473	0.407788	0.396469	-0.40179	7.2	7.12201	0.4	0.642148	0	0.0583771	0	0.0583771	0	0.0583771	0.4	0.8	6	0.467017	1.75131	4.90368	8.82353	7.52551	5.26316	6.78149	3.33333	5.17799	8.42105	9.41476	250	1713	0.824845	0.902319	KLy	LOSS	CDS	min10k.min00pr
BspanVHM_EqlNat__LOSS	-0.204297	0.413254	0.362896	-0.440217	-0.177278	0.526938	0.519415	-0.284485	-0.177556	0.489529	0.477999	-0.320573	-0.218417	0.402145	0.388791	-0.410284	6.8	7.18039	0	0.758903	0	0.175131	0	0.116754	0	0.0583771	0	1.2	5.6	0.525394	1.69294	4.96205	6.61765	7.39796	7.01754	6.99677	3.33333	6.36462	7.89474	8.14249	250	1713	0.824845	0.902319	KLy	LOSS	CDS	min10k.min00pr
GI_q4__LOSS	-0.192361	0.299354	0.259882	-0.585224	-0.185862	0.37548	0.367016	-0.435315	-0.175878	0.35371	0.339154	-0.469603	-0.223691	0.249549	0.232902	-0.632828	10.8	12.3176	1.2	1.80969	0	0.233508	0	0.175131	0	0.175131	0.4	2.4	8	0.583771	3.38587	8.34793	11.7647	12.7551	9.64912	11.9483	10	11.219	11.0526	13.6132	250	1713	0.820299	0.902319	KLy	LOSS	CDS	min10k.min00pr
SynKEGG_Cholinergic__LOSS	-11.8077	0.969147	0.289305	-0.538644	-12.6074	0.979142	0.351167	-0.454487	-12.6225	0.978801	0.340163	-0.468313	-12.3217	0.978038	0.383828	-0.415863	0	0.350263	0	0.0583771	0	0	0	0	0	0	0	0	0	0.175131	0.116754	0.0583771	0	0.382653	0	0.322928	0	0.539374	0	0.127226	250	1713	0.820299	0.902319	KLy	LOSS	CDS	min10k.min00pr
PhHs_NervSys_ADX__LOSS	-0.603076	0.313967	0.27131	-0.566534	-0.543214	0.37804	0.34387	-0.463606	-0.563739	0.348253	0.309036	-0.50999	-0.596948	0.323183	0.282648	-0.548755	1.2	1.80969	0	0.116754	0	0	0	0	0	0	0.4	0	0.8	0.175131	0.350263	1.2843	0.735294	1.40306	1.75439	2.15285	0	1.18662	1.57895	2.54453	250	1713	0.820299	0.902319	KLy	LOSS	CDS	min10k.min00pr
PhMm_Aggr_Sensory_all__LOSS	-0.355277	0.274709	0.240792	-0.618358	-0.329813	0.345168	0.327811	-0.484376	-0.332948	0.314974	0.293238	-0.53278	-0.377718	0.258895	0.235468	-0.628069	4	4.96205	0	0.350263	0	0.0583771	0	0.0583771	0	0.0583771	0.4	0.4	3.2	0.175131	1.2843	3.50263	5.14706	5.22959	2.63158	4.73628	3.33333	4.31499	4.21053	5.72519	250	1713	0.820299	0.902319	KLy	LOSS	CDS	min10k.min00pr
BspanML_lg2rpkm0.93__LOSS	-0.173962	0.230277	0.192166	-0.716323	-0.193578	0.263608	0.257468	-0.589277	-0.161325	0.282208	0.265379	-0.576134	-0.18028	0.240372	0.221183	-0.655248	12	17.1629	2	3.03561	0.8	0.875657	0.8	0.175131	0.4	0.116754	0.8	1.6	9.6	0.81728	4.26153	12.0841	16.1765	18.6224	7.01754	15.9311	6.66667	16.8285	13.6842	17.5573	250	1713	0.820299	0.902319	KLy	LOSS	CDS	min10k.min00pr
PhHs_MindFun_ADX__LOSS	-12.4655	0.969492	0.19734	-0.704786	-12.2763	0.968951	0.226728	-0.644495	-12.2795	0.968603	0.220448	-0.656695	-12.3051	0.967388	0.199691	-0.699641	0	0.40864	0	0	0	0	0	0	0	0	0	0	0	0.0583771	0.0583771	0.291886	0	0.382653	0	0.430571	0	0.431499	0	0.381679	250	1713	0.820299	0.902319	KLy	LOSS	CDS	min10k.min00pr
Kirov_NMDAR__LOSS	-13.357	0.97606	0.132249	-0.878609	-13.2235	0.975531	0.16062	-0.794199	-13.2483	0.975108	0.148283	-0.828908	-13.1171	0.973878	0.152574	-0.81652	0	0.467017	0	0.0583771	0	0	0	0	0	0	0	0	0	0.116754	0.0583771	0.291886	0	0.510204	0	0.430571	0	0.431499	0	0.508906	250	1713	0.820299	0.902319	KLy	LOSS	CDS	min10k.min00pr
PhMm_Aggr_SkeCranioLimbs_all__LOSS	-0.612828	0.123982	0.08949	-1.04823	-0.601241	0.144884	0.118605	-0.925897	-0.588602	0.143912	0.114746	-0.940264	-0.640649	0.113815	0.0864383	-1.06329	2.8	4.90368	0	0.175131	0	0.0583771	0	0.0583771	0	0.0583771	0	0.4	2.4	0.175131	1.16754	3.561	4.41176	4.84694	0.877193	4.95156	3.33333	4.63862	2.63158	5.21628	250	1713	0.820299	0.902319	KLy	LOSS	CDS	min10k.min00pr
HI_q4__LOSS	-0.432875	0.0778583	0.0553248	-1.25708	-0.464669	0.0832542	0.0693395	-1.15902	-0.419353	0.0935308	0.0759402	-1.11953	-0.482146	0.0580273	0.0439321	-1.35722	6.8	9.22358	0.4	0.81728	0	0.175131	0	0.116754	0	0.0583771	0.4	0.8	5.6	0.467017	2.0432	6.71337	6.61765	9.94898	7.01754	8.61141	5	7.55124	7.36842	11.1959	250	1713	0.820299	0.902319	KLy	LOSS	CDS	min10k.min00pr
Neurof_PathwaysAxonG__LOSS	-14.3811	0.973867	0.0124051	-1.9064	-14.338	0.973726	0.0156216	-1.80627	-14.33	0.973507	0.0143441	-1.84333	-14.3179	0.972714	0.0121385	-1.91584	0	1.22592	0	0.116754	0	0.0583771	0	0	0	0	0	0	0	0.175131	0.233508	0.81728	0	1.27551	0	1.18407	0	1.07875	0	1.39949	250	1713	0.796702	0.731547	KLy	LOSS	CDS	min10k.min00pr
Neurof_GoNervSysDev__GAIN	0.302985	0.0128613	0.017792	1.74977	0.386166	0.0114835	0.0131724	1.88034	0.263842	0.0582967	0.0648091	1.18836	0.327314	0.019226	0.0229016	1.64013	14.8	11.2668	4.4	2.21833	0.8	0.642148	0.4	0.233508	0.4	0.116754	4	6	4.8	2.21833	5.07881	3.96964	17.6471	9.43878	11.4035	12.8095	23.3333	11.8662	12.1053	10.5598	250	1713	0.225152	0.716636	KLy	GAIN	CDS	min10k.min00pr
FMR1_Targets_Darnell__GAIN	0.443541	0.0112628	0.0148661	1.8278	0.518168	0.0106949	0.0132442	1.87797	0.393157	0.032843	0.0380194	1.41999	0.443602	0.017008	0.0205529	1.68713	10.4	6.36311	2.8	0.525394	0.4	0.116754	0	0.0583771	0	0.0583771	2.4	4	4	1.22592	2.97723	2.15995	11.0294	6.37755	9.64912	6.35091	8.33333	5.71737	11.0526	7.12468	250	1713	0.225152	0.716636	KLy	GAIN	CDS	min10k.min00pr
Neurof_UnionInclusive__GAIN	0.189428	0.042099	0.0512461	1.29034	0.261087	0.0378272	0.039616	1.40213	0.148072	0.171426	0.178162	0.749186	0.200244	0.062598	0.067918	1.16802	20.8	16.5791	6	3.96964	1.6	1.22592	0.8	0.350263	0.4	0.175131	4.8	7.6	8.4	2.8021	7.29714	6.47986	22.7941	14.4133	18.4211	18.4069	26.6667	16.6127	18.9474	16.5394	250	1713	0.420782	0.716636	KLy	GAIN	CDS	min10k.min00pr
Neurof_UnionStringent__GAIN	0.272489	0.0545499	0.0643952	1.19115	0.313825	0.0633259	0.0685053	1.16428	0.209625	0.188952	0.196724	0.706143	0.258953	0.103947	0.111091	0.954321	10.8	7.35552	2	1.16754	0.8	0.350263	0.4	0.175131	0.4	0.0583771	3.2	4	3.6	1.45943	2.97723	2.91886	11.0294	6.37755	10.5263	8.18084	8.33333	7.01187	11.5789	7.76081	250	1713	0.420782	0.716636	KLy	GAIN	CDS	min10k.min00pr
Neurof_GoNeuronProj__GAIN	0.305423	0.0623311	0.0763495	1.11719	0.331758	0.0779923	0.0876242	1.05738	0.238764	0.17445	0.187622	0.726716	0.305848	0.0865654	0.0981261	1.00822	11.6	7.76416	1.2	0.934034	0.8	0.350263	0	0.175131	0	0	3.2	4	4.4	1.2843	2.8021	3.67776	11.0294	6.63265	12.2807	8.71905	8.33333	7.55124	12.6316	8.01527	250	1713	0.420782	0.716636	KLy	GAIN	CDS	min10k.min00pr
FMR1_Targets_Ascano__GAIN	0.333461	0.0650217	0.0775693	1.11031	0.364707	0.0787934	0.0883607	1.05374	0.265978	0.163727	0.176491	0.753276	0.338621	0.079221	0.0903128	1.04425	9.6	7.76416	2	0.81728	0.8	0.175131	0	0	0	0	1.6	5.2	2.8	1.34267	3.561	2.86048	10.2941	6.88776	8.77193	8.50377	15	8.09061	7.89474	7.37913	250	1713	0.420782	0.716636	KLy	GAIN	CDS	min10k.min00pr
PhHs_NervSys_ADX__GAIN	0.329185	0.0691006	0.0846079	1.07259	0.344399	0.0890728	0.100481	0.997916	0.248312	0.216838	0.229964	0.63834	0.320478	0.106917	0.119362	0.923135	7.6	5.31232	1.2	0.467017	0.4	0.233508	0.4	0.175131	0.4	0	1.2	4.4	2	0.934034	2.15995	2.21833	9.55882	4.33673	5.26316	6.13563	8.33333	5.17799	7.36842	5.47074	250	1713	0.420782	0.73301	KLy	GAIN	CDS	min10k.min00pr
Neurof_GoNervTransm__GAIN	0.356462	0.100137	0.107846	0.967196	0.355346	0.124583	0.130941	0.882926	0.256703	0.289106	0.293016	0.533108	0.297516	0.220137	0.223491	0.650739	7.2	4.61179	0.4	0.350263	0.4	0	0.4	0	0.4	0	2.4	1.6	3.2	1.22592	1.75131	1.63456	7.35294	3.57143	7.01754	5.48977	8.33333	3.66775	6.84211	5.72519	250	1713	0.420782	0.840222	KLy	GAIN	CDS	min10k.min00pr
BspanVHM_PstNat__GAIN	0.123908	0.129121	0.145083	0.838384	0.180605	0.134555	0.134764	0.870426	0.0829437	0.355617	0.364993	0.437716	0.112962	0.204557	0.216593	0.664356	17.2	14.4775	6	4.43666	2.4	1.51781	2	0.583771	1.2	0.40864	4.4	7.6	5.2	2.39346	6.07122	6.01284	21.3235	13.648	12.2807	15.1776	20	13.9159	16.3158	15.1399	250	1713	0.420782	0.886411	KLy	GAIN	CDS	min10k.min00pr
Neurof_GoSynaptic__GAIN	0.396115	0.106444	0.119338	0.923222	0.398802	0.134258	0.14517	0.838124	0.287379	0.288094	0.296549	0.527904	0.344153	0.198855	0.207989	0.681959	4.8	3.67776	1.2	0.291886	0.4	0	0.4	0	0	0	1.6	1.2	2	0.642148	1.63456	1.40105	5.14706	3.44388	4.38596	3.87513	5	3.55987	4.73684	3.81679	250	1713	0.420782	0.840222	KLy	GAIN	CDS	min10k.min00pr
Kirov_ARC__GAIN	1.45018	0.109024	0.142962	0.84478	1.43894	0.112122	0.146001	0.835643	1.3704	0.134002	0.166947	0.777422	1.41671	0.123271	0.155912	0.80712	0.8	0.233508	0	0	0	0	0	0	0	0	0	0	0.8	0.0583771	0.116754	0.0583771	0	0.127551	1.75439	0.322928	0	0.323625	1.05263	0.127226	250	1713	0.420782	0.716636	KLy	GAIN	CDS	min10k.min00pr
GI_q4__GAIN	0.104715	0.141642	0.158203	0.800786	0.143679	0.15447	0.15861	0.799669	0.0664974	0.40413	0.413054	0.383994	0.109916	0.176089	0.188296	0.725159	24.4	22.3584	9.2	6.65499	4.8	2.27671	2.4	1.16754	1.2	0.525394	4.4	11.2	8.8	2.91886	9.34034	10.0992	25	18.4949	23.6842	25.6189	26.6667	21.0356	23.6842	23.9186	250	1713	0.420782	0.91143	KLy	GAIN	CDS	min10k.min00pr
Neurof_GoNervSysDev_CNS__GAIN	0.300004	0.115973	0.135249	0.868868	0.30257	0.149776	0.165013	0.782483	0.209058	0.320833	0.333879	0.476411	0.289768	0.169804	0.184661	0.733625	7.6	5.6042	1.2	0.758903	0.4	0.291886	0.4	0.0583771	0	0	2.4	2.4	2.8	1.51781	2.56859	1.51781	10.2941	4.46429	4.38596	6.5662	10	5.50162	6.84211	5.72519	250	1713	0.420782	0.886411	KLy	GAIN	CDS	min10k.min00pr
PhMm_CompleteLethality__GAIN	0.358064	0.158309	0.177894	0.749838	0.347684	0.200661	0.21727	0.663	0.25602	0.34032	0.353958	0.451048	0.331257	0.215673	0.231934	0.634636	6	4.49504	0.8	0.350263	0	0.0583771	0	0	0	0	1.6	2	2.4	1.05079	2.0432	1.40105	8.08824	3.06122	3.50877	5.70506	10	4.42287	4.73684	4.58015	250	1713	0.527657	0.886411	KLy	GAIN	CDS	min10k.min00pr
PhMm_NeuroUnion_all__GAIN	0.0965738	0.221879	0.240373	0.619114	0.118326	0.279961	0.281941	0.549842	0.0409606	0.658175	0.661107	0.179728	0.0807273	0.370204	0.379228	0.421099	20.4	17.338	5.6	4.8453	2.4	1.45943	0.4	0.467017	0.4	0.350263	4.4	8.8	7.2	2.86048	7.00525	7.47227	20.5882	15.051	20.1754	19.268	26.6667	16.6127	18.4211	18.1934	250	1713	0.653591	0.918488	KLy	GAIN	CDS	min10k.min00pr
PhMm_Aggr_Sensory_all__GAIN	0.190717	0.230553	0.244082	0.612464	0.194033	0.297104	0.304665	0.516178	0.0992433	0.575608	0.578466	0.237722	0.150269	0.398765	0.403933	0.39369	10	8.34793	1.6	1.69294	0.4	0.116754	0.4	0	0.4	0	2	4.8	3.2	1.63456	2.68535	4.02802	11.0294	7.78061	8.77193	8.8267	13.3333	8.52211	8.94737	8.14249	250	1713	0.675561	0.918488	KLy	GAIN	CDS	min10k.min00pr
Neurof_GoNeuronBody__GAIN	0.348652	0.263309	0.280765	0.551657	0.325613	0.33234	0.344631	0.462646	0.174187	0.619893	0.622627	0.205772	0.234198	0.49733	0.501642	0.299606	2.4	1.98482	0.4	0.233508	0.4	0	0.4	0	0	0	0.4	1.2	0.8	0.467017	0.40864	1.10917	2.94118	1.91327	1.75439	2.04521	3.33333	2.1575	2.10526	1.78117	250	1713	0.691675	0.918488	KLy	GAIN	CDS	min10k.min00pr
PhMm_NeuroBehav_all__GAIN	0.112455	0.260399	0.281557	0.550433	0.119821	0.345775	0.352618	0.452695	0.0431932	0.708806	0.711401	0.147886	0.0845546	0.448418	0.457134	0.339957	13.6	12.4927	4.4	1.86807	0.4	0.642148	0.4	0.40864	0.4	0.233508	3.6	4.4	5.6	1.98482	4.90368	5.6042	13.9706	10.8418	13.1579	13.8859	20	11.6505	11.5789	13.486	250	1713	0.691675	0.918488	KLy	GAIN	CDS	min10k.min00pr
BspanHM_lg2rpkm3.21__GAIN	0.0703268	0.292326	0.311187	0.506979	0.0860859	0.37624	0.379876	0.420358	0.0286118	0.703377	0.706817	0.150693	0.064868	0.387945	0.400621	0.397266	22.4	23.2925	10.4	7.35552	3.6	2.21833	2	1.16754	1.2	0.700525	5.6	10	6.8	3.79451	10.216	9.28196	24.2647	22.1939	20.1754	24.2196	21.6667	21.6828	22.6316	25.1908	250	1713	0.699731	0.918488	KLy	GAIN	CDS	min10k.min00pr
PhMm_NervSystem_all__GAIN	0.104633	0.294027	0.311995	0.505853	0.112838	0.390131	0.393823	0.404699	0.0345461	0.762964	0.764676	0.116523	0.0790511	0.483267	0.490932	0.308979	16.4	13.6602	4	3.561	0.8	0.758903	0.4	0.40864	0.4	0.233508	3.6	7.6	5.2	2.51022	5.42907	5.72096	18.3824	11.9898	14.0351	15.07	21.6667	13.808	14.7368	13.486	250	1713	0.699731	0.918488	KLy	GAIN	CDS	min10k.min00pr
HI_q2__GAIN	0.0755173	0.321556	0.336683	0.472778	0.106084	0.394331	0.397886	0.400241	0.0242796	0.780167	0.781832	0.106887	0.076543	0.366981	0.378405	0.422044	24.4	23.9346	6.8	6.83012	2.8	2.45184	2.4	0.81728	1.2	0.350263	6.4	9.2	8.8	3.67776	9.51547	10.7414	23.5294	21.9388	25.4386	25.6189	26.6667	24.5955	23.6842	23.1552	250	1713	0.699731	0.918488	KLy	GAIN	CDS	min10k.min00pr
Kirov_NMDAR__GAIN	0.613578	0.452781	0.477583	0.320951	0.590711	0.469518	0.492973	0.307177	0.533653	0.51363	0.533633	0.272758	0.550637	0.499259	0.520474	0.283601	0.8	0.40864	0	0	0	0	0	0	0	0	0	0	0.8	0.116754	0.175131	0.116754	0	0.382653	1.75439	0.430571	0	0.323625	1.05263	0.508906	250	1713	0.784882	0.918488	KLy	GAIN	CDS	min10k.min00pr
PhHs_NervSys_All__GAIN	0.107291	0.388113	0.402318	0.39543	0.0976048	0.516859	0.521977	0.282348	0.032401	0.811962	0.813089	0.0898619	0.091433	0.501535	0.508555	0.293662	12	11.7338	2.8	2.56859	1.2	0.642148	0.8	0.291886	0.4	0.175131	1.6	6.8	3.6	1.45943	5.37069	4.90368	13.9706	10.3316	9.64912	12.9171	13.3333	11.9741	11.5789	11.4504	250	1713	0.784882	0.918488	KLy	GAIN	CDS	min10k.min00pr
SynKEGG_GABAergic__GAIN	0.353473	0.464911	0.480847	0.317993	0.312467	0.526703	0.53748	0.269638	0.11108	0.833879	0.834307	0.0786741	0.180098	0.727075	0.72887	0.13735	0.8	0.875657	0.4	0	0.4	0	0	0	0	0	0.4	0.4	0	0	0.40864	0.467017	1.47059	0.637755	0	1.07643	0	0.862999	1.05263	0.890585	250	1713	0.784882	0.918488	KLy	GAIN	CDS	min10k.min00pr
BspanVHM_EqlNat__GAIN	0.0854262	0.401786	0.416735	0.38014	0.0808912	0.545982	0.549706	0.259869	0.0258524	0.816515	0.817845	0.0873288	0.0777939	0.491696	0.500841	0.3003	15.2	15.2948	4.8	3.67776	2	1.34267	0.8	0.350263	0.8	0.116754	4.4	5.6	5.2	2.45184	6.83012	6.01284	15.4412	14.2857	14.9123	16.1464	15	14.671	15.2632	16.0305	250	1713	0.784882	0.918488	KLy	GAIN	CDS	min10k.min00pr
HI_q1__GAIN	0.0452756	0.408449	0.42577	0.370825	0.0452198	0.559778	0.565684	0.247426	0.0166897	0.781859	0.784772	0.105256	0.0415456	0.493256	0.506454	0.29546	21.2	22.3584	6.8	7.6474	4.4	3.15236	2.8	1.40105	1.6	0.875657	4.4	8.8	8	3.26912	9.39872	9.6906	22.0588	20.4082	20.1754	24.0043	16.6667	22.6537	22.6316	22.0102	250	1713	0.784882	0.918488	KLy	GAIN	CDS	min10k.min00pr
BspanVH_lg2rpkm4.74__GAIN	0.0592695	0.41308	0.428211	0.368342	0.0607416	0.569018	0.569424	0.244564	0.0154854	0.845462	0.84645	0.0723989	0.045575	0.559636	0.567334	0.246161	18.4	17.1629	6.8	5.54583	3.6	2.39346	1.6	1.10917	0.8	0.467017	3.2	7.2	8	1.98482	8.28955	6.8885	19.8529	16.4541	16.6667	17.761	23.3333	17.4757	16.8421	16.7939	250	1713	0.784882	0.918488	KLy	GAIN	CDS	min10k.min00pr
GOP_lessthan500g__GAIN	0.0161254	0.50721	0.516814	0.286665	0.0473561	0.645975	0.643528	0.191433	-0.0120918	0.702288	0.698815	-0.155638	0.0125961	0.674993	0.678904	0.168191	44	47.8109	26.8	27.7875	18.4	16.9294	12.4	10.683	8.8	7.23876	8.8	20	15.2	6.53824	20.6071	20.6655	45.5882	45.0255	42.1053	50.1615	43.3333	46.6019	44.2105	49.2366	250	1713	0.841536	0.918488	KLy	GAIN	CDS	min10k.min00pr
PhMm_Aggr_CardvascMuscle_all__GAIN	0.0788286	0.507083	0.517248	0.286302	0.0599342	0.692395	0.693757	0.158793	-0.000275422	0.998316	0.998316	-0.000731928	0.0455211	0.728981	0.731575	0.135741	15.6	12.2592	2.8	3.3275	1.2	0.875657	0	0.467017	0	0.175131	4	6.4	5.2	2.33508	5.07881	4.8453	16.1765	11.2245	14.9123	13.1324	18.3333	11.0032	14.7368	13.7405	250	1713	0.880921	0.998316	KLy	GAIN	CDS	min10k.min00pr
PhMm_Aggr_SkeCranioLimbs_all__GAIN	0.0628765	0.597901	0.616849	0.209821	0.0386995	0.78124	0.786565	0.104265	-0.0124954	0.926853	0.926189	-0.0333005	0.032569	0.804538	0.809183	0.0919535	10.8	10.3911	1.6	1.75131	1.2	0.291886	0.4	0.175131	0	0.116754	2	4.8	4	1.51781	4.72855	4.14478	12.5	8.29082	8.77193	12.1636	18.3333	10.6796	8.42105	10.0509	250	1713	0.886958	0.978447	KLy	GAIN	CDS	min10k.min00pr
GI_q1__GAIN	0.030475	0.561287	0.573669	0.241338	0.0187574	0.802301	0.804273	0.0945964	0.00361723	0.950118	0.950302	0.0221384	0.0285056	0.61726	0.626543	0.203049	24	23.2341	8	8.52306	3.2	3.561	2.8	1.80969	1.6	0.934034	3.6	10.4	10	3.38587	9.6906	10.1576	25.7353	22.7041	21.9298	23.6814	20	23.5167	25.2632	22.9008	250	1713	0.886958	0.978447	KLy	GAIN	CDS	min10k.min00pr
PhHs_MindFun_ADX__GAIN	0.202135	0.756239	0.760938	0.118651	0.135048	0.83911	0.841062	0.0751722	-0.0348399	0.959392	0.959262	-0.0180628	0.0841686	0.899954	0.900736	0.0454027	1.2	0.875657	0	0	0	0	0	0	0	0	0.8	0.4	0	0.291886	0.233508	0.350263	0.735294	0.892857	1.75439	0.861141	0	0.755124	1.57895	1.01781	250	1713	0.886958	0.978447	KLy	GAIN	CDS	min10k.min00pr
GI_q3__GAIN	0.0433134	0.598048	0.604461	0.218632	0.0207081	0.863747	0.863993	0.0634898	-0.0178086	0.846651	0.845874	-0.0726945	0.0248269	0.787305	0.788842	0.10301	22.4	20.899	8	6.01284	2.4	2.10158	0.8	1.05079	0.4	0.642148	4.8	11.6	6	3.38587	9.28196	8.23117	23.5294	19.6429	21.0526	21.9591	23.3333	20.6041	22.1053	21.2468	250	1713	0.886958	0.918488	KLy	GAIN	CDS	min10k.min00pr
BspanLA_lg2rpkm.MIN__GAIN	0.0195383	0.622809	0.630742	0.200149	0.00710119	0.9022	0.902454	0.044575	-0.022424	0.660532	0.652748	-0.185254	0.0140784	0.759519	0.762934	0.117513	21.6	25.7443	12.8	11.0333	6.8	5.37069	4.8	3.38587	3.2	1.98482	3.6	11.6	6.4	4.02802	10.0992	11.617	20.5882	22.3214	22.807	28.6329	16.6667	25.1348	23.1579	26.4631	250	1713	0.902454	0.918488	KLy	GAIN	CDS	min10k.min00pr
PSD_BayesGrant_fullset__GAIN	0.0208192	0.905619	0.906021	0.0428617	-0.0325367	0.870014	0.869566	-0.0606973	-0.0416375	0.816093	0.814733	-0.0889846	0.0201073	0.911866	0.912179	0.03992	10	9.45709	1.2	1.51781	0.4	0.350263	0	0.116754	0	0.0583771	2	4	4	1.40105	4.02802	4.02802	8.82353	9.18367	11.4035	9.68784	8.33333	9.49299	10.5263	9.41476	250	1713	0.886958	0.918488	KLy	GAIN	CDS	min10k.min00pr
PhHs_MindFun_All__GAIN	-0.0239271	0.939726	0.939534	-0.0270875	-0.0727685	0.823758	0.822296	-0.0849717	-0.118382	0.714632	0.710479	-0.148449	-0.048525	0.880874	0.880153	-0.0554416	3.6	4.43666	0.8	0.291886	0	0	0	0	0	0	0.8	1.6	1.2	0.700525	1.69294	2.0432	3.67647	4.59184	3.50877	4.30571	5	4.53074	3.15789	4.3257	250	1713	0.886958	0.918488	KLy	GAIN	CDS	min10k.min00pr
HI_q4__GAIN	0.0117399	0.899101	0.899586	0.0459575	-0.0352441	0.768175	0.767385	-0.114987	-0.0642316	0.535388	0.527493	-0.277783	-0.0138371	0.894193	0.893738	-0.0487898	18.8	19.5563	5.6	5.42907	2.4	1.80969	1.6	0.700525	0.8	0.467017	4.8	8.4	5.6	3.38587	9.04845	7.12201	20.5882	17.7296	16.6667	21.098	16.6667	18.123	19.4737	21.2468	250	1713	0.886958	0.918488	KLy	GAIN	CDS	min10k.min00pr
Neurof_KeggSynaptic__GAIN	-0.04882	0.89006	0.88922	-0.0509907	-0.10868	0.766	0.762827	-0.117574	-0.216167	0.55135	0.542549	-0.265561	-0.142896	0.690109	0.685243	-0.164156	2.4	2.8021	0.4	0.175131	0.4	0	0	0	0	0	0.4	0.4	1.6	0.291886	1.16754	1.34267	2.20588	2.04082	2.63158	3.44456	3.33333	1.94175	2.10526	3.81679	250	1713	0.886958	0.918488	KLy	GAIN	CDS	min10k.min00pr
BspanVHM_PreNat__GAIN	0.0062583	0.956133	0.95622	0.0194421	-0.0494341	0.726547	0.725465	-0.139384	-0.0616441	0.610603	0.604936	-0.21829	-0.0161611	0.892972	0.892516	-0.0493841	14.8	14.7694	4.4	3.85289	1.6	1.34267	0.4	0.525394	0	0.233508	1.6	8	5.2	2.15995	6.83012	5.77933	17.6471	14.2857	11.4035	15.1776	16.6667	14.5631	14.2105	15.0127	250	1713	0.880921	0.918488	KLy	GAIN	CDS	min10k.min00pr
PhMm_Aggr_DigestHepato_all__GAIN	-0.00780867	0.963839	0.963781	-0.0160217	-0.0702459	0.721571	0.719127	-0.143194	-0.106545	0.560722	0.553497	-0.256885	-0.0548727	0.765131	0.763019	-0.117465	9.2	10.1576	2	2.0432	0.4	0.350263	0	0.116754	0	0.0583771	1.6	4	3.6	2.0432	4.02802	4.0864	12.5	7.78061	5.26316	12.1636	13.3333	10.5717	7.89474	9.66921	250	1713	0.880921	0.918488	KLy	GAIN	CDS	min10k.min00pr
PhMm_Aggr_IntegAdipPigm_all__GAIN	-0.0226564	0.879971	0.87936	-0.0558331	-0.0788522	0.643149	0.639273	-0.194314	-0.132211	0.415556	0.406064	-0.391405	-0.0816924	0.61299	0.608514	-0.21573	10.4	10.7998	2	3.09399	0.8	0.525394	0.4	0.116754	0.4	0.0583771	4.4	1.6	4.4	2.0432	4.02802	4.72855	10.2941	9.43878	10.5263	11.9483	13.3333	10.1402	9.47368	11.5776	250	1713	0.841536	0.91143	KLy	GAIN	CDS	min10k.min00pr
Neurof_PathwaysAxonG__GAIN	-0.217275	0.623279	0.609771	-0.214833	-0.299403	0.510357	0.491395	-0.308569	-0.321696	0.470823	0.446779	-0.349907	-0.277804	0.537414	0.518799	-0.285001	2	2.27671	0	0.40864	0	0.0583771	0	0	0	0	1.2	0.4	0.4	0.642148	0.934034	0.700525	2.20588	1.78571	1.75439	2.69107	1.66667	2.1575	2.10526	2.4173	250	1713	0.784882	0.91143	KLy	GAIN	CDS	min10k.min00pr
SynKEGG_Glutamatergic__GAIN	-0.747963	0.476494	0.430527	-0.365999	-0.761471	0.468694	0.421593	-0.375107	-0.745991	0.477631	0.431818	-0.3647	-0.724461	0.490608	0.446834	-0.349854	0.4	0.700525	0	0	0	0	0	0	0	0	0	0	0.4	0.0583771	0.291886	0.350263	0	0.255102	0.877193	1.07643	0	0.323625	0.526316	1.14504	250	1713	0.716708	0.91143	KLy	GAIN	CDS	min10k.min00pr
SynKEGG_Serotonergic__GAIN	-0.871749	0.404704	0.346713	-0.46003	-0.923288	0.379625	0.318795	-0.496488	-1.14629	0.296375	0.227628	-0.642775	-1.02599	0.338136	0.27362	-0.562852	0.4	0.875657	0	0	0	0	0	0	0	0	0.4	0	0	0	0.40864	0.467017	0.735294	0.637755	0	1.07643	0	0.755124	0.526316	1.01781	250	1713	0.67744	0.73301	KLy	GAIN	CDS	min10k.min00pr
BspanML_lg2rpkm0.93__GAIN	-0.0438211	0.558056	0.551058	-0.258803	-0.144056	0.165994	0.159542	-0.797124	-0.108552	0.183894	0.17	-0.76955	-0.0756584	0.364757	0.354507	-0.450376	26.4	27.0286	8	10.0409	4.4	4.49504	1.2	1.86807	1.2	1.05079	5.2	12.4	8.8	3.96964	11.7922	11.2668	25	23.852	28.0702	29.7094	25	26.1057	26.8421	28.117	250	1713	0.420782	0.716636	KLy	GAIN	CDS	min10k.min00pr
GI_q2__GAIN	-0.0711063	0.468779	0.455433	-0.341576	-0.17955	0.15915	0.145507	-0.837116	-0.162534	0.133579	0.115616	-0.936984	-0.121753	0.262557	0.24567	-0.609648	13.2	19.6731	4.4	6.01284	2.4	2.10158	2.4	0.934034	1.2	0.642148	4.8	5.6	2.8	2.91886	9.6906	7.06363	11.7647	18.4949	14.9123	20.6674	13.3333	19.849	13.1579	19.4656	250	1713	0.420782	0.716636	KLy	GAIN	CDS	min10k.min00pr
PhMm_Aggr_EndoExocrRepr_all__GAIN	-0.128091	0.372427	0.355769	-0.448831	-0.254913	0.136351	0.124888	-0.90348	-0.274047	0.0883347	0.0713091	-1.14686	-0.186502	0.22818	0.210394	-0.676967	12	13.9521	2.8	3.09399	0.4	0.758903	0.4	0.233508	0	0.175131	3.6	4	4.4	2.56859	5.72096	5.66258	16.1765	11.9898	7.01754	15.6082	10	13.1607	12.6316	14.8855	250	1713	0.420782	0.716636	KLy	GAIN	CDS	min10k.min00pr
SynKEGG_Dopaminergic__GAIN	-1.23766	0.222851	0.133416	-0.874792	-1.31992	0.1982	0.110983	-0.954744	-1.3019	0.201345	0.112848	-0.947508	-1.23846	0.223663	0.135022	-0.869595	0.4	1.10917	0	0.0583771	0	0	0	0	0	0	0	0	0.4	0.0583771	0.467017	0.583771	0.735294	0.637755	0	1.507	1.66667	0.431499	0	1.9084	250	1713	0.420782	0.716636	KLy	GAIN	CDS	min10k.min00pr
PhMm_Aggr_HematoImmune_all__GAIN	-0.120556	0.332656	0.311314	-0.506801	-0.236778	0.106761	0.0956272	-1.01942	-0.195112	0.133641	0.11124	-0.95374	-0.158254	0.22763	0.205545	-0.687093	13.2	15.3532	2.4	4.96205	1.6	1.69294	0.4	0.642148	0	0.291886	2.8	6	4.4	2.21833	6.07122	7.06363	13.2353	12.3724	13.1579	17.8687	15	15.534	12.6316	15.1399	250	1713	0.420782	0.716636	KLy	GAIN	CDS	min10k.min00pr
HI_q3__GAIN	-0.0918129	0.340349	0.319856	-0.495045	-0.238832	0.0626504	0.0543377	-1.2649	-0.176556	0.0933617	0.0732254	-1.13534	-0.139832	0.188029	0.165557	-0.781053	18.8	21.7163	6.4	6.18797	2.4	2.15995	1.2	1.05079	0	0.583771	4	9.6	5.2	3.44425	9.80736	8.46468	22.0588	19.898	14.9123	23.2508	15	19.849	20	23.9186	250	1713	0.420782	0.716636	KLy	GAIN	CDS	min10k.min00pr
SynKEGG_Cholinergic__GAIN	-13.8022	0.965259	0.0108495	-1.96459	-13.8366	0.965129	0.00976206	-2.01046	-13.8258	0.965161	0.0100344	-1.99851	-13.8154	0.965077	0.0103018	-1.98709	0	1.16754	0	0	0	0	0	0	0	0	0	0	0	0.0583771	0.700525	0.40864	0	0.765306	0	1.507	0	0.647249	0	1.78117	250	1713	0.225152	0.511752	KLy	GAIN	CDS	min10k.min00pr
PhMm_NeuroUnion_all__LOSS	0.0724894	0.539619	0.572166	0.242478	0.429003	0.0533986	0.0591587	1.22798	0.253944	0.191652	0.204045	0.690275	0.207116	0.291429	0.302832	0.518798	11.5702	8.55775	0.826446	0.897666	0.413223	0.119689	0	0.0598444	0	0.0598444	0	2.89256	8.67769	0.359066	2.33393	5.86475	14.3939	7.94271	8.18182	9.08084	13.7931	7.40331	10.8696	9.92167	242	1671	0.733621	0.967608	KLn	LOSS	CDS	min10k.min00pr
PhMm_Aggr_EndoExocrRepr_all__LOSS	0.133842	0.417799	0.456935	0.340145	0.508043	0.0604399	0.070249	1.15336	0.35732	0.154429	0.169274	0.77141	0.319934	0.204868	0.219555	0.658458	7.43802	5.02693	0.826446	0.359066	0	0.0598444	0	0.0598444	0	0.0598444	0	2.06612	5.3719	0.119689	1.19689	3.71035	8.33333	6.25	6.36364	3.98671	6.89655	4.0884	7.6087	6.13577	242	1671	0.733621	0.967608	KLn	LOSS	CDS	min10k.min00pr
Neurof_GoNeuronBody__LOSS	1.37003	0.118831	0.157741	0.802056	1.919	0.0484736	0.0722448	1.14119	1.63138	0.0765144	0.108567	0.964304	1.50083	0.103278	0.135684	0.867471	0.826446	0.299222	0	0	0	0	0	0	0	0	0	0	0.826446	0.0598444	0.0598444	0.179533	0.757576	0.390625	0.909091	0.221484	1.72414	0.441989	0.543478	0.130548	242	1671	0.733621	0.967608	KLn	LOSS	CDS	min10k.min00pr
Neurof_GoNervTransm__LOSS	0.248907	0.384866	0.425143	0.371465	0.639887	0.113989	0.135638	0.867619	0.552886	0.164346	0.187756	0.726406	0.512269	0.199902	0.222488	0.652694	2.89256	1.67564	0.413223	0.119689	0	0.0598444	0	0.0598444	0	0.0598444	0	1.23967	1.65289	0.0598444	0.658288	0.95751	3.78788	1.69271	1.81818	1.66113	3.44828	1.21547	2.71739	2.21932	242	1671	0.733621	0.967608	KLn	LOSS	CDS	min10k.min00pr
Neurof_UnionInclusive__LOSS	0.0349605	0.799107	0.809017	0.0920423	0.348866	0.169011	0.179049	0.747029	0.189732	0.404519	0.414989	0.381963	0.138212	0.547549	0.554304	0.256252	8.67769	7.0018	0.826446	0.5386	0	0.179533	0	0.0598444	0	0.0598444	0	2.47934	6.19835	0.179533	1.67564	5.14662	10.6061	7.68229	6.36364	6.42303	8.62069	6.07735	8.69565	8.09399	242	1671	0.733621	0.967608	KLn	LOSS	CDS	min10k.min00pr
Kirov_ARC__LOSS	2.09174	0.174745	0.195678	0.708458	2.1672	0.164341	0.184657	0.733635	2.12364	0.166701	0.188513	0.72466	2.05632	0.183958	0.204032	0.690303	0.413223	0.0598444	0	0	0	0	0	0	0	0	0	0	0.413223	0	0	0.0598444	0.757576	0	0	0.110742	0	0.110497	0.543478	0	242	1671	0.733621	0.967608	KLn	LOSS	CDS	min10k.min00pr
PhMm_Aggr_IntegAdipPigm_all__LOSS	0.103654	0.585096	0.607855	0.2162	0.376771	0.176083	0.189613	0.722132	0.257011	0.328212	0.341511	0.466596	0.212465	0.422407	0.432954	0.363558	7.02479	4.90724	0	0.418911	0	0.0598444	0	0.0598444	0	0.0598444	0	0.826446	6.19835	0.179533	1.0772	3.65051	9.09091	4.6875	4.54545	5.09413	8.62069	4.64088	6.52174	5.22193	242	1671	0.733621	0.967608	KLn	LOSS	CDS	min10k.min00pr
HI_q2__LOSS	-0.0128786	0.919688	0.917825	-0.0372403	0.296476	0.19138	0.196022	0.707695	0.0789097	0.655419	0.658621	0.181365	0.0293642	0.870651	0.871092	0.0599362	14.4628	11.7893	0.826446	1.67564	0	0.299222	0	0.119689	0	0.0598444	0	2.47934	11.9835	0.478755	3.2316	8.07899	15.9091	13.9323	12.7273	9.96678	13.7931	10.2762	14.6739	13.577	242	1671	0.733621	0.967608	KLn	LOSS	CDS	min10k.min00pr
FMR1_Targets_Darnell__LOSS	0.343518	0.409642	0.427741	0.368819	0.595143	0.188496	0.209391	0.679043	0.462854	0.285522	0.306885	0.513024	0.415754	0.338961	0.357607	0.446594	2.89256	1.85518	0	0.119689	0	0	0	0	0	0	0	0.413223	2.47934	0.239378	0.5386	1.0772	3.0303	2.21354	2.72727	1.55039	3.44828	1.65746	2.71739	2.08877	242	1671	0.733621	0.967608	KLn	LOSS	CDS	min10k.min00pr
BspanHM_lg2rpkm3.21__LOSS	-0.00106597	0.992164	0.992146	-0.00342436	0.245812	0.207053	0.212943	0.671737	0.0897448	0.575237	0.580872	0.23592	0.0465457	0.77577	0.777418	0.109346	12.3967	11.3704	3.30579	1.79533	0	0.418911	0	0.179533	0	0.119689	0	2.89256	9.50413	0.598444	2.693	8.07899	10.6061	12.3698	14.5455	10.5205	12.069	9.83425	12.5	13.1854	242	1671	0.733621	0.967608	KLn	LOSS	CDS	min10k.min00pr
PhMm_NervSystem_all__LOSS	0.033718	0.824521	0.831566	0.0801034	0.323696	0.207278	0.218887	0.659779	0.184667	0.430799	0.440739	0.355819	0.13179	0.577148	0.582965	0.234358	7.43802	6.16397	0.826446	0.598444	0.413223	0.0598444	0	0.0598444	0	0.0598444	0	2.47934	4.95868	0.239378	2.09455	3.83004	7.57576	6.51042	7.27273	5.86932	6.89655	4.97238	7.6087	7.5718	242	1671	0.733621	0.967608	KLn	LOSS	CDS	min10k.min00pr
Neurof_KeggSynaptic__LOSS	0.310052	0.520057	0.555384	0.255407	0.88406	0.202062	0.23468	0.629524	0.777297	0.256171	0.287298	0.541667	0.707701	0.30602	0.333823	0.476484	1.23967	0.718133	0	0.0598444	0	0.0598444	0	0.0598444	0	0	0	0	1.23967	0.0598444	0.119689	0.5386	0.757576	0.911458	1.81818	0.55371	0	0.994475	1.63043	0.391645	242	1671	0.733621	0.967608	KLn	LOSS	CDS	min10k.min00pr
PhMm_CompleteLethality__LOSS	0.38369	0.414468	0.436171	0.360343	0.601221	0.227172	0.254486	0.594335	0.4775	0.327487	0.351369	0.454237	0.396912	0.418993	0.437354	0.359167	2.06612	1.31658	0	0.119689	0	0	0	0	0	0	0	0	2.06612	0.0598444	0.179533	1.0772	2.27273	1.30208	1.81818	1.3289	5.17241	1.21547	1.08696	1.43603	242	1671	0.733621	0.967608	KLn	LOSS	CDS	min10k.min00pr
BspanVHM_PstNat__LOSS	0.0149467	0.917441	0.919134	0.0366214	0.271396	0.249905	0.262232	0.581314	0.117644	0.571017	0.579084	0.237258	0.0585488	0.783175	0.785262	0.104985	8.26446	6.70257	1.23967	1.0772	0	0.239378	0	0.119689	0	0.119689	0	1.65289	6.61157	0.179533	1.73549	4.78755	8.33333	7.8125	8.18182	5.75858	10.3448	5.41436	7.6087	8.22454	242	1671	0.733621	0.967608	KLn	LOSS	CDS	min10k.min00pr
PhMm_NeuroBehav_all__LOSS	0.0519565	0.771976	0.78068	0.107527	0.294848	0.262449	0.27331	0.563345	0.178641	0.470126	0.478077	0.320502	0.140839	0.571986	0.577426	0.238504	8.26446	6.10413	0	0.359066	0	0.0598444	0	0.0598444	0	0.0598444	0	1.65289	6.61157	0.299222	1.43627	4.36864	9.84848	5.46875	6.36364	6.64452	6.89655	5.19337	8.69565	7.18016	242	1671	0.733621	0.967608	KLn	LOSS	CDS	min10k.min00pr
BspanVHM_PreNat__LOSS	0.00166048	0.992793	0.992807	0.00313536	0.276956	0.332957	0.344198	0.463192	0.136693	0.598191	0.605117	0.21816	0.0945938	0.716429	0.720114	0.142599	5.78512	5.20646	0.826446	0.5386	0	0.119689	0	0.119689	0	0.0598444	0	2.06612	3.71901	0.359066	1.31658	3.53082	5.30303	5.98958	6.36364	4.54042	6.89655	4.86188	5.43478	5.61358	242	1671	0.812072	0.967608	KLn	LOSS	CDS	min10k.min00pr
HI_q3__LOSS	-0.0152744	0.904619	0.901503	-0.0450329	0.198578	0.341899	0.347278	0.459323	0.080124	0.661187	0.664172	0.177719	0.0434648	0.814387	0.815326	0.0886688	11.5702	11.1909	2.47934	1.55595	0	0.119689	0	0.0598444	0	0.0598444	0.413223	2.89256	8.26446	0.718133	2.93238	7.54039	11.3636	11.9792	11.8182	10.5205	10.3448	10.0552	11.9565	12.5326	242	1671	0.812072	0.967608	KLn	LOSS	CDS	min10k.min00pr
BspanLA_lg2rpkm.MIN__LOSS	-0.0382432	0.698417	0.688375	-0.162175	0.136381	0.36145	0.366829	0.435536	0.00971831	0.929814	0.930071	0.031484	-0.0161136	0.883678	0.882924	-0.0540766	19.4215	15.6792	2.89256	3.83004	0.826446	1.25673	0	0.777977	0	0.5386	0.413223	3.30579	15.7025	0.777977	3.7702	11.1311	18.1818	16.4062	20.9091	15.0609	15.5172	14.1436	20.6522	17.4935	242	1671	0.813404	0.993915	KLn	LOSS	CDS	min10k.min00pr
PhMm_Aggr_HematoImmune_all__LOSS	0.00109561	0.995059	0.995066	0.00214803	0.227264	0.403471	0.411957	0.385148	0.103813	0.682145	0.685642	0.163902	0.0653286	0.798238	0.7997	0.097073	7.43802	6.16397	0.413223	0.239378	0	0.119689	0	0.0598444	0	0.0598444	0	0	7.43802	0.179533	1.73549	4.24895	7.57576	6.64062	7.27273	5.75858	3.44828	5.08287	8.69565	7.44125	242	1671	0.832968	0.967608	KLn	LOSS	CDS	min10k.min00pr
PhMm_Aggr_DigestHepato_all__LOSS	-0.0208677	0.923691	0.922506	-0.0350306	0.157172	0.578245	0.584506	0.233211	0.0553017	0.836648	0.83784	0.0768391	0.0216438	0.935942	0.936127	0.0286654	5.3719	5.26631	0.826446	0.359066	0	0.119689	0	0.0598444	0	0.0598444	0	0.413223	4.95868	0.299222	0.95751	4.00958	5.30303	5.85938	5.45455	4.7619	6.89655	4.75138	4.8913	5.87467	242	1671	0.908703	0.993915	KLn	LOSS	CDS	min10k.min00pr
PhHs_NervSys_All__LOSS	-0.0292198	0.911407	0.910955	-0.0405031	0.13996	0.632268	0.636428	0.196251	0.0410084	0.882588	0.8831	0.05399	-0.0031756	0.990945	0.990942	-0.0039516	6.61157	5.98444	0	0.359066	0	0.0598444	0	0.0598444	0	0.0598444	0	0.826446	5.78512	0.179533	1.91502	3.88989	6.06061	6.11979	7.27273	5.86932	5.17241	5.30387	7.06522	6.78851	242	1671	0.908703	0.993915	KLn	LOSS	CDS	min10k.min00pr
Neurof_GoSynaptic__LOSS	0.0328736	0.941437	0.941845	0.0260205	0.2327	0.648287	0.655521	0.183413	0.123473	0.804839	0.807319	0.0929551	0.0633164	0.899656	0.90031	0.0456079	2.06612	1.43627	0	0.119689	0	0.0598444	0	0.0598444	0	0	0	0.826446	1.23967	0.0598444	0.179533	1.19689	2.27273	1.5625	1.81818	1.3289	1.72414	0.773481	2.17391	2.21932	242	1671	0.908703	0.993915	KLn	LOSS	CDS	min10k.min00pr
PSD_BayesGrant_fullset__LOSS	-0.0223001	0.939551	0.939046	-0.027313	0.155646	0.656467	0.662216	0.179	0.046506	0.888553	0.889373	0.050916	-0.0176914	0.9576	0.957482	-0.0188694	4.13223	3.41113	0	0.239378	0	0.179533	0	0.119689	0	0.0598444	0	0.826446	3.30579	0.119689	0.718133	2.57331	3.0303	3.51562	5.45455	3.32226	1.72414	2.87293	4.8913	4.047	242	1671	0.908703	0.993915	KLn	LOSS	CDS	min10k.min00pr
GOP_lessthan500g__LOSS	-0.0816892	0.290926	0.248218	-0.605167	0.0859929	0.667793	0.66558	0.1768	-0.0562596	0.493263	0.485043	-0.31422	-0.093181	0.277951	0.263553	-0.579132	32.6446	32.5554	10.3306	11.0114	4.13223	3.88989	1.23967	1.67564	0	1.31658	0.826446	6.61157	25.2066	1.0772	7.95931	23.5189	34.8485	36.7188	30	29.0144	29.3103	29.7238	33.6957	35.9008	242	1671	0.908703	0.967608	KLn	LOSS	CDS	min10k.min00pr
BspanVH_lg2rpkm4.74__LOSS	-0.0717226	0.719968	0.676823	-0.169525	0.112544	0.675186	0.680129	0.167408	-0.0135358	0.955088	0.954938	-0.0200247	-0.074048	0.761228	0.757074	-0.120861	6.61157	6.34351	0.413223	0.777977	0	0.239378	0	0.179533	0	0.119689	0	2.06612	4.54545	0.418911	1.79533	4.12926	6.81818	7.94271	6.36364	4.98339	6.89655	6.07735	6.52174	6.65796	242	1671	0.908703	0.993915	KLn	LOSS	CDS	min10k.min00pr
SynKEGG_Serotonergic__LOSS	0.251749	0.81755	0.822737	0.0847389	0.456997	0.679983	0.694891	0.158083	0.363971	0.742151	0.751976	0.123796	0.372314	0.738596	0.748473	0.125824	0.413223	0.478755	0	0	0	0	0	0	0	0	0	0	0.413223	0.0598444	0.0598444	0.359066	0	0.520833	0.909091	0.442968	0	0.773481	0.543478	0.130548	242	1671	0.908703	0.967608	KLn	LOSS	CDS	min10k.min00pr
GI_q1__LOSS	-0.0838892	0.498199	0.481516	-0.317389	0.0490985	0.765438	0.766515	0.115479	-0.0520313	0.686462	0.681619	-0.166459	-0.0763575	0.561314	0.551806	-0.258213	17.7686	16.5171	2.47934	3.29144	0.413223	0.837822	0	0.5386	0	0.239378	0.826446	1.65289	15.2893	0.777977	3.29144	12.4476	19.697	18.6198	15.4545	14.7287	10.3448	15.5801	20.1087	17.624	242	1671	0.965104	0.967608	KLn	LOSS	CDS	min10k.min00pr
Neurof_GoNervSysDev__LOSS	-0.0833699	0.770493	0.755651	-0.121679	0.10328	0.773595	0.775868	0.110212	-0.00355109	0.991701	0.991698	-0.00362075	-0.0869012	0.80017	0.798055	-0.0979672	3.71901	4.3088	0.413223	0.239378	0	0.119689	0	0.0598444	0	0.0598444	0	1.23967	2.47934	0.119689	0.897666	3.29144	3.0303	4.29688	4.54545	4.31894	1.72414	4.30939	4.34783	4.30809	242	1671	0.965104	0.99696	KLn	LOSS	CDS	min10k.min00pr
GI_q3__LOSS	-0.10117	0.589692	0.538009	-0.26921	0.0379844	0.866884	0.867339	0.061811	-0.0614619	0.761099	0.758908	-0.119811	-0.0991411	0.629624	0.624489	-0.204475	7.85124	9.33573	2.06612	1.43627	0	0.239378	0	0.0598444	0	0.0598444	0	2.06612	5.78512	0.418911	2.27409	6.64273	8.33333	10.2865	7.27273	8.52713	13.7931	9.06077	5.97826	9.66057	242	1671	0.99383	0.967608	KLn	LOSS	CDS	min10k.min00pr
Neurof_GoNeuronProj__LOSS	-0.12498	0.732868	0.711197	-0.14801	0.0720854	0.871503	0.87256	0.0592048	-0.0421815	0.921173	0.920701	-0.0358813	-0.117673	0.782764	0.7792	-0.108351	2.47934	2.45362	0	0.239378	0	0.119689	0	0.0598444	0	0.0598444	0	0.826446	1.65289	0.179533	0.418911	1.85518	3.0303	2.47396	1.81818	2.43632	3.44828	2.20994	2.17391	2.74151	242	1671	0.99383	0.993915	KLn	LOSS	CDS	min10k.min00pr
FMR1_Targets_Ascano__LOSS	-0.130723	0.752003	0.744648	-0.128049	0.0596893	0.896522	0.897159	0.0471304	-0.0341833	0.939121	0.938884	-0.0273882	-0.0620149	0.88959	0.88881	-0.0511913	2.06612	2.81269	0.413223	0.0598444	0	0.0598444	0	0.0598444	0	0.0598444	0	0	2.06612	0.239378	0.718133	1.85518	1.51515	2.99479	2.72727	2.65781	1.72414	2.87293	2.17391	2.74151	242	1671	0.99383	0.993915	KLn	LOSS	CDS	min10k.min00pr
PhHs_MindFun_All__LOSS	-0.115039	0.79136	0.788258	-0.103332	0.0291074	0.948376	0.948547	0.022941	-0.0493471	0.911114	0.91058	-0.0406817	-0.0935689	0.832937	0.831077	-0.0803587	2.47934	2.693	0	0.179533	0	0	0	0	0	0	0	0.413223	2.06612	0.119689	0.5386	2.03471	0.757576	2.34375	4.54545	2.99003	0	2.65193	3.26087	2.74151	242	1671	0.997897	0.993915	KLn	LOSS	CDS	min10k.min00pr
BspanVHM_EqlNat__LOSS	-0.150987	0.548758	0.497131	-0.303529	0.00397644	0.989094	0.989099	0.00476034	-0.094097	0.724322	0.721129	-0.141987	-0.151923	0.573396	0.566181	-0.247045	6.61157	6.76242	0	0.658288	0	0.119689	0	0.0598444	0	0.0598444	0	1.23967	5.3719	0.418911	1.67564	4.66786	6.06061	7.03125	7.27273	6.53378	3.44828	6.18785	7.6087	7.44125	242	1671	0.997897	0.967608	KLn	LOSS	CDS	min10k.min00pr
SynKEGG_GABAergic__LOSS	-9.99263	0.975452	0.701526	-0.153956	-0.691142	0.998302	0.997897	-0.000914241	-1.12554	0.997235	0.99696	-0.00132229	-2.39079	0.994127	0.993363	-0.002892	0	0.0598444	0	0	0	0	0	0	0	0	0	0	0	0.0598444	0	0	0	0.130208	0	0	0	0.110497	0	0	242	1671	0.997897	0.99696	KLn	LOSS	CDS	min10k.min00pr
GI_q2__LOSS	-0.151824	0.465027	0.411701	-0.385418	-0.0103473	0.966262	0.966241	-0.0149146	-0.105469	0.626119	0.621695	-0.206422	-0.140655	0.51888	0.511665	-0.291014	7.43802	9.87433	2.47934	1.13704	0	0.0598444	0	0.0598444	0	0.0598444	0	1.23967	6.19835	0.5386	3.29144	6.04428	8.33333	11.7188	6.36364	8.30565	6.89655	8.95028	7.6087	10.9661	242	1671	0.997897	0.967608	KLn	LOSS	CDS	min10k.min00pr
Neurof_UnionStringent__LOSS	-0.215954	0.618827	0.571187	-0.243222	-0.0513836	0.91635	0.915882	-0.0381603	-0.159418	0.73576	0.729848	-0.136767	-0.247146	0.602291	0.589334	-0.229638	2.06612	2.51346	0	0.239378	0	0.119689	0	0.0598444	0	0.0598444	0	0.826446	1.23967	0.119689	0.478755	1.91502	2.27273	2.34375	1.81818	2.65781	3.44828	2.43094	1.63043	2.61097	242	1671	0.99383	0.967608	KLn	LOSS	CDS	min10k.min00pr
Neurof_GoNervSysDev_CNS__LOSS	-0.224788	0.6313	0.619563	-0.207914	-0.0526715	0.915447	0.914973	-0.0385918	-0.148785	0.758271	0.754008	-0.122624	-0.23622	0.626012	0.616214	-0.210269	2.06612	2.57331	0	0.119689	0	0.0598444	0	0	0	0	0	0.413223	1.65289	0.0598444	0.658288	1.85518	2.27273	2.73438	1.81818	2.43632	1.72414	2.65193	2.17391	2.48042	242	1671	0.99383	0.967608	KLn	LOSS	CDS	min10k.min00pr
PhMm_Aggr_CardvascMuscle_all__LOSS	-0.159507	0.506297	0.471486	-0.326531	-0.0301487	0.911896	0.911683	-0.0401563	-0.118361	0.640759	0.63601	-0.196536	-0.16703	0.514547	0.50627	-0.295618	7.02479	6.76242	0.413223	0.598444	0	0.0598444	0	0.0598444	0	0.0598444	0	0.826446	6.19835	0.359066	1.73549	4.66786	8.33333	7.29167	5.45455	6.31229	3.44828	5.08287	8.15217	8.74674	242	1671	0.99383	0.967608	KLn	LOSS	CDS	min10k.min00pr
SynKEGG_Glutamatergic__LOSS	-10.9596	0.978293	0.527596	-0.277699	-10.5256	0.974556	0.621595	-0.206493	-10.5391	0.97515	0.627595	-0.20232	-10.3661	0.975483	0.654683	-0.183969	0	0.179533	0	0.0598444	0	0	0	0	0	0	0	0	0	0.0598444	0.0598444	0.0598444	0	0.260417	0	0.110742	0	0.331492	0	0	242	1671	0.908703	0.967608	KLn	LOSS	CDS	min10k.min00pr
GI_q4__LOSS	-0.212507	0.282051	0.242824	-0.614708	-0.116101	0.603892	0.600299	-0.221633	-0.177114	0.379556	0.366102	-0.436398	-0.241205	0.239712	0.222494	-0.652682	9.91736	11.909	1.23967	1.6158	0	0.119689	0	0.119689	0	0.119689	0.413223	2.06612	7.43802	0.478755	3.35129	8.07899	11.3636	12.5	8.18182	11.4064	8.62069	11.0497	10.3261	12.9243	242	1671	0.908703	0.967608	KLn	LOSS	CDS	min10k.min00pr
PhMm_Aggr_Sensory_all__LOSS	-0.33529	0.328853	0.294578	-0.5308	-0.20396	0.579358	0.570928	-0.243419	-0.297306	0.396934	0.378202	-0.422276	-0.350932	0.321574	0.299541	-0.523543	3.71901	4.66786	0	0.299222	0	0.0598444	0	0.0598444	0	0.0598444	0	0.413223	3.30579	0.119689	1.25673	3.29144	4.54545	4.94792	2.72727	4.42968	3.44828	4.1989	3.80435	5.22193	242	1671	0.908703	0.967608	KLn	LOSS	CDS	min10k.min00pr
SynKEGG_Dopaminergic__LOSS	-11.2352	0.975563	0.459765	-0.337464	-10.733	0.972454	0.560923	-0.251097	-10.8737	0.972654	0.541293	-0.266567	-10.9219	0.971804	0.522528	-0.28189	0	0.239378	0	0.0598444	0	0	0	0	0	0	0	0	0	0.0598444	0.0598444	0.119689	0	0.390625	0	0.110742	0	0.441989	0	0	242	1671	0.908703	0.967608	KLn	LOSS	CDS	min10k.min00pr
HI_q1__LOSS	-0.211076	0.182354	0.148961	-0.826928	-0.135656	0.495721	0.49019	-0.309636	-0.181055	0.262323	0.239436	-0.62081	-0.209518	0.198269	0.173485	-0.760737	11.5702	13.2855	1.65289	3.29144	0	1.01735	0	0.418911	0	0.179533	0.413223	1.65289	9.50413	0.478755	2.87253	9.93417	12.1212	13.9323	10.9091	12.7353	10.3448	13.3702	11.9565	13.1854	242	1671	0.892845	0.967608	KLn	LOSS	CDS	min10k.min00pr
Kirov_NMDAR__LOSS	-11.6637	0.97406	0.38121	-0.418835	-12.2738	0.980321	0.440983	-0.355578	-11.3444	0.970619	0.435008	-0.361502	-12.2661	0.980208	0.441506	-0.355064	0	0.239378	0	0.0598444	0	0	0	0	0	0	0	0	0	0.0598444	0.0598444	0.119689	0	0.260417	0	0.221484	0	0.331492	0	0.130548	242	1671	0.832968	0.967608	KLn	LOSS	CDS	min10k.min00pr
SynKEGG_Cholinergic__LOSS	-11.8534	0.97315	0.342143	-0.465793	-12.3458	0.980134	0.424984	-0.371627	-11.4902	0.969957	0.401272	-0.396561	-12.3349	0.979974	0.425466	-0.371135	0	0.239378	0	0.0598444	0	0	0	0	0	0	0	0	0	0.0598444	0.119689	0.0598444	0	0.390625	0	0.110742	0	0.331492	0	0.130548	242	1671	0.832968	0.967608	KLn	LOSS	CDS	min10k.min00pr
PhHs_NervSys_ADX__LOSS	-0.68902	0.343342	0.29263	-0.533681	-0.541019	0.460466	0.424495	-0.372128	-0.636549	0.382947	0.3372	-0.472112	-0.690911	0.344799	0.295127	-0.529991	0.826446	1.43627	0	0.0598444	0	0	0	0	0	0	0	0	0.826446	0.119689	0.359066	0.95751	0	1.04167	1.81818	1.77187	0	0.994475	1.08696	1.95822	242	1671	0.832968	0.967608	KLn	LOSS	CDS	min10k.min00pr
PhMm_Aggr_SkeCranioLimbs_all__LOSS	-0.490224	0.217429	0.179091	-0.746927	-0.374118	0.369759	0.350305	-0.455553	-0.438026	0.27792	0.251216	-0.599953	-0.516199	0.20437	0.175993	-0.754505	2.89256	4.54817	0	0.179533	0	0.0598444	0	0.0598444	0	0.0598444	0	0.413223	2.47934	0.0598444	1.13704	3.35129	4.54545	4.55729	0.909091	4.54042	3.44828	4.41989	2.71739	4.69974	242	1671	0.812072	0.967608	KLn	LOSS	CDS	min10k.min00pr
PhHs_MindFun_ADX__LOSS	-12.4586	0.969503	0.198749	-0.701694	-13.0752	0.978794	0.246771	-0.607706	-13.196	0.97888	0.22503	-0.647759	-13.2777	0.978501	0.202579	-0.693405	0	0.418911	0	0	0	0	0	0	0	0	0	0	0	0.0598444	0.0598444	0.299222	0	0.390625	0	0.442968	0	0.441989	0	0.391645	242	1671	0.733621	0.967608	KLn	LOSS	CDS	min10k.min00pr
BspanML_lg2rpkm0.93__LOSS	-0.337091	0.0459653	0.0307884	-1.51161	-0.312771	0.107828	0.0988478	-1.00503	-0.312734	0.0687708	0.0547054	-1.26197	-0.352689	0.0444283	0.0328287	-1.48375	11.9835	17.1753	1.65289	3.05206	0.413223	0.837822	0.413223	0.179533	0	0.119689	0.413223	1.65289	9.91736	0.658288	4.3088	12.2083	15.9091	18.8802	7.27273	15.7254	6.89655	16.9061	13.587	17.4935	242	1671	0.733621	0.929993	KLn	LOSS	CDS	min10k.min00pr
HI_q4__LOSS	-0.602039	0.0301091	0.0164975	-1.78258	-0.553176	0.0604484	0.0458536	-1.33863	-0.569947	0.0422023	0.0279423	-1.55374	-0.656786	0.0214006	0.0121052	-1.91703	5.78512	8.91682	0	0.718133	0	0.119689	0	0.0598444	0	0.0598444	0	0.826446	4.95868	0.359066	2.03471	6.52304	6.06061	9.63542	5.45455	8.30565	3.44828	7.51381	6.52174	10.5744	242	1671	0.733621	0.929993	KLn	LOSS	CDS	min10k.min00pr
Neurof_PathwaysAxonG__LOSS	-14.2417	0.97615	0.0300177	-1.52262	-14.0365	0.975229	0.0438073	-1.35845	-14.1139	0.975287	0.0364796	-1.43795	-14.1567	0.974792	0.0295747	-1.52908	0	1.01735	0	0.119689	0	0.0598444	0	0	0	0	0	0	0	0.119689	0.239378	0.658288	0	1.04167	0	0.996678	0	0.994475	0	1.04439	242	1671	0.733621	0.929993	KLn	LOSS	CDS	min10k.min00pr
FMR1_Targets_Darnell__GAIN	0.46163	0.0245945	0.0323729	1.48982	0.512088	0.018919	0.0245016	1.61081	0.443885	0.0329894	0.0416374	1.38052	0.496701	0.0194826	0.0258671	1.58725	9.50413	5.9246	2.06612	0.418911	0	0.0598444	0	0	0	0	1.65289	3.71901	4.13223	0.897666	2.87253	2.1544	10.6061	6.11979	8.18182	5.75858	6.89655	5.19337	10.3261	6.78851	242	1671	0.416527	0.505865	KLn	GAIN	CDS	min10k.min00pr
BspanVHM_PstNat__GAIN	0.179491	0.0998101	0.113518	0.944934	0.2628	0.0535646	0.0574901	1.24041	0.165378	0.147182	0.16023	0.795257	0.207139	0.0754767	0.086398	1.0635	15.7025	13.7642	4.54545	3.83004	1.65289	1.0772	1.65289	0.239378	1.23967	0.0598444	3.30579	7.02479	5.3719	1.85518	5.86475	6.04428	19.697	13.151	10.9091	14.2857	17.2414	13.0387	15.2174	14.6214	242	1671	0.463985	0.656777	KLn	GAIN	CDS	min10k.min00pr
Neurof_GoNervSysDev__GAIN	0.26136	0.0779122	0.0947911	1.02323	0.323643	0.0566871	0.0650486	1.18676	0.241836	0.120117	0.134594	0.870975	0.308897	0.0549901	0.0664102	1.17777	12.8099	10.1137	2.89256	1.67564	0.413223	0.478755	0	0.179533	0	0.119689	2.47934	5.3719	4.95868	1.55595	4.66786	3.88989	15.9091	8.46354	9.09091	11.5172	20.6897	10.3867	10.3261	9.79112	242	1671	0.463985	0.656777	KLn	GAIN	CDS	min10k.min00pr
Neurof_UnionInclusive__GAIN	0.181264	0.121208	0.137646	0.861237	0.240468	0.08249	0.089491	1.04822	0.164215	0.188019	0.200359	0.698192	0.223743	0.0821563	0.0934558	1.02939	19.0083	15.4997	4.54545	3.35129	0.826446	0.837822	0.413223	0.239378	0	0.119689	3.30579	7.02479	8.67769	2.1544	6.88211	6.4632	21.2121	13.4115	16.3636	17.2757	24.1379	15.1381	17.3913	15.9269	242	1671	0.463985	0.68122	KLn	GAIN	CDS	min10k.min00pr
FMR1_Targets_Ascano__GAIN	0.322166	0.102037	0.117247	0.9309	0.376278	0.0798051	0.0909775	1.04107	0.298124	0.139809	0.154411	0.811321	0.365273	0.0765952	0.0891458	1.0499	8.67769	7.42071	1.65289	0.658288	0.826446	0.119689	0	0	0	0	1.23967	4.54545	2.89256	1.01735	3.47098	2.93238	9.09091	6.77083	8.18182	7.97342	12.069	7.8453	7.6087	6.91906	242	1671	0.463985	0.656777	KLn	GAIN	CDS	min10k.min00pr
Kirov_ARC__GAIN	1.62522	0.0870194	0.113822	0.943774	1.62737	0.0867693	0.113545	0.944834	1.57109	0.100698	0.127185	0.895563	1.6249	0.0900208	0.116322	0.934339	0.826446	0.179533	0	0	0	0	0	0	0	0	0	0	0.826446	0.0598444	0.0598444	0.0598444	0	0.130208	1.81818	0.221484	0	0.220994	1.08696	0.130548	242	1671	0.524272	0.656777	KLn	GAIN	CDS	min10k.min00pr
PhHs_NervSys_ADX__GAIN	0.289735	0.212651	0.237199	0.624886	0.333312	0.189636	0.206909	0.684221	0.255387	0.282366	0.301766	0.52033	0.331965	0.171423	0.193694	0.712883	6.61157	4.66786	0.826446	0.299222	0	0.119689	0	0.119689	0	0	0.826446	3.71901	2.06612	0.418911	2.09455	2.1544	8.33333	3.90625	4.54545	5.31561	5.17241	4.41989	7.06522	4.96084	242	1671	0.659522	0.903251	KLn	GAIN	CDS	min10k.min00pr
Neurof_GoNeuronProj__GAIN	0.228878	0.241432	0.259983	0.585055	0.254893	0.220069	0.235113	0.628723	0.204229	0.303146	0.318794	0.496489	0.264323	0.198302	0.214615	0.668341	9.91736	7.24117	0.413223	0.777977	0.413223	0.239378	0	0.119689	0	0	1.65289	3.71901	4.54545	0.837822	2.75284	3.65051	9.84848	6.25	10	8.08416	6.89655	6.96133	10.8696	7.5718	242	1671	0.677093	0.903251	KLn	GAIN	CDS	min10k.min00pr
Neurof_UnionStringent__GAIN	0.217978	0.249154	0.267455	0.57275	0.246253	0.224104	0.238974	0.621649	0.190329	0.326195	0.340741	0.467576	0.242637	0.224999	0.240948	0.618076	9.09091	6.88211	1.23967	1.01735	0.413223	0.239378	0	0.119689	0	0	1.65289	3.71901	3.71901	1.01735	2.93238	2.93238	9.84848	5.98958	8.18182	7.6412	6.89655	6.51934	9.78261	7.3107	242	1671	0.677093	0.914621	KLn	GAIN	CDS	min10k.min00pr
HI_q2__GAIN	0.0661615	0.4914	0.498483	0.30235	0.131865	0.331926	0.337106	0.472234	0.040092	0.703095	0.705465	0.151524	0.0985307	0.35823	0.366746	0.435634	22.7273	22.8007	5.3719	6.16397	2.06612	2.03471	2.06612	0.478755	0.826446	0.119689	4.95868	8.67769	9.09091	2.93238	8.91682	10.9515	22.7273	21.0938	22.7273	24.2525	24.1379	23.4254	22.2826	22.0627	242	1671	0.816327	0.969821	KLn	GAIN	CDS	min10k.min00pr
PhMm_CompleteLethality__GAIN	0.260996	0.373798	0.390511	0.408366	0.280383	0.357401	0.373068	0.428212	0.2216	0.457322	0.469624	0.32825	0.277811	0.356328	0.372237	0.42918	4.95868	4.12926	0.413223	0.239378	0	0.0598444	0	0	0	0	1.23967	1.65289	2.06612	0.837822	1.91502	1.37642	6.81818	2.99479	2.72727	5.09413	8.62069	4.0884	3.80435	4.17755	242	1671	0.816327	0.964863	KLn	GAIN	CDS	min10k.min00pr
GI_q4__GAIN	0.0684248	0.455755	0.465502	0.332078	0.0987097	0.37453	0.380362	0.419803	0.0490403	0.611663	0.616458	0.210097	0.09622	0.344477	0.355102	0.449647	22.314	21.544	7.02479	5.98444	2.89256	1.67564	1.23967	0.718133	0.413223	0.239378	2.47934	10.7438	9.09091	2.21424	9.09635	10.2334	23.4848	17.9688	20.9091	24.5847	24.1379	20.221	21.7391	23.107	242	1671	0.816327	0.969821	KLn	GAIN	CDS	min10k.min00pr
BspanVH_lg2rpkm4.74__GAIN	0.0668997	0.506798	0.514552	0.28857	0.101151	0.418769	0.422391	0.374286	0.0479257	0.646477	0.650354	0.18685	0.0838541	0.432199	0.441019	0.355542	17.3554	16.5171	5.3719	4.96709	2.47934	1.73549	0.826446	0.718133	0.413223	0.179533	2.47934	6.61157	8.26446	1.37642	8.19868	6.94195	18.9394	16.0156	15.4545	16.9435	20.6897	16.6851	16.3043	16.3185	242	1671	0.816327	0.969821	KLn	GAIN	CDS	min10k.min00pr
Kirov_NMDAR__GAIN	0.707443	0.394792	0.422654	0.374015	0.707996	0.394555	0.422409	0.374267	0.664025	0.425047	0.45041	0.346392	0.706079	0.395725	0.423503	0.373143	0.826446	0.359066	0	0	0	0	0	0	0	0	0	0	0.826446	0.0598444	0.179533	0.119689	0	0.260417	1.81818	0.442968	0	0.220994	1.08696	0.522193	242	1671	0.816327	0.964863	KLn	GAIN	CDS	min10k.min00pr
GI_q1__GAIN	0.0311702	0.572393	0.585415	0.232536	0.0600184	0.436631	0.447284	0.349417	0.0202468	0.727226	0.732804	0.135012	0.0416035	0.473427	0.491054	0.308871	23.1405	22.3818	7.02479	7.83962	2.47934	3.17175	2.06612	1.55595	1.65289	0.658288	2.89256	9.91736	10.3306	2.693	9.45542	10.2334	25	22.1354	20.9091	22.5914	18.9655	22.7624	24.4565	21.9321	242	1671	0.816327	0.969821	KLn	GAIN	CDS	min10k.min00pr
PhMm_NeuroUnion_all__GAIN	0.0727775	0.538543	0.545782	0.262981	0.101605	0.470772	0.474641	0.323635	0.0438986	0.725032	0.727085	0.138415	0.0939604	0.467116	0.47429	0.323956	18.1818	16.5769	4.13223	4.24895	1.65289	1.01735	0	0.179533	0	0.119689	2.47934	8.26446	7.43802	2.09455	6.94195	7.54039	18.9394	14.3229	17.2727	18.4939	24.1379	15.9116	16.3043	17.3629	242	1671	0.816327	0.969821	KLn	GAIN	CDS	min10k.min00pr
Neurof_GoNervSysDev_CNS__GAIN	0.16115	0.515451	0.528106	0.277279	0.174142	0.499839	0.511391	0.291247	0.125541	0.618573	0.626262	0.203244	0.189246	0.465168	0.478475	0.320141	6.19835	5.02693	0.413223	0.5386	0	0.239378	0	0.0598444	0	0	1.23967	2.06612	2.89256	0.95751	2.51346	1.55595	9.09091	4.16667	2.72727	5.75858	8.62069	4.86188	5.43478	5.22193	242	1671	0.816327	0.969821	KLn	GAIN	CDS	min10k.min00pr
Neurof_GoSynaptic__GAIN	0.210511	0.512872	0.523436	0.281136	0.221233	0.501729	0.512205	0.290556	0.169043	0.605174	0.612159	0.213135	0.217358	0.509852	0.520075	0.283934	4.13223	3.29144	0.413223	0.239378	0	0	0	0	0	0	1.23967	0.826446	2.06612	0.418911	1.49611	1.37642	4.54545	3.125	3.63636	3.433	3.44828	3.09392	4.34783	3.5248	242	1671	0.816327	0.969821	KLn	GAIN	CDS	min10k.min00pr
PhMm_Aggr_Sensory_all__GAIN	0.113699	0.576371	0.582629	0.234608	0.133972	0.544031	0.549475	0.260052	0.082031	0.692522	0.695672	0.157595	0.129035	0.544751	0.550997	0.258851	9.09091	7.36086	0.826446	1.43627	0	0.0598444	0	0	0	0	1.23967	4.54545	3.30579	0.95751	2.39378	4.00958	9.84848	6.51042	8.18182	8.08416	12.069	7.29282	8.15217	7.44125	242	1671	0.832637	0.969821	KLn	GAIN	CDS	min10k.min00pr
PhMm_NervSystem_all__GAIN	0.0720608	0.609001	0.614126	0.211742	0.0951996	0.557285	0.560712	0.25126	0.0374147	0.80065	0.801752	0.0959599	0.08739	0.568936	0.573502	0.241465	14.4628	12.9264	2.89256	3.11191	0.413223	0.478755	0	0.179533	0	0.119689	2.06612	7.02479	5.3719	1.91502	5.26631	5.74506	16.6667	11.3281	11.8182	14.2857	18.9655	13.0387	13.0435	12.7937	242	1671	0.832637	0.969821	KLn	GAIN	CDS	min10k.min00pr
HI_q1__GAIN	0.0239309	0.694215	0.70088	0.154357	0.0465187	0.584	0.589205	0.229733	0.0111641	0.861285	0.8627	0.0641401	0.0329956	0.609411	0.619505	0.207955	20.2479	21.3046	5.3719	7.12148	2.89256	2.75284	2.06612	1.13704	1.23967	0.598444	3.71901	8.26446	8.26446	2.57331	9.03651	9.69479	21.2121	19.2708	19.0909	23.0343	13.7931	21.326	22.2826	21.2794	242	1671	0.832637	0.969821	KLn	GAIN	CDS	min10k.min00pr
Neurof_GoNervTransm__GAIN	0.137908	0.627663	0.633234	0.198436	0.147277	0.615517	0.620889	0.206986	0.0931504	0.748195	0.750642	0.124567	0.122562	0.67925	0.682839	0.165681	5.78512	4.24895	0	0.359066	0	0	0	0	0	0	1.23967	1.23967	3.30579	0.837822	1.79533	1.6158	6.06061	3.51562	5.45455	4.87265	6.89655	3.42541	5.43478	5.22193	242	1671	0.832637	0.969821	KLn	GAIN	CDS	min10k.min00pr
PhMm_NeuroBehav_all__GAIN	0.0537242	0.729817	0.733235	0.134757	0.0665827	0.699971	0.702525	0.153339	0.0206883	0.896935	0.897367	0.0470301	0.0685612	0.675226	0.679334	0.167917	11.5702	11.7295	3.30579	1.43627	0	0.359066	0	0.179533	0	0.119689	2.06612	3.71901	5.78512	1.19689	4.8474	5.68522	12.1212	10.1562	10.9091	13.0676	17.2414	10.9392	9.78261	12.6632	242	1671	0.832637	0.969821	KLn	GAIN	CDS	min10k.min00pr
PhMm_Aggr_CardvascMuscle_all__GAIN	0.0507666	0.736576	0.739306	0.131176	0.0649147	0.702473	0.704528	0.152102	0.0148241	0.92469	0.924878	0.0339156	0.0605531	0.707531	0.710191	0.148625	13.6364	11.7295	1.65289	2.693	0.826446	0.478755	0	0.179533	0	0.0598444	2.47934	5.78512	5.3719	1.73549	5.08677	4.90724	14.3939	10.6771	12.7273	12.6246	17.2414	10.4972	12.5	13.1854	242	1671	0.832637	0.969821	KLn	GAIN	CDS	min10k.min00pr
PSD_BayesGrant_fullset__GAIN	0.0665264	0.729457	0.732245	0.135344	0.0793805	0.704095	0.706633	0.150806	0.0396124	0.839512	0.840479	0.0754731	0.0952466	0.633349	0.637915	0.195237	9.50413	8.97666	1.23967	1.0772	0.413223	0.239378	0	0.0598444	0	0	1.65289	3.71901	4.13223	1.01735	3.83004	4.12926	8.33333	8.85417	10.9091	9.08084	6.89655	8.95028	10.3261	9.00783	242	1671	0.832637	0.969821	KLn	GAIN	CDS	min10k.min00pr
BspanLA_lg2rpkm.MIN__GAIN	0.00907485	0.830178	0.832135	0.079806	0.0237451	0.724556	0.72591	0.139117	-0.0146989	0.778645	0.775149	-0.110615	0.0149708	0.750249	0.754219	0.122503	20.6612	25.0748	11.5702	10.4129	5.78512	4.90724	3.71901	2.99222	2.89256	1.85518	2.89256	11.157	6.61157	3.41113	9.93417	11.7295	20.4545	21.4844	20.9091	28.1285	15.5172	24.3094	22.2826	25.9791	242	1671	0.832637	0.969821	KLn	GAIN	CDS	min10k.min00pr
PhHs_NervSys_All__GAIN	0.044567	0.774632	0.777328	0.109396	0.0560269	0.74681	0.749002	0.125517	0.0172413	0.913463	0.913838	0.0391308	0.0647006	0.692019	0.69628	0.157216	10.7438	10.5326	2.06612	1.85518	0.413223	0.299222	0.413223	0.179533	0	0.179533	0.826446	6.19835	3.71901	0.777977	4.90724	4.8474	12.8788	9.50521	8.18182	11.4064	10.3448	10.3867	10.8696	10.705	242	1671	0.832637	0.969821	KLn	GAIN	CDS	min10k.min00pr
GI_q3__GAIN	0.0231928	0.817344	0.818509	0.0869763	0.0407403	0.755727	0.756719	0.121066	-0.00658831	0.950878	0.950805	-0.0219087	0.0360491	0.741862	0.743866	0.128505	21.0744	20.2873	7.43802	5.62537	1.65289	1.73549	0	0.658288	0	0.239378	3.71901	11.157	6.19835	2.693	9.27588	8.31837	22.7273	19.1406	19.0909	21.2625	20.6897	19.8895	21.1957	20.7572	242	1671	0.832637	0.969821	KLn	GAIN	CDS	min10k.min00pr
GOP_lessthan500g__GAIN	0.00224872	0.943209	0.943344	0.0253298	0.0311942	0.774041	0.773065	0.111784	-0.0173619	0.650762	0.646055	-0.189731	0.00922488	0.810208	0.811627	0.0906434	42.562	46.918	24.7934	26.7504	16.1157	15.9785	10.7438	9.81448	7.02479	6.4632	7.02479	19.8347	15.7025	5.74506	20.3471	20.8259	44.697	44.401	40	49.0587	41.3793	45.4144	42.9348	48.6945	242	1671	0.832637	0.969821	KLn	GAIN	CDS	min10k.min00pr
BspanHM_lg2rpkm3.21__GAIN	0.0204846	0.821104	0.822718	0.0847491	0.031677	0.775862	0.777066	0.109542	-0.00669169	0.945231	0.945087	-0.0245283	0.0336216	0.736639	0.739649	0.130974	20.2479	22.6212	7.85124	6.64273	1.65289	1.73549	1.23967	0.777977	0.826446	0.299222	3.71901	9.50413	7.02479	2.99222	10.1137	9.51526	22.7273	21.6146	17.2727	23.4773	18.9655	20.7735	20.6522	24.8042	242	1671	0.832637	0.969821	KLn	GAIN	CDS	min10k.min00pr
PhMm_Aggr_SkeCranioLimbs_all__GAIN	0.0215153	0.884898	0.887103	0.0520259	0.0263294	0.870432	0.872859	0.0590559	-0.0133983	0.931336	0.930581	-0.0312458	0.0262808	0.863305	0.866362	0.0623007	9.91736	9.93417	0.826446	1.43627	0.826446	0.119689	0	0.0598444	0	0.0598444	1.65289	4.13223	4.13223	1.13704	4.54817	4.24895	11.3636	7.94271	8.18182	11.6279	17.2414	10.1657	7.6087	9.66057	242	1671	0.908486	0.969821	KLn	GAIN	CDS	min10k.min00pr
PhHs_MindFun_ADX__GAIN	0.0589529	0.940127	0.9405	0.0266412	0.0618395	0.937852	0.938241	0.0276857	0.00662036	0.993281	0.993286	0.00292565	0.0566098	0.94263	0.94297	0.025502	0.826446	0.718133	0	0	0	0	0	0	0	0	0.413223	0.413223	0	0.179533	0.179533	0.359066	0	0.78125	1.81818	0.664452	0	0.662983	1.08696	0.78329	242	1671	0.940607	0.993286	KLn	GAIN	CDS	min10k.min00pr
Neurof_GoNeuronBody__GAIN	-0.0379573	0.939847	0.939489	-0.0271083	-0.0379893	0.94093	0.940607	-0.0265916	-0.0958678	0.850047	0.847889	-0.0716608	-0.0561502	0.912107	0.911409	-0.0402868	1.65289	1.67564	0	0.239378	0	0	0	0	0	0	0	0.826446	0.826446	0.239378	0.359066	1.0772	2.27273	1.69271	0.909091	1.66113	1.72414	1.87845	1.63043	1.43603	242	1671	0.940607	0.969821	KLn	GAIN	CDS	min10k.min00pr
BspanVHM_EqlNat__GAIN	-0.0331994	0.808173	0.806307	-0.0934996	-0.0427787	0.785061	0.783659	-0.105873	-0.0706311	0.62027	0.613794	-0.211978	-0.0247984	0.866836	0.866095	-0.0624344	13.6364	14.8414	2.89256	3.29144	0.826446	1.01735	0.413223	0.239378	0.413223	0.0598444	3.30579	4.95868	5.3719	1.97487	6.70257	6.16397	14.3939	13.9323	12.7273	15.6146	12.069	14.1436	14.1304	15.6658	242	1671	0.832637	0.969821	KLn	GAIN	CDS	min10k.min00pr
BspanVHM_PreNat__GAIN	-0.0555625	0.693845	0.690437	-0.160876	-0.0680801	0.664022	0.661436	-0.179512	-0.08637	0.551113	0.544457	-0.264037	-0.0482973	0.742566	0.740373	-0.13055	12.8099	14.0036	2.89256	3.17175	1.23967	0.897666	0.413223	0.179533	0	0	0.826446	6.61157	5.3719	1.37642	6.70257	5.9246	15.9091	13.6719	9.09091	14.2857	13.7931	13.5912	12.5	14.4909	242	1671	0.832637	0.969821	KLn	GAIN	CDS	min10k.min00pr
HI_q4__GAIN	-0.0475575	0.687372	0.683538	-0.165237	-0.063331	0.642974	0.640367	-0.193571	-0.0873522	0.481573	0.472972	-0.325164	-0.0426751	0.74079	0.738567	-0.13161	16.9421	18.7911	4.13223	4.66786	1.65289	1.37642	0.826446	0.418911	0.413223	0.179533	2.89256	8.26446	5.78512	2.693	8.97666	7.12148	18.9394	17.0573	14.5455	20.2658	15.5172	17.2376	17.3913	20.6266	242	1671	0.832637	0.964863	KLn	GAIN	CDS	min10k.min00pr
PhHs_MindFun_All__GAIN	-0.173543	0.637912	0.629801	-0.200797	-0.181526	0.630514	0.622947	-0.205549	-0.20696	0.575198	0.56442	-0.248398	-0.161122	0.665022	0.658259	-0.181603	2.89256	3.71035	0.413223	0.239378	0	0	0	0	0	0	0.413223	1.23967	1.23967	0.359066	1.31658	2.03471	2.27273	4.16667	3.63636	3.32226	3.44828	3.64641	2.71739	3.7859	242	1671	0.832637	0.969821	KLn	GAIN	CDS	min10k.min00pr
SynKEGG_Glutamatergic__GAIN	-0.639405	0.544581	0.509435	-0.292911	-0.640044	0.54448	0.509419	-0.292925	-0.645842	0.54052	0.50479	-0.29689	-0.62294	0.55516	0.521557	-0.282698	0.413223	0.658288	0	0	0	0	0	0	0	0	0	0	0.413223	0.0598444	0.299222	0.299222	0	0.260417	0.909091	0.996678	0	0.331492	0.543478	1.04439	242	1671	0.816327	0.969821	KLn	GAIN	CDS	min10k.min00pr
SynKEGG_GABAergic__GAIN	-0.677784	0.519089	0.47949	-0.319221	-0.679893	0.518494	0.479058	-0.319611	-0.699534	0.505949	0.464459	-0.333053	-0.691074	0.512062	0.471822	-0.326221	0.413223	0.837822	0	0	0	0	0	0	0	0	0	0.413223	0	0	0.418911	0.418911	0.757576	0.651042	0	0.996678	0	0.883978	0.543478	0.78329	242	1671	0.816327	0.964863	KLn	GAIN	CDS	min10k.min00pr
PhMm_Aggr_DigestHepato_all__GAIN	-0.137326	0.501776	0.490526	-0.309338	-0.158989	0.469322	0.459219	-0.337981	-0.175211	0.399296	0.384575	-0.415018	-0.13725	0.515549	0.505733	-0.296079	7.85124	9.5751	1.23967	1.91502	0	0.239378	0	0.0598444	0	0	0.413223	3.71901	3.71901	1.43627	4.00958	4.12926	11.3636	7.03125	3.63636	11.7386	12.069	9.94475	6.52174	9.13838	242	1671	0.816327	0.933969	KLn	GAIN	CDS	min10k.min00pr
Neurof_KeggSynaptic__GAIN	-0.373276	0.429357	0.4061	-0.391367	-0.378587	0.426175	0.403186	-0.394495	-0.39511	0.403884	0.379033	-0.421324	-0.367816	0.438778	0.41653	-0.380353	2.06612	2.63315	0	0.119689	0	0	0	0	0	0	0	0.413223	1.65289	0.119689	1.19689	1.31658	1.51515	1.95312	2.72727	3.21152	3.44828	1.87845	1.63043	3.5248	242	1671	0.816327	0.933969	KLn	GAIN	CDS	min10k.min00pr
Neurof_PathwaysAxonG__GAIN	-0.497691	0.391678	0.349903	-0.456052	-0.504476	0.387549	0.346623	-0.460142	-0.533723	0.359932	0.315119	-0.501525	-0.503679	0.390638	0.35026	-0.45561	1.23967	1.97487	0	0.299222	0	0.0598444	0	0	0	0	0.413223	0.413223	0.413223	0.418911	0.897666	0.658288	2.27273	1.43229	0	2.43632	1.72414	1.87845	1.08696	2.08877	242	1671	0.816327	0.903251	KLn	GAIN	CDS	min10k.min00pr
PhMm_Aggr_IntegAdipPigm_all__GAIN	-0.231581	0.240066	0.219713	-0.658145	-0.258765	0.213229	0.194735	-0.710557	-0.276207	0.169919	0.149776	-0.824559	-0.243921	0.233728	0.215152	-0.667256	8.67769	9.99402	0.826446	2.57331	0	0.299222	0	0.0598444	0	0	2.89256	1.23967	4.54545	1.25673	3.94973	4.78755	8.33333	8.72396	9.09091	11.0742	12.069	9.39227	7.6087	10.705	242	1671	0.659522	0.656777	KLn	GAIN	CDS	min10k.min00pr
SynKEGG_Dopaminergic__GAIN	-1.10671	0.275149	0.188791	-0.724018	-1.11228	0.273607	0.187702	-0.726532	-1.12585	0.267224	0.180292	-0.744024	-1.08796	0.283957	0.198922	-0.701316	0.413223	1.01735	0	0.0598444	0	0	0	0	0	0	0	0	0.413223	0	0.478755	0.5386	0.757576	0.651042	0	1.3289	1.72414	0.441989	0	1.69713	242	1671	0.659522	0.656777	KLn	GAIN	CDS	min10k.min00pr
BspanML_lg2rpkm0.93__GAIN	-0.0888027	0.31532	0.300187	-0.522607	-0.143148	0.195857	0.187342	-0.727365	-0.119705	0.193231	0.177484	-0.750842	-0.0951792	0.321499	0.30863	-0.510562	24.7934	25.7331	6.61157	8.73728	2.89256	3.71035	0.413223	1.49611	0.413223	0.718133	4.13223	11.9835	8.67769	3.17175	11.3106	11.2507	23.4848	22.7865	26.3636	28.2392	22.4138	24.6409	25.5435	27.0235	242	1671	0.659522	0.656777	KLn	GAIN	CDS	min10k.min00pr
PhMm_Aggr_EndoExocrRepr_all__GAIN	-0.221056	0.196389	0.176069	-0.754317	-0.284884	0.137387	0.123358	-0.908833	-0.304394	0.0963237	0.0786861	-1.1041	-0.237043	0.191247	0.173126	-0.761637	11.157	12.9264	1.65289	2.693	0	0.5386	0	0.0598444	0	0.0598444	2.89256	3.71901	4.54545	1.97487	5.26631	5.68522	15.1515	10.9375	6.36364	14.6179	8.62069	11.8232	11.9565	14.2298	242	1671	0.524272	0.584794	KLn	GAIN	CDS	min10k.min00pr
HI_q3__GAIN	-0.155708	0.180087	0.157846	-0.801766	-0.238453	0.0895547	0.0784668	-1.10531	-0.199335	0.0993855	0.0802658	-1.09547	-0.17214	0.166096	0.14591	-0.835914	16.9421	20.8857	4.54545	5.44584	2.06612	1.6158	0.826446	0.598444	0	0.299222	2.89256	8.67769	5.3719	2.693	9.69479	8.49791	20.4545	19.1406	12.7273	22.3699	13.7931	18.7845	17.9348	23.3681	242	1671	0.463985	0.584794	KLn	GAIN	CDS	min10k.min00pr
SynKEGG_Serotonergic__GAIN	-13.5932	0.97102	0.0509209	-1.2931	-13.5974	0.971007	0.0507292	-1.29474	-13.605	0.970971	0.0495946	-1.30457	-13.5786	0.970983	0.0522181	-1.28218	0	0.837822	0	0	0	0	0	0	0	0	0	0	0	0	0.418911	0.418911	0	0.651042	0	0.996678	0	0.773481	0	0.913838	242	1671	0.463985	0.505865	KLn	GAIN	CDS	min10k.min00pr
PhMm_Aggr_HematoImmune_all__GAIN	-0.279105	0.081516	0.0618608	-1.20858	-0.345501	0.0484266	0.0366362	-1.43609	-0.313182	0.0540547	0.0381632	-1.41836	-0.29079	0.080282	0.0627024	-1.20272	11.5702	14.7816	1.23967	4.42849	0.413223	1.37642	0	0.418911	0	0.119689	2.06612	5.3719	4.13223	1.73549	5.86475	7.18133	11.3636	11.7188	11.8182	17.3865	12.069	14.9171	11.413	14.6214	242	1671	0.463985	0.505865	KLn	GAIN	CDS	min10k.min00pr
GI_q2__GAIN	-0.211525	0.0897388	0.0662704	-1.17868	-0.325783	0.0300176	0.0212757	-1.67212	-0.26078	0.0440268	0.0282919	-1.54834	-0.235828	0.0751268	0.0555094	-1.25563	11.157	18.6116	2.89256	5.44584	1.65289	1.91502	1.65289	0.837822	0.826446	0.5386	3.71901	4.54545	2.89256	2.1544	9.45542	7.0018	9.84848	17.4479	12.7273	19.6013	10.3448	18.232	11.413	19.0601	242	1671	0.416527	0.505865	KLn	GAIN	CDS	min10k.min00pr
SynKEGG_Cholinergic__GAIN	-13.7843	0.966141	0.0136992	-1.8633	-13.7978	0.966096	0.0134311	-1.87189	-13.8073	0.966061	0.0127682	-1.89387	-13.7886	0.966046	0.013469	-1.87067	0	1.13704	0	0	0	0	0	0	0	0	0	0	0	0.0598444	0.718133	0.359066	0	0.78125	0	1.43965	0	0.662983	0	1.69713	242	1671	0.416527	0.505865	KLn	GAIN	CDS	min10k.min00pr
FMR1_Targets_Darnell__ALL	0.422844	0.00667443	0.0096714	2.01451	0.545546	0.0028964	0.0039772	2.40042	0.425159	0.00927312	0.0126217	1.89888	0.443574	0.00718643	0.0098307	2.00742	14	8.4063	2.8	0.700525	0.4	0.233508	0	0.116754	0	0.0583771	2.4	4.8	6.8	1.51781	3.50263	3.38587	15.4412	8.67347	12.2807	8.18084	11.6667	7.33549	14.7368	9.66921	250	1713	0.129775	0.321852	KLy	GAIN.LOSS	CDS	min10k.min00pr
Neurof_UnionInclusive__ALL	0.117733	0.0758495	0.097419	1.01136	0.249642	0.0222619	0.0234347	1.63014	0.151971	0.105871	0.111167	0.954026	0.148066	0.0811503	0.0884445	1.05333	27.2	22.5919	8.8	5.48745	2.4	1.69294	1.2	0.81728	0.8	0.350263	4.8	10	12.4	3.15236	8.81494	10.6246	30.8824	21.1735	22.807	23.789	31.6667	21.4671	25.7895	23.9186	250	1713	0.30033	0.566949	KLy	GAIN.LOSS	CDS	min10k.min00pr
Neurof_GoNervSysDev__ALL	0.173047	0.0580947	0.0759785	1.11931	0.312958	0.0210892	0.0235553	1.62791	0.223432	0.0779002	0.0831448	1.08017	0.216973	0.060599	0.0667895	1.17529	18	15.2948	6	3.03561	1.2	0.934034	0.4	0.350263	0.4	0.175131	4	7.2	6.8	2.51022	5.83771	6.94688	20.5882	13.5204	14.9123	16.7922	25	15.4261	15.7895	15.1399	250	1713	0.30033	0.530048	KLy	GAIN.LOSS	CDS	min10k.min00pr
Neurof_GoNervTransm__ALL	0.323163	0.0508608	0.063118	1.19985	0.40389	0.0387968	0.0434044	1.36247	0.351172	0.0741917	0.0808435	1.09235	0.369238	0.0553934	0.0613757	1.212	10	6.47986	1.6	0.583771	0.4	0.0583771	0.4	0.0583771	0.4	0.0583771	2.4	2.8	4.8	1.40105	2.39346	2.68535	11.0294	5.35714	8.77193	7.42734	10	5.17799	10	8.01527	250	1713	0.36824	0.530048	KLy	GAIN.LOSS	CDS	min10k.min00pr
Kirov_ARC__ALL	1.61199	0.0371542	0.0548289	1.26099	1.61073	0.037306	0.0549992	1.25964	1.60117	0.0387848	0.0565641	1.24746	1.60038	0.0389532	0.0567671	1.2459	1.2	0.291886	0	0	0	0	0	0	0	0	0	0	1.2	0.0583771	0.116754	0.116754	0.735294	0.127551	1.75439	0.430571	0	0.431499	1.57895	0.127226	250	1713	0.36824	0.530048	KLy	GAIN.LOSS	CDS	min10k.min00pr
BspanVHM_PstNat__ALL	0.0885566	0.171507	0.198083	0.703154	0.185318	0.078176	0.080429	1.09459	0.0885783	0.265143	0.277117	0.557337	0.0964127	0.205031	0.218308	0.66093	25.2	20.3152	8	6.18797	2.8	2.21833	2	0.81728	1.2	0.583771	4.4	9.2	11.6	2.74372	7.6474	9.92411	28.6765	20.5357	21.0526	20.1292	30	18.8781	23.6842	22.0102	250	1713	0.36824	0.688686	KLy	GAIN.LOSS	CDS	min10k.min00pr
Neurof_GoNeuronProj__ALL	0.173319	0.131361	0.161406	0.79208	0.277257	0.0864944	0.0936233	1.02862	0.191769	0.209929	0.217732	0.662078	0.193298	0.160958	0.173729	0.760128	14	10.3327	2.4	1.34267	1.2	0.525394	0	0.291886	0	0.0583771	3.2	4.8	6	1.51781	3.15236	5.66258	14.7059	9.43878	13.1579	11.0872	11.6667	9.70874	14.7368	11.0687	250	1713	0.36824	0.654299	KLy	GAIN.LOSS	CDS	min10k.min00pr
PhMm_NeuroUnion_all__ALL	0.0873152	0.172787	0.197779	0.70382	0.165249	0.0924761	0.0948612	1.02291	0.0921274	0.265912	0.274958	0.560733	0.10076	0.201232	0.21066	0.676417	27.6	24.5768	9.6	7.18039	4.4	2.0432	0.8	0.583771	0.4	0.40864	4.4	11.6	11.6	3.38587	9.22358	11.9673	29.4118	21.9388	25.4386	26.803	31.6667	22.7616	26.3158	26.7176	250	1713	0.36824	0.688686	KLy	GAIN.LOSS	CDS	min10k.min00pr
FMR1_Targets_Ascano__ALL	0.254692	0.114625	0.130085	0.885771	0.323859	0.0872468	0.0966103	1.01498	0.245396	0.164315	0.175753	0.755096	0.261856	0.133768	0.14459	0.839863	12	10.5663	2.4	0.992411	0.8	0.233508	0	0.0583771	0	0.0583771	1.6	5.2	5.2	1.69294	4.26153	4.61179	12.5	9.82143	11.4035	11.1948	16.6667	11.1111	10.5263	9.92366	250	1713	0.36824	0.654299	KLy	GAIN.LOSS	CDS	min10k.min00pr
Neurof_UnionStringent__ALL	0.151273	0.147788	0.179029	0.747078	0.252855	0.0947868	0.101086	0.995311	0.171781	0.234158	0.241296	0.61745	0.176111	0.176981	0.188384	0.724956	12.8	10.0409	2.8	1.57618	1.2	0.525394	0.4	0.291886	0.4	0.116754	3.2	4.8	4.8	1.69294	3.38587	4.96205	13.9706	8.92857	11.4035	10.9795	11.6667	9.38511	13.1579	10.8142	250	1713	0.36824	0.683671	KLy	GAIN.LOSS	CDS	min10k.min00pr
Neurof_GoSynaptic__ALL	0.295325	0.139825	0.157872	0.801694	0.345094	0.124071	0.136291	0.865534	0.282082	0.201349	0.214704	0.668161	0.30129	0.164045	0.177274	0.751355	6.8	5.13719	1.6	0.642148	0.4	0.116754	0.4	0.0583771	0	0	1.6	2	3.2	0.81728	1.80969	2.51022	8.08824	4.84694	5.26316	5.38213	6.66667	4.63862	6.84211	5.72519	250	1713	0.420308	0.654299	KLy	GAIN.LOSS	CDS	min10k.min00pr
PhMm_CompleteLethality__ALL	0.331626	0.135455	0.15327	0.814543	0.372656	0.123415	0.13783	0.860655	0.313372	0.189034	0.204628	0.689034	0.332162	0.15763	0.172327	0.763646	8	5.89609	0.8	0.525394	0	0.116754	0	0	0	0	1.6	2	4.4	1.16754	2.27671	2.45184	10.2941	4.20918	5.26316	7.3197	15	5.60949	5.78947	6.2341	250	1713	0.420308	0.654299	KLy	GAIN.LOSS	CDS	min10k.min00pr
PhMm_NeuroBehav_all__ALL	0.104433	0.21841	0.241704	0.616717	0.160044	0.159307	0.167362	0.776343	0.099441	0.331146	0.341986	0.465992	0.111179	0.260464	0.271732	0.565859	20.4	18.0385	5.6	3.09399	1.6	0.81728	0.4	0.467017	0.4	0.291886	3.6	6	10.8	2.45184	6.24635	9.34034	22.7941	15.8163	17.5439	19.9139	23.3333	16.6127	19.4737	19.7201	250	1713	0.474192	0.758317	KLy	GAIN.LOSS	CDS	min10k.min00pr
HI_q2__ALL	0.0504121	0.38261	0.405589	0.391914	0.131719	0.214518	0.217763	0.662015	0.0393323	0.599695	0.603501	0.219322	0.0507567	0.463009	0.471425	0.326587	35.2	32.9247	11.2	10.4495	3.6	3.38587	2.8	1.22592	1.6	0.642148	6.8	11.2	17.2	4.31991	12.3176	16.2872	36.0294	32.5255	34.2105	33.2616	36.6667	32.794	34.7368	33.0789	250	1713	0.498307	0.907642	KLy	GAIN.LOSS	CDS	min10k.min00pr
Neurof_GoNeuronBody__ALL	0.366219	0.210726	0.226974	0.644023	0.393049	0.20535	0.219457	0.658651	0.333526	0.278834	0.291336	0.535606	0.362464	0.242938	0.256474	0.590957	3.2	2.51022	0.4	0.233508	0.4	0	0.4	0	0	0	0.4	1.2	1.6	0.583771	0.467017	1.45943	3.67647	2.55102	2.63158	2.47578	5	2.69687	2.63158	2.29008	250	1713	0.498307	0.688686	KLy	GAIN.LOSS	CDS	min10k.min00pr
PhHs_NervSys_ADX__ALL	0.21474	0.21601	0.23484	0.629229	0.234247	0.209635	0.224727	0.648345	0.194739	0.282467	0.29708	0.527126	0.209947	0.249063	0.264612	0.57739	8.8	7.00525	1.2	0.642148	0.4	0.291886	0.4	0.175131	0.4	0	1.6	4.4	2.8	1.10917	2.45184	3.44425	10.2941	5.7398	7.01754	8.0732	8.33333	6.36462	8.94737	7.76081	250	1713	0.498307	0.688686	KLy	GAIN.LOSS	CDS	min10k.min00pr
BspanHM_lg2rpkm3.21__ALL	0.0466495	0.364921	0.391904	0.406821	0.100101	0.246075	0.248634	0.60444	0.0374886	0.579071	0.583188	0.234191	0.047332	0.446496	0.456318	0.340732	32.4	32.2825	14.4	10.9749	5.2	3.3275	2.8	1.69294	1.6	0.875657	5.6	12.8	14	4.55342	12.3759	15.3532	32.3529	31.8878	32.4561	32.6157	31.6667	29.5577	32.6316	35.4962	250	1713	0.528347	0.907642	KLy	GAIN.LOSS	CDS	min10k.min00pr
PhMm_NervSystem_all__ALL	0.0753587	0.342115	0.367714	0.434489	0.131193	0.264942	0.268475	0.571096	0.0634492	0.539422	0.544044	0.264366	0.0783079	0.417839	0.42601	0.37058	21.6	19.5563	7.6	4.8453	1.2	0.992411	0.4	0.467017	0.4	0.291886	3.6	10	8	2.91886	7.47227	9.16521	23.5294	17.7296	19.2982	21.098	25	18.2309	20.5263	21.1196	250	1713	0.547689	0.907642	KLy	GAIN.LOSS	CDS	min10k.min00pr
Neurof_GoNervSysDev_CNS__ALL	0.174769	0.312896	0.330047	0.481424	0.201222	0.300132	0.31205	0.505775	0.148425	0.440484	0.449318	0.347447	0.170413	0.367365	0.377691	0.422863	10	8.34793	1.2	0.992411	0.4	0.350263	0.4	0.116754	0	0.0583771	2.4	2.8	4.8	1.69294	3.15236	3.50263	13.2353	7.27041	6.14035	9.25727	11.6667	7.87487	9.47368	8.90585	250	1713	0.589429	0.907642	KLy	GAIN.LOSS	CDS	min10k.min00pr
GI_q4__ALL	0.0434129	0.474465	0.490509	0.309353	0.0780473	0.393501	0.396434	0.401829	0.0274535	0.711786	0.713685	0.146494	0.0400418	0.573419	0.578525	0.237678	32.4	31.6988	12	10.216	5.6	3.26912	2.8	1.40105	1.2	0.875657	4.8	13.2	14.4	3.50263	12.2592	15.937	33.8235	29.2092	30.7018	33.7998	33.3333	29.7735	32.1053	33.9695	250	1713	0.722077	0.93328	KLy	GAIN.LOSS	CDS	min10k.min00pr
PhHs_NervSys_All__ALL	0.0820757	0.460089	0.469699	0.32818	0.100817	0.44094	0.447087	0.349608	0.0612647	0.610197	0.61431	0.211613	0.0749058	0.531471	0.536924	0.270088	18.4	17.2212	3.6	3.85289	1.6	0.758903	0.8	0.350263	0.4	0.233508	2	7.6	8.8	1.75131	7.06363	8.4063	20.5882	16.5816	15.7895	17.761	16.6667	16.6127	18.9474	17.9389	250	1713	0.786257	0.907642	KLy	GAIN.LOSS	CDS	min10k.min00pr
SynKEGG_GABAergic__ALL	0.330824	0.491906	0.507336	0.294705	0.33098	0.502504	0.516404	0.28701	0.249874	0.624049	0.631413	0.199686	0.297162	0.557174	0.567047	0.246381	0.8	0.934034	0.4	0	0.4	0	0	0	0	0	0.4	0.4	0	0.0583771	0.40864	0.467017	1.47059	0.765306	0	1.07643	0	0.970874	1.05263	0.890585	250	1713	0.849568	0.907642	KLy	GAIN.LOSS	CDS	min10k.min00pr
GI_q1__ALL	0.0239436	0.609061	0.617073	0.209663	0.0360431	0.574743	0.579961	0.236601	0.0143344	0.776649	0.77934	0.108273	0.0198822	0.694314	0.699012	0.155516	38	36.6608	12.4	13.0765	4.8	5.48745	3.2	2.62697	2	1.2843	4.8	11.2	22	4.31991	12.6095	19.7315	41.1765	38.2653	34.2105	35.3068	28.3333	35.4908	41.0526	38.0407	250	1713	0.924313	0.933899	KLy	GAIN.LOSS	CDS	min10k.min00pr
BspanVH_lg2rpkm4.74__ALL	0.0259086	0.652306	0.663825	0.177947	0.0464342	0.611208	0.613652	0.212078	0.00346883	0.960938	0.961007	0.0172735	0.0178159	0.78591	0.788557	0.103167	24.8	22.5336	8.4	7.29714	3.6	3.03561	1.6	1.57618	1.2	0.700525	3.6	9.6	11.6	2.51022	10.0409	9.98249	27.2059	23.3418	21.9298	21.8515	30	22.6537	23.1579	22.3919	250	1713	0.933716	0.965783	KLy	GAIN.LOSS	CDS	min10k.min00pr
GOP_lessthan500g__ALL	0.00463027	0.81155	0.815534	0.088558	0.0395855	0.657496	0.655909	0.183157	-0.0112155	0.690712	0.688516	-0.162086	-0.000908073	0.971075	0.971025	-0.0127695	61.6	65.7326	38.4	40.5721	26.8	24.3433	16.8	15.5867	11.6	10.7414	9.6	25.2	26.8	7.76416	26.4448	31.5236	63.2353	66.8367	59.6491	64.8009	60	62.891	62.1053	69.084	250	1713	0.933716	0.93328	KLy	GAIN.LOSS	CDS	min10k.min00pr
PhMm_Aggr_Sensory_all__ALL	0.0533997	0.700248	0.70401	0.152421	0.058407	0.716856	0.718855	0.143359	0.0148389	0.922651	0.922805	0.0348901	0.0352168	0.815247	0.816134	0.0882386	13.2	12.843	2.4	2.33508	0.4	0.291886	0.4	0.116754	0.4	0.0583771	2.4	5.2	5.6	1.80969	3.91127	7.12201	15.4412	12.5	10.5263	13.1324	16.6667	12.2977	12.1053	13.486	250	1713	0.933716	0.965783	KLy	GAIN.LOSS	CDS	min10k.min00pr
HI_q1__ALL	0.0176328	0.735825	0.739655	0.130971	0.0241642	0.739655	0.741848	0.129685	0.00363615	0.949918	0.950057	0.0222504	0.0106802	0.852775	0.853878	0.068604	30.4	32.9247	10.4	12.0841	5.6	4.8453	3.2	1.92644	2.4	1.2843	5.2	10.8	14.4	3.79451	12.0841	17.0461	32.3529	31.3776	28.0702	34.2304	26.6667	33.0097	31.5789	32.8244	250	1713	0.933716	0.965783	KLy	GAIN.LOSS	CDS	min10k.min00pr
BspanLA_lg2rpkm.MIN__ALL	0.0117402	0.746798	0.750341	0.124741	0.0166172	0.750773	0.752439	0.123528	-0.00186088	0.965852	0.965783	-0.0151203	0.00601164	0.88576	0.886436	0.0523527	35.6	37.9451	18.4	16.2288	8.8	7.70578	5.2	4.49504	3.6	2.86048	4.4	14	17.2	4.90368	13.4851	19.5563	33.8235	35.7143	37.7193	39.8278	30	36.1381	37.3684	40.0763	250	1713	0.933716	0.965783	KLy	GAIN.LOSS	CDS	min10k.min00pr
Neurof_KeggSynaptic__ALL	0.0949195	0.738855	0.743049	0.128983	0.0937856	0.763184	0.765383	0.116121	0.0155667	0.960013	0.960074	0.0176955	0.0618403	0.83622	0.837341	0.0770976	4	3.67776	0.4	0.233508	0.4	0.0583771	0	0.0583771	0	0	0.4	0.4	3.2	0.467017	1.2843	1.92644	3.67647	2.93367	4.38596	4.30571	3.33333	3.12837	4.21053	4.3257	250	1713	0.933716	0.965783	KLy	GAIN.LOSS	CDS	min10k.min00pr
BspanVHM_EqlNat__ALL	0.019368	0.820445	0.823844	0.0841551	0.0214313	0.85846	0.858783	0.0661165	-0.0243912	0.814117	0.813189	-0.0898084	0.0025682	0.978707	0.978734	0.00933547	21.6	21.7163	5.2	5.07881	2	1.63456	0.8	0.467017	0.8	0.175131	4.4	6.8	10.4	2.97723	8.28955	10.4495	22.0588	20.9184	21.0526	22.3897	18.3333	20.3883	22.6316	23.2824	250	1713	0.945737	0.937114	KLy	GAIN.LOSS	CDS	min10k.min00pr
BspanVHM_PreNat__ALL	0.0155832	0.863468	0.864724	0.0631227	0.0131051	0.914761	0.914838	0.0386557	-0.0213787	0.83555	0.834863	-0.0783845	-0.000331598	0.997311	0.99731	-0.00116965	18.8	19.2644	7.2	5.19556	2.4	1.69294	0.8	0.81728	0	0.467017	1.6	9.6	7.6	2.56859	8.11442	8.58144	21.3235	19.3878	15.7895	19.1604	23.3333	18.5545	17.3684	20.1018	250	1713	0.945737	0.937114	KLy	GAIN.LOSS	CDS	min10k.min00pr
PhMm_Aggr_IntegAdipPigm_all__ALL	0.0187506	0.876799	0.877534	0.0567362	0.0138648	0.92252	0.922656	0.03496	-0.0264117	0.845837	0.84524	-0.0730198	-0.00248113	0.984925	0.984919	-0.00659947	17.6	15.2364	2	3.91127	0.8	0.758903	0.4	0.233508	0.4	0.116754	4.4	2.4	10.8	2.27671	5.02043	7.93929	19.8529	13.648	14.9123	16.577	21.6667	14.3474	16.3158	16.285	250	1713	0.945737	0.937114	KLy	GAIN.LOSS	CDS	min10k.min00pr
PhMm_Aggr_CardvascMuscle_all__ALL	0.00728978	0.943479	0.94371	0.0251612	-0.00269708	0.983791	0.983788	-0.00709837	-0.0396909	0.73383	0.732269	-0.135329	-0.0145718	0.897205	0.896805	-0.0473021	22	18.7391	4	4.55342	1.2	0.992411	0	0.525394	0	0.233508	4	7.2	10.8	2.8021	6.77175	9.16521	23.5294	17.9847	20.1754	19.3757	21.6667	15.9655	22.1053	22.0102	250	1713	0.983788	0.933643	KLy	GAIN.LOSS	CDS	min10k.min00pr
GI_q3__ALL	0.0028487	0.965378	0.965515	0.0152411	-0.00912129	0.927266	0.927193	-0.03283	-0.0359829	0.642127	0.639539	-0.194133	-0.0139906	0.85011	0.848727	-0.0712322	30	28.021	10.8	9.04845	2.4	2.97723	0.8	1.45943	0.4	0.81728	4.8	13.6	11.6	3.91127	11.3252	12.7846	32.3529	27.2959	27.193	28.6329	36.6667	27.8317	27.8947	28.2443	250	1713	0.945737	0.907642	KLy	GAIN.LOSS	CDS	min10k.min00pr
PSD_BayesGrant_fullset__ALL	-0.00352574	0.980361	0.980343	-0.00862178	-0.0179364	0.913748	0.913577	-0.0392546	-0.0401762	0.788816	0.787405	-0.103802	-0.0208041	0.888196	0.887751	-0.051709	14.8	12.9597	1.6	2.39346	0.4	0.700525	0	0.291886	0	0.175131	2	4.8	8	1.57618	4.78692	6.59661	13.2353	12.8827	16.6667	13.0248	11.6667	12.1899	15.7895	13.8677	250	1713	0.945737	0.933899	KLy	GAIN.LOSS	CDS	min10k.min00pr
PhHs_MindFun_All__ALL	-0.0424899	0.863734	0.862973	-0.064003	-0.0554319	0.829189	0.828102	-0.081916	-0.0783136	0.757247	0.754898	-0.122111	-0.0607918	0.80896	0.807532	-0.0928402	6	7.12201	1.2	0.583771	0	0	0	0	0	0	1.2	2	2.8	0.81728	2.21833	4.0864	5.14706	7.01531	7.01754	7.21206	5	7.11974	6.31579	7.12468	250	1713	0.938516	0.933899	KLy	GAIN.LOSS	CDS	min10k.min00pr
PhHs_MindFun_ADX__ALL	-0.123034	0.845235	0.843072	-0.0741355	-0.14863	0.818094	0.815263	-0.0887023	-0.242537	0.713422	0.706101	-0.151133	-0.178224	0.781652	0.777524	-0.109286	1.2	1.2843	0	0	0	0	0	0	0	0	0.8	0.4	0	0.350263	0.291886	0.642148	0.735294	1.27551	1.75439	1.29171	0	1.18662	1.57895	1.39949	250	1713	0.938516	0.93328	KLy	GAIN.LOSS	CDS	min10k.min00pr
Kirov_NMDAR__ALL	-0.169095	0.820015	0.815834	-0.0883982	-0.196182	0.794259	0.789482	-0.102658	-0.344901	0.652929	0.640688	-0.193353	-0.224855	0.76204	0.755416	-0.121814	0.8	0.875657	0	0.0583771	0	0	0	0	0	0	0	0	0.8	0.233508	0.233508	0.40864	0	0.892857	1.75439	0.861141	0	0.755124	1.05263	1.01781	250	1713	0.936363	0.907642	KLy	GAIN.LOSS	CDS	min10k.min00pr
PhMm_Aggr_SkeCranioLimbs_all__ALL	-0.0246303	0.851522	0.849171	-0.0710049	-0.0435899	0.773584	0.768942	-0.114106	-0.0718432	0.624755	0.612358	-0.212995	-0.0502093	0.723427	0.716402	-0.144843	13.2	14.7694	2	2.27671	1.2	0.467017	0.4	0.233508	0	0.175131	2	5.2	6	1.69294	5.83771	7.23876	16.1765	12.5	9.64912	16.6846	20	14.7789	11.0526	14.7583	250	1713	0.933716	0.907642	KLy	GAIN.LOSS	CDS	min10k.min00pr
SynKEGG_Glutamatergic__ALL	-0.229469	0.757623	0.75007	-0.124898	-0.25573	0.733094	0.724962	-0.139685	-0.38114	0.614388	0.598943	-0.222614	-0.268244	0.716026	0.706235	-0.151051	0.8	0.934034	0	0.0583771	0	0	0	0	0	0	0	0	0.8	0.175131	0.350263	0.40864	0.735294	0.510204	0.877193	1.29171	0	0.755124	1.05263	1.14504	250	1713	0.933716	0.907642	KLy	GAIN.LOSS	CDS	min10k.min00pr
PhMm_Aggr_DigestHepato_all__ALL	-0.0334871	0.807408	0.804919	-0.0942476	-0.0580767	0.711947	0.709911	-0.148796	-0.0900933	0.535468	0.530279	-0.275495	-0.059405	0.676966	0.672405	-0.172369	13.2	15.3532	3.6	2.8021	0.8	0.467017	0	0.175131	0	0.116754	1.6	4.4	7.2	2.39346	4.96205	7.99766	15.4412	13.5204	10.5263	16.8999	18.3333	15.2104	11.5789	15.5216	250	1713	0.933716	0.907642	KLy	GAIN.LOSS	CDS	min10k.min00pr
PhMm_Aggr_EndoExocrRepr_all__ALL	-0.0241443	0.830564	0.829031	-0.081429	-0.056263	0.696134	0.694713	-0.158195	-0.0873471	0.500542	0.494529	-0.305809	-0.0535656	0.662614	0.659147	-0.181018	18	18.6807	5.2	3.85289	1.2	0.992411	0.4	0.291886	0	0.233508	4	6	8	2.8021	6.8885	8.99008	22.7941	17.8571	12.2807	19.3757	15	16.9364	18.9474	20.7379	250	1713	0.933716	0.907642	KLy	GAIN.LOSS	CDS	min10k.min00pr
SynKEGG_Serotonergic__ALL	-0.472684	0.529451	0.503853	-0.297696	-0.498438	0.512092	0.485415	-0.313887	-0.603408	0.442408	0.407585	-0.389782	-0.524411	0.491059	0.462194	-0.335176	0.8	1.40105	0	0	0	0	0	0	0	0	0.4	0	0.4	0.116754	0.467017	0.81728	0.735294	1.14796	0.877193	1.61464	0	1.61812	1.05263	1.14504	250	1713	0.825206	0.866118	KLy	GAIN.LOSS	CDS	min10k.min00pr
HI_q4__ALL	-0.0589483	0.498868	0.485534	-0.31378	-0.113072	0.303493	0.297831	-0.526031	-0.116916	0.231595	0.2181	-0.661345	-0.0916723	0.336328	0.321564	-0.492733	23.6	26.5032	7.2	7.41389	3.2	2.74372	1.6	1.05079	0.8	0.583771	4.8	8.8	10	3.85289	10.7998	11.8506	25	25.2551	21.9298	27.5565	21.6667	23.8403	24.2105	29.6438	250	1713	0.584206	0.654299	KLy	GAIN.LOSS	CDS	min10k.min00pr
PhMm_Aggr_HematoImmune_all__ALL	-0.0878034	0.405736	0.386244	-0.413138	-0.156738	0.223817	0.215855	-0.665838	-0.143612	0.195744	0.181332	-0.741526	-0.11645	0.290254	0.270702	-0.567508	20	20.7823	3.6	6.30473	2	1.86807	0.4	0.81728	0	0.350263	2.8	6	11.2	2.51022	7.6474	10.6246	20.5882	18.3673	19.2982	22.8202	18.3333	19.849	20.5263	21.883	250	1713	0.498307	0.654299	KLy	GAIN.LOSS	CDS	min10k.min00pr
HI_q3__ALL	-0.0582777	0.457864	0.435043	-0.361468	-0.134722	0.20301	0.194768	-0.710482	-0.115955	0.167795	0.154045	-0.812351	-0.0876526	0.301273	0.275011	-0.56065	29.2	31.2318	8.8	9.04845	3.6	2.97723	1.6	1.2843	0.4	0.700525	4.4	12	12.8	4.31991	12.4343	14.4775	32.3529	29.8469	25.4386	32.4004	25	27.9396	30.5263	35.1145	250	1713	0.498307	0.654299	KLy	GAIN.LOSS	CDS	min10k.min00pr
GI_q2__ALL	-0.0763825	0.369344	0.340927	-0.467339	-0.157667	0.154865	0.140103	-0.853553	-0.139477	0.117451	0.102441	-0.989526	-0.113487	0.22047	0.191417	-0.718021	19.6	27.8459	7.6	8.23117	3.2	2.51022	2.8	1.34267	1.2	0.81728	5.2	6.4	8	3.561	12.5511	11.7338	18.3824	28.0612	21.0526	27.6642	20	27.5081	19.4737	28.2443	250	1713	0.420308	0.566949	KLy	GAIN.LOSS	CDS	min10k.min00pr
Neurof_PathwaysAxonG__ALL	-0.622518	0.167785	0.123551	-0.908155	-0.684697	0.133983	0.0978395	-1.00949	-0.719329	0.110615	0.075296	-1.12323	-0.660231	0.142769	0.101099	-0.995254	2	3.50263	0	0.525394	0	0.116754	0	0	0	0	1.2	0.4	0.4	0.81728	1.16754	1.51781	2.20588	3.06122	1.75439	3.87513	1.66667	3.23625	2.10526	3.81679	250	1713	0.36824	0.530048	KLy	GAIN.LOSS	CDS	min10k.min00pr
SynKEGG_Dopaminergic__ALL	-1.30902	0.193907	0.10178	-0.992338	-1.37137	0.175128	0.0883615	-1.05374	-1.45756	0.142921	0.064377	-1.19127	-1.3429	0.180515	0.0894206	-1.04856	0.4	1.34267	0	0.116754	0	0	0	0	0	0	0	0	0.4	0.116754	0.525394	0.700525	0.735294	1.02041	0	1.61464	1.66667	0.862999	0	1.9084	250	1713	0.36824	0.530048	KLy	GAIN.LOSS	CDS	min10k.min00pr
BspanML_lg2rpkm0.93__ALL	-0.0744247	0.260647	0.240408	-0.619052	-0.163071	0.0680224	0.0643083	-1.19173	-0.120212	0.0873147	0.0788075	-1.10343	-0.105166	0.142441	0.12661	-0.897533	34.8	39.9299	11.2	15.1197	6.4	6.65499	2.8	2.39346	1.6	1.40105	6	13.6	15.2	4.78692	15.3532	19.7898	36.0294	38.2653	33.3333	41.3348	31.6667	38.835	35.7895	41.2214	250	1713	0.36824	0.530048	KLy	GAIN.LOSS	CDS	min10k.min00pr
SynKEGG_Cholinergic__ALL	-14.5923	0.973465	0.00576486	-2.23921	-14.6297	0.973525	0.00508922	-2.29335	-14.5947	0.97327	0.00368402	-2.43368	-14.6154	0.973531	0.00507986	-2.29415	0	1.51781	0	0.0583771	0	0	0	0	0	0	0	0	0	0.233508	0.81728	0.467017	0	1.14796	0	1.82992	0	1.18662	0	1.9084	250	1713	0.129775	0.187885	KLy	GAIN.LOSS	CDS	min10k.min00pr
FMR1_Targets_Darnell__ALL	0.445028	0.0163862	0.0221893	1.65386	0.559206	0.00547979	0.0077799	2.10903	0.471315	0.0137636	0.0184529	1.73394	0.49525	0.0106313	0.0144565	1.83994	12.3967	7.71993	2.06612	0.5386	0	0.119689	0	0	0	0	1.65289	4.13223	6.61157	1.13704	3.35129	3.2316	13.6364	8.20312	10.9091	7.30897	10.3448	6.74033	13.0435	8.87728	242	1671	0.24705	0.429979	KLn	GAIN.LOSS	CDS	min10k.min00pr
BspanVHM_PstNat__ALL	0.103428	0.180808	0.211059	0.675596	0.258538	0.0284361	0.0310572	1.50784	0.150609	0.126796	0.136112	0.866103	0.153827	0.10085	0.115463	0.937557	23.5537	19.4494	6.19835	5.44584	1.65289	1.73549	1.65289	0.418911	1.23967	0.179533	3.30579	8.26446	11.9835	2.03471	7.48055	9.93417	27.2727	20.0521	19.0909	18.9369	27.5862	17.9006	22.2826	21.2794	242	1671	0.314808	0.661168	KLn	GAIN.LOSS	CDS	min10k.min00pr
Neurof_UnionInclusive__ALL	0.0969578	0.200985	0.236843	0.62554	0.249107	0.0360385	0.0399411	1.39858	0.161254	0.126643	0.134492	0.871302	0.15631	0.103516	0.120645	0.91849	25.2066	21.0054	7.02479	4.72771	1.23967	1.19689	0.413223	0.598444	0.413223	0.239378	3.30579	9.50413	12.3967	2.33393	8.31837	10.3531	28.7879	19.7917	20.9091	22.0377	29.3103	19.779	23.913	22.4543	242	1671	0.314808	0.661168	KLn	GAIN.LOSS	CDS	min10k.min00pr
Kirov_ARC__ALL	1.75597	0.0294944	0.0425016	1.37159	1.77123	0.0283459	0.041106	1.38609	1.75997	0.029175	0.0421548	1.37515	1.7819	0.0271883	0.0399602	1.39837	1.23967	0.239378	0	0	0	0	0	0	0	0	0	0	1.23967	0.0598444	0.0598444	0.119689	0.757576	0.130208	1.81818	0.332226	0	0.331492	1.63043	0.130548	242	1671	0.314808	0.429979	KLn	GAIN.LOSS	CDS	min10k.min00pr
Neurof_GoNervSysDev__ALL	0.124849	0.238947	0.274042	0.562183	0.276659	0.0686758	0.0763942	1.11694	0.192726	0.169689	0.179895	0.744982	0.190934	0.142045	0.161158	0.792749	15.7025	13.5847	4.13223	2.45362	0.413223	0.718133	0	0.299222	0	0.179533	2.47934	6.61157	6.61157	1.67564	5.386	6.52304	18.1818	12.1094	12.7273	14.8394	22.4138	13.7017	13.587	13.4465	242	1671	0.487013	0.716673	KLn	GAIN.LOSS	CDS	min10k.min00pr
FMR1_Targets_Ascano__ALL	0.220268	0.207831	0.224849	0.64811	0.326453	0.0972117	0.108049	0.966379	0.247438	0.184098	0.196734	0.706121	0.26183	0.160313	0.173227	0.761385	10.7438	10.1137	2.06612	0.837822	0.826446	0.179533	0	0.0598444	0	0.0598444	1.23967	4.54545	4.95868	1.25673	4.18911	4.66786	10.6061	9.63542	10.9091	10.5205	13.7931	10.6077	9.78261	9.53003	242	1671	0.55105	0.716673	KLn	GAIN.LOSS	CDS	min10k.min00pr
PhMm_NeuroUnion_all__ALL	0.0704329	0.391098	0.415004	0.381948	0.180878	0.125455	0.129822	0.88665	0.104416	0.314245	0.32067	0.493941	0.11244	0.258815	0.27239	0.564808	25.2066	23.3992	8.26446	6.40335	2.89256	1.55595	0.413223	0.239378	0	0.179533	2.47934	11.157	11.5702	2.45362	9.15619	11.7893	27.2727	20.8333	22.7273	25.5814	29.3103	21.768	23.913	25.3264	242	1671	0.586132	0.91474	KLn	GAIN.LOSS	CDS	min10k.min00pr
PhMm_CompleteLethality__ALL	0.293084	0.236639	0.255687	0.592292	0.382551	0.146817	0.163684	0.785995	0.323788	0.212261	0.229302	0.639593	0.338375	0.190601	0.207779	0.682398	7.02479	5.386	0.413223	0.359066	0	0.119689	0	0	0	0	1.23967	1.65289	4.13223	0.897666	2.09455	2.39378	9.09091	4.16667	4.54545	6.42303	13.7931	5.19337	4.8913	5.61358	242	1671	0.586132	0.759175	KLn	GAIN.LOSS	CDS	min10k.min00pr
HI_q2__ALL	0.0317241	0.648248	0.658643	0.18135	0.157557	0.168365	0.172392	0.763484	0.0511226	0.560713	0.564043	0.248688	0.0584132	0.485906	0.495637	0.304836	33.0579	31.7175	9.50413	9.63495	2.47934	2.93238	2.06612	0.837822	1.23967	0.359066	4.95868	10.7438	17.3554	3.41113	11.7893	16.5171	34.0909	31.7708	31.8182	31.6722	34.4828	31.4917	32.6087	31.9843	242	1671	0.586132	0.91474	KLn	GAIN.LOSS	CDS	min10k.min00pr
Neurof_GoNervTransm__ALL	0.188576	0.357167	0.377512	0.42307	0.28149	0.227447	0.240724	0.618481	0.226191	0.321127	0.332481	0.478233	0.252334	0.266599	0.280927	0.551407	8.26446	5.80491	0.826446	0.598444	0	0.0598444	0	0.0598444	0	0.0598444	1.23967	2.47934	4.54545	0.897666	2.39378	2.51346	9.09091	5.07812	7.27273	6.42303	8.62069	4.64088	8.15217	7.18016	242	1671	0.710463	0.91474	KLn	GAIN.LOSS	CDS	min10k.min00pr
Neurof_GoNeuronProj__ALL	0.0955597	0.493254	0.518077	0.285606	0.206088	0.261382	0.274931	0.560777	0.136105	0.430594	0.439541	0.357001	0.143752	0.376547	0.396458	0.401802	11.9835	9.39557	0.826446	1.13704	0.413223	0.359066	0	0.239378	0	0.0598444	1.65289	4.54545	5.78512	1.01735	3.11191	5.26631	12.8788	8.59375	10.9091	10.0775	10.3448	8.95028	12.5	9.92167	242	1671	0.710463	0.91474	KLn	GAIN.LOSS	CDS	min10k.min00pr
PhMm_NervSystem_all__ALL	0.0526448	0.594777	0.609505	0.215023	0.150865	0.272863	0.278613	0.554999	0.0810093	0.515375	0.519399	0.284499	0.0940604	0.430366	0.441877	0.354699	19.4215	18.4321	6.19835	4.18911	0.826446	0.658288	0	0.239378	0	0.179533	2.06612	9.50413	7.85124	2.1544	7.30102	8.97666	21.2121	16.7969	17.2727	19.8228	22.4138	17.2376	18.4783	19.8433	242	1671	0.710463	0.91474	KLn	GAIN.LOSS	CDS	min10k.min00pr
Neurof_UnionStringent__ALL	0.0802109	0.555266	0.577154	0.238708	0.189067	0.296629	0.310669	0.507702	0.120136	0.484023	0.49174	0.308264	0.131845	0.413042	0.432095	0.364421	10.7438	9.09635	1.65289	1.37642	0.413223	0.359066	0	0.239378	0	0.0598444	1.65289	4.54545	4.54545	1.13704	3.35129	4.60802	12.1212	8.07292	9.09091	9.96678	10.3448	8.61878	10.8696	9.66057	242	1671	0.720187	0.91474	KLn	GAIN.LOSS	CDS	min10k.min00pr
BspanVH_lg2rpkm4.74__ALL	0.0197005	0.789302	0.795111	0.0995723	0.102675	0.357529	0.362079	0.441197	0.0319026	0.725626	0.727811	0.137981	0.0412837	0.634101	0.643004	0.191787	23.1405	21.6637	6.61157	6.40335	2.47934	2.27409	0.826446	1.01735	0.413223	0.359066	2.47934	8.67769	11.9835	1.79533	9.87433	9.99402	25.7576	22.6562	20	20.8195	27.5862	21.8785	21.7391	21.4099	242	1671	0.780572	0.922496	KLn	GAIN.LOSS	CDS	min10k.min00pr
PhHs_NervSys_ADX__ALL	0.149769	0.500582	0.512158	0.290596	0.207758	0.376167	0.389624	0.409354	0.155952	0.489031	0.500462	0.300629	0.166348	0.463133	0.475382	0.322957	7.43802	5.98444	0.826446	0.418911	0	0.179533	0	0.119689	0	0	0.826446	3.71901	2.89256	0.5386	2.39378	3.05206	8.33333	4.94792	6.36364	6.866	5.17241	5.41436	8.15217	6.65796	242	1671	0.780572	0.91474	KLn	GAIN.LOSS	CDS	min10k.min00pr
PhMm_NeuroBehav_all__ALL	0.0528212	0.652773	0.660469	0.180147	0.125115	0.383854	0.390354	0.408541	0.0681703	0.606008	0.609827	0.214793	0.0786694	0.544799	0.552022	0.258044	18.1818	16.9958	4.13223	2.57331	0.826446	0.478755	0	0.239378	0	0.179533	2.06612	5.3719	10.7438	1.49611	6.22382	9.27588	20.4545	14.974	15.4545	18.7154	20.6897	15.5801	17.3913	18.6684	242	1671	0.780572	0.91474	KLn	GAIN.LOSS	CDS	min10k.min00pr
GI_q1__ALL	0.00862421	0.869096	0.87022	0.0603707	0.056454	0.427365	0.435268	0.361243	0.0105283	0.846738	0.848216	0.0714936	0.0144314	0.793307	0.795948	0.0991151	37.6033	35.787	11.157	12.3279	3.71901	5.08677	2.06612	2.27409	1.65289	1.01735	3.71901	11.157	22.7273	3.47098	12.4476	19.8683	40.9091	37.7604	33.6364	34.1085	27.5862	34.6961	40.7609	37.0757	242	1671	0.780572	0.922496	KLn	GAIN.LOSS	CDS	min10k.min00pr
BspanLA_lg2rpkm.MIN__ALL	0.000801515	0.983516	0.983534	0.00721068	0.0477019	0.435591	0.43914	0.357397	0.00289987	0.948104	0.948264	0.0230705	0.00812495	0.850801	0.852067	0.069526	34.7107	37.2232	16.9421	15.4997	7.43802	7.18133	3.71901	4.06942	3.30579	2.63315	3.30579	13.6364	17.7686	4.18911	13.3453	19.6888	33.3333	34.8958	36.3636	39.2027	29.3103	35.1381	36.413	39.6867	242	1671	0.780572	0.964504	KLn	GAIN.LOSS	CDS	min10k.min00pr
Neurof_GoSynaptic__ALL	0.139828	0.580189	0.588617	0.230167	0.208751	0.439205	0.44973	0.347048	0.157521	0.553075	0.560292	0.251585	0.173133	0.511088	0.520086	0.283925	5.78512	4.60802	0.826446	0.478755	0	0.0598444	0	0.0598444	0	0	1.23967	1.65289	2.89256	0.478755	1.67564	2.45362	6.81818	4.55729	4.54545	4.65116	5.17241	3.8674	5.97826	5.48303	242	1671	0.780572	0.91474	KLn	GAIN.LOSS	CDS	min10k.min00pr
BspanHM_lg2rpkm3.21__ALL	0.0110364	0.869658	0.871508	0.0597287	0.0722364	0.450234	0.453969	0.342974	0.0187438	0.815843	0.816858	0.0878533	0.0279696	0.719491	0.723919	0.14031	30.5785	31.2986	11.9835	10.1137	2.47934	2.75284	1.65289	1.25673	0.826446	0.478755	3.71901	12.3967	14.4628	3.59066	12.2681	15.4399	31.0606	31.25	30	31.34	29.3103	28.3978	30.9783	34.7258	242	1671	0.780572	0.922496	KLn	GAIN.LOSS	CDS	min10k.min00pr
Neurof_GoNeuronBody__ALL	0.221421	0.598187	0.609348	0.215135	0.295327	0.492919	0.508963	0.293313	0.231239	0.586285	0.597841	0.223414	0.262596	0.538859	0.552792	0.257439	2.47934	1.97487	0	0.239378	0	0	0	0	0	0	0	0.826446	1.65289	0.299222	0.418911	1.25673	3.0303	2.08333	1.81818	1.88261	3.44828	2.32044	2.17391	1.56658	242	1671	0.81116	0.91474	KLn	GAIN.LOSS	CDS	min10k.min00pr
PSD_BayesGrant_fullset__ALL	0.0383026	0.809483	0.8112	0.0908721	0.101141	0.572413	0.576881	0.238914	0.0456837	0.784751	0.786202	0.104466	0.0544154	0.745353	0.747599	0.126331	13.2231	12.0287	1.65289	1.6158	0.413223	0.418911	0	0.179533	0	0.119689	1.65289	4.54545	7.02479	1.13704	4.54817	6.34351	11.3636	12.1094	15.4545	11.9601	8.62069	11.4917	14.6739	12.6632	242	1671	0.862042	0.922496	KLn	GAIN.LOSS	CDS	min10k.min00pr
Neurof_GoNervSysDev_CNS__ALL	0.0612477	0.776849	0.779648	0.108102	0.12093	0.604082	0.609999	0.214671	0.0723534	0.750556	0.753162	0.123112	0.0866921	0.703036	0.706852	0.150671	8.26446	7.36086	0.413223	0.777977	0	0.299222	0	0.119689	0	0.0598444	1.23967	2.47934	4.54545	1.01735	3.05206	3.29144	11.3636	6.64062	4.54545	7.97342	10.3448	7.18232	7.6087	7.5718	242	1671	0.862042	0.922496	KLn	GAIN.LOSS	CDS	min10k.min00pr
PhHs_NervSys_All__ALL	0.0244137	0.855007	0.855904	0.0675751	0.0742469	0.618539	0.622234	0.206046	0.0287643	0.835412	0.836373	0.0776	0.0370617	0.790542	0.792089	0.101226	16.5289	15.6792	2.47934	2.93238	0.826446	0.418911	0.413223	0.239378	0	0.239378	0.826446	7.02479	8.67769	0.95751	6.64273	8.07899	18.1818	15.3646	14.5455	15.9468	13.7931	15.0276	17.3913	16.4491	242	1671	0.862042	0.922496	KLn	GAIN.LOSS	CDS	min10k.min00pr
GI_q4__ALL	0.000603881	0.993759	0.993763	0.00271737	0.0491574	0.625111	0.627058	0.202692	0.00386332	0.964471	0.964504	0.0156959	0.013402	0.877204	0.877828	0.0565907	30.5785	30.7002	9.50413	9.21604	3.30579	2.51346	1.23967	0.897666	0.413223	0.5386	2.89256	12.8099	14.876	2.693	12.0287	15.9785	32.5758	28.5156	28.1818	32.5581	31.0345	28.9503	30.4348	32.7676	242	1671	0.862042	0.964504	KLn	GAIN.LOSS	CDS	min10k.min00pr
Kirov_NMDAR__ALL	0.254807	0.73021	0.739141	0.131273	0.369618	0.63744	0.650527	0.186735	0.304094	0.700295	0.708696	0.14954	0.344642	0.656597	0.66867	0.174788	0.826446	0.598444	0	0.0598444	0	0	0	0	0	0	0	0	0.826446	0.119689	0.239378	0.239378	0	0.520833	1.81818	0.664452	0	0.552486	1.08696	0.652742	242	1671	0.862042	0.922496	KLn	GAIN.LOSS	CDS	min10k.min00pr
GOP_lessthan500g__ALL	-0.0127128	0.644948	0.62941	-0.201067	0.0425303	0.659794	0.658156	0.181671	-0.0187671	0.576795	0.571492	-0.24299	-0.0119716	0.722853	0.717186	-0.144368	60.3306	64.8713	36.7769	39.2579	24.7934	23.2795	14.4628	14.4823	9.50413	9.69479	7.85124	25.2066	27.2727	6.82226	26.2717	31.7774	62.1212	66.1458	58.1818	63.7874	58.6207	61.989	60.8696	68.2768	242	1671	0.862042	0.91474	KLn	GAIN.LOSS	CDS	min10k.min00pr
GI_q3__ALL	-0.013485	0.863219	0.860716	-0.0651401	0.0392231	0.723835	0.724995	0.139665	-0.0143468	0.872402	0.871925	-0.0595207	-0.00135501	0.987834	0.987824	-0.00532032	28.5124	27.289	9.91736	8.43806	1.65289	2.51346	0	1.01735	0	0.359066	3.71901	13.2231	11.5702	3.11191	11.3106	12.8665	31.0606	26.6927	25.4545	27.7962	34.4828	27.1823	26.6304	27.4151	242	1671	0.862042	0.922496	KLn	GAIN.LOSS	CDS	min10k.min00pr
HI_q1__ALL	-0.0168527	0.780114	0.776643	-0.109779	0.0164706	0.84047	0.841255	0.0750725	-0.0172658	0.786239	0.783196	-0.10613	-0.0119828	0.851668	0.85021	-0.0704738	28.9256	31.9569	8.67769	11.55	3.71901	4.48833	2.06612	1.67564	1.65289	1.01735	4.13223	9.91736	14.876	3.05206	11.7295	17.1753	31.0606	30.3385	26.3636	33.3333	24.1379	31.8232	30.4348	32.1149	242	1671	0.903902	0.922496	KLn	GAIN.LOSS	CDS	min10k.min00pr
PhMm_Aggr_CardvascMuscle_all__ALL	-0.0212116	0.861951	0.860432	-0.0652834	0.0241514	0.868146	0.868455	0.0612527	-0.0212042	0.87298	0.872581	-0.0591941	-0.00587346	0.964799	0.964749	-0.0155857	20.2479	17.8336	2.47934	3.88989	0.826446	0.598444	0	0.239378	0	0.119689	2.47934	6.61157	11.157	2.09455	6.76242	8.97666	21.9697	17.1875	18.1818	18.3832	20.6897	15.3591	20.1087	20.7572	242	1671	0.903902	0.922496	KLn	GAIN.LOSS	CDS	min10k.min00pr
PhMm_Aggr_Sensory_all__ALL	-0.0262834	0.875648	0.874919	-0.0580324	0.019097	0.91766	0.91785	0.0372281	-0.0248899	0.886737	0.886319	-0.0524098	-0.0111139	0.94957	0.94948	-0.022514	11.9835	11.55	1.65289	2.03471	0	0.239378	0	0.119689	0	0.0598444	1.23967	4.95868	5.78512	1.0772	3.59066	6.88211	13.6364	10.9375	10	12.0709	15.5172	10.9392	10.8696	12.2715	242	1671	0.936207	0.922496	KLn	GAIN.LOSS	CDS	min10k.min00pr
BspanVHM_PreNat__ALL	-0.0344023	0.761042	0.756859	-0.120985	0.0031341	0.981407	0.981413	0.00814804	-0.0365552	0.761796	0.760165	-0.119092	-0.0255902	0.832471	0.83126	-0.080263	16.9421	18.1329	5.3719	4.3088	1.23967	1.19689	0.413223	0.418911	0	0.179533	0.826446	8.26446	7.85124	1.73549	7.89946	8.49791	19.697	18.4896	13.6364	17.8295	20.6897	17.3481	15.7609	19.0601	242	1671	0.981413	0.922496	KLn	GAIN.LOSS	CDS	min10k.min00pr
Neurof_KeggSynaptic__ALL	-0.116744	0.750867	0.746071	-0.12722	-0.0705868	0.853968	0.852751	-0.0691778	-0.117008	0.755661	0.752213	-0.123659	-0.0972954	0.796219	0.79357	-0.100415	3.30579	3.35129	0	0.179533	0	0.0598444	0	0.0598444	0	0	0	0.413223	2.89256	0.179533	1.31658	1.85518	2.27273	2.86458	4.54545	3.76523	3.44828	2.87293	3.26087	3.91645	242	1671	0.903902	0.922496	KLn	GAIN.LOSS	CDS	min10k.min00pr
PhMm_Aggr_SkeCranioLimbs_all__ALL	-0.0686178	0.661992	0.649343	-0.187526	-0.035236	0.835821	0.833204	-0.0792486	-0.0723277	0.660122	0.648917	-0.187811	-0.0588555	0.718939	0.710602	-0.148374	12.3967	13.9437	1.23967	1.97487	0.826446	0.299222	0	0.119689	0	0.119689	1.65289	4.54545	6.19835	1.19689	5.62537	7.12148	15.1515	11.849	9.09091	15.7254	18.9655	14.0331	10.3261	13.8381	242	1671	0.903902	0.919298	KLn	GAIN.LOSS	CDS	min10k.min00pr
BspanVHM_EqlNat__ALL	-0.0664104	0.572916	0.554746	-0.255905	-0.0401797	0.773335	0.772001	-0.112382	-0.0771129	0.53949	0.531261	-0.274692	-0.0624914	0.624366	0.61594	-0.210462	19.8347	20.8259	3.30579	4.60802	0.826446	1.25673	0.413223	0.299222	0.413223	0.119689	3.30579	6.19835	10.3306	2.39378	8.13884	10.2932	20.4545	20.1823	19.0909	21.3732	15.5172	19.6685	21.1957	22.1932	242	1671	0.874935	0.91474	KLn	GAIN.LOSS	CDS	min10k.min00pr
PhMm_Aggr_EndoExocrRepr_all__ALL	-0.0796823	0.54842	0.53788	-0.269315	-0.050705	0.746294	0.74505	-0.127814	-0.0915205	0.523703	0.517855	-0.285792	-0.0743161	0.600936	0.595658	-0.225003	16.9421	17.3549	3.71901	3.41113	0.413223	0.777977	0	0.119689	0	0.119689	2.89256	5.78512	8.26446	2.09455	6.4632	8.79713	21.2121	16.5365	11.8182	18.0509	13.7931	15.3591	17.9348	19.7128	242	1671	0.863581	0.91474	KLn	GAIN.LOSS	CDS	min10k.min00pr
PhMm_Aggr_DigestHepato_all__ALL	-0.0874302	0.572096	0.560212	-0.251648	-0.0590852	0.728884	0.72682	-0.138573	-0.0922734	0.562148	0.555484	-0.255328	-0.0804519	0.617563	0.611227	-0.213797	11.9835	14.4225	2.89256	2.693	0.413223	0.359066	0	0.119689	0	0.0598444	0.413223	4.13223	7.43802	1.73549	4.96709	7.71993	14.3939	12.5	9.09091	16.0576	17.2414	14.2541	10.3261	14.6214	242	1671	0.862042	0.91474	KLn	GAIN.LOSS	CDS	min10k.min00pr
PhHs_MindFun_ADX__ALL	-0.341385	0.652585	0.638644	-0.194741	-0.272159	0.722983	0.714376	-0.146073	-0.340938	0.656012	0.642609	-0.192053	-0.318377	0.675943	0.663965	-0.177855	0.826446	1.13704	0	0	0	0	0	0	0	0	0.413223	0.413223	0	0.239378	0.239378	0.658288	0	1.17188	1.81818	1.10742	0	1.10497	1.08696	1.17493	242	1671	0.862042	0.919298	KLn	GAIN.LOSS	CDS	min10k.min00pr
PhHs_MindFun_All__ALL	-0.147962	0.596928	0.58949	-0.229523	-0.11313	0.694624	0.690696	-0.160713	-0.147949	0.59992	0.592829	-0.227071	-0.142095	0.614878	0.608281	-0.215896	4.95868	6.34351	0.826446	0.478755	0	0	0	0	0	0	0.413223	1.65289	2.89256	0.478755	1.85518	4.00958	3.0303	6.51042	7.27273	6.20155	3.44828	6.29834	5.43478	6.39687	242	1671	0.862042	0.91474	KLn	GAIN.LOSS	CDS	min10k.min00pr
PhMm_Aggr_IntegAdipPigm_all__ALL	-0.0901297	0.544391	0.534238	-0.272265	-0.0646531	0.689151	0.686426	-0.163406	-0.096086	0.534218	0.527596	-0.277698	-0.084109	0.588216	0.582189	-0.234936	15.7025	14.3028	0.826446	3.35129	0	0.5386	0	0.179533	0	0.0598444	2.89256	2.06612	10.7438	1.43627	4.96709	7.89946	17.4242	12.8906	13.6364	15.5039	20.6897	13.5912	14.1304	15.1436	242	1671	0.862042	0.91474	KLn	GAIN.LOSS	CDS	min10k.min00pr
SynKEGG_GABAergic__ALL	-0.718338	0.4932	0.44918	-0.34758	-0.660704	0.530626	0.493068	-0.307093	-0.721699	0.494108	0.450932	-0.345889	-0.683604	0.515708	0.475629	-0.322732	0.413223	0.897666	0	0	0	0	0	0	0	0	0	0.413223	0	0.0598444	0.418911	0.418911	0.757576	0.78125	0	0.996678	0	0.994475	0.543478	0.78329	242	1671	0.81116	0.91474	KLn	GAIN.LOSS	CDS	min10k.min00pr
SynKEGG_Glutamatergic__ALL	-0.748046	0.466784	0.413521	-0.383502	-0.701429	0.502157	0.45916	-0.338036	-0.757162	0.462788	0.413202	-0.383837	-0.730294	0.482046	0.434295	-0.362215	0.413223	0.837822	0	0.0598444	0	0	0	0	0	0	0	0	0.413223	0.119689	0.359066	0.359066	0	0.520833	0.909091	1.10742	0	0.662983	0.543478	1.04439	242	1671	0.780572	0.91474	KLn	GAIN.LOSS	CDS	min10k.min00pr
HI_q3__ALL	-0.109552	0.255963	0.226872	-0.64422	-0.120065	0.305297	0.297468	-0.526559	-0.12443	0.213355	0.194716	-0.710598	-0.114811	0.262569	0.243086	-0.61424	27.686	30.0419	7.02479	8.19868	2.89256	2.27409	0.826446	0.777977	0	0.359066	3.30579	11.157	13.2231	3.41113	12.2681	14.3627	31.0606	29.0365	23.6364	30.897	24.1379	26.7403	28.8043	33.9426	242	1671	0.720187	0.716673	KLn	GAIN.LOSS	CDS	min10k.min00pr
SynKEGG_Serotonergic__ALL	-1.04642	0.311925	0.23768	-0.624007	-1.00823	0.331011	0.259961	-0.585093	-1.05042	0.311785	0.238172	-0.623108	-1.0314	0.319367	0.246387	-0.608382	0.413223	1.31658	0	0	0	0	0	0	0	0	0	0	0.413223	0.0598444	0.478755	0.777977	0	1.17188	0.909091	1.43965	0	1.54696	0.543478	1.04439	242	1671	0.710463	0.759175	KLn	GAIN.LOSS	CDS	min10k.min00pr
HI_q4__ALL	-0.149248	0.170352	0.148793	-0.827418	-0.15903	0.199345	0.190755	-0.719523	-0.168145	0.1388	0.12492	-0.903369	-0.161367	0.164269	0.148525	-0.828199	21.4876	25.4937	5.3719	6.52304	1.65289	2.21424	0.826446	0.718133	0.413223	0.299222	2.89256	8.67769	9.91736	3.05206	10.7121	11.7295	23.4848	24.2188	19.0909	26.5781	18.9655	22.9834	22.2826	28.4595	242	1671	0.608032	0.661168	KLn	GAIN.LOSS	CDS	min10k.min00pr
SynKEGG_Dopaminergic__ALL	-1.18816	0.237265	0.144533	-0.840034	-1.15398	0.254397	0.166472	-0.778659	-1.20071	0.232255	0.142605	-0.845865	-1.17739	0.243327	0.153104	-0.815012	0.413223	1.25673	0	0.119689	0	0	0	0	0	0	0	0	0.413223	0.0598444	0.5386	0.658288	0.757576	1.04167	0	1.43965	1.72414	0.883978	0	1.69713	242	1671	0.586132	0.661168	KLn	GAIN.LOSS	CDS	min10k.min00pr
PhMm_Aggr_HematoImmune_all__ALL	-0.189746	0.147857	0.124781	-0.903853	-0.19944	0.171595	0.15946	-0.79735	-0.202165	0.129181	0.11181	-0.951518	-0.197181	0.146942	0.129029	-0.889314	18.595	19.8683	2.06612	5.56553	0.413223	1.55595	0	0.598444	0	0.179533	2.06612	5.3719	11.157	1.91502	7.48055	10.4728	18.9394	17.4479	18.1818	21.9269	15.5172	19.0055	19.5652	20.8877	242	1671	0.586132	0.661168	KLn	GAIN.LOSS	CDS	min10k.min00pr
Neurof_PathwaysAxonG__ALL	-0.897845	0.125058	0.0719908	-1.14272	-0.87886	0.136748	0.0862766	-1.06411	-0.907909	0.120566	0.0701451	-1.154	-0.891473	0.129155	0.0773466	-1.11156	1.23967	2.99222	0	0.418911	0	0.119689	0	0	0	0	0.413223	0.413223	0.413223	0.5386	1.13704	1.31658	2.27273	2.47396	0	3.433	1.72414	2.87293	1.08696	3.13316	242	1671	0.488901	0.596234	KLn	GAIN.LOSS	CDS	min10k.min00pr
GI_q2__ALL	-0.192539	0.068538	0.0482063	-1.3169	-0.246099	0.0526528	0.0432089	-1.36443	-0.213501	0.0506463	0.0353943	-1.45107	-0.210174	0.0608908	0.0454135	-1.34282	17.7686	26.6308	5.78512	7.60024	2.06612	2.27409	1.65289	1.19689	0.826446	0.718133	3.71901	5.78512	8.26446	2.693	12.2681	11.6697	16.6667	27.0833	19.0909	26.2458	17.2414	25.7459	17.9348	27.6762	242	1671	0.314808	0.429979	KLn	GAIN.LOSS	CDS	min10k.min00pr
BspanML_lg2rpkm0.93__ALL	-0.149098	0.0615223	0.0471961	-1.32609	-0.194773	0.0454047	0.0405859	-1.39162	-0.162551	0.0465487	0.0369266	-1.43266	-0.163723	0.0536134	0.0430283	-1.36625	33.4711	38.7193	9.50413	13.8241	4.54545	5.80491	1.65289	2.03471	0.413223	1.0772	4.54545	13.6364	15.2893	3.83004	14.9013	19.988	34.8485	37.3698	31.8182	39.8671	29.3103	37.4586	34.7826	40.2089	242	1671	0.314808	0.429979	KLn	GAIN.LOSS	CDS	min10k.min00pr
SynKEGG_Cholinergic__ALL	-14.621	0.974917	0.0082138	-2.08546	-14.588	0.974845	0.00968823	-2.01376	-14.6315	0.974978	0.00806161	-2.09358	-14.608	0.974846	0.00877265	-2.05687	0	1.37642	0	0.0598444	0	0	0	0	0	0	0	0	0	0.119689	0.837822	0.418911	0	1.17188	0	1.55039	0	0.994475	0	1.82768	242	1671	0.24705	0.411142	KLn	GAIN.LOSS	CDS	min10k.min00pr
PSD_BayesGrant_fullset__LOSS	1.26711	0.0158428	0.0252663	1.59746	1.4849	0.00859746	0.014008	1.85362	1.29857	0.0142422	0.0228419	1.64127	1.24942	0.0189952	0.0286077	1.54352	2.48963	0.783133	0	0	0	0	0	0	0	0	0	0.829876	1.65975	0	0.180723	0.60241	2.29008	0.39267	2.72727	1.11607	3.50877	0.776915	2.17391	0.790514	241	1660	0.343196	0.743559	KLy	LOSS	In.Transcript.Hit.CDS	min15k.min10pr
FMR1_Targets_Darnell__LOSS	0.512786	0.129055	0.168082	0.77448	0.843231	0.046498	0.0616754	1.20989	0.613146	0.0783125	0.111544	0.952555	0.662984	0.0622315	0.0945582	1.0243	3.3195	1.44578	0	0.180723	0	0.060241	0	0.060241	0	0	0	0.829876	2.48963	0.301205	0.542169	0.60241	3.81679	1.70157	2.72727	1.22768	3.50877	1.33185	3.26087	1.58103	241	1660	0.811806	0.884645	KLy	LOSS	CDS	min15k.min10pr
PhMm_NeuroUnion_all__LOSS	0.0891703	0.431083	0.474841	0.323452	0.389939	0.0806644	0.087468	1.05815	0.287322	0.13676	0.151121	0.820675	0.267091	0.16165	0.182803	0.738016	11.2033	8.07229	0.829876	0.903614	0.414938	0.180723	0	0.120482	0	0.060241	0.414938	3.3195	7.46888	0.542169	2.40964	5.12048	13.7405	7.32984	8.18182	8.70536	14.0351	7.43618	10.3261	8.8274	241	1660	0.811806	0.884645	KLy	LOSS	CDS	min15k.min10pr
Neurof_UnionInclusive__LOSS	0.0722786	0.53902	0.577744	0.238264	0.406318	0.108411	0.116261	0.934566	0.290924	0.169315	0.191173	0.718574	0.273948	0.18725	0.221827	0.653986	8.71369	6.3253	0.829876	0.60241	0	0.301205	0	0.120482	0	0.120482	0.414938	2.90456	5.39419	0.361446	1.80723	4.15663	9.16031	6.80628	8.18182	5.91518	8.77193	6.10433	8.69565	6.58762	241	1660	0.811806	0.884645	KLy	LOSS	CDS	min15k.min10pr
Neurof_GoNervTransm__LOSS	0.251362	0.380621	0.421368	0.375338	0.605332	0.142897	0.163925	0.785355	0.552848	0.166477	0.189259	0.722944	0.54296	0.174618	0.197784	0.703809	2.90456	1.74699	0.414938	0.120482	0	0.060241	0	0.060241	0	0.060241	0.414938	1.24481	1.24481	0.180723	0.722892	0.843373	3.81679	1.70157	1.81818	1.78571	3.50877	1.44284	2.71739	2.10804	241	1660	0.811806	0.884645	KLy	LOSS	CDS	min15k.min10pr
PhMm_NervSystem_all__LOSS	0.0737967	0.580195	0.612609	0.212816	0.368909	0.156528	0.16743	0.776168	0.285891	0.218238	0.23517	0.628618	0.268673	0.238876	0.263135	0.579822	7.46888	5.72289	0.829876	0.60241	0.414938	0.120482	0	0.060241	0	0.060241	0.414938	2.48963	4.56432	0.421687	2.16867	3.13253	8.39695	5.75916	6.36364	5.69196	7.01754	5.10544	7.6087	6.45586	241	1660	0.811806	0.884645	KLy	LOSS	CDS	min15k.min10pr
Kirov_ARC__LOSS	2.09368	0.1753	0.195971	0.707808	2.11781	0.171887	0.192355	0.715897	2.10707	0.171915	0.192951	0.714553	2.05745	0.180178	0.201231	0.696306	0.414938	0.060241	0	0	0	0	0	0	0	0	0	0	0.414938	0	0	0.060241	0.763359	0	0	0.111607	0	0.110988	0.543478	0	241	1660	0.811806	0.884645	KLy	LOSS	CDS	min15k.min10pr
Neurof_GoNeuronProj__LOSS	0.106216	0.631673	0.660008	0.180451	0.525373	0.200769	0.220565	0.656464	0.408549	0.256366	0.288237	0.54025	0.355721	0.327241	0.359748	0.444001	3.3195	2.22892	0	0.240964	0	0.180723	0	0.060241	0	0.060241	0.414938	1.24481	1.65975	0.240964	0.421687	1.56627	3.05344	1.96335	3.63636	2.45536	5.26316	2.33074	2.71739	2.10804	241	1660	0.811806	0.884645	KLy	LOSS	CDS	min15k.min10pr
PSD_BayesGrant_fullset__LOSS	0.149854	0.524606	0.549957	0.259671	0.37233	0.244309	0.264508	0.577562	0.278049	0.326717	0.354017	0.450976	0.245399	0.397053	0.41883	0.377962	4.97925	2.95181	0	0.301205	0	0.240964	0	0.180723	0	0.060241	0	0.829876	4.14938	0.180723	0.783133	1.98795	3.81679	2.6178	6.36364	3.23661	3.50877	2.33074	5.43478	3.68906	241	1660	0.811806	0.884645	KLy	LOSS	CDS	min15k.min10pr
PhMm_NeuroBehav_all__LOSS	0.0860204	0.610922	0.634585	0.19751	0.305223	0.26059	0.271257	0.56662	0.248432	0.322422	0.335941	0.473737	0.231449	0.361456	0.374479	0.426573	7.88382	5.60241	0	0.361446	0	0.120482	0	0.060241	0	0.060241	0.414938	2.07469	5.39419	0.481928	1.44578	3.6747	9.16031	4.84293	6.36364	6.25	7.01754	5.21643	8.15217	6.06061	241	1660	0.811806	0.884645	KLy	LOSS	CDS	min15k.min10pr
PhHs_NervSys_All__LOSS	0.156202	0.527083	0.53924	0.268218	0.317336	0.284741	0.296108	0.52855	0.255628	0.353991	0.365463	0.437156	0.227288	0.410901	0.420896	0.375825	6.639	5.3012	0.414938	0.301205	0	0.060241	0	0.060241	0	0.060241	0.414938	0.829876	5.39419	0.301205	1.92771	3.07229	6.87023	4.97382	6.36364	5.58036	5.26316	4.88346	7.06522	5.7971	241	1660	0.811806	0.884645	KLy	LOSS	CDS	min15k.min10pr
PhMm_Aggr_IntegAdipPigm_all__LOSS	0.11103	0.567503	0.593977	0.22623	0.310318	0.284527	0.296995	0.527251	0.272314	0.324843	0.340486	0.467901	0.243086	0.384886	0.398483	0.39959	6.22407	4.39759	0	0.361446	0	0.060241	0	0.060241	0	0.060241	0	0.829876	5.39419	0.240964	1.08434	3.07229	8.39695	3.79581	3.63636	4.91071	8.77193	4.32852	5.43478	4.47958	241	1660	0.811806	0.884645	KLy	LOSS	CDS	min15k.min10pr
BspanVHM_PstNat__LOSS	0.0375239	0.768501	0.780154	0.107819	0.240693	0.284899	0.300602	0.522008	0.138722	0.435209	0.461472	0.335855	0.125327	0.508051	0.52792	0.277432	7.88382	6.20482	1.65975	0.963855	0	0.301205	0	0.180723	0	0.180723	0.414938	2.07469	5.39419	0.361446	1.74699	4.09639	6.87023	7.19895	9.09091	5.35714	8.77193	5.21643	7.6087	7.37813	241	1660	0.811806	0.884645	KLy	LOSS	CDS	min15k.min10pr
PhMm_CompleteLethality__LOSS	0.367735	0.425798	0.447976	0.348745	0.521869	0.295464	0.319228	0.495899	0.449409	0.346948	0.371554	0.429979	0.406145	0.402354	0.422724	0.373943	2.07469	1.26506	0	0.180723	0	0	0	0	0	0	0	0	2.07469	0.120482	0.240964	0.903614	2.29008	0.78534	1.81818	1.67411	5.26316	0.99889	1.08696	1.58103	241	1660	0.811806	0.884645	KLy	LOSS	CDS	min15k.min10pr
Neurof_KeggSynaptic__LOSS	0.280464	0.565913	0.595899	0.224827	0.710419	0.298366	0.326308	0.486373	0.67548	0.313323	0.343421	0.464173	0.606807	0.374792	0.400127	0.397802	1.24481	0.843373	0	0.060241	0	0.060241	0	0.060241	0	0	0	0	1.24481	0.180723	0.120482	0.542169	0.763359	0.91623	1.81818	0.78125	0	1.22087	1.63043	0.395257	241	1660	0.811806	0.884645	KLy	LOSS	CDS	min15k.min10pr
PhMm_Aggr_HematoImmune_all__LOSS	0.0442638	0.769134	0.78167	0.106977	0.266441	0.324378	0.334429	0.475696	0.202227	0.40942	0.422824	0.37384	0.183807	0.457685	0.470984	0.326994	7.05394	5.66265	0.829876	0.361446	0	0.120482	0	0.060241	0	0.060241	0	0.414938	6.639	0.301205	1.74699	3.61446	7.63359	5.49738	6.36364	5.80357	3.50877	4.99445	8.15217	6.45586	241	1660	0.811806	0.884645	KLy	LOSS	CDS	min15k.min10pr
Neurof_GoNervSysDev__LOSS	0.0612911	0.754703	0.768252	0.114497	0.310829	0.346499	0.360399	0.443217	0.258423	0.396939	0.415126	0.38182	0.205771	0.508373	0.521639	0.28263	4.56432	4.03614	0.414938	0.301205	0	0.180723	0	0.060241	0	0.060241	0.414938	1.65975	2.48963	0.301205	0.963855	2.77108	3.81679	3.9267	5.45455	4.12946	1.75439	4.43951	5.43478	3.55731	241	1660	0.811806	0.884645	KLy	LOSS	CDS	min15k.min10pr
Neurof_GoSynaptic__LOSS	0.181691	0.654079	0.668896	0.174642	0.40088	0.420069	0.439524	0.357018	0.322692	0.485197	0.507012	0.294982	0.315253	0.507059	0.526208	0.278843	2.07469	1.26506	0	0.240964	0	0.120482	0	0.060241	0	0	0	0.829876	1.24481	0.180723	0.180723	0.903614	2.29008	1.3089	1.81818	1.22768	1.75439	1.10988	2.17391	1.44928	241	1660	0.811806	0.884645	KLy	LOSS	CDS	min15k.min10pr
HI_q3__LOSS	-0.000213486	0.998478	0.998477	-0.000661895	0.158408	0.454677	0.457804	0.33932	0.0870422	0.596689	0.605756	0.217702	0.0765263	0.649333	0.656049	0.183064	10.3734	10.3012	2.48963	1.62651	0.414938	0.180723	0.414938	0.120482	0.414938	0.120482	0.414938	3.3195	6.639	0.903614	3.07229	6.3253	10.687	10.4712	10	10.1562	7.01754	8.87902	11.413	11.9895	241	1660	0.811806	0.884645	KLy	LOSS	CDS	min15k.min10pr
GOP_lessthan500g__LOSS	-0.0180885	0.737443	0.702129	-0.153583	0.143905	0.474385	0.469458	0.328403	0.00716467	0.919707	0.920121	0.0361551	-0.00355494	0.961378	0.961302	-0.0171403	30.2905	28.494	8.29876	9.57831	4.14938	3.61446	1.24481	1.74699	0.414938	1.38554	1.24481	7.05394	21.9917	1.26506	8.07229	19.1566	31.2977	31.0209	29.0909	26.3393	28.0702	25.6382	30.9783	31.8841	241	1660	0.811806	0.962795	KLy	LOSS	CDS	min15k.min10pr
Neurof_UnionStringent__LOSS	0.0305918	0.902526	0.905427	0.0431465	0.298677	0.472871	0.487302	0.312202	0.230472	0.543483	0.56102	0.251021	0.169122	0.666254	0.675593	0.170315	2.90456	2.40964	0	0.301205	0	0.180723	0	0.060241	0	0.060241	0.414938	1.24481	1.24481	0.240964	0.481928	1.68675	3.05344	1.96335	2.72727	2.79018	3.50877	2.66371	2.71739	2.10804	241	1660	0.811806	0.884645	KLy	LOSS	CDS	min15k.min10pr
GI_q1__LOSS	0.00192025	0.985275	0.985292	0.00643488	0.101888	0.519927	0.521035	0.283133	0.0370121	0.746768	0.750026	0.124923	0.0283965	0.802232	0.804446	0.0945029	15.3527	14.2169	2.07469	2.89157	0.414938	0.783133	0.414938	0.60241	0.414938	0.240964	1.24481	1.65975	12.4481	0.963855	3.37349	9.87952	16.7939	15.7068	13.6364	12.9464	7.01754	13.8735	17.9348	14.6245	241	1660	0.811806	0.929849	KLy	LOSS	CDS	min15k.min10pr
FMR1_Targets_Ascano__LOSS	0.0855912	0.813305	0.817453	0.087537	0.271467	0.540274	0.550326	0.25938	0.23155	0.586585	0.595417	0.225179	0.220355	0.603507	0.611751	0.213425	2.48963	2.53012	0.414938	0.060241	0	0.060241	0	0.060241	0	0.060241	0	0	2.48963	0.361446	0.722892	1.44578	2.29008	2.74869	2.72727	2.34375	1.75439	2.66371	2.71739	2.37154	241	1660	0.811806	0.884645	KLy	LOSS	CDS	min15k.min10pr
BspanVH_lg2rpkm4.74__LOSS	-0.00648586	0.956386	0.955593	-0.019727	0.114503	0.54029	0.567858	0.245761	0.0534923	0.717112	0.735933	0.133162	0.0522505	0.749703	0.764504	0.11662	7.05394	5.90361	0.829876	0.783133	0	0.301205	0	0.240964	0	0.180723	0.414938	2.48963	4.14938	0.542169	1.92771	3.43373	6.10687	7.06806	8.18182	4.91071	8.77193	5.99334	6.52174	5.7971	241	1660	0.811806	0.929849	KLy	LOSS	CDS	min15k.min10pr
PhHs_MindFun_All__LOSS	0.115033	0.780529	0.783404	0.106014	0.213391	0.623543	0.630652	0.20021	0.181377	0.668184	0.674096	0.171278	0.14108	0.739887	0.743529	0.128702	2.90456	2.3494	0	0.120482	0	0	0	0	0	0	0.414938	0.414938	2.07469	0.120482	0.542169	1.68675	1.52672	1.96335	4.54545	2.67857	0	2.10877	3.80435	2.63505	241	1660	0.811806	0.92916	KLy	LOSS	CDS	min15k.min10pr
HI_q2__LOSS	-0.0267861	0.842555	0.835461	-0.0780736	0.107418	0.651883	0.653461	0.184781	0.0360225	0.836361	0.837754	0.0768835	0.0159979	0.928688	0.92892	0.0320218	12.0332	10.4217	0.829876	1.68675	0.414938	0.361446	0.414938	0.180723	0	0.120482	0.414938	2.48963	9.12863	0.662651	3.31325	6.44578	14.5038	12.1728	9.09091	8.92857	10.5263	9.101	12.5	11.9895	241	1660	0.811806	0.929849	KLy	LOSS	CDS	min15k.min10pr
PhMm_Aggr_DigestHepato_all__LOSS	0.00908609	0.966245	0.966504	0.0147966	0.130301	0.660753	0.665053	0.177144	0.100479	0.723971	0.727753	0.138016	0.0817367	0.776156	0.778497	0.108743	5.39419	5	0.414938	0.180723	0	0.120482	0	0.060241	0	0.060241	0	0.414938	4.97925	0.361446	0.963855	3.6747	5.34351	5.49738	5.45455	4.57589	7.01754	4.77248	4.8913	5.27009	241	1660	0.811806	0.929849	KLy	LOSS	CDS	min15k.min10pr
BspanHM_lg2rpkm3.21__LOSS	-0.0224374	0.860074	0.853459	-0.0688174	0.0697551	0.727001	0.728582	0.137521	0.0380377	0.82478	0.826049	0.082994	0.0224404	0.897824	0.898251	0.0466021	9.95851	9.93976	2.90456	1.50602	0.414938	0.542169	0	0.180723	0	0.060241	0	3.3195	6.639	0.783133	2.77108	6.38554	9.16031	10.6021	10.9091	9.375	8.77193	8.43507	10.3261	11.726	241	1660	0.864133	0.929849	KLy	LOSS	CDS	min15k.min10pr
SynKEGG_Serotonergic__LOSS	0.182418	0.866339	0.869205	0.0608776	0.342131	0.757084	0.765872	0.115844	0.289683	0.791552	0.798239	0.0978672	0.29208	0.791807	0.7983	0.0978341	0.414938	0.542169	0	0	0	0	0	0	0	0	0	0	0.414938	0.120482	0.060241	0.361446	0	0.52356	0.909091	0.558036	0	0.887902	0.543478	0.131752	241	1660	0.887715	0.929849	KLy	LOSS	CDS	min15k.min10pr
Neurof_GoNeuronBody__LOSS	0.116747	0.915792	0.916862	0.0376961	0.315716	0.783241	0.789372	0.102718	0.234058	0.83481	0.838687	0.0764001	0.184411	0.869777	0.872157	0.0594053	0.414938	0.421687	0	0	0	0	0	0	0	0	0	0	0.414938	0.120482	0.060241	0.240964	0	0.52356	0.909091	0.334821	0	0.554939	0.543478	0.263505	241	1660	0.894622	0.929849	KLy	LOSS	CDS	min15k.min10pr
BspanVHM_PreNat__LOSS	-0.0476071	0.817	0.808234	-0.0924627	0.0529822	0.851905	0.85275	0.069178	0.019146	0.938473	0.938798	0.027428	0.0203881	0.936111	0.936414	0.0285323	5.80913	5.06024	0.414938	0.662651	0	0.180723	0	0.180723	0	0.120482	0	2.48963	3.3195	0.421687	1.44578	3.19277	5.34351	5.62827	6.36364	4.57589	7.01754	4.5505	5.43478	5.66535	241	1660	0.909939	0.962795	KLy	LOSS	CDS	min15k.min10pr
HI_q1__LOSS	-0.0471083	0.720575	0.712828	-0.147015	0.0117141	0.949231	0.949276	0.0226076	-0.0155992	0.913458	0.913087	-0.039488	-0.0226533	0.874222	0.873404	-0.0587848	11.6183	11.1446	1.65975	3.13253	0.414938	0.963855	0.414938	0.361446	0.414938	0.180723	0.829876	2.07469	8.71369	0.542169	2.95181	7.6506	12.2137	11.3874	10.9091	10.9375	8.77193	11.8757	12.5	10.2767	241	1660	0.968261	0.962795	KLy	LOSS	CDS	min15k.min10pr
BspanLA_lg2rpkm.MIN__LOSS	-0.0390759	0.69516	0.684527	-0.16461	0.00393426	0.977839	0.977855	0.0097254	-0.00680145	0.952004	0.951879	-0.0214183	-0.0208289	0.850744	0.849425	-0.070875	16.1826	13.1928	2.48963	3.85542	1.24481	1.26506	0.414938	0.843373	0	0.60241	0.829876	3.3195	12.0332	0.903614	3.91566	8.37349	15.2672	13.4817	17.2727	12.9464	14.0351	12.2087	16.8478	14.361	241	1660	0.977855	0.962795	KLy	LOSS	CDS	min15k.min10pr
SynKEGG_GABAergic__LOSS	-9.97745	0.97549	0.703599	-0.152675	-7.2834	0.982109	0.922974	-0.0348107	-5.77013	0.985827	0.962795	-0.0164662	-4.12943	0.989855	0.983536	-0.00720956	0	0.060241	0	0	0	0	0	0	0	0	0	0	0	0.060241	0	0	0	0.13089	0	0	0	0.110988	0	0	241	1660	0.960646	0.962795	KLy	LOSS	CDS	min15k.min10pr
BspanVHM_EqlNat__LOSS	-0.114585	0.659214	0.610213	-0.214518	-0.0571906	0.85744	0.856413	-0.0673167	-0.0632175	0.829451	0.827596	-0.0821815	-0.0868314	0.771598	0.768905	-0.114127	5.39419	5.48193	0	0.542169	0	0.180723	0	0.120482	0	0.060241	0	1.24481	4.14938	0.542169	1.74699	3.19277	6.10687	5.10471	4.54545	5.80357	3.50877	5.21643	5.97826	5.7971	241	1660	0.909939	0.929849	KLy	LOSS	CDS	min15k.min10pr
Neurof_GoNervSysDev_CNS__LOSS	-0.173638	0.710577	0.703203	-0.15292	-0.103486	0.833882	0.832011	-0.0798708	-0.113008	0.815695	0.813241	-0.0897809	-0.167682	0.730293	0.725154	-0.13957	2.07469	2.53012	0	0.120482	0	0.060241	0	0	0	0	0	0.414938	1.65975	0.180723	0.722892	1.62651	2.29008	2.74869	1.81818	2.34375	1.75439	2.77469	2.17391	2.23979	241	1660	0.909939	0.929849	KLy	LOSS	CDS	min15k.min10pr
GI_q3__LOSS	-0.126404	0.543029	0.480766	-0.318066	-0.102604	0.674219	0.668546	-0.174869	-0.102963	0.635442	0.624455	-0.204499	-0.109122	0.624789	0.6155	-0.210772	6.639	7.71084	1.24481	1.3253	0	0.301205	0	0.120482	0	0.120482	0	2.07469	4.56432	0.542169	2.3494	4.81928	7.63359	8.11518	5.45455	7.36607	10.5263	7.65816	5.43478	7.77339	241	1660	0.811806	0.884645	KLy	LOSS	CDS	min15k.min10pr
GI_q2__LOSS	-0.134699	0.513616	0.458255	-0.338893	-0.116069	0.645984	0.642328	-0.192243	-0.10623	0.626554	0.621343	-0.206669	-0.112021	0.612101	0.606873	-0.216902	7.05394	9.03614	2.07469	1.08434	0.414938	0.120482	0	0.120482	0	0.060241	0.414938	1.24481	5.39419	0.662651	3.43373	4.93976	8.39695	10.4712	5.45455	7.8125	5.26316	7.88013	7.6087	10.4084	241	1660	0.811806	0.884645	KLy	LOSS	CDS	min15k.min10pr
GI_q4__LOSS	-0.126396	0.495951	0.454597	-0.342373	-0.10604	0.626126	0.622437	-0.205905	-0.102702	0.59974	0.59246	-0.227341	-0.12307	0.534123	0.524574	-0.280194	9.95851	10.9036	1.24481	1.68675	0	0.240964	0	0.180723	0	0.180723	0.414938	2.48963	7.05394	0.60241	3.49398	6.80723	11.4504	11.1257	8.18182	10.7143	10.5263	10.4329	9.78261	11.4625	241	1660	0.811806	0.884645	KLy	LOSS	CDS	min15k.min10pr
PhHs_NervSys_ADX__LOSS	-0.437623	0.541539	0.512828	-0.290028	-0.351593	0.634433	0.617289	-0.209511	-0.367741	0.609506	0.588727	-0.230086	-0.40686	0.573634	0.549413	-0.260101	0.829876	1.14458	0	0.120482	0	0	0	0	0	0	0.414938	0	0.414938	0.180723	0.361446	0.60241	0.763359	0.65445	0.909091	1.5625	0	0.887902	1.08696	1.44928	241	1660	0.811806	0.884645	KLy	LOSS	CDS	min15k.min10pr
PhMm_Aggr_Sensory_all__LOSS	-0.22801	0.500762	0.476204	-0.322207	-0.183117	0.622734	0.61601	-0.210412	-0.192968	0.584739	0.575408	-0.240024	-0.211521	0.550388	0.539646	-0.267891	3.73444	4.09639	0	0.240964	0	0.060241	0	0.060241	0	0.060241	0.414938	0.414938	2.90456	0.180723	1.3253	2.59036	5.34351	4.31937	1.81818	3.90625	3.50877	3.6626	3.80435	4.61133	241	1660	0.811806	0.884645	KLy	LOSS	CDS	min15k.min10pr
SynKEGG_Glutamatergic__LOSS	-11.1026	0.975815	0.480718	-0.318109	-10.8895	0.975455	0.575825	-0.23971	-10.9133	0.974591	0.562266	-0.250059	-10.6261	0.974159	0.600303	-0.221629	0	0.240964	0	0.060241	0	0	0	0	0	0	0	0	0	0.120482	0.060241	0.060241	0	0.26178	0	0.223214	0	0.443951	0	0	241	1660	0.811806	0.884645	KLy	LOSS	CDS	min15k.min10pr
SynKEGG_Dopaminergic__LOSS	-11.2207	0.975597	0.46296	-0.334457	-11.0812	0.974828	0.535769	-0.271022	-11.0394	0.974141	0.535547	-0.271202	-11.003	0.972613	0.520332	-0.28372	0	0.240964	0	0.060241	0	0	0	0	0	0	0	0	0	0.060241	0.060241	0.120482	0	0.39267	0	0.111607	0	0.443951	0	0	241	1660	0.811806	0.884645	KLy	LOSS	CDS	min15k.min10pr
BspanML_lg2rpkm0.93__LOSS	-0.113768	0.421663	0.38227	-0.41763	-0.115154	0.52303	0.520743	-0.283377	-0.0938877	0.533437	0.524889	-0.279933	-0.0993319	0.511407	0.500677	-0.300442	11.6183	15.1205	1.65975	3.07229	0.829876	0.783133	0.829876	0.180723	0.414938	0.060241	0.829876	1.65975	9.12863	0.843373	4.33735	9.93976	15.2672	15.7068	7.27273	14.6205	5.26316	14.8724	13.587	15.415	241	1660	0.811806	0.884645	KLy	LOSS	CDS	min15k.min10pr
Kirov_NMDAR__LOSS	-11.6559	0.971942	0.351248	-0.454386	-11.4881	0.970998	0.409665	-0.387572	-11.4931	0.970269	0.398851	-0.399189	-12.3178	0.979644	0.416669	-0.380209	0	0.301205	0	0.060241	0	0	0	0	0	0	0	0	0	0.120482	0.060241	0.120482	0	0.26178	0	0.334821	0	0.443951	0	0.131752	241	1660	0.811806	0.884645	KLy	LOSS	CDS	min15k.min10pr
PhMm_Aggr_CardvascMuscle_all__LOSS	-0.277415	0.33123	0.287531	-0.541315	-0.266078	0.387872	0.374143	-0.426962	-0.254101	0.383523	0.36719	-0.435109	-0.280109	0.340758	0.323072	-0.490701	4.97925	5.96386	0.414938	0.60241	0	0.060241	0	0.060241	0	0.060241	0.414938	0.829876	3.73444	0.481928	1.80723	3.6747	6.10687	5.62827	3.63636	6.25	3.50877	4.88346	5.43478	7.24638	241	1660	0.811806	0.884645	KLy	LOSS	CDS	min15k.min10pr
SynKEGG_Cholinergic__LOSS	-12.7956	0.979703	0.292427	-0.533983	-12.6317	0.979258	0.348838	-0.457377	-12.6081	0.978799	0.343124	-0.464549	-12.4332	0.978069	0.362985	-0.440111	0	0.361446	0	0.060241	0	0	0	0	0	0	0	0	0	0.180723	0.120482	0.060241	0	0.39267	0	0.334821	0	0.554939	0	0.131752	241	1660	0.811806	0.884645	KLy	LOSS	CDS	min15k.min10pr
PhMm_Aggr_SkeCranioLimbs_all__LOSS	-0.425895	0.282341	0.244895	-0.61102	-0.403936	0.329929	0.308497	-0.510749	-0.391548	0.33342	0.309456	-0.5094	-0.4452	0.273679	0.247392	-0.606615	2.90456	4.39759	0	0.180723	0	0.060241	0	0.060241	0	0.060241	0	0.414938	2.48963	0.180723	1.20482	3.01205	4.58015	4.31937	0.909091	4.46429	3.50877	4.43951	2.71739	4.34783	241	1660	0.811806	0.884645	KLy	LOSS	CDS	min15k.min10pr
PhHs_MindFun_ADX__LOSS	-12.6536	0.973964	0.235653	-0.627728	-12.4484	0.97338	0.267988	-0.571885	-12.4157	0.972808	0.263582	-0.579084	-12.4284	0.971637	0.242715	-0.614904	0	0.301205	0	0	0	0	0	0	0	0	0	0	0	0.060241	0.060241	0.180723	0	0.26178	0	0.334821	0	0.221976	0	0.395257	241	1660	0.811806	0.884645	KLy	LOSS	CDS	min15k.min10pr
HI_q4__LOSS	-0.364871	0.188429	0.150702	-0.821881	-0.382842	0.205274	0.187627	-0.726706	-0.342502	0.229138	0.207706	-0.68255	-0.389633	0.174355	0.153252	-0.814593	5.39419	7.3494	0.414938	0.60241	0	0.180723	0	0.120482	0	0.060241	0.414938	0.829876	4.14938	0.481928	2.10843	4.75904	4.58015	7.8534	6.36364	6.91964	5.26316	6.43729	5.43478	8.43215	241	1660	0.811806	0.884645	KLy	LOSS	CDS	min15k.min10pr
Neurof_PathwaysAxonG__LOSS	-12.871	0.968027	0.0955362	-1.01983	-12.7932	0.967551	0.113127	-0.946433	-12.772	0.967365	0.112241	-0.949848	-13.7799	0.977819	0.0974333	-1.01129	0	0.783133	0	0.120482	0	0.060241	0	0	0	0	0	0	0	0.180723	0.240964	0.361446	0	0.52356	0	1.00446	0	0.99889	0	0.527009	241	1660	0.811806	0.884645	KLy	LOSS	CDS	min15k.min10pr
PSD_BayesGrant_fullset__ALL	0.970512	0.0176822	0.0270439	1.56793	1.16474	0.00806935	0.0129319	1.88834	0.959204	0.0191478	0.0288352	1.54008	0.981943	0.0177519	0.0267318	1.57297	3.73444	1.62651	0	0	0	0	0	0	0	0	0	0.829876	2.90456	0	0.361446	1.26506	2.29008	1.43979	5.45455	1.78571	3.50877	1.88679	3.80435	1.31752	241	1660	0.141876	0.290625	KLy	GAIN.LOSS	In.Transcript.Hit.CDS	min15k.min10pr
PhMm_CompleteLethality__LOSS	1.00686	0.0598769	0.0918707	1.03682	1.60955	0.0183474	0.0274027	1.56221	1.30258	0.0280296	0.0474711	1.32357	1.30396	0.0305793	0.051559	1.2877	1.65975	0.421687	0	0.120482	0	0	0	0	0	0	0	0	1.65975	0.120482	0.120482	0.180723	1.52672	0.39267	1.81818	0.446429	3.50877	0.332963	1.08696	0.527009	241	1660	0.456712	0.761902	KLy	LOSS	Transcript	min15k.min10pr
Neurof_UnionInclusive__GAIN	0.186882	0.0482514	0.0580626	1.2361	0.247252	0.0513133	0.0532789	1.27345	0.141255	0.19539	0.201945	0.694767	0.209551	0.0527051	0.0577022	1.23881	21.1618	16.747	5.80913	4.03614	1.65975	1.20482	0.829876	0.301205	0.414938	0.180723	4.97925	7.88382	8.29876	2.89157	7.53012	6.3253	23.6641	14.5288	18.1818	18.6384	26.3158	16.6482	19.5652	16.8643	241	1660	0.457639	0.737263	KLy	GAIN	CDS	min15k.min10pr
Neurof_UnionStringent__GAIN	0.284228	0.0466257	0.0551689	1.25831	0.322882	0.0577634	0.0623422	1.20522	0.22073	0.169601	0.176822	0.752464	0.295371	0.0621474	0.0681127	1.16677	11.2033	7.46988	2.07469	1.20482	0.829876	0.301205	0.414938	0.180723	0.414938	0.060241	3.3195	4.14938	3.73444	1.50602	3.07229	2.89157	11.4504	6.41361	10.9091	8.37054	8.77193	7.10322	11.9565	7.90514	241	1660	0.457639	0.737263	KLy	GAIN	CDS	min15k.min10pr
Neurof_GoNeuronProj__GAIN	0.322097	0.0509287	0.0635932	1.19659	0.345816	0.0680115	0.0769653	1.1137	0.254513	0.150421	0.163181	0.78733	0.338513	0.0572274	0.0672711	1.17217	12.0332	7.89157	1.24481	0.963855	0.829876	0.301205	0	0.180723	0	0	3.3195	4.14938	4.56432	1.3253	2.89157	3.6747	11.4504	6.67539	12.7273	8.92857	8.77193	7.65816	13.0435	8.16864	241	1660	0.457639	0.737263	KLy	GAIN	CDS	min15k.min10pr
FMR1_Targets_Ascano__GAIN	0.326986	0.0743085	0.0876607	1.0572	0.348245	0.0978258	0.108168	0.965901	0.255878	0.18601	0.199008	0.701129	0.34053	0.080323	0.091727	1.0375	9.54357	7.6506	2.07469	0.843373	0.829876	0.180723	0	0	0	0	1.65975	5.39419	2.48963	1.38554	3.6747	2.59036	10.687	6.80628	8.18182	8.37054	14.0351	7.76915	8.15217	7.50988	241	1660	0.457639	0.737263	KLy	GAIN	CDS	min15k.min10pr
PhHs_NervSys_ADX__GAIN	0.33016	0.0739583	0.090134	1.04511	0.338792	0.10179	0.113671	0.944349	0.24255	0.239243	0.252174	0.598299	0.342114	0.0872941	0.0999877	1.00005	7.46888	5.36145	1.24481	0.421687	0.414938	0.240964	0.414938	0.180723	0.414938	0	1.24481	4.56432	1.65975	0.963855	2.22892	2.16867	9.92366	4.31937	4.54545	6.25	8.77193	5.21643	7.06522	5.5336	241	1660	0.457639	0.82469	KLy	GAIN	CDS	min15k.min10pr
GI_q4__GAIN	0.11744	0.102033	0.116943	0.932026	0.161108	0.114964	0.117825	0.928763	0.0801719	0.316488	0.326438	0.486199	0.135255	0.0976354	0.107957	0.966748	25.3112	22.1687	9.54357	6.62651	4.97925	2.28916	2.48963	1.20482	0.829876	0.542169	4.56432	11.6183	9.12863	3.01205	9.63855	9.51807	25.9542	17.801	24.5455	25.8929	28.0702	20.8657	24.4565	23.7154	241	1660	0.457639	0.876228	KLy	GAIN	CDS	min15k.min10pr
Neurof_GoNervTransm__GAIN	0.36889	0.0904149	0.0973148	1.01182	0.363844	0.117603	0.123308	0.909007	0.267862	0.271114	0.274897	0.56083	0.359039	0.133419	0.137546	0.861553	7.46888	4.6988	0.414938	0.361446	0.414938	0	0.414938	0	0.414938	0	2.48963	1.65975	3.3195	1.26506	1.80723	1.62651	7.63359	3.66492	7.27273	5.58036	8.77193	3.77358	7.06522	5.7971	241	1660	0.457639	0.82469	KLy	GAIN	CDS	min15k.min10pr
Kirov_ARC__GAIN	1.45537	0.108453	0.142178	0.847167	1.4431	0.111806	0.145471	0.837224	1.37767	0.132942	0.165631	0.780858	1.39218	0.131723	0.164556	0.783686	0.829876	0.240964	0	0	0	0	0	0	0	0	0	0	0.829876	0.060241	0.120482	0.060241	0	0.13089	1.81818	0.334821	0	0.332963	1.08696	0.131752	241	1660	0.457639	0.737263	KLy	GAIN	CDS	min15k.min10pr
Neurof_GoSynaptic__GAIN	0.399902	0.10381	0.116482	0.933741	0.396131	0.13778	0.148536	0.828167	0.2885	0.287323	0.295697	0.529154	0.388325	0.139771	0.150049	0.823767	4.97925	3.79518	1.24481	0.301205	0.414938	0	0.414938	0	0	0	1.65975	1.24481	2.07469	0.662651	1.68675	1.44578	5.34351	3.53403	4.54545	4.01786	5.26316	3.6626	4.8913	3.95257	241	1660	0.457639	0.837807	KLy	GAIN	CDS	min15k.min10pr
BspanVHM_PstNat__GAIN	0.124406	0.130135	0.146027	0.835568	0.173674	0.1525	0.152546	0.816598	0.0819566	0.364004	0.37317	0.428093	0.125746	0.15966	0.171077	0.766808	17.4274	14.6386	6.22407	4.51807	2.48963	1.56627	2.07469	0.542169	1.24481	0.421687	4.56432	7.88382	4.97925	2.46988	6.26506	5.90361	21.374	13.4817	12.7273	15.625	21.0526	13.7625	16.3043	15.6785	241	1660	0.457639	0.914029	KLy	GAIN	CDS	min15k.min10pr
Neurof_GoNervSysDev_CNS__GAIN	0.288502	0.142916	0.162595	0.788893	0.281465	0.194326	0.209072	0.679704	0.187219	0.389683	0.400412	0.397493	0.298111	0.165548	0.180646	0.743171	7.46888	5.78313	1.24481	0.722892	0.414938	0.240964	0.414938	0.060241	0	0	2.48963	2.48963	2.48963	1.56627	2.6506	1.56627	10.687	4.58115	3.63636	6.80804	10.5263	5.66038	6.52174	5.92885	241	1660	0.533134	0.914029	KLy	GAIN	CDS	min15k.min10pr
Neurof_GoNeuronBody__GAIN	0.397164	0.207859	0.223479	0.650763	0.371471	0.272865	0.284144	0.546461	0.237758	0.500267	0.503667	0.297856	0.351063	0.299729	0.308393	0.510896	2.48963	1.92771	0.414938	0.240964	0.414938	0	0.414938	0	0	0	0.414938	1.24481	0.829876	0.481928	0.421687	1.0241	3.05344	1.96335	1.81818	1.89732	3.50877	2.21976	2.17391	1.58103	241	1660	0.690064	0.914029	KLy	GAIN	CDS	min15k.min10pr
PhMm_CompleteLethality__GAIN	0.311255	0.232449	0.251757	0.599018	0.28706	0.303208	0.318157	0.497358	0.199859	0.46849	0.478471	0.320145	0.307139	0.261031	0.277008	0.557508	5.80913	4.63855	0.829876	0.361446	0	0.060241	0	0	0	0	1.65975	2.07469	2.07469	1.08434	2.10843	1.44578	8.39695	3.14136	2.72727	5.91518	10.5263	4.5505	4.34783	4.74308	241	1660	0.710316	0.914029	KLy	GAIN	CDS	min15k.min10pr
BspanHM_lg2rpkm3.21__GAIN	0.0791149	0.234232	0.254315	0.594629	0.0972747	0.316511	0.320338	0.494391	0.0389012	0.601027	0.606824	0.216937	0.0845532	0.255252	0.27079	0.567368	23.2365	23.6145	10.7884	7.28916	3.73444	2.22892	2.07469	1.20482	1.24481	0.722892	5.80913	10.3734	7.05394	3.91566	10.5422	9.15663	25.1908	22.2513	20.9091	24.7768	22.807	21.8646	23.3696	25.6917	241	1660	0.710316	0.914029	KLy	GAIN	CDS	min15k.min10pr
PhMm_NeuroUnion_all__GAIN	0.0923733	0.247297	0.265875	0.575323	0.103441	0.345765	0.347758	0.458723	0.033137	0.722527	0.724592	0.139906	0.0918309	0.307127	0.317918	0.497685	20.332	17.6506	5.80913	4.93976	2.48963	1.50602	0.414938	0.481928	0.414938	0.361446	4.56432	9.12863	6.639	2.95181	7.22892	7.46988	20.6107	15.1832	20	19.7545	26.3158	16.9811	18.4783	18.4453	241	1660	0.733243	0.914029	KLy	GAIN	CDS	min15k.min10pr
HI_q2__GAIN	0.0812413	0.290867	0.306912	0.512986	0.110491	0.382638	0.386372	0.412994	0.028914	0.742392	0.744666	0.128039	0.0917062	0.284022	0.297241	0.526892	25.3112	23.7349	6.639	6.80723	2.90456	2.3494	2.48963	0.843373	0.829876	0.361446	6.639	9.54357	9.12863	3.79518	9.81928	10.1205	24.4275	21.466	26.3636	25.6696	28.0702	23.7514	24.4565	23.7154	241	1660	0.733243	0.914029	KLy	GAIN	CDS	min15k.min10pr
PhMm_NeuroBehav_all__GAIN	0.111461	0.26816	0.289339	0.538593	0.111764	0.381848	0.388188	0.410958	0.0392577	0.736051	0.738219	0.131815	0.104319	0.346756	0.359162	0.444709	13.6929	12.7108	4.56432	1.86747	0.414938	0.662651	0.414938	0.421687	0.414938	0.240964	3.73444	4.56432	5.39419	2.04819	5.06024	5.60241	13.7405	10.8639	13.6364	14.2857	19.2982	11.8757	11.9565	13.7022	241	1660	0.733243	0.914029	KLy	GAIN	CDS	min15k.min10pr
PhMm_Aggr_Sensory_all__GAIN	0.160292	0.323638	0.336643	0.472831	0.144848	0.443924	0.450094	0.346696	0.0572922	0.751023	0.75212	0.123713	0.144297	0.417477	0.424006	0.372628	9.54357	8.49398	1.65975	1.74699	0.414938	0.120482	0.414938	0	0.414938	0	2.07469	4.97925	2.48963	1.68675	2.77108	4.03614	11.4504	7.8534	7.27273	9.04018	12.2807	8.76804	8.69565	8.16864	241	1660	0.763893	0.914029	KLy	GAIN	CDS	min15k.min10pr
PhMm_NervSystem_all__GAIN	0.101231	0.31398	0.331582	0.479409	0.0997169	0.449081	0.452282	0.344591	0.0278741	0.808966	0.810115	0.0914531	0.0959702	0.39249	0.402811	0.394898	16.5975	13.9759	4.14938	3.6747	0.829876	0.783133	0.414938	0.421687	0.414938	0.240964	3.73444	7.88382	4.97925	2.59036	5.60241	5.78313	19.084	12.3037	13.6364	15.4018	22.807	14.0954	14.6739	13.834	241	1660	0.763893	0.914029	KLy	GAIN	CDS	min15k.min10pr
BspanVHM_EqlNat__GAIN	0.100615	0.322625	0.340462	0.467931	0.0992147	0.461216	0.466252	0.331379	0.0411653	0.712012	0.715169	0.145592	0.106873	0.341036	0.354665	0.450181	15.3527	14.9398	4.97925	3.6747	2.07469	1.26506	0.829876	0.361446	0.829876	0.120482	4.56432	5.80913	4.97925	2.53012	7.04819	5.36145	16.0305	13.6126	14.5455	16.0714	15.7895	14.0954	15.2174	15.942	241	1660	0.763893	0.914029	KLy	GAIN	CDS	min15k.min10pr
Kirov_NMDAR__GAIN	0.614272	0.452764	0.477487	0.321038	0.589154	0.470996	0.494284	0.306024	0.535368	0.512643	0.532671	0.273541	0.57506	0.481609	0.504055	0.297522	0.829876	0.421687	0	0	0	0	0	0	0	0	0	0	0.829876	0.120482	0.180723	0.120482	0	0.39267	1.81818	0.446429	0	0.332963	1.08696	0.527009	241	1660	0.763893	0.914029	KLy	GAIN	CDS	min15k.min10pr
SynKEGG_GABAergic__GAIN	0.355786	0.46231	0.478293	0.320306	0.308742	0.532086	0.542388	0.26569	0.106901	0.8405	0.840861	0.0752759	0.274283	0.586265	0.592639	0.227209	0.829876	0.903614	0.414938	0	0.414938	0	0	0	0	0	0.414938	0.414938	0	0	0.421687	0.481928	1.52672	0.65445	0	1.11607	0	0.887902	1.08696	0.922266	241	1660	0.813582	0.914029	KLy	GAIN	CDS	min15k.min10pr
PhHs_NervSys_All__GAIN	0.106631	0.396196	0.41031	0.386888	0.0896476	0.556122	0.560595	0.251351	0.0285367	0.835896	0.83677	0.0773941	0.105677	0.43878	0.447865	0.348853	12.0332	11.9277	2.90456	2.59036	1.24481	0.662651	0.829876	0.301205	0.414938	0.180723	1.65975	7.05394	3.3195	1.50602	5.54217	4.87952	14.5038	10.4712	9.09091	13.1696	14.0351	12.0977	11.413	11.726	241	1660	0.816866	0.914029	KLy	GAIN	CDS	min15k.min10pr
HI_q1__GAIN	0.0470297	0.392002	0.410085	0.387126	0.0435864	0.575588	0.58116	0.235705	0.0180413	0.765229	0.768606	0.114296	0.0504978	0.398189	0.415086	0.381862	21.1618	22.2289	7.05394	7.6506	4.56432	3.19277	2.90456	1.38554	1.65975	0.903614	4.56432	9.12863	7.46888	3.37349	9.6988	9.15663	22.1374	20.288	20	23.8839	14.0351	22.0866	23.3696	22.3979	241	1660	0.823309	0.914029	KLy	GAIN	CDS	min15k.min10pr
GOP_lessthan500g__GAIN	0.0177722	0.466825	0.477861	0.320698	0.0476863	0.645576	0.64307	0.191741	-0.0101516	0.748176	0.745677	-0.12745	0.0203061	0.494449	0.502813	0.298593	44.8133	47.4699	27.8008	27.8313	19.0871	16.988	12.4481	10.4819	8.71369	7.28916	9.12863	20.7469	14.9378	6.74699	21.2048	19.5181	47.3282	44.2408	41.8182	50.2232	42.1053	45.727	45.6522	49.5389	241	1660	0.839132	0.914029	KLy	GAIN	CDS	min15k.min10pr
BspanVH_lg2rpkm4.74__GAIN	0.0566912	0.439573	0.454044	0.342902	0.0476493	0.658034	0.658359	0.181537	0.0108937	0.892314	0.892818	0.049237	0.051561	0.511873	0.521252	0.282952	17.8423	16.988	7.05394	5.60241	3.73444	2.3494	1.65975	1.08434	0.829876	0.481928	3.3195	7.46888	7.05394	2.04819	8.55422	6.38554	19.8473	16.0995	15.4545	17.7455	22.807	16.9811	16.3043	16.996	241	1660	0.839132	0.92926	KLy	GAIN	CDS	min15k.min10pr
GI_q1__GAIN	0.0382739	0.457793	0.475287	0.323044	0.029774	0.686468	0.691049	0.160491	0.0127466	0.821385	0.82363	0.0842679	0.041457	0.454057	0.470809	0.327155	24.8963	22.9518	8.29876	8.25301	3.3195	3.55422	2.90456	1.86747	1.65975	0.963855	3.73444	10.7884	10.3734	3.49398	10	9.45783	26.7176	21.8586	22.7273	23.8839	21.0526	22.6415	26.087	23.3202	241	1660	0.839132	0.914029	KLy	GAIN	CDS	min15k.min10pr
PhHs_MindFun_ADX__GAIN	0.320771	0.625306	0.635852	0.196644	0.243807	0.71738	0.723108	0.140797	0.0659459	0.924296	0.924736	0.0339825	0.265508	0.691559	0.698573	0.155788	1.24481	0.843373	0	0	0	0	0	0	0	0	0.829876	0.414938	0	0.301205	0.240964	0.301205	0.763359	0.78534	1.81818	0.892857	0	0.776915	1.63043	0.922266	241	1660	0.841221	0.94323	KLy	GAIN	CDS	min15k.min10pr
PhMm_Aggr_CardvascMuscle_all__GAIN	0.0620204	0.610973	0.617807	0.209147	0.0246465	0.872858	0.87311	0.058931	-0.0231093	0.862537	0.861853	-0.0645667	0.0459604	0.730309	0.732967	0.134916	15.3527	12.5301	2.90456	3.37349	1.24481	0.903614	0	0.421687	0	0.180723	4.14938	6.639	4.56432	2.40964	5.24096	4.87952	16.7939	11.3874	13.6364	13.5045	17.5439	11.2098	14.6739	14.0975	241	1660	0.946	0.915719	KLy	GAIN	CDS	min15k.min10pr
BspanLA_lg2rpkm.MIN__GAIN	0.0212502	0.592314	0.601413	0.220827	0.00688381	0.904815	0.905054	0.0433254	-0.0207373	0.68383	0.677037	-0.169388	0.0226617	0.61572	0.623695	0.205028	22.4066	25.6627	12.8631	11.0241	6.639	5.3012	4.97925	3.49398	3.3195	2.04819	3.73444	12.0332	6.639	4.15663	10.4217	11.0843	21.374	21.9895	23.6364	28.7946	17.5439	24.7503	23.913	26.7457	241	1660	0.946	0.914029	KLy	GAIN	CDS	min15k.min10pr
GI_q3__GAIN	0.0444698	0.591897	0.598584	0.222875	0.014033	0.90879	0.908901	0.0414832	-0.0183933	0.84317	0.842341	-0.0745122	0.0392375	0.670706	0.674226	0.171194	22.8216	20.9639	7.88382	6.14458	2.48963	2.04819	0.829876	1.08434	0.414938	0.662651	4.97925	12.0332	5.80913	3.49398	9.57831	7.89157	24.4275	19.6335	20.9091	22.0982	22.807	20.6437	22.8261	21.3439	241	1660	0.946	0.914029	KLy	GAIN	CDS	min15k.min10pr
PhMm_Aggr_SkeCranioLimbs_all__GAIN	0.0394819	0.757209	0.764897	0.116397	0.000936318	0.995037	0.99504	0.00215933	-0.0453594	0.75698	0.749312	-0.125337	0.0223948	0.870108	0.872263	0.0593526	10.3734	10.6627	1.65975	1.80723	1.24481	0.301205	0.414938	0.180723	0	0.120482	2.07469	4.97925	3.3195	1.56627	4.87952	4.21687	12.9771	8.50785	7.27273	12.5	17.5439	10.8768	8.15217	10.4084	241	1660	0.998989	0.914029	KLy	GAIN	CDS	min15k.min10pr
PSD_BayesGrant_fullset__GAIN	0.0526768	0.765009	0.76737	0.114995	-0.000254737	0.998989	0.998989	-0.000439246	-0.0103679	0.95398	0.953899	-0.0204975	0.0520227	0.775359	0.777302	0.10941	10.3734	9.39759	1.24481	1.50602	0.414938	0.240964	0	0.120482	0	0.060241	2.07469	4.14938	4.14938	1.44578	4.15663	3.79518	9.16031	8.90052	11.8182	9.82143	8.77193	9.32297	10.8696	9.48617	241	1660	0.998989	0.953899	KLy	GAIN	CDS	min15k.min10pr
PhHs_MindFun_All__GAIN	0.00849053	0.978607	0.978631	0.00938119	-0.0443099	0.892311	0.891767	-0.0497487	-0.0879892	0.786066	0.783724	-0.105837	-0.0021036	0.994807	0.994806	-0.00226175	3.73444	4.45783	0.829876	0.301205	0	0	0	0	0	0	0.829876	1.65975	1.24481	0.722892	1.74699	1.98795	3.81679	4.58115	3.63636	4.35268	5.26316	4.5505	3.26087	4.34783	241	1660	0.946	0.914029	KLy	GAIN	CDS	min15k.min10pr
Neurof_KeggSynaptic__GAIN	-0.0276476	0.937629	0.937362	-0.0280926	-0.0936822	0.797892	0.795566	-0.0993237	-0.200029	0.582809	0.575348	-0.240069	-0.0774673	0.828129	0.82644	-0.0827885	2.48963	2.71084	0.414938	0.180723	0.414938	0	0	0	0	0	0.414938	0.414938	1.65975	0.301205	1.20482	1.20482	2.29008	1.96335	2.72727	3.34821	3.50877	1.66482	2.17391	3.95257	241	1660	0.901642	0.914029	KLy	GAIN	CDS	min15k.min10pr
HI_q4__GAIN	0.0114884	0.90236	0.902817	0.0444	-0.0420463	0.726873	0.725759	-0.139207	-0.0660758	0.527553	0.519295	-0.284586	-0.0011451	0.991203	0.9912	-0.00383874	19.0871	20	5.80913	5.48193	2.48963	1.74699	1.65975	0.662651	0.829876	0.481928	4.97925	8.71369	5.39419	3.49398	9.33735	7.16867	21.374	18.0628	16.3636	21.6518	15.7895	18.424	20.1087	21.8709	241	1660	0.841221	0.914029	KLy	GAIN	CDS	min15k.min10pr
BspanVHM_PreNat__GAIN	0.0056818	0.960551	0.960622	0.0174474	-0.0569723	0.688251	0.686874	-0.163123	-0.0603102	0.618938	0.613441	-0.212227	-0.00720336	0.952348	0.952258	-0.0212454	14.9378	15.0602	4.56432	3.91566	1.65975	1.3253	0.414938	0.542169	0	0.240964	1.65975	8.29876	4.97925	2.22892	7.04819	5.78313	18.3206	14.5288	10.9091	15.5134	15.7895	14.9834	14.6739	15.1515	241	1660	0.839132	0.914029	KLy	GAIN	CDS	min15k.min10pr
PhMm_Aggr_IntegAdipPigm_all__GAIN	-0.0143127	0.924234	0.923996	-0.0343301	-0.0743465	0.663665	0.66027	-0.180278	-0.125057	0.442598	0.434061	-0.362449	-0.0457254	0.776904	0.77534	-0.110508	10.7884	10.9036	2.07469	3.19277	0.829876	0.542169	0.414938	0.060241	0.414938	0.060241	4.56432	1.65975	4.56432	2.10843	4.15663	4.63855	10.687	9.55497	10.9091	12.0536	14.0351	9.9889	9.78261	11.9895	241	1660	0.839132	0.914029	KLy	GAIN	CDS	min15k.min10pr
PhMm_Aggr_DigestHepato_all__GAIN	-0.0253386	0.885451	0.884853	-0.0531288	-0.0994597	0.619581	0.614985	-0.211135	-0.128195	0.492239	0.482674	-0.316346	-0.055213	0.766784	0.764691	-0.116514	9.12863	10.3012	2.07469	2.10843	0.414938	0.301205	0	0.120482	0	0.060241	1.65975	4.14938	3.3195	2.10843	4.15663	4.03614	12.2137	7.72251	5.45455	12.5	12.2807	10.5438	8.15217	10.0132	241	1660	0.839132	0.914029	KLy	GAIN	CDS	min15k.min10pr
Neurof_PathwaysAxonG__GAIN	-0.211729	0.635661	0.623803	-0.204953	-0.302676	0.509784	0.492198	-0.30786	-0.318439	0.478876	0.456926	-0.340155	-0.254252	0.57374	0.558496	-0.25298	2.07469	2.3494	0	0.421687	0	0	0	0	0	0	1.24481	0.414938	0.414938	0.662651	0.963855	0.722892	2.29008	1.83246	1.81818	2.79018	1.75439	2.21976	2.17391	2.50329	241	1660	0.763893	0.914029	KLy	GAIN	CDS	min15k.min10pr
SynKEGG_Glutamatergic__GAIN	-0.75165	0.474443	0.42822	-0.368333	-0.765693	0.466351	0.418952	-0.377836	-0.747001	0.477155	0.431323	-0.365197	-0.736263	0.483667	0.438893	-0.357641	0.414938	0.722892	0	0	0	0	0	0	0	0	0	0	0.414938	0.060241	0.301205	0.361446	0	0.26178	0.909091	1.11607	0	0.332963	0.543478	1.18577	241	1660	0.76309	0.914029	KLy	GAIN	CDS	min15k.min10pr
SynKEGG_Serotonergic__GAIN	-0.78455	0.456373	0.407928	-0.389417	-0.846612	0.423909	0.371483	-0.430061	-1.08121	0.330189	0.267323	-0.572964	-0.867306	0.414757	0.361372	-0.442045	0.414938	0.722892	0	0	0	0	0	0	0	0	0.414938	0	0	0	0.421687	0.301205	0.763359	0.52356	0	0.892857	0	0.443951	0.543478	1.05402	241	1660	0.733243	0.82469	KLy	GAIN	CDS	min15k.min10pr
BspanML_lg2rpkm0.93__GAIN	-0.0365302	0.628407	0.623378	-0.205248	-0.137289	0.191947	0.185753	-0.731065	-0.102036	0.215835	0.202386	-0.693819	-0.0567677	0.499001	0.492201	-0.307857	26.556	26.747	8.29876	10.0602	4.56432	4.45783	1.24481	1.86747	1.24481	1.08434	5.39419	12.8631	8.29876	4.09639	12.1687	10.4819	25.1908	23.1675	28.1818	29.7991	22.807	25.4162	27.7174	28.3267	241	1660	0.498599	0.737263	KLy	GAIN	CDS	min15k.min10pr
GI_q2__GAIN	-0.0633652	0.519052	0.507832	-0.29428	-0.172777	0.176477	0.162673	-0.788684	-0.155223	0.15326	0.134872	-0.870079	-0.092949	0.38585	0.372352	-0.429046	13.6929	19.3976	4.56432	6.14458	2.48963	2.16867	2.07469	0.963855	1.24481	0.662651	4.97925	5.80913	2.90456	3.01205	10	6.38554	12.2137	18.4555	15.4545	20.2009	14.0351	19.2009	13.587	19.6311	241	1660	0.460908	0.737263	KLy	GAIN	CDS	min15k.min10pr
PhMm_Aggr_EndoExocrRepr_all__GAIN	-0.118765	0.408298	0.393189	-0.405399	-0.248344	0.14696	0.135508	-0.868034	-0.264881	0.0995138	0.0819257	-1.08658	-0.156255	0.311403	0.29539	-0.529604	12.4481	14.0361	2.90456	3.19277	0.414938	0.722892	0.414938	0.240964	0	0.180723	3.73444	4.14938	4.56432	2.6506	5.90361	5.48193	16.7939	11.911	7.27273	15.8482	10.5263	12.8746	13.0435	15.415	241	1660	0.457639	0.737263	KLy	GAIN	CDS	min15k.min10pr
PhMm_Aggr_HematoImmune_all__GAIN	-0.109075	0.378745	0.35977	-0.443975	-0.225668	0.122758	0.111741	-0.951786	-0.183401	0.156727	0.134201	-0.872244	-0.132532	0.30768	0.288185	-0.540329	13.6929	15.5422	2.48963	5.12048	1.65975	1.74699	0.414938	0.662651	0	0.301205	2.90456	6.22407	4.56432	2.28916	6.26506	6.98795	13.7405	12.1728	13.6364	18.4152	15.7895	15.6493	13.0435	15.415	241	1660	0.457639	0.737263	KLy	GAIN	CDS	min15k.min10pr
SynKEGG_Dopaminergic__GAIN	-1.23972	0.222132	0.132729	-0.877034	-1.33096	0.19498	0.108036	-0.966431	-1.30328	0.200929	0.112488	-0.948893	-1.24349	0.221618	0.132836	-0.876683	0.414938	1.14458	0	0.060241	0	0	0	0	0	0	0	0	0.414938	0.060241	0.481928	0.60241	0.763359	0.65445	0	1.5625	1.75439	0.443951	0	1.97628	241	1660	0.457639	0.737263	KLy	GAIN	CDS	min15k.min10pr
HI_q3__GAIN	-0.0758573	0.427164	0.410619	-0.386561	-0.216346	0.0902661	0.081051	-1.09124	-0.156046	0.132368	0.110534	-0.956503	-0.107211	0.303413	0.283835	-0.546933	19.5021	21.3253	6.22407	6.26506	2.48963	2.22892	1.24481	1.08434	0	0.60241	4.14938	9.95851	5.39419	3.55422	10.1205	7.6506	22.9008	19.5026	15.4545	22.8795	15.7895	19.4229	20.6522	23.5837	241	1660	0.457639	0.737263	KLy	GAIN	CDS	min15k.min10pr
SynKEGG_Cholinergic__GAIN	-13.8028	0.965235	0.0108029	-1.96646	-13.8383	0.965098	0.00967054	-2.01455	-13.8245	0.965143	0.0100582	-1.99748	-13.8109	0.965131	0.0104497	-1.9809	0	1.20482	0	0	0	0	0	0	0	0	0	0	0	0.060241	0.722892	0.421687	0	0.78534	0	1.5625	0	0.665927	0	1.84453	241	1660	0.356991	0.512968	KLy	GAIN	CDS	min15k.min10pr
PhMm_Aggr_EndoExocrRepr_all__LOSS	0.17081	0.294941	0.344978	0.462209	0.706626	0.0169354	0.0229297	1.6396	0.499931	0.0662959	0.0802514	1.09555	0.474662	0.0721565	0.0918864	1.03675	6.41026	4.06654	0.854701	0.308071	0	0.0616143	0	0.0616143	0	0.0616143	0	2.13675	4.2735	0.123229	1.23229	2.71103	7.03125	4.66045	5.66038	3.55505	7.27273	3.6405	6.14525	4.56989	234	1623	0.699959	0.849498	KLn	LOSS	CDS	min15k.min10pr
PhMm_NeuroUnion_all__LOSS	0.0836323	0.474589	0.515777	0.287538	0.531414	0.0247378	0.0289593	1.53821	0.309568	0.130034	0.143272	0.843839	0.269138	0.175375	0.196771	0.706038	10.6838	7.88663	0.854701	0.800986	0.42735	0.123229	0	0.0616143	0	0.0616143	0	2.99145	7.69231	0.369686	2.46457	5.05237	13.2812	7.19041	7.54717	8.48624	14.5455	7.16724	9.49721	8.73656	234	1623	0.699959	0.849498	KLn	LOSS	CDS	min15k.min10pr
FMR1_Targets_Darnell__LOSS	0.655794	0.120375	0.147392	0.831526	1.0361	0.0302141	0.0423201	1.37345	0.837986	0.0614468	0.0814323	1.0892	0.819151	0.0667524	0.0866716	1.06212	2.99145	1.35551	0	0.123229	0	0	0	0	0	0	0	0.42735	2.5641	0.246457	0.492914	0.616143	3.125	1.73103	2.83019	1.03211	3.63636	1.25142	2.7933	1.47849	234	1623	0.699959	0.849498	KLn	LOSS	CDS	min15k.min10pr
PhMm_NervSystem_all__LOSS	0.0767972	0.5662	0.601194	0.220985	0.540868	0.0460655	0.0548987	1.26044	0.338019	0.16521	0.181364	0.741449	0.29406	0.206377	0.233674	0.63139	7.26496	5.54529	0.854701	0.492914	0.42735	0.0616143	0	0.0616143	0	0.0616143	0	2.5641	4.70085	0.246457	2.21811	3.08071	7.8125	5.7257	6.60377	5.38991	7.27273	4.89192	7.26257	6.3172	234	1623	0.699959	0.849498	KLn	LOSS	CDS	min15k.min10pr
Neurof_UnionInclusive__LOSS	0.0538296	0.679868	0.703629	0.152656	0.488594	0.0744261	0.084032	1.07556	0.284509	0.24143	0.257707	0.588874	0.240286	0.300363	0.329509	0.482132	7.69231	6.09982	0.854701	0.492914	0	0.184843	0	0.0616143	0	0.0616143	0	2.5641	5.12821	0.184843	1.78681	4.12816	8.59375	6.79095	6.60377	5.50459	7.27273	5.91581	7.82123	6.3172	234	1623	0.714272	0.849498	KLn	LOSS	CDS	min15k.min10pr
PhMm_Aggr_IntegAdipPigm_all__LOSS	0.133185	0.479277	0.514684	0.288459	0.500918	0.0949709	0.108018	0.966502	0.346142	0.217917	0.23445	0.62995	0.305735	0.274783	0.292206	0.534311	6.41026	4.313	0	0.369686	0	0.0616143	0	0.0616143	0	0.0616143	0	0.854701	5.55556	0.184843	1.10906	3.0191	8.59375	3.72836	3.77358	4.81651	9.09091	4.32309	5.58659	4.30108	234	1623	0.739218	0.849498	KLn	LOSS	CDS	min15k.min10pr
Neurof_GoNervTransm__LOSS	0.23213	0.438988	0.477546	0.320985	0.680875	0.115436	0.138487	0.858592	0.556012	0.187699	0.212762	0.672106	0.535682	0.203557	0.22868	0.640772	2.5641	1.54036	0.42735	0.123229	0	0.0616143	0	0.0616143	0	0.0616143	0	1.28205	1.28205	0.0616143	0.739372	0.739372	3.125	1.59787	1.88679	1.49083	3.63636	1.13766	2.23464	2.01613	234	1623	0.739218	0.849498	KLn	LOSS	CDS	min15k.min10pr
PhMm_CompleteLethality__LOSS	0.473346	0.317037	0.343743	0.463766	0.750479	0.139856	0.166501	0.778582	0.585192	0.236831	0.263056	0.579952	0.521849	0.29466	0.3179	0.497709	2.13675	1.17067	0	0.123229	0	0	0	0	0	0	0	0	2.13675	0.0616143	0.184843	0.924214	2.34375	0.798935	1.88679	1.49083	5.45455	0.910125	1.11732	1.47849	234	1623	0.739218	0.849498	KLn	LOSS	CDS	min15k.min10pr
Kirov_ARC__LOSS	2.10395	0.173212	0.193998	0.712203	2.20163	0.159496	0.179617	0.745653	2.13702	0.165181	0.186794	0.728636	2.09533	0.172274	0.193802	0.712643	0.42735	0.0616143	0	0	0	0	0	0	0	0	0	0	0.42735	0	0	0.0616143	0.78125	0	0	0.114679	0	0.113766	0.558659	0	234	1623	0.739218	0.849498	KLn	LOSS	CDS	min15k.min10pr
PhMm_NeuroBehav_all__LOSS	0.0657004	0.717914	0.732308	0.135306	0.37442	0.19046	0.202991	0.692523	0.231179	0.388173	0.399042	0.398982	0.198832	0.457646	0.467577	0.330147	7.26496	5.36044	0	0.308071	0	0.0616143	0	0.0616143	0	0.0616143	0	1.7094	5.55556	0.308071	1.47874	3.57363	8.59375	4.66045	5.66038	5.9633	7.27273	4.89192	7.26257	5.91398	234	1623	0.739218	0.849498	KLn	LOSS	CDS	min15k.min10pr
Neurof_KeggSynaptic__LOSS	0.317492	0.510205	0.546843	0.262137	0.916296	0.187631	0.220421	0.656747	0.789707	0.24952	0.280821	0.551571	0.706442	0.305671	0.334959	0.475008	1.28205	0.739372	0	0.0616143	0	0.0616143	0	0.0616143	0	0	0	0	1.28205	0.0616143	0.123229	0.554529	0.78125	0.932091	1.88679	0.573394	0	1.02389	1.67598	0.403226	234	1623	0.739218	0.849498	KLn	LOSS	CDS	min15k.min10pr
PhHs_NervSys_All__LOSS	0.121889	0.645818	0.653591	0.184694	0.38889	0.213516	0.227039	0.6439	0.238987	0.416252	0.426931	0.369642	0.195297	0.507909	0.515801	0.287518	6.41026	5.11399	0	0.246457	0	0.0616143	0	0.0616143	0	0.0616143	0	0.854701	5.55556	0.184843	1.97166	2.95749	6.25	4.92676	6.60377	5.27523	5.45455	4.77816	6.70391	5.51075	234	1623	0.739218	0.849498	KLn	LOSS	CDS	min15k.min10pr
BspanVHM_PstNat__LOSS	0.0114655	0.939727	0.940725	0.0265375	0.307978	0.22168	0.236789	0.625638	0.1216	0.582127	0.590712	0.228624	0.0841022	0.708272	0.712891	0.146977	7.26496	6.09982	1.28205	0.924214	0	0.246457	0	0.123229	0	0.123229	0	1.7094	5.55556	0.184843	1.78681	4.12816	6.25	7.32357	8.49057	5.04587	9.09091	5.00569	6.70391	7.39247	234	1623	0.739218	0.849498	KLn	LOSS	CDS	min15k.min10pr
Neurof_GoSynaptic__LOSS	0.27186	0.514164	0.540346	0.267328	0.655755	0.217078	0.242198	0.615829	0.486435	0.341904	0.364738	0.438019	0.445479	0.384442	0.405107	0.39243	2.13675	1.10906	0	0.123229	0	0.0616143	0	0.0616143	0	0	0	0.854701	1.28205	0.0616143	0.184843	0.8626	2.34375	1.33156	1.88679	0.917431	1.81818	0.796359	2.23464	1.47849	234	1623	0.739218	0.849498	KLn	LOSS	CDS	min15k.min10pr
PSD_BayesGrant_fullset__LOSS	0.0992178	0.709551	0.721123	0.141991	0.39266	0.267145	0.287673	0.541101	0.227747	0.483375	0.500314	0.300757	0.180363	0.580377	0.591745	0.227865	4.2735	2.77264	0	0.246457	0	0.184843	0	0.123229	0	0.0616143	0	0.854701	3.4188	0.123229	0.739372	1.91004	3.125	2.52996	5.66038	2.98165	1.81818	2.16155	5.02793	3.49462	234	1623	0.739218	0.849498	KLn	LOSS	CDS	min15k.min10pr
PhMm_Aggr_HematoImmune_all__LOSS	0.0171412	0.92044	0.922243	0.0351546	0.308259	0.282902	0.294693	0.53063	0.153469	0.563313	0.570152	0.244009	0.126923	0.63261	0.638641	0.194743	6.83761	5.54529	0.42735	0.246457	0	0.123229	0	0.0616143	0	0.0616143	0	0	6.83761	0.184843	1.78681	3.57363	7.03125	5.45939	6.60377	5.61927	3.63636	4.66439	7.82123	6.58602	234	1623	0.739218	0.849498	KLn	LOSS	CDS	min15k.min10pr
GOP_lessthan500g__LOSS	-0.0796823	0.32922	0.282015	-0.549728	0.234448	0.305788	0.295622	0.529263	-0.0499813	0.564223	0.557144	-0.254033	-0.0754351	0.399796	0.387491	-0.411739	29.4872	28.4658	8.11966	9.4886	3.84615	3.51201	0.854701	1.66359	0	1.2939	0.854701	6.83761	21.7949	1.10906	8.1947	19.162	31.25	31.2916	27.3585	26.0321	27.2727	25.5973	30.1676	31.8548	234	1623	0.739218	0.849498	KLn	LOSS	CDS	min15k.min10pr
Neurof_GoNervSysDev__LOSS	0.0335772	0.878858	0.882889	0.054094	0.369223	0.306888	0.324331	0.489012	0.234249	0.491033	0.504263	0.297343	0.160015	0.64023	0.647768	0.188581	3.84615	3.75847	0.42735	0.246457	0	0.123229	0	0.0616143	0	0.0616143	0	1.28205	2.5641	0.123229	0.924214	2.71103	3.125	3.86152	4.71698	3.66972	1.81818	4.20933	4.46927	3.22581	234	1623	0.751857	0.849498	KLn	LOSS	CDS	min15k.min10pr
PhMm_Aggr_DigestHepato_all__LOSS	0.0242403	0.907281	0.909205	0.0413382	0.290746	0.344046	0.356915	0.447436	0.149749	0.60335	0.609952	0.214705	0.122518	0.67036	0.67529	0.17051	5.55556	4.86753	0.42735	0.184843	0	0.123229	0	0.0616143	0	0.0616143	0	0.42735	5.12821	0.308071	0.985829	3.57363	5.46875	5.45939	5.66038	4.3578	7.27273	4.43686	5.02793	5.37634	234	1623	0.79142	0.849498	KLn	LOSS	CDS	min15k.min10pr
Neurof_GoNeuronBody__LOSS	0.571323	0.615408	0.634928	0.197276	1.0726	0.379943	0.417769	0.379064	0.789681	0.501399	0.530309	0.275471	0.708944	0.544444	0.568954	0.244923	0.42735	0.308071	0	0	0	0	0	0	0	0	0	0	0.42735	0.0616143	0.0616143	0.184843	0	0.399467	0.943396	0.229358	0	0.455063	0.558659	0.134409	234	1623	0.793027	0.849498	KLn	LOSS	CDS	min15k.min10pr
HI_q3__LOSS	-0.0454862	0.769306	0.74979	-0.12506	0.176834	0.438575	0.442701	0.353889	0.0365615	0.852252	0.852904	0.0690999	0.00339783	0.986311	0.986318	0.00598299	10.2564	10.1047	2.13675	1.54036	0	0.123229	0	0.0616143	0	0.0616143	0.42735	2.99145	6.83761	0.739372	3.08071	6.28466	10.1562	10.5193	10.3774	9.74771	7.27273	8.64619	11.1732	11.828	234	1623	0.793027	0.970881	KLn	LOSS	CDS	min15k.min10pr
HI_q2__LOSS	-0.0794938	0.645767	0.61324	-0.21237	0.189557	0.447223	0.450937	0.345884	-0.0140786	0.942694	0.942582	-0.0256806	-0.0513342	0.795995	0.794637	-0.0998311	11.9658	10.3512	0.42735	1.60197	0	0.308071	0	0.123229	0	0.0616143	0	2.5641	9.40171	0.492914	3.32717	6.53112	14.0625	12.3835	9.43396	8.60092	10.9091	8.98749	12.2905	11.9624	234	1623	0.793027	0.998193	KLn	LOSS	CDS	min15k.min10pr
BspanLA_lg2rpkm.MIN__LOSS	-0.0631747	0.559563	0.53762	-0.269525	0.114707	0.472142	0.476773	0.321689	-0.0176327	0.881418	0.880551	-0.0552456	-0.0399441	0.732557	0.727925	-0.137913	16.2393	13.1238	2.13675	3.82009	0.854701	1.23229	0	0.800986	0	0.554529	0.42735	3.4188	12.3932	0.800986	3.94331	8.37954	14.8438	13.5819	17.9245	12.7294	14.5455	11.9454	16.7598	14.5161	234	1623	0.810513	0.970881	KLn	LOSS	CDS	min15k.min10pr
BspanVH_lg2rpkm4.74__LOSS	-0.0605503	0.757377	0.721456	-0.14179	0.180484	0.524534	0.534907	0.271722	0.012297	0.960522	0.960651	0.0174344	-0.02637	0.91617	0.915602	-0.0382931	5.98291	5.73013	0.42735	0.739372	0	0.246457	0	0.184843	0	0.123229	0	2.13675	3.84615	0.4313	1.91004	3.38879	5.46875	7.05726	6.60377	4.58716	7.27273	5.68828	5.58659	5.77957	234	1623	0.820666	0.998193	KLn	LOSS	CDS	min15k.min10pr
BspanHM_lg2rpkm3.21__LOSS	-0.0605012	0.70134	0.671809	-0.172754	0.130442	0.545534	0.549557	0.259987	-0.000488759	0.997888	0.997888	-0.000918392	-0.0284737	0.879433	0.878829	-0.0560958	9.40171	9.79667	2.5641	1.35551	0	0.492914	0	0.184843	0	0.0616143	0	2.99145	6.41026	0.616143	2.77264	6.40789	8.59375	10.6525	10.3774	9.05963	9.09091	8.41866	9.49721	11.4247	234	1623	0.820666	0.998193	KLn	LOSS	CDS	min15k.min10pr
Neurof_GoNeuronProj__LOSS	-0.043697	0.898831	0.894875	-0.0482378	0.301083	0.551097	0.563576	0.249047	0.133151	0.778423	0.782558	0.106484	0.0499095	0.916159	0.9168	0.0377255	2.13675	2.09489	0	0.184843	0	0.123229	0	0.0616143	0	0.0616143	0	0.854701	1.28205	0.184843	0.4313	1.47874	2.34375	1.86418	1.88679	2.29358	3.63636	2.16155	1.67598	2.01613	234	1623	0.820666	0.970881	KLn	LOSS	CDS	min15k.min10pr
FMR1_Targets_Ascano__LOSS	-0.00255724	0.994876	0.994872	-0.00223259	0.267018	0.56683	0.576878	0.238916	0.139553	0.758038	0.761581	0.118284	0.113034	0.802345	0.804753	0.0943374	2.13675	2.46457	0.42735	0.0616143	0	0.0616143	0	0.0616143	0	0.0616143	0	0	2.13675	0.246457	0.739372	1.47874	1.5625	2.79627	2.83019	2.1789	1.81818	2.50284	2.23464	2.41935	234	1623	0.820666	0.970881	KLn	LOSS	CDS	min15k.min10pr
PhHs_MindFun_All__LOSS	0.0279797	0.949428	0.949602	0.0224584	0.23196	0.616456	0.624565	0.204422	0.109757	0.807899	0.810171	0.0914236	0.0651345	0.885663	0.88647	0.052336	2.5641	2.34134	0	0.123229	0	0	0	0	0	0	0	0.42735	2.13675	0.123229	0.554529	1.66359	0.78125	1.86418	4.71698	2.75229	0	2.16155	3.35196	2.55376	234	1623	0.820666	0.970881	KLn	LOSS	CDS	min15k.min10pr
Neurof_UnionStringent__LOSS	-0.0622692	0.856346	0.847343	-0.0719406	0.234403	0.634417	0.64366	0.191344	0.0777112	0.867889	0.869423	0.0607691	-0.00390003	0.993377	0.993375	-0.0028867	2.13675	2.21811	0	0.246457	0	0.123229	0	0.0616143	0	0.0616143	0	0.854701	1.28205	0.123229	0.492914	1.60197	2.34375	1.86418	1.88679	2.52294	3.63636	2.38908	1.67598	2.01613	234	1623	0.820666	0.970881	KLn	LOSS	CDS	min15k.min10pr
SynKEGG_Serotonergic__LOSS	0.265893	0.807708	0.813444	0.0896724	0.473012	0.670053	0.685771	0.163821	0.377452	0.73335	0.743797	0.128545	0.36131	0.745491	0.754931	0.122093	0.42735	0.492914	0	0	0	0	0	0	0	0	0	0	0.42735	0.0616143	0.0616143	0.369686	0	0.532623	0.943396	0.458716	0	0.796359	0.558659	0.134409	234	1623	0.853032	0.970881	KLn	LOSS	CDS	min15k.min10pr
Neurof_GoNervSysDev_CNS__LOSS	-0.0424772	0.927153	0.92667	-0.0330749	0.173395	0.729348	0.734009	0.134299	0.0650206	0.893932	0.894734	0.0483062	-0.014208	0.976868	0.97683	-0.0101808	2.13675	2.34134	0	0.123229	0	0.0616143	0	0	0	0	0	0.42735	1.7094	0.0616143	0.677757	1.60197	2.34375	2.66312	1.88679	2.06422	1.81818	2.73038	2.23464	1.88172	234	1623	0.87348	0.970881	KLn	LOSS	CDS	min15k.min10pr
GI_q1__LOSS	-0.102928	0.450918	0.427917	-0.36864	0.0543409	0.763709	0.765101	0.116281	-0.0667114	0.637416	0.629634	-0.200912	-0.081993	0.566441	0.555124	-0.25561	15.3846	14.1713	1.7094	2.83426	0	0.739372	0	0.554529	0	0.246457	0.854701	1.7094	12.8205	0.800986	3.38879	9.98152	16.4062	15.8455	14.1509	12.7294	7.27273	13.7656	17.8771	14.6505	234	1623	0.87348	0.849498	KLn	LOSS	CDS	min15k.min10pr
BspanVHM_EqlNat__LOSS	-0.12614	0.648936	0.595912	-0.224818	0.0915499	0.786183	0.787844	0.10356	-0.0428957	0.889535	0.888926	-0.0511345	-0.0837048	0.788506	0.78628	-0.104423	5.12821	5.36044	0	0.492914	0	0.123229	0	0.0616143	0	0.0616143	0	1.28205	3.84615	0.4313	1.7252	3.20394	5.46875	5.05992	4.71698	5.61927	3.63636	5.11945	5.58659	5.64516	234	1623	0.87348	0.970881	KLn	LOSS	CDS	min15k.min10pr
HI_q1__LOSS	-0.141201	0.367627	0.335422	-0.474409	0.018951	0.926922	0.92706	0.032892	-0.104676	0.51703	0.504194	-0.297403	-0.115973	0.474239	0.458996	-0.338191	11.1111	11.2138	1.28205	3.20394	0	0.985829	0	0.369686	0	0.184843	0.42735	1.7094	8.97436	0.492914	3.0191	7.70179	11.7188	11.5846	10.3774	10.8945	9.09091	11.9454	11.7318	10.3495	234	1623	0.945602	0.849498	KLn	LOSS	CDS	min15k.min10pr
SynKEGG_GABAergic__LOSS	-9.96554	0.975519	0.705221	-0.151675	0.970809	0.997615	1	0	-0.551227	0.998646	0.998193	-0.000785404	-3.79497	0.990677	0.986114	-0.00607291	0	0.0616143	0	0	0	0	0	0	0	0	0	0	0	0.0616143	0	0	0	0.133156	0	0	0	0.113766	0	0	234	1623	1	0.998193	KLn	LOSS	CDS	min15k.min10pr
BspanVHM_PreNat__LOSS	-0.212176	0.471427	0.42394	-0.372696	-0.0413775	0.900641	0.90024	-0.0456419	-0.150935	0.625792	0.618003	-0.20901	-0.173411	0.576664	0.566497	-0.246802	4.70085	4.86753	0	0.554529	0	0.123229	0	0.123229	0	0.0616143	0	2.13675	2.5641	0.369686	1.41713	3.08071	4.6875	5.59254	4.71698	4.24312	5.45455	4.32309	4.46927	5.51075	234	1623	0.936984	0.849498	KLn	LOSS	CDS	min15k.min10pr
GI_q3__LOSS	-0.184474	0.429246	0.372895	-0.428413	-0.034476	0.896037	0.895693	-0.0478406	-0.144949	0.54164	0.531718	-0.274318	-0.164623	0.493595	0.481863	-0.317076	6.41026	7.70179	0.854701	1.2939	0	0.246457	0	0.0616143	0	0.0616143	0	2.13675	4.2735	0.4313	2.40296	4.86753	7.03125	8.25566	5.66038	7.22477	10.9091	7.6223	5.02793	7.7957	234	1623	0.936984	0.849498	KLn	LOSS	CDS	min15k.min10pr
GI_q4__LOSS	-0.181177	0.375584	0.331458	-0.479571	-0.0451401	0.848688	0.848132	-0.0715367	-0.138395	0.510191	0.5001	-0.300943	-0.168875	0.424748	0.411204	-0.385942	8.97436	10.7209	1.28205	1.54036	0	0.123229	0	0.123229	0	0.123229	0.42735	2.13675	6.41026	0.492914	3.51201	6.71596	10.9375	11.0519	6.60377	10.4358	9.09091	10.2389	8.93855	11.2903	234	1623	0.920313	0.849498	KLn	LOSS	CDS	min15k.min10pr
GI_q2__LOSS	-0.227626	0.323743	0.278519	-0.555145	-0.0724627	0.787668	0.786664	-0.104211	-0.178585	0.451063	0.441092	-0.355471	-0.199933	0.401742	0.390017	-0.408916	6.83761	8.99569	1.7094	1.04744	0	0.0616143	0	0.0616143	0	0.0616143	0	1.28205	5.55556	0.554529	3.4504	4.99076	7.8125	10.6525	5.66038	7.56881	5.45455	7.84983	7.26257	10.3495	234	1623	0.87348	0.849498	KLn	LOSS	CDS	min15k.min10pr
PhMm_Aggr_Sensory_all__LOSS	-0.286556	0.426134	0.394544	-0.403905	-0.109837	0.779057	0.776557	-0.109827	-0.23976	0.518453	0.505055	-0.296661	-0.262158	0.481134	0.46588	-0.331726	3.4188	4.00493	0	0.246457	0	0.0616143	0	0.0616143	0	0.0616143	0	0.42735	2.99145	0.123229	1.35551	2.52619	4.6875	4.26099	1.88679	3.7844	3.63636	3.52673	3.35196	4.56989	234	1623	0.87348	0.849498	KLn	LOSS	CDS	min15k.min10pr
SynKEGG_Glutamatergic__LOSS	-10.9345	0.978345	0.532772	-0.273459	-10.4409	0.974185	0.628259	-0.201861	-10.4932	0.975089	0.632959	-0.198624	-10.5042	0.975962	0.642937	-0.191831	0	0.184843	0	0.0616143	0	0	0	0	0	0	0	0	0	0.0616143	0.0616143	0.0616143	0	0.266312	0	0.114679	0	0.341297	0	0	234	1623	0.820666	0.849498	KLn	LOSS	CDS	min15k.min10pr
PhMm_Aggr_SkeCranioLimbs_all__LOSS	-0.359294	0.362404	0.328289	-0.483744	-0.200298	0.6347	0.627667	-0.202271	-0.293743	0.46887	0.45242	-0.344458	-0.364133	0.372155	0.350835	-0.454897	2.99145	4.18977	0	0.184843	0	0.0616143	0	0.0616143	0	0.0616143	0	0.42735	2.5641	0.0616143	1.17067	2.95749	4.6875	4.26099	0.943396	4.12844	3.63636	4.20933	2.7933	4.16667	234	1623	0.820666	0.849498	KLn	LOSS	CDS	min15k.min10pr
PhMm_Aggr_CardvascMuscle_all__LOSS	-0.306953	0.301999	0.257952	-0.588462	-0.174498	0.587263	0.58083	-0.235951	-0.263527	0.384479	0.367648	-0.434567	-0.3031	0.319626	0.300121	-0.522704	4.70085	5.85336	0.42735	0.554529	0	0.0616143	0	0.0616143	0	0.0616143	0	0.854701	3.84615	0.369686	1.78681	3.69686	5.46875	5.7257	3.77358	5.9633	3.63636	4.77816	5.02793	7.12366	234	1623	0.820666	0.849498	KLn	LOSS	CDS	min15k.min10pr
SynKEGG_Dopaminergic__LOSS	-11.2095	0.975623	0.46545	-0.332127	-11.6328	0.981524	0.572359	-0.242331	-10.8341	0.972606	0.546941	-0.262059	-10.943	0.972679	0.530913	-0.274977	0	0.246457	0	0.0616143	0	0	0	0	0	0	0	0	0	0.0616143	0.0616143	0.123229	0	0.399467	0	0.114679	0	0.455063	0	0	234	1623	0.820666	0.849498	KLn	LOSS	CDS	min15k.min10pr
Kirov_NMDAR__LOSS	-11.654	0.974059	0.383984	-0.415687	-12.2136	0.980052	0.446181	-0.350489	-12.326	0.980513	0.436536	-0.35998	-12.3273	0.980651	0.439456	-0.357085	0	0.246457	0	0.0616143	0	0	0	0	0	0	0	0	0	0.0616143	0.0616143	0.123229	0	0.266312	0	0.229358	0	0.341297	0	0.134409	234	1623	0.793027	0.849498	KLn	LOSS	CDS	min15k.min10pr
SynKEGG_Cholinergic__LOSS	-11.8431	0.973148	0.344922	-0.462279	-12.2607	0.979936	0.436044	-0.360469	-12.4642	0.98012	0.404695	-0.392872	-12.4548	0.980205	0.408718	-0.388576	0	0.246457	0	0.0616143	0	0	0	0	0	0	0	0	0	0.0616143	0.123229	0.0616143	0	0.399467	0	0.114679	0	0.341297	0	0.134409	234	1623	0.793027	0.849498	KLn	LOSS	CDS	min15k.min10pr
PhHs_NervSys_ADX__LOSS	-0.939889	0.351297	0.274048	-0.562174	-0.739519	0.464027	0.407856	-0.389493	-0.850564	0.400048	0.331882	-0.479017	-0.909154	0.368285	0.294631	-0.530721	0.42735	0.985829	0	0.0616143	0	0	0	0	0	0	0	0	0.42735	0.123229	0.369686	0.492914	0	0.665779	0.943396	1.26147	0	0.682594	0.558659	1.34409	234	1623	0.793027	0.849498	KLn	LOSS	CDS	min15k.min10pr
BspanML_lg2rpkm0.93__LOSS	-0.277533	0.107827	0.0824566	-1.08377	-0.206287	0.311946	0.304384	-0.516578	-0.246587	0.161187	0.14322	-0.843996	-0.263239	0.138666	0.120841	-0.917784	11.5385	15.0955	1.28205	3.08071	0.42735	0.739372	0.42735	0.184843	0	0.0616143	0.42735	1.7094	9.40171	0.677757	4.43623	9.98152	14.8438	15.9787	7.54717	14.3349	5.45455	14.9033	13.4078	15.3226	234	1623	0.739218	0.849498	KLn	LOSS	CDS	min15k.min10pr
PhHs_MindFun_ADX__LOSS	-12.6445	0.973981	0.237609	-0.624137	-12.1224	0.971453	0.298191	-0.525505	-12.2965	0.9718	0.269728	-0.569075	-12.39	0.971606	0.249404	-0.603096	0	0.308071	0	0	0	0	0	0	0	0	0	0	0	0.0616143	0.0616143	0.184843	0	0.266312	0	0.344037	0	0.227531	0	0.403226	234	1623	0.739218	0.849498	KLn	LOSS	CDS	min15k.min10pr
Neurof_PathwaysAxonG__LOSS	-12.8736	0.968839	0.10354	-0.98489	-13.5665	0.978275	0.143829	-0.842155	-12.6573	0.967465	0.131254	-0.881887	-13.7489	0.978378	0.11072	-0.955775	0	0.739372	0	0.123229	0	0.0616143	0	0	0	0	0	0	0	0.123229	0.246457	0.369686	0	0.532623	0	0.917431	0	0.910125	0	0.537634	234	1623	0.739218	0.849498	KLn	LOSS	CDS	min15k.min10pr
HI_q4__LOSS	-0.657345	0.0458463	0.0257986	-1.5884	-0.575677	0.0962488	0.0757903	-1.12039	-0.614344	0.0653851	0.0450271	-1.34653	-0.678186	0.0434672	0.0271424	-1.56635	4.2735	7.27049	0	0.492914	0	0.123229	0	0.0616143	0	0.0616143	0	0.854701	3.4188	0.369686	2.09489	4.80591	3.90625	7.85619	4.71698	6.76606	3.63636	6.37088	4.46927	8.33333	234	1623	0.714272	0.849498	KLn	LOSS	CDS	min15k.min10pr
FMR1_Targets_Darnell__GAIN	0.482118	0.0239382	0.0310151	1.50843	0.526238	0.0201834	0.0254376	1.59452	0.462476	0.0325835	0.0404722	1.39284	0.517771	0.018786	0.0245598	1.60978	9.40171	5.97659	2.13675	0.369686	0	0	0	0	0	0	1.7094	3.84615	3.84615	0.924214	2.95749	2.09489	10.9375	6.12517	7.54717	5.84862	7.27273	5.34699	10.0559	6.72043	234	1623	0.43244	0.630776	KLn	GAIN	CDS	min15k.min10pr
BspanVHM_PstNat__GAIN	0.181689	0.0991789	0.112812	0.947643	0.255793	0.0619486	0.0661162	1.17969	0.166372	0.148518	0.161561	0.791664	0.215424	0.0669766	0.0773578	1.1115	15.812	13.8632	4.70085	3.8817	1.7094	1.10906	1.7094	0.184843	1.28205	0.0616143	3.4188	7.26496	5.12821	1.91004	6.0382	5.91497	19.5312	12.9161	11.3208	14.6789	18.1818	12.8555	15.0838	15.0538	234	1623	0.550268	0.7502	KLn	GAIN	CDS	min15k.min10pr
Neurof_GoNervSysDev__GAIN	0.243191	0.116199	0.134592	0.87098	0.289938	0.0988836	0.1088	0.96337	0.218832	0.176596	0.191227	0.71845	0.293727	0.0804266	0.0932428	1.03038	12.8205	10.3512	2.5641	1.66359	0.42735	0.4313	0	0.123229	0	0.123229	2.5641	5.55556	4.70085	1.60197	4.80591	3.94331	16.4062	8.52197	8.49057	11.9266	20	10.5802	10.6145	10.0806	234	1623	0.550268	0.7502	KLn	GAIN	CDS	min15k.min10pr
FMR1_Targets_Ascano__GAIN	0.314888	0.115812	0.131738	0.880289	0.357908	0.100372	0.112543	0.948682	0.288791	0.158754	0.173858	0.759806	0.356514	0.0882773	0.101665	0.99283	8.54701	7.27049	1.7094	0.677757	0.854701	0.123229	0	0	0	0	1.28205	4.70085	2.5641	1.04744	3.57363	2.64941	9.375	6.65779	7.54717	7.79817	10.9091	7.50853	7.82123	6.98925	234	1623	0.550268	0.7502	KLn	GAIN	CDS	min15k.min10pr
Kirov_ARC__GAIN	1.63194	0.0862681	0.112878	0.947391	1.63083	0.0866931	0.113278	0.945855	1.57721	0.100073	0.126348	0.898432	1.6366	0.0893148	0.115724	0.936575	0.854701	0.184843	0	0	0	0	0	0	0	0	0	0	0.854701	0.0616143	0.0616143	0.0616143	0	0.133156	1.88679	0.229358	0	0.227531	1.11732	0.134409	234	1623	0.550268	0.7502	KLn	GAIN	CDS	min15k.min10pr
Neurof_UnionInclusive__GAIN	0.17711	0.139234	0.156105	0.806582	0.223677	0.11096	0.118685	0.925603	0.157178	0.214884	0.227125	0.643735	0.221536	0.0917252	0.103371	0.985601	19.2308	15.5884	4.2735	3.38879	0.854701	0.800986	0.42735	0.184843	0	0.123229	3.4188	7.26496	8.54701	2.21811	7.08564	6.28466	21.875	13.4487	16.0377	17.4312	23.6364	15.1308	17.8771	16.129	234	1623	0.550268	0.827383	KLn	GAIN	CDS	min15k.min10pr
Neurof_GoNeuronProj__GAIN	0.250492	0.202831	0.221714	0.654207	0.270936	0.194389	0.20947	0.678878	0.225252	0.258903	0.275361	0.560097	0.288379	0.16205	0.178361	0.748701	10.2564	7.3321	0.42735	0.800986	0.42735	0.184843	0	0.123229	0	0	1.7094	3.84615	4.70085	0.8626	2.83426	3.63524	10.1562	6.25832	10.3774	8.25688	7.27273	7.05347	11.1732	7.66129	234	1623	0.679577	0.841982	KLn	GAIN	CDS	min15k.min10pr
Neurof_UnionStringent__GAIN	0.237864	0.211264	0.229981	0.638307	0.260569	0.200191	0.215118	0.667323	0.209515	0.282365	0.297812	0.526058	0.270378	0.178289	0.194533	0.711008	9.40171	6.96242	1.28205	1.04744	0.42735	0.184843	0	0.123229	0	0	1.7094	3.84615	3.84615	1.04744	3.0191	2.89587	10.1562	5.99201	8.49057	7.79817	7.27273	6.59841	10.0559	7.39247	234	1623	0.679577	0.841982	KLn	GAIN	CDS	min15k.min10pr
PhHs_NervSys_ADX__GAIN	0.287205	0.231694	0.256812	0.590385	0.320709	0.221632	0.239056	0.6215	0.24871	0.311058	0.330189	0.481237	0.334468	0.183228	0.206115	0.685891	6.41026	4.68269	0.854701	0.246457	0	0.123229	0	0.123229	0	0	0.854701	3.84615	1.7094	0.4313	2.1565	2.09489	8.59375	3.86152	3.77358	5.38991	5.45455	4.43686	6.70391	4.97312	234	1623	0.679577	0.841982	KLn	GAIN	CDS	min15k.min10pr
GI_q4__GAIN	0.0952496	0.299635	0.313041	0.504399	0.129119	0.246981	0.253176	0.596578	0.0775598	0.420694	0.429634	0.366901	0.131949	0.195638	0.207585	0.682805	23.0769	21.2569	7.26496	5.91497	2.99145	1.66359	1.28205	0.739372	0.42735	0.246457	2.5641	11.1111	9.40171	2.27973	9.36537	9.61183	24.2188	17.1771	21.6981	24.7706	25.4545	20.0228	22.3464	22.7151	234	1623	0.679577	0.956133	KLn	GAIN	CDS	min15k.min10pr
HI_q2__GAIN	0.0825189	0.396257	0.405649	0.391849	0.151502	0.27234	0.278242	0.555577	0.0572481	0.590944	0.595254	0.225298	0.123636	0.255766	0.265937	0.575221	23.5043	22.5508	5.55556	6.09982	2.13675	1.91004	2.13675	0.492914	0.42735	0.123229	5.12821	8.97436	9.40171	3.0191	9.24214	10.2896	23.4375	20.506	23.5849	24.3119	25.4545	22.5256	22.905	22.5806	234	1623	0.709517	0.963511	KLn	GAIN	CDS	min15k.min10pr
GI_q1__GAIN	0.0390375	0.471421	0.489836	0.30995	0.068184	0.372504	0.384157	0.415491	0.0286304	0.614061	0.62449	0.204474	0.0514021	0.3659	0.388649	0.410443	23.9316	22.0579	7.26496	7.57856	2.5641	3.14233	2.13675	1.60197	1.7094	0.677757	2.99145	10.2564	10.6838	2.77264	9.79667	9.4886	25.7812	21.1718	21.6981	22.8211	20	21.843	25.1397	22.3118	234	1623	0.851826	0.963511	KLn	GAIN	CDS	min15k.min10pr
Kirov_NMDAR__GAIN	0.709435	0.393869	0.421732	0.374963	0.708252	0.394731	0.42251	0.374163	0.665801	0.424136	0.449518	0.347253	0.709598	0.394094	0.421874	0.374818	0.854701	0.369686	0	0	0	0	0	0	0	0	0	0	0.854701	0.0616143	0.184843	0.123229	0	0.266312	1.88679	0.458716	0	0.227531	1.11732	0.537634	234	1623	0.859243	0.956133	KLn	GAIN	CDS	min15k.min10pr
BspanVH_lg2rpkm4.74__GAIN	0.0624075	0.544148	0.551056	0.258805	0.0854175	0.501438	0.50444	0.297191	0.0419788	0.693733	0.696767	0.156913	0.0818445	0.451594	0.460169	0.337082	16.6667	16.2662	5.55556	4.99076	2.5641	1.66359	0.854701	0.677757	0.42735	0.184843	2.5641	6.83761	7.26496	1.41713	8.44116	6.40789	18.75	15.5792	14.1509	16.8578	20	16.1547	15.6425	16.3978	234	1623	0.859243	0.963511	KLn	GAIN	CDS	min15k.min10pr
Neurof_GoSynaptic__GAIN	0.216001	0.502534	0.51346	0.289493	0.219807	0.505001	0.515321	0.287923	0.173572	0.595911	0.603193	0.219544	0.235471	0.474687	0.486205	0.31318	4.2735	3.38879	0.42735	0.246457	0	0	0	0	0	0	1.28205	0.854701	2.13675	0.4313	1.54036	1.41713	4.6875	3.19574	3.77358	3.55505	3.63636	3.18544	4.46927	3.62903	234	1623	0.859243	0.963511	KLn	GAIN	CDS	min15k.min10pr
PhMm_CompleteLethality__GAIN	0.196455	0.518952	0.53014	0.275609	0.202654	0.520607	0.530638	0.275201	0.153252	0.619774	0.626559	0.203038	0.222779	0.476142	0.488034	0.31155	4.70085	4.25139	0.42735	0.246457	0	0.0616143	0	0	0	0	1.28205	1.7094	1.7094	0.8626	1.97166	1.41713	7.03125	3.06258	1.88679	5.27523	9.09091	4.20933	3.35196	4.30108	234	1623	0.859243	0.963511	KLn	GAIN	CDS	min15k.min10pr
PSD_BayesGrant_fullset__GAIN	0.108565	0.576474	0.582692	0.234561	0.120369	0.569789	0.574621	0.240618	0.0818066	0.678677	0.682241	0.166062	0.137336	0.495146	0.503039	0.298398	9.82906	8.87246	1.28205	1.04744	0.42735	0.123229	0	0.0616143	0	0	1.7094	3.84615	4.2735	1.04744	3.94331	3.8817	8.59375	8.52197	11.3208	9.17431	7.27273	8.75995	10.6145	9.00538	234	1623	0.859243	0.963511	KLn	GAIN	CDS	min15k.min10pr
PhMm_NeuroUnion_all__GAIN	0.0630624	0.600419	0.60606	0.217484	0.078819	0.578711	0.581412	0.235516	0.0317204	0.802046	0.803164	0.0951957	0.0894932	0.495898	0.502479	0.298882	17.9487	16.8207	4.2735	4.313	1.7094	1.04744	0	0.184843	0	0.123229	2.5641	8.54701	6.83761	2.1565	7.14726	7.51694	18.75	14.3808	16.9811	18.922	23.6364	16.2685	16.2011	17.4731	234	1623	0.859243	0.967812	KLn	GAIN	CDS	min15k.min10pr
Neurof_GoNervTransm__GAIN	0.157108	0.581085	0.587988	0.230631	0.160491	0.584664	0.590828	0.228539	0.111351	0.70149	0.704874	0.151888	0.16257	0.583593	0.589435	0.229564	5.98291	4.313	0	0.369686	0	0	0	0	0	0	1.28205	1.28205	3.4188	0.8626	1.84843	1.60197	6.25	3.59521	5.66038	4.93119	7.27273	3.52673	5.58659	5.24194	234	1623	0.859243	0.963511	KLn	GAIN	CDS	min15k.min10pr
HI_q1__GAIN	0.0259829	0.670252	0.677979	0.168784	0.0425666	0.617709	0.622188	0.206078	0.0129463	0.839682	0.841577	0.0749063	0.0377175	0.557315	0.56991	0.244194	20.0855	21.0721	5.55556	7.08564	2.99145	2.77264	2.13675	1.10906	1.28205	0.616143	3.84615	8.54701	7.69231	2.64941	9.30376	9.11892	21.0938	19.0413	18.8679	22.8211	10.9091	20.7053	22.905	21.5054	234	1623	0.859243	0.967812	KLn	GAIN	CDS	min15k.min10pr
Neurof_GoNervSysDev_CNS__GAIN	0.130075	0.617789	0.625939	0.203468	0.133171	0.622625	0.629475	0.201022	0.0903457	0.732935	0.736803	0.132649	0.160673	0.554859	0.564317	0.248477	5.98291	5.1756	0.42735	0.492914	0	0.184843	0	0.0616143	0	0	1.28205	2.13675	2.5641	0.985829	2.5878	1.60197	9.375	4.26099	1.88679	5.9633	9.09091	5.00569	5.02793	5.37634	234	1623	0.859243	0.963511	KLn	GAIN	CDS	min15k.min10pr
PhMm_NervSystem_all__GAIN	0.0650448	0.648127	0.652376	0.185502	0.0768221	0.63779	0.64022	0.193671	0.0282283	0.850274	0.850915	0.0701139	0.0888717	0.566041	0.570768	0.24354	14.5299	13.1855	2.99145	3.20394	0.42735	0.492914	0	0.184843	0	0.123229	2.13675	7.26496	5.12821	1.97166	5.42206	5.79174	17.1875	11.5846	11.3208	14.5642	20	13.3106	12.8492	13.0376	234	1623	0.859243	0.967812	KLn	GAIN	CDS	min15k.min10pr
BspanHM_lg2rpkm3.21__GAIN	0.0354149	0.693819	0.698482	0.155845	0.0460713	0.67661	0.679048	0.1681	0.0102001	0.915496	0.915839	0.0381808	0.0563329	0.569071	0.576632	0.239101	20.9402	22.8589	8.11966	6.53112	1.7094	1.7252	1.28205	0.800986	0.854701	0.308071	3.84615	9.82906	7.26496	3.08071	10.4128	9.36537	23.4375	21.5712	17.9245	23.9679	20	20.9329	21.2291	25.1344	234	1623	0.876125	0.967812	KLn	GAIN	CDS	min15k.min10pr
PhMm_NeuroBehav_all__GAIN	0.0495841	0.753327	0.756235	0.121343	0.0534116	0.759493	0.7612	0.118501	0.015033	0.925911	0.926141	0.033323	0.0706794	0.670277	0.674585	0.170963	11.5385	11.8916	3.4188	1.41713	0	0.369686	0	0.184843	0	0.123229	2.13675	3.84615	5.55556	1.23229	4.99076	5.66852	11.7188	10.1198	11.3208	13.4174	16.3636	11.149	10.0559	12.7688	234	1623	0.88043	0.967812	KLn	GAIN	CDS	min15k.min10pr
BspanLA_lg2rpkm.MIN__GAIN	0.0108327	0.79771	0.800459	0.0966609	0.0201282	0.764836	0.765798	0.115886	-0.0130754	0.802057	0.799254	-0.0973154	0.0201845	0.664908	0.671771	0.172779	21.3675	24.9538	11.5385	10.4128	5.55556	4.80591	3.84615	3.08071	2.99145	1.91004	2.99145	11.5385	6.83761	3.51201	10.2896	11.1522	21.0938	21.0386	21.6981	28.3257	16.3636	23.8908	22.905	26.2097	234	1623	0.88043	0.967812	KLn	GAIN	CDS	min15k.min10pr
GOP_lessthan500g__GAIN	0.00530394	0.867356	0.868095	0.0614328	0.0322979	0.7672	0.766144	0.115689	-0.0135485	0.723945	0.720939	-0.142101	0.0163979	0.668476	0.672629	0.172225	43.1624	46.4572	25.641	26.7406	16.6667	15.9581	10.6838	9.61183	6.83761	6.4695	7.26496	20.5128	15.3846	5.91497	20.9489	19.5933	46.0938	43.4088	39.6226	49.0826	40	44.4824	44.1341	48.7903	234	1623	0.88043	0.963511	KLn	GAIN	CDS	min15k.min10pr
PhMm_Aggr_Sensory_all__GAIN	0.0608717	0.773047	0.775054	0.110668	0.0629909	0.78188	0.783325	0.106058	0.0255193	0.905457	0.905787	0.042974	0.0795962	0.716964	0.719707	0.142844	8.54701	7.45533	0.854701	1.47874	0	0.0616143	0	0	0	0	1.28205	4.70085	2.5641	0.985829	2.46457	4.00493	10.1562	6.52463	6.60377	8.25688	10.9091	7.50853	7.82123	7.39247	234	1623	0.88043	0.967812	KLn	GAIN	CDS	min15k.min10pr
PhHs_MindFun_ADX__GAIN	0.217036	0.784255	0.788884	0.102987	0.211748	0.792063	0.796204	0.0989756	0.154545	0.845876	0.84823	0.0714864	0.228556	0.77373	0.778768	0.108592	0.854701	0.677757	0	0	0	0	0	0	0	0	0.42735	0.42735	0	0.184843	0.184843	0.308071	0	0.665779	1.88679	0.688073	0	0.682594	1.11732	0.672043	234	1623	0.88043	0.967812	KLn	GAIN	CDS	min15k.min10pr
PhHs_NervSys_All__GAIN	0.041455	0.793328	0.795653	0.0992766	0.0439482	0.802838	0.804222	0.0946242	0.0126808	0.937284	0.937487	0.0280347	0.0643734	0.698389	0.702518	0.153342	10.6838	10.6593	2.13675	1.84843	0.42735	0.308071	0.42735	0.184843	0	0.184843	0.854701	6.41026	3.4188	0.800986	5.05237	4.80591	13.2812	9.58722	7.54717	11.5826	10.9091	10.4664	10.6145	10.8871	234	1623	0.88043	0.967812	KLn	GAIN	CDS	min15k.min10pr
GI_q3__GAIN	0.0241512	0.812488	0.813736	0.0895164	0.0318837	0.810766	0.811376	0.0907777	-0.00694048	0.948916	0.948836	-0.0228091	0.0430728	0.697847	0.700557	0.154556	21.3675	20.3327	7.26496	5.73013	1.7094	1.66359	0	0.677757	0	0.246457	3.84615	11.5385	5.98291	2.77264	9.55022	8.00986	23.4375	19.0413	18.8679	21.445	20	20.0228	21.7877	20.6989	234	1623	0.88043	0.967812	KLn	GAIN	CDS	min15k.min10pr
PhMm_Aggr_CardvascMuscle_all__GAIN	0.0229084	0.883162	0.883718	0.0536862	0.0214296	0.902006	0.902246	0.0446749	-0.0168681	0.916729	0.916492	-0.0378712	0.0391755	0.813295	0.814429	0.0891469	13.2479	11.9532	1.7094	2.71103	0.854701	0.492914	0	0.123229	0	0.0616143	2.5641	5.98291	4.70085	1.78681	5.23722	4.92914	14.8438	10.7856	11.3208	12.9587	16.3636	10.694	12.2905	13.4409	234	1623	0.920291	0.967812	KLn	GAIN	CDS	min15k.min10pr
Neurof_GoNeuronBody__GAIN	0.0545683	0.913205	0.913938	0.0390835	0.0487344	0.923701	0.924236	0.0342173	0.0168055	0.973167	0.973236	0.0117816	0.0534258	0.915782	0.916433	0.0378995	1.7094	1.60197	0	0.246457	0	0	0	0	0	0	0	0.854701	0.854701	0.246457	0.369686	0.985829	2.34375	1.73103	0.943396	1.49083	1.81818	1.93402	1.67598	1.20968	234	1623	0.924236	0.973236	KLn	GAIN	CDS	min15k.min10pr
BspanVHM_EqlNat__GAIN	-0.0107185	0.937654	0.937451	-0.0280515	-0.0215682	0.891104	0.890733	-0.0502524	-0.0483535	0.735405	0.732115	-0.13542	0.00692973	0.962729	0.962788	0.0164692	13.6752	14.4177	2.99145	3.26556	0.854701	0.924214	0.42735	0.246457	0.42735	0.0616143	3.4188	5.12821	5.12821	2.03327	6.9008	5.48367	14.8438	13.1824	12.2642	15.4817	12.7273	13.5381	13.9665	15.457	234	1623	0.920291	0.963511	KLn	GAIN	CDS	min15k.min10pr
PhMm_Aggr_SkeCranioLimbs_all__GAIN	-0.0171117	0.91783	0.916676	-0.0377843	-0.0260177	0.884958	0.882963	-0.0540576	-0.0566519	0.742663	0.731796	-0.13561	-0.0072382	0.96581	0.96561	-0.0151984	9.40171	10.1664	0.854701	1.47874	0.854701	0.123229	0	0.0616143	0	0.0616143	1.7094	4.2735	3.4188	1.17067	4.68269	4.313	11.7188	8.1225	6.60377	11.9266	16.3636	10.3527	7.26257	9.94624	234	1623	0.920291	0.963511	KLn	GAIN	CDS	min15k.min10pr
PhHs_MindFun_All__GAIN	-0.13496	0.714382	0.709295	-0.149173	-0.149434	0.692418	0.687157	-0.162944	-0.169849	0.645617	0.638032	-0.195157	-0.118216	0.751048	0.747301	-0.126505	2.99145	3.69686	0.42735	0.246457	0	0	0	0	0	0	0.42735	1.28205	1.28205	0.369686	1.35551	1.97166	2.34375	4.12783	3.77358	3.32569	3.63636	3.6405	2.7933	3.76344	234	1623	0.876125	0.963511	KLn	GAIN	CDS	min15k.min10pr
BspanVHM_PreNat__GAIN	-0.0576696	0.686708	0.683116	-0.165505	-0.0772822	0.624425	0.621192	-0.206774	-0.0862275	0.554589	0.547939	-0.261268	-0.0480463	0.745665	0.743497	-0.128721	12.8205	14.2329	2.99145	3.20394	1.28205	0.8626	0.42735	0.184843	0	0	0.854701	6.83761	5.12821	1.41713	6.9008	5.91497	16.4062	13.8482	8.49057	14.5642	12.7273	13.9932	12.8492	14.5161	234	1623	0.859243	0.963511	KLn	GAIN	CDS	min15k.min10pr
HI_q4__GAIN	-0.0515175	0.668263	0.663968	-0.177853	-0.0755775	0.583958	0.580376	-0.236291	-0.0923617	0.463195	0.453988	-0.342956	-0.0428566	0.742413	0.740231	-0.130633	17.094	19.2237	4.2735	4.68269	1.7094	1.2939	0.854701	0.369686	0.42735	0.184843	2.99145	8.54701	5.55556	2.77264	9.30376	7.14726	19.5312	17.3103	14.1509	20.8716	14.5455	17.5199	17.8771	21.2366	234	1623	0.859243	0.956133	KLn	GAIN	CDS	min15k.min10pr
SynKEGG_Glutamatergic__GAIN	-0.639381	0.544715	0.509632	-0.292743	-0.643774	0.54224	0.5069	-0.295078	-0.644597	0.541416	0.505857	-0.295973	-0.626549	0.552968	0.519097	-0.284752	0.42735	0.677757	0	0	0	0	0	0	0	0	0	0	0.42735	0.0616143	0.308071	0.308071	0	0.266312	0.943396	1.03211	0	0.341297	0.558659	1.07527	234	1623	0.859243	0.963511	KLn	GAIN	CDS	min15k.min10pr
SynKEGG_GABAergic__GAIN	-0.672184	0.522733	0.483748	-0.315381	-0.68008	0.518561	0.479208	-0.319476	-0.693912	0.509564	0.468693	-0.329112	-0.667393	0.526372	0.488161	-0.311437	0.42735	0.8626	0	0	0	0	0	0	0	0	0	0.42735	0	0	0.4313	0.4313	0.78125	0.665779	0	1.03211	0	0.910125	0.558659	0.806452	234	1623	0.859243	0.956133	KLn	GAIN	CDS	min15k.min10pr
Neurof_KeggSynaptic__GAIN	-0.343367	0.468358	0.447957	-0.348764	-0.353501	0.458594	0.437969	-0.358557	-0.3652	0.441524	0.419435	-0.377336	-0.33651	0.478891	0.45939	-0.337819	2.13675	2.52619	0	0.123229	0	0	0	0	0	0	0	0.42735	1.7094	0.123229	1.23229	1.17067	1.5625	1.86418	2.83019	3.09633	3.63636	1.59272	1.67598	3.62903	234	1623	0.859243	0.956133	KLn	GAIN	CDS	min15k.min10pr
PhMm_Aggr_DigestHepato_all__GAIN	-0.16646	0.427875	0.413244	-0.383793	-0.199487	0.374202	0.360394	-0.443222	-0.205483	0.334965	0.317327	-0.498493	-0.163076	0.451516	0.43908	-0.357456	7.69231	9.73506	1.28205	1.97166	0	0.184843	0	0.0616143	0	0	0.42735	3.84615	3.4188	1.47874	4.12816	4.12816	10.9375	6.9241	3.77358	12.156	10.9091	10.0114	6.70391	9.4086	234	1623	0.835459	0.841982	KLn	GAIN	CDS	min15k.min10pr
Neurof_PathwaysAxonG__GAIN	-0.494203	0.397985	0.359409	-0.444411	-0.506717	0.388169	0.349757	-0.456233	-0.530868	0.365356	0.323807	-0.489713	-0.493241	0.402058	0.364788	-0.437959	1.28205	2.03327	0	0.308071	0	0	0	0	0	0	0.42735	0.42735	0.42735	0.4313	0.924214	0.677757	2.34375	1.46471	0	2.52294	1.81818	1.93402	1.11732	2.15054	234	1623	0.835459	0.841982	KLn	GAIN	CDS	min15k.min10pr
BspanML_lg2rpkm0.93__GAIN	-0.0739025	0.40596	0.393966	-0.404541	-0.127272	0.254045	0.246302	-0.608531	-0.104616	0.258073	0.243678	-0.613184	-0.0742886	0.441691	0.432391	-0.364123	25.2137	25.3851	6.83761	8.68762	2.99145	3.63524	0.42735	1.47874	0.42735	0.739372	4.2735	12.3932	8.54701	3.26556	11.7067	10.4128	24.2188	21.9707	26.4151	28.3257	21.8182	23.8908	26.257	27.1505	234	1623	0.679577	0.828504	KLn	GAIN	CDS	min15k.min10pr
PhMm_Aggr_IntegAdipPigm_all__GAIN	-0.220633	0.26403	0.244765	-0.611251	-0.253096	0.224794	0.206831	-0.684384	-0.265422	0.187868	0.168231	-0.774095	-0.224733	0.273769	0.256663	-0.590637	8.97436	10.0431	0.854701	2.64941	0	0.308071	0	0	0	0	2.99145	1.28205	4.70085	1.2939	4.06654	4.68269	8.59375	8.78828	9.43396	11.1239	12.7273	9.21502	7.82123	11.0215	234	1623	0.679577	0.7502	KLn	GAIN	CDS	min15k.min10pr
SynKEGG_Dopaminergic__GAIN	-1.10578	0.275586	0.189307	-0.722834	-1.11715	0.2716	0.185562	-0.731511	-1.12438	0.267868	0.181019	-0.742275	-1.09089	0.282628	0.197454	-0.704534	0.42735	1.04744	0	0.0616143	0	0	0	0	0	0	0	0	0.42735	0	0.492914	0.554529	0.78125	0.665779	0	1.37615	1.81818	0.455063	0	1.74731	234	1623	0.679577	0.7502	KLn	GAIN	CDS	min15k.min10pr
PhMm_Aggr_EndoExocrRepr_all__GAIN	-0.208533	0.223507	0.203715	-0.690976	-0.277007	0.148574	0.13443	-0.871504	-0.29164	0.111254	0.0930386	-1.03134	-0.21723	0.23246	0.214978	-0.667607	11.5385	12.939	1.7094	2.77264	0	0.492914	0	0.0616143	0	0.0616143	2.99145	3.84615	4.70085	2.03327	5.42206	5.48367	15.625	10.7856	6.60377	14.7936	9.09091	11.4903	12.2905	14.6505	234	1623	0.571328	0.7502	KLn	GAIN	CDS	min15k.min10pr
HI_q3__GAIN	-0.134399	0.245473	0.223897	-0.649952	-0.213581	0.126349	0.114245	-0.942162	-0.17421	0.145853	0.124904	-0.903425	-0.142299	0.248291	0.228898	-0.640358	17.5214	20.3943	4.2735	5.54529	2.13675	1.66359	0.854701	0.616143	0	0.308071	2.99145	8.97436	5.55556	2.77264	9.98152	7.64017	21.0938	18.6418	13.2075	21.9037	14.5455	18.3163	18.4358	22.8495	234	1623	0.550268	0.7502	KLn	GAIN	CDS	min15k.min10pr
SynKEGG_Serotonergic__GAIN	-13.7492	0.974136	0.0634478	-1.19758	-13.7604	0.974112	0.0624691	-1.20433	-13.7627	0.974102	0.0618408	-1.20872	-13.7445	0.974128	0.0639407	-1.19422	0	0.677757	0	0	0	0	0	0	0	0	0	0	0	0	0.4313	0.246457	0	0.532623	0	0.802752	0	0.455063	0	0.94086	234	1623	0.550268	0.630776	KLn	GAIN	CDS	min15k.min10pr
PhMm_Aggr_HematoImmune_all__GAIN	-0.262228	0.100774	0.0800626	-1.09657	-0.329803	0.0582287	0.0455816	-1.34121	-0.295834	0.0679166	0.0505742	-1.29607	-0.269631	0.104395	0.0856402	-1.06732	11.9658	14.9107	1.28205	4.55946	0.42735	1.41713	0	0.4313	0	0.123229	2.13675	5.55556	4.2735	1.78681	6.0382	7.08564	11.7188	11.4514	12.2642	17.8899	12.7273	15.0171	11.7318	14.7849	234	1623	0.550268	0.630776	KLn	GAIN	CDS	min15k.min10pr
GI_q2__GAIN	-0.202826	0.105334	0.0803475	-1.09503	-0.321204	0.0331843	0.0237381	-1.62455	-0.252208	0.0525857	0.0350827	-1.45491	-0.218044	0.0995805	0.0775995	-1.11014	11.5385	18.2378	2.99145	5.54529	1.7094	1.97166	1.28205	0.8626	0.854701	0.554529	3.84615	4.70085	2.99145	2.21811	9.73506	6.28466	10.1562	17.3103	13.2075	19.0367	10.9091	17.5199	11.7318	19.086	234	1623	0.43244	0.630776	KLn	GAIN	CDS	min15k.min10pr
SynKEGG_Cholinergic__GAIN	-13.7821	0.966123	0.0137616	-1.86133	-13.8015	0.966057	0.0132222	-1.8787	-13.8045	0.966044	0.0128504	-1.89108	-13.783	0.966063	0.0136794	-1.86393	0	1.17067	0	0	0	0	0	0	0	0	0	0	0	0.0616143	0.739372	0.369686	0	0.798935	0	1.49083	0	0.682594	0	1.74731	234	1623	0.43244	0.630776	KLn	GAIN	CDS	min15k.min10pr
PhMm_Aggr_IntegAdipPigm_all__LOSS	0.287315	0.164079	0.207539	0.682901	1.45749	0.00214372	0.00339322	2.46939	1.15293	0.00483896	0.0084622	2.07252	1.01629	0.00417269	0.0114908	1.93965	3.3195	0.963855	0	0.180723	0	0.060241	0	0.060241	0	0.060241	0	0.414938	2.90456	0.120482	0.301205	0.542169	3.81679	0.78534	2.72727	1.11607	8.77193	1.10988	1.63043	0.790514	241	1660	0.169661	0.42311	KLy	LOSS	Transcript	min15k.min10pr
PhMm_Aggr_EndoExocrRepr_all__LOSS	0.210256	0.166395	0.207663	0.68264	0.726027	0.00950072	0.0129535	1.88761	0.573416	0.0222662	0.0292729	1.53353	0.540378	0.0249241	0.0353659	1.45142	6.639	4.15663	1.24481	0.361446	0.414938	0.060241	0	0.060241	0	0.060241	0.414938	2.07469	4.14938	0.240964	1.20482	2.71084	7.63359	4.58115	5.45455	3.79464	7.01754	3.88457	6.52174	4.47958	241	1660	0.66063	0.884645	KLy	LOSS	CDS	min15k.min10pr
PhMm_Aggr_EndoExocrRepr_all__LOSS	0.158044	0.385595	0.442486	0.354101	1.06655	0.0234627	0.0273719	1.56269	0.866208	0.037979	0.0452484	1.3444	0.751186	0.0334066	0.0538046	1.26918	2.48963	1.26506	0.414938	0.120482	0.414938	0.060241	0	0.060241	0	0.060241	0.414938	1.24481	0.829876	0.240964	0.481928	0.542169	3.81679	1.04712	0.909091	1.45089	3.50877	1.22087	2.17391	1.31752	241	1660	0.456712	0.761902	KLy	LOSS	Transcript	min15k.min10pr
Kirov_ARC__ALL	1.61868	0.0367579	0.0542367	1.26571	1.61672	0.0369556	0.0544679	1.26386	1.60859	0.0383009	0.0558661	1.25285	1.63042	0.0357909	0.0531505	1.27449	1.24481	0.301205	0	0	0	0	0	0	0	0	0	0	1.24481	0.060241	0.120482	0.120482	0.763359	0.13089	1.81818	0.446429	0	0.443951	1.63043	0.131752	241	1660	0.383237	0.638825	KLy	GAIN.LOSS	CDS	min15k.min10pr
Neurof_GoNervTransm__ALL	0.31879	0.0587331	0.0724076	1.14022	0.391601	0.0505562	0.0558426	1.25303	0.342942	0.0893782	0.0965996	1.01502	0.404762	0.0392546	0.0450705	1.34611	9.54357	6.3253	1.65975	0.60241	0.414938	0.060241	0.414938	0.060241	0.414938	0.060241	2.48963	2.90456	4.14938	1.44578	2.46988	2.40964	9.92366	5.2356	9.09091	7.25446	10.5263	5.21643	9.23913	7.64163	241	1660	0.383237	0.638825	KLy	GAIN.LOSS	CDS	min15k.min10pr
Neurof_GoNeuronProj__ALL	0.199787	0.0825987	0.107371	0.969114	0.324087	0.0507808	0.0562594	1.2498	0.238037	0.129811	0.137492	0.861723	0.268393	0.056106	0.067327	1.17181	13.6929	9.81928	2.48963	1.3253	1.24481	0.481928	0	0.301205	0	0.060241	3.3195	4.97925	5.39419	1.56627	3.25301	5	13.7405	8.50785	13.6364	10.9375	12.2807	9.76693	14.1304	9.88142	241	1660	0.383237	0.638825	KLy	GAIN.LOSS	CDS	min15k.min10pr
Neurof_UnionStringent__ALL	0.17434	0.0925583	0.118874	0.924913	0.294684	0.0556071	0.0601156	1.22101	0.214658	0.143381	0.150312	0.823007	0.249509	0.05793	0.0675811	1.17017	12.8631	9.57831	2.90456	1.62651	1.24481	0.481928	0.414938	0.301205	0.414938	0.120482	3.3195	4.97925	4.56432	1.74699	3.49398	4.33735	13.7405	8.11518	11.8182	10.8259	12.2807	9.43396	13.0435	9.74967	241	1660	0.383237	0.638825	KLy	GAIN.LOSS	CDS	min15k.min10pr
BspanVHM_PstNat__ALL	0.0951979	0.147357	0.174107	0.759185	0.192232	0.0745373	0.0768555	1.11432	0.0967137	0.236074	0.248106	0.605362	0.123709	0.112808	0.126049	0.89946	24.4813	19.8193	8.29876	6.14458	2.90456	2.22892	2.07469	0.722892	1.24481	0.60241	4.56432	9.54357	10.3734	2.83133	7.89157	9.09639	26.7176	19.7644	21.8182	19.8661	29.8246	18.313	22.8261	21.6074	241	1660	0.387982	0.665937	KLy	GAIN.LOSS	CDS	min15k.min10pr
FMR1_Targets_Ascano__ALL	0.279081	0.0874887	0.102439	0.989536	0.349992	0.0702181	0.0790716	1.10198	0.271707	0.12996	0.141394	0.849569	0.316734	0.0738648	0.0837564	1.07698	12.0332	10.1205	2.48963	0.963855	0.829876	0.240964	0	0.060241	0	0.060241	1.65975	5.39419	4.97925	1.74699	4.39759	3.9759	12.9771	9.42408	10.9091	10.7143	15.7895	10.3219	10.8696	9.88142	241	1660	0.387982	0.638825	KLy	GAIN.LOSS	CDS	min15k.min10pr
PhMm_NeuroUnion_all__ALL	0.0897802	0.164153	0.189637	0.722076	0.162831	0.101907	0.104392	0.981334	0.0941923	0.261457	0.270748	0.567435	0.123758	0.119084	0.129219	0.888675	26.556	24.0964	9.54357	6.98795	4.56432	2.10843	0.829876	0.60241	0.414938	0.421687	4.56432	12.0332	9.95851	3.49398	9.51807	11.0843	28.2443	21.2042	24.5455	26.5625	31.5789	23.0855	25	25.2964	241	1660	0.422319	0.665937	KLy	GAIN.LOSS	CDS	min15k.min10pr
Neurof_GoSynaptic__ALL	0.33085	0.105045	0.122409	0.912188	0.382505	0.0978359	0.109278	0.961469	0.32201	0.15683	0.170361	0.768631	0.376946	0.0874307	0.100321	0.99861	6.639	5	1.65975	0.60241	0.414938	0.120482	0.414938	0.060241	0	0	1.65975	2.07469	2.90456	0.843373	1.86747	2.28916	7.63359	4.71204	5.45455	5.24554	7.01754	4.77248	6.52174	5.27009	241	1660	0.422319	0.662126	KLy	GAIN.LOSS	CDS	min15k.min10pr
PhHs_NervSys_ADX__ALL	0.260881	0.142657	0.161965	0.79058	0.282061	0.143957	0.158868	0.798964	0.241778	0.196138	0.212335	0.672978	0.284194	0.128086	0.145508	0.837113	8.29876	6.44578	1.24481	0.542169	0.414938	0.301205	0.414938	0.180723	0.414938	0	1.65975	4.56432	2.07469	1.14458	2.53012	2.77108	10.687	4.97382	5.45455	7.70089	8.77193	6.10433	8.15217	6.85112	241	1660	0.493543	0.662126	KLy	GAIN.LOSS	CDS	min15k.min10pr
PhMm_CompleteLethality__ALL	0.324966	0.151661	0.1701	0.769295	0.357202	0.149548	0.164514	0.783796	0.302199	0.215563	0.231275	0.635872	0.356083	0.137511	0.152767	0.81597	7.88382	5.84337	0.829876	0.542169	0	0.120482	0	0	0	0	1.65975	2.07469	4.14938	1.20482	2.3494	2.28916	10.687	3.79581	4.54545	7.58929	15.7895	5.4384	5.43478	6.32411	241	1660	0.493543	0.662126	KLy	GAIN.LOSS	CDS	min15k.min10pr
PhMm_NeuroBehav_all__ALL	0.104475	0.22516	0.249125	0.603582	0.152536	0.188167	0.196478	0.706686	0.0971418	0.35163	0.362416	0.440793	0.132209	0.184825	0.198753	0.701686	19.0871	17.5904	5.80913	2.89157	1.65975	0.843373	0.414938	0.481928	0.414938	0.301205	3.73444	6.22407	9.12863	2.53012	6.44578	8.61446	20.6107	15.1832	17.2727	19.6429	22.807	16.7592	17.9348	18.5771	241	1660	0.534162	0.770134	KLy	GAIN.LOSS	CDS	min15k.min10pr
PhMm_NervSystem_all__ALL	0.0897162	0.251705	0.281396	0.550681	0.155244	0.195654	0.199001	0.701144	0.085413	0.41315	0.420133	0.376614	0.125256	0.196838	0.209709	0.678384	21.1618	19.0964	7.88382	4.6988	1.24481	1.0241	0.414938	0.481928	0.414938	0.301205	3.73444	10.3734	7.05394	3.01205	7.71084	8.37349	23.6641	17.1466	18.1818	20.7589	26.3158	18.535	19.5652	19.7628	241	1660	0.534162	0.803816	KLy	GAIN.LOSS	CDS	min15k.min10pr
GI_q4__ALL	0.0616821	0.299885	0.324976	0.488148	0.112558	0.228974	0.232116	0.634295	0.0531716	0.479211	0.484567	0.314646	0.08306	0.247415	0.260031	0.584974	32.7801	30.5422	12.0332	9.87952	5.80913	3.13253	2.90456	1.44578	0.829876	0.843373	4.97925	13.6929	14.1079	3.61446	12.6506	14.2771	34.3511	27.2251	30.9091	33.3705	35.0877	28.8568	32.0652	32.5428	241	1660	0.544873	0.852169	KLy	GAIN.LOSS	CDS	min15k.min10pr
Neurof_GoNeuronBody__ALL	0.37618	0.214399	0.230645	0.637056	0.39319	0.221178	0.235043	0.628852	0.339704	0.286218	0.29847	0.5251	0.415053	0.190258	0.206564	0.684946	2.90456	2.3494	0.414938	0.240964	0.414938	0	0.414938	0	0	0	0.414938	1.24481	1.24481	0.60241	0.481928	1.26506	3.05344	2.48691	2.72727	2.23214	3.50877	2.77469	2.71739	1.84453	241	1660	0.544873	0.691907	KLy	GAIN.LOSS	CDS	min15k.min10pr
Neurof_GoNervSysDev_CNS__ALL	0.19797	0.265146	0.284343	0.546158	0.221596	0.26898	0.281501	0.550519	0.172111	0.387647	0.397949	0.400172	0.228963	0.238435	0.252493	0.59775	9.54357	8.07229	1.24481	0.963855	0.414938	0.301205	0.414938	0.120482	0	0.060241	2.48963	2.90456	4.14938	1.74699	3.25301	3.07229	12.9771	7.06806	5.45455	8.92857	12.2807	8.10211	8.69565	8.03689	241	1660	0.570538	0.803816	KLy	GAIN.LOSS	CDS	min15k.min10pr
PhHs_NervSys_All__ALL	0.116402	0.297322	0.312086	0.505726	0.141753	0.287023	0.295873	0.528895	0.0989944	0.416913	0.42555	0.37105	0.132684	0.271987	0.283532	0.547398	17.8423	16.506	3.73444	3.49398	1.65975	0.783133	0.829876	0.361446	0.414938	0.240964	2.07469	7.88382	7.88382	1.80723	7.28916	7.40964	20.6107	15.3141	14.5455	17.5223	17.5439	16.4262	17.9348	16.6008	241	1660	0.570538	0.803816	KLy	GAIN.LOSS	CDS	min15k.min10pr
BspanHM_lg2rpkm3.21__ALL	0.0463949	0.377502	0.405073	0.392467	0.0910082	0.305452	0.307553	0.51208	0.0346798	0.616602	0.620205	0.207465	0.063414	0.321338	0.336628	0.472849	31.1203	31.2651	13.278	10.3012	5.39419	3.25301	2.90456	1.62651	1.65975	0.783133	5.80913	13.278	12.0332	4.6988	12.7711	13.7952	32.0611	30.6283	30	31.808	29.8246	28.5239	31.5217	34.5191	241	1660	0.570538	0.907472	KLy	GAIN.LOSS	CDS	min15k.min10pr
HI_q2__ALL	0.0449521	0.457928	0.477957	0.320611	0.100551	0.364114	0.36688	0.435476	0.0269287	0.732397	0.734177	0.134199	0.0607089	0.405228	0.416927	0.37994	34.0249	31.6265	10.3734	10.1205	3.3195	3.19277	2.90456	1.20482	1.24481	0.662651	7.05394	11.6183	15.3527	4.45783	12.7108	14.4578	35.1145	30.8901	32.7273	32.2545	35.0877	30.8546	33.6957	32.5428	241	1660	0.645203	0.922834	KLy	GAIN.LOSS	CDS	min15k.min10pr
GOP_lessthan500g__ALL	0.00728012	0.70123	0.711162	0.148032	0.0621987	0.501815	0.498084	0.302698	-0.00674308	0.811832	0.811025	-0.0909656	0.0116882	0.637449	0.644462	0.190802	59.3361	63.494	37.7593	38.6145	27.3859	23.0723	17.0124	14.759	10.3734	10.241	9.95851	26.1411	23.2365	8.01205	27.1687	28.3133	61.0687	63.2199	57.2727	63.7277	56.1404	60.4883	60.3261	67.0619	241	1660	0.778976	0.969212	KLy	GAIN.LOSS	CDS	min15k.min10pr
GI_q1__ALL	0.0305834	0.510701	0.522811	0.281656	0.0431885	0.502524	0.509245	0.293073	0.0213807	0.670095	0.675868	0.170138	0.0341645	0.491992	0.503975	0.297591	36.9295	34.4578	11.6183	12.2289	4.56432	5.24096	3.3195	2.59036	2.07469	1.3253	4.97925	11.6183	20.332	4.45783	13.012	16.988	39.6947	34.8168	33.6364	34.1518	28.0702	33.2963	39.6739	35.8366	241	1660	0.778976	0.910792	KLy	GAIN.LOSS	CDS	min15k.min10pr
SynKEGG_GABAergic__ALL	0.333625	0.488562	0.504078	0.297502	0.323763	0.512661	0.525875	0.279117	0.248208	0.626834	0.63401	0.197904	0.361465	0.468399	0.48402	0.315137	0.829876	0.963855	0.414938	0	0.414938	0	0	0	0	0	0.414938	0.414938	0	0.060241	0.421687	0.481928	1.52672	0.78534	0	1.11607	0	0.99889	1.08696	0.922266	241	1660	0.778976	0.907472	KLy	GAIN.LOSS	CDS	min15k.min10pr
BspanVH_lg2rpkm4.74__ALL	0.0342069	0.549378	0.568415	0.245334	0.0583639	0.53459	0.538102	0.269135	0.0132994	0.853995	0.854952	0.0680581	0.0440859	0.506302	0.519894	0.284085	23.6515	21.747	8.71369	7.04819	3.73444	2.89157	1.65975	1.50602	1.24481	0.662651	3.73444	9.95851	9.95851	2.59036	10.3614	8.79518	25.9542	22.1204	20.9091	21.4286	29.8246	21.7536	21.7391	21.7391	241	1660	0.778976	0.969212	KLy	GAIN.LOSS	CDS	min15k.min10pr
HI_q1__ALL	0.0309408	0.546162	0.556503	0.254533	0.0438923	0.544208	0.549866	0.259743	0.018949	0.738313	0.741887	0.129663	0.0358164	0.520335	0.53042	0.27538	30.2905	31.1446	10.3734	11.6265	5.39419	4.81928	3.3195	1.86747	2.48963	1.26506	5.39419	11.2033	13.6929	3.91566	12.4699	14.759	32.0611	29.3194	28.1818	32.7009	22.807	31.5205	32.6087	30.6983	241	1660	0.778976	0.922834	KLy	GAIN.LOSS	CDS	min15k.min10pr
PSD_BayesGrant_fullset__ALL	0.0866672	0.548261	0.557287	0.253921	0.0957665	0.57901	0.582717	0.234542	0.0543439	0.726358	0.728598	0.137512	0.0942913	0.537241	0.544157	0.264275	14.9378	12.1084	1.65975	1.98795	0.414938	0.481928	0	0.301205	0	0.180723	2.07469	4.97925	7.88382	1.62651	4.93976	5.54217	12.9771	11.3874	17.2727	12.7232	12.2807	11.3208	15.7609	13.0435	241	1660	0.803205	0.922834	KLy	GAIN.LOSS	CDS	min15k.min10pr
BspanVHM_EqlNat__ALL	0.0447477	0.579823	0.597669	0.223539	0.0648136	0.598459	0.600539	0.221459	0.0104547	0.920926	0.921094	0.035696	0.0593666	0.536473	0.547695	0.261461	20.332	19.8193	5.39419	4.75904	2.07469	1.50602	0.829876	0.481928	0.829876	0.180723	4.56432	7.05394	8.71369	3.07229	8.55422	8.19277	22.1374	18.3246	18.1818	21.0938	19.2982	18.7569	20.6522	21.0804	241	1660	0.805986	0.969212	KLy	GAIN.LOSS	CDS	min15k.min10pr
PhMm_Aggr_Sensory_all__ALL	0.0674072	0.632966	0.638761	0.194662	0.068369	0.678675	0.681334	0.16664	0.0274528	0.861117	0.861631	0.0646786	0.0790055	0.606554	0.610883	0.214042	12.4481	12.1084	2.48963	2.28916	0.414938	0.301205	0.414938	0.120482	0.414938	0.060241	2.48963	5.39419	4.56432	1.86747	4.03614	6.20482	16.0305	11.6492	8.18182	12.5	15.7895	11.8757	11.413	12.3847	241	1660	0.890975	0.969212	KLy	GAIN.LOSS	CDS	min15k.min10pr
BspanLA_lg2rpkm.MIN__ALL	0.0114216	0.755555	0.758931	0.119797	0.0109205	0.835895	0.836691	0.077435	-0.00318555	0.942234	0.94203	-0.0259353	0.0139447	0.736958	0.740425	0.130519	34.4398	35.8434	17.0124	15.7831	8.71369	7.53012	5.39419	4.57831	3.73444	2.83133	4.56432	14.5228	15.3527	5.06024	13.9157	16.8675	32.8244	32.9843	36.3636	38.2812	29.8246	34.1842	35.8696	37.8129	241	1660	0.926649	0.969212	KLy	GAIN.LOSS	CDS	min15k.min10pr
Kirov_NMDAR__ALL	0.172152	0.815495	0.819792	0.0862964	0.134847	0.859911	0.861914	0.0645362	-0.0305457	0.969303	0.969212	-0.0135813	0.187473	0.804895	0.809044	0.0920281	0.829876	0.722892	0	0.060241	0	0	0	0	0	0	0	0	0.829876	0.240964	0.240964	0.240964	0	0.65445	1.81818	0.78125	0	0.776915	1.08696	0.658762	241	1660	0.926649	0.969212	KLy	GAIN.LOSS	CDS	min15k.min10pr
Neurof_KeggSynaptic__ALL	0.0635089	0.830106	0.832025	0.0798637	0.043698	0.891383	0.891883	0.049692	-0.0288657	0.928408	0.928203	-0.0323572	0.0708269	0.818879	0.820492	0.0859256	3.73444	3.55422	0.414938	0.240964	0.414938	0.060241	0	0.060241	0	0	0.414938	0.414938	2.90456	0.481928	1.3253	1.74699	3.05344	2.87958	4.54545	4.12946	3.50877	2.88568	3.80435	4.34783	241	1660	0.926649	0.969212	KLy	GAIN.LOSS	CDS	min15k.min10pr
PhHs_MindFun_All__ALL	0.0467244	0.851949	0.852809	0.069148	0.033526	0.897598	0.897972	0.0467371	0.0106242	0.96698	0.967023	0.0145633	0.0462854	0.855652	0.856433	0.0673067	6.22407	6.74699	1.24481	0.481928	0	0	0	0	0	0	1.24481	2.07469	2.90456	0.843373	2.28916	3.61446	5.34351	6.5445	7.27273	6.91964	5.26316	6.65927	6.52174	6.85112	241	1660	0.926649	0.969212	KLy	GAIN.LOSS	CDS	min15k.min10pr
PhMm_Aggr_IntegAdipPigm_all__ALL	0.0272756	0.82485	0.826385	0.0828176	0.0168865	0.908287	0.908479	0.041685	-0.0203667	0.883983	0.883643	-0.0537233	0.0321123	0.81152	0.812556	0.0901465	17.0124	14.759	2.07469	3.91566	0.829876	0.722892	0.414938	0.180723	0.414938	0.120482	4.56432	2.48963	9.95851	2.3494	5.18072	7.22892	19.084	12.9581	14.5455	16.2946	22.807	13.9845	15.2174	15.6785	241	1660	0.926649	0.969212	KLy	GAIN.LOSS	CDS	min15k.min10pr
PhHs_MindFun_ADX__ALL	0.0118109	0.985209	0.985228	0.00646336	-0.0234192	0.971539	0.971472	-0.0125697	-0.112897	0.866179	0.864619	-0.063175	0.01171	0.985554	0.985572	0.0063118	1.24481	1.14458	0	0	0	0	0	0	0	0	0.829876	0.414938	0	0.361446	0.301205	0.481928	0.763359	1.04712	1.81818	1.22768	0	0.99889	1.63043	1.31752	241	1660	0.971472	0.969212	KLy	GAIN.LOSS	CDS	min15k.min10pr
PhMm_Aggr_EndoExocrRepr_all__ALL	0.00408725	0.970942	0.97099	0.012785	-0.0215809	0.883208	0.882991	-0.0540438	-0.0537974	0.681311	0.678629	-0.168368	0.00451419	0.970914	0.970942	0.0128067	18.2573	17.6506	4.56432	3.85542	1.24481	0.963855	0.414938	0.301205	0	0.240964	4.14938	6.22407	7.88382	2.89157	7.10843	7.6506	22.9008	15.8377	12.7273	19.1964	15.7895	16.2042	19.0217	19.3676	241	1660	0.926649	0.910792	KLy	GAIN.LOSS	CDS	min15k.min10pr
GI_q3__ALL	0.0050935	0.93958	0.940029	0.0268586	-0.0163515	0.875571	0.875338	-0.0578241	-0.0371707	0.643292	0.640569	-0.193434	0.00692982	0.928701	0.929036	0.0319675	29.0456	27.1084	9.54357	8.43373	2.48963	2.6506	0.829876	1.38554	0.414938	0.843373	4.97925	14.1079	9.95851	4.03614	11.6867	11.3855	32.0611	25.9162	25.4545	28.125	33.3333	26.859	27.7174	27.4045	241	1660	0.926649	0.907472	KLy	GAIN.LOSS	CDS	min15k.min10pr
PhMm_Aggr_DigestHepato_all__ALL	-0.0122099	0.930135	0.929774	-0.0316225	-0.0401258	0.804161	0.803225	-0.0951626	-0.0718786	0.631149	0.627856	-0.20214	-0.0134725	0.927467	0.927229	-0.0328128	13.278	14.9398	3.73444	2.6506	0.414938	0.421687	0	0.180723	0	0.120482	1.65975	4.56432	7.05394	2.46988	5.12048	7.3494	15.2672	12.8272	10.9091	16.7411	17.5439	14.8724	11.9565	15.0198	241	1660	0.926649	0.907472	KLy	GAIN.LOSS	CDS	min15k.min10pr
PhMm_Aggr_CardvascMuscle_all__ALL	-0.00975648	0.92894	0.928548	-0.0321955	-0.0424682	0.76	0.759238	-0.119622	-0.066709	0.585965	0.581883	-0.235164	-0.0115238	0.923486	0.92323	-0.03469	19.917	18.0723	3.73444	4.33735	1.24481	1.0241	0	0.481928	0	0.240964	4.14938	7.46888	8.29876	2.89157	6.98795	8.19277	22.1374	16.623	17.2727	19.308	21.0526	15.8713	19.5652	20.6851	241	1660	0.921932	0.907472	KLy	GAIN.LOSS	CDS	min15k.min10pr
BspanVHM_PreNat__ALL	-0.00799106	0.9339	0.933593	-0.0298426	-0.038814	0.757033	0.756352	-0.121276	-0.0530293	0.618334	0.614478	-0.211494	-0.00927635	0.928767	0.928549	-0.0321951	18.6722	19.0361	5.80913	5.18072	2.48963	1.68675	0.829876	0.843373	0	0.481928	1.65975	9.95851	7.05394	2.6506	8.37349	8.01205	22.1374	18.9791	14.5455	19.0848	21.0526	18.313	17.9348	19.8946	241	1660	0.921932	0.907472	KLy	GAIN.LOSS	CDS	min15k.min10pr
PhMm_Aggr_SkeCranioLimbs_all__ALL	-0.0219085	0.86972	0.867835	-0.0615628	-0.0485761	0.754178	0.748534	-0.125788	-0.0719786	0.631355	0.618877	-0.208396	-0.024991	0.860287	0.858302	-0.0663599	12.8631	14.6386	2.07469	2.22892	1.24481	0.481928	0.414938	0.240964	0	0.180723	2.07469	5.39419	5.39419	1.74699	6.0241	6.86747	16.7939	12.4346	8.18182	16.5179	19.2982	14.8724	10.8696	14.361	241	1660	0.921932	0.907472	KLy	GAIN.LOSS	CDS	min15k.min10pr
SynKEGG_Serotonergic__ALL	-0.403126	0.594113	0.575161	-0.240211	-0.440984	0.565414	0.54445	-0.264042	-0.541795	0.494224	0.465482	-0.332098	-0.405847	0.593886	0.575211	-0.240173	0.829876	1.26506	0	0	0	0	0	0	0	0	0.414938	0	0.414938	0.120482	0.481928	0.662651	0.763359	1.04712	0.909091	1.45089	0	1.33185	1.08696	1.18577	241	1660	0.778976	0.847841	KLy	GAIN.LOSS	CDS	min15k.min10pr
HI_q4__ALL	-0.0389341	0.655966	0.648811	-0.187882	-0.0915491	0.417429	0.413123	-0.383921	-0.0966778	0.332986	0.321042	-0.493438	-0.049098	0.611311	0.605347	-0.217996	22.4066	25.4217	7.46888	7.10843	3.3195	2.53012	1.65975	1.0241	0.829876	0.542169	4.97925	9.12863	8.29876	3.9759	11.1446	10.3012	23.6641	23.9529	20.9091	26.6741	21.0526	23.0855	22.8261	28.195	241	1660	0.702309	0.711876	KLy	GAIN.LOSS	CDS	min15k.min10pr
PhMm_Aggr_HematoImmune_all__ALL	-0.0629844	0.546657	0.53371	-0.272694	-0.128818	0.319827	0.313237	-0.504127	-0.118335	0.286974	0.27421	-0.561917	-0.0722823	0.512325	0.501878	-0.299402	19.917	20.241	3.73444	6.3253	2.07469	1.86747	0.414938	0.843373	0	0.361446	2.90456	6.22407	10.7884	2.59036	7.89157	9.75904	20.6107	16.7539	19.0909	23.2143	19.2982	19.6448	20.1087	20.9486	241	1660	0.570538	0.665937	KLy	GAIN.LOSS	CDS	min15k.min10pr
SynKEGG_Glutamatergic__ALL	-0.868306	0.398198	0.333226	-0.477262	-0.912192	0.371524	0.305584	-0.514869	-1.04454	0.301431	0.233692	-0.631357	-0.871467	0.396604	0.332474	-0.478242	0.414938	0.963855	0	0.060241	0	0	0	0	0	0	0	0	0.414938	0.180723	0.361446	0.421687	0	0.52356	0.909091	1.33929	0	0.776915	0.543478	1.18577	241	1660	0.570538	0.662126	KLy	GAIN.LOSS	CDS	min15k.min10pr
Neurof_PathwaysAxonG__ALL	-0.417277	0.347816	0.311563	-0.506455	-0.490887	0.281828	0.249693	-0.602594	-0.535238	0.23594	0.200284	-0.698353	-0.429019	0.338679	0.304469	-0.516458	2.07469	3.13253	0	0.542169	0	0.060241	0	0	0	0	1.24481	0.414938	0.414938	0.843373	1.20482	1.08434	2.29008	2.35602	1.81818	3.79464	1.75439	3.21865	2.17391	3.0303	241	1660	0.553667	0.662126	KLy	GAIN.LOSS	CDS	min15k.min10pr
HI_q3__ALL	-0.0497486	0.527903	0.508432	-0.293768	-0.132005	0.220763	0.212771	-0.672088	-0.108274	0.20167	0.188222	-0.72533	-0.0612263	0.475858	0.459977	-0.337264	28.6307	29.9398	8.71369	8.79518	3.3195	2.95181	1.65975	1.26506	0.414938	0.722892	4.56432	12.4481	11.6183	4.45783	12.8313	12.6506	32.0611	28.1414	24.5455	31.4732	22.807	26.7481	30.4348	33.7286	241	1660	0.542565	0.662126	KLy	GAIN.LOSS	CDS	min15k.min10pr
BspanML_lg2rpkm0.93__ALL	-0.0558682	0.398359	0.381626	-0.418362	-0.1385	0.127986	0.124212	-0.905838	-0.101274	0.154291	0.14544	-0.837315	-0.0696435	0.336074	0.323794	-0.489732	34.4398	38.3735	11.6183	14.6988	6.639	6.44578	2.48963	2.22892	1.65975	1.44578	6.22407	14.1079	14.1079	4.93976	15.7831	17.6506	35.1145	35.6021	33.6364	40.7366	28.0702	36.8479	36.413	40.1845	241	1660	0.422319	0.638825	KLy	GAIN.LOSS	CDS	min15k.min10pr
GI_q2__ALL	-0.0769611	0.379031	0.349935	-0.456012	-0.169208	0.13685	0.121137	-0.916723	-0.143229	0.116891	0.100949	-0.995897	-0.0950174	0.317856	0.294112	-0.531487	19.5021	26.988	7.05394	7.95181	3.3195	2.46988	2.48963	1.3253	1.24481	0.843373	5.39419	6.639	7.46888	3.6747	12.9518	10.3614	18.3206	27.2251	20.9091	26.7857	19.2982	25.8602	19.5652	28.3267	241	1660	0.422319	0.638825	KLy	GAIN.LOSS	CDS	min15k.min10pr
SynKEGG_Dopaminergic__ALL	-1.30922	0.193954	0.101938	-0.991665	-1.39051	0.169331	0.0836823	-1.07737	-1.46321	0.141496	0.0634563	-1.19753	-1.31821	0.19103	0.100109	-0.999525	0.414938	1.38554	0	0.120482	0	0	0	0	0	0	0	0	0.414938	0.120482	0.542169	0.722892	0.763359	1.04712	0	1.67411	1.75439	0.887902	0	1.97628	241	1660	0.387982	0.638825	KLy	GAIN.LOSS	CDS	min15k.min10pr
SynKEGG_Cholinergic__ALL	-14.5908	0.973442	0.00578588	-2.23763	-14.6308	0.973515	0.00494879	-2.3055	-14.5894	0.973227	0.00364546	-2.43825	-14.5966	0.973461	0.00572054	-2.24256	0	1.56627	0	0.060241	0	0	0	0	0	0	0	0	0	0.240964	0.843373	0.481928	0	1.17801	0	1.89732	0	1.22087	0	1.97628	241	1660	0.126194	0.160384	KLy	GAIN.LOSS	CDS	min15k.min10pr
FMR1_Targets_Darnell__ALL	0.520546	0.00652236	0.00971795	2.01243	0.643469	0.00204734	0.0031167	2.50631	0.553803	0.00528026	0.00767206	2.11509	0.594792	0.0029994	0.00459189	2.33801	12.3932	7.27049	2.13675	0.492914	0	0.0616143	0	0	0	0	1.7094	4.2735	6.41026	1.17067	3.38879	2.71103	14.0625	7.72304	10.3774	6.88073	10.9091	6.48464	12.8492	8.19892	234	1623	0.158951	0.207228	KLn	GAIN.LOSS	CDS	min15k.min10pr
BspanVHM_PstNat__ALL	0.104918	0.180924	0.212298	0.673054	0.261346	0.0304479	0.0332804	1.47781	0.153608	0.127783	0.137224	0.862571	0.171534	0.0741411	0.0887492	1.05184	22.6496	18.9772	6.41026	5.42206	1.7094	1.7252	1.7094	0.308071	1.28205	0.184843	3.4188	8.54701	10.6838	2.09489	7.70179	9.18053	25	19.3076	19.8113	18.6927	27.2727	17.2924	21.2291	20.9677	234	1623	0.346736	0.640359	KLn	GAIN.LOSS	CDS	min15k.min10pr
Neurof_UnionInclusive__ALL	0.101995	0.184189	0.221125	0.655362	0.256549	0.0345595	0.0385186	1.41433	0.171908	0.113659	0.121179	0.916574	0.183129	0.0631312	0.079564	1.09928	24.359	20.3943	6.83761	4.62107	1.28205	1.10906	0.42735	0.492914	0.42735	0.246457	3.4188	9.82906	11.1111	2.40296	8.626	9.36537	27.3438	19.3076	20.7547	21.3303	27.2727	19.6815	23.4637	21.2366	234	1623	0.346736	0.640359	KLn	GAIN.LOSS	CDS	min15k.min10pr
Kirov_ARC__ALL	1.76423	0.0290573	0.0418855	1.37794	1.77703	0.0281819	0.0407924	1.38942	1.76756	0.0287948	0.0416039	1.38087	1.84337	0.0229298	0.0348725	1.45752	1.28205	0.246457	0	0	0	0	0	0	0	0	0	0	1.28205	0.0616143	0.0616143	0.123229	0.78125	0.133156	1.88679	0.344037	0	0.341297	1.67598	0.134409	234	1623	0.346736	0.53045	KLn	GAIN.LOSS	CDS	min15k.min10pr
Neurof_GoNervSysDev__ALL	0.136059	0.201687	0.238028	0.623371	0.295925	0.056341	0.0633359	1.19835	0.214267	0.136767	0.14646	0.834282	0.232839	0.0806749	0.0989142	1.00474	15.812	13.3087	3.84615	2.40296	0.42735	0.677757	0	0.246457	0	0.184843	2.5641	6.83761	6.41026	1.7252	5.54529	6.0382	18.75	11.8509	12.2642	14.5642	21.8182	13.8794	13.9665	12.6344	234	1623	0.461448	0.640359	KLn	GAIN.LOSS	CDS	min15k.min10pr
FMR1_Targets_Ascano__ALL	0.245124	0.166752	0.184631	0.733694	0.356658	0.0756864	0.0859677	1.06566	0.275691	0.146141	0.15901	0.798574	0.308837	0.104006	0.116605	0.933281	10.6838	9.67344	2.13675	0.800986	0.854701	0.184843	0	0.0616143	0	0.0616143	1.28205	4.70085	4.70085	1.2939	4.313	4.06654	10.9375	9.32091	10.3774	9.97706	12.7273	9.89761	10.0559	9.4086	234	1623	0.548044	0.640359	KLn	GAIN.LOSS	CDS	min15k.min10pr
PhMm_NeuroUnion_all__ALL	0.070888	0.395202	0.419761	0.376998	0.177799	0.138277	0.142855	0.845103	0.104599	0.321739	0.328358	0.483653	0.128628	0.205954	0.221379	0.654864	24.359	23.0437	8.11966	6.28466	2.99145	1.60197	0.42735	0.246457	0	0.184843	2.5641	11.5385	10.2564	2.52619	9.4886	11.029	26.5625	20.2397	21.6981	25.4587	29.0909	22.0705	22.905	24.1935	234	1623	0.613156	0.849457	KLn	GAIN.LOSS	CDS	min15k.min10pr
Neurof_GoNeuronProj__ALL	0.122945	0.36655	0.401829	0.395959	0.253471	0.172461	0.186785	0.728659	0.180569	0.303627	0.315151	0.501482	0.204901	0.211237	0.238574	0.622377	11.9658	9.11892	0.854701	1.10906	0.42735	0.308071	0	0.246457	0	0.0616143	1.7094	4.70085	5.55556	1.04744	3.20394	4.86753	12.5	7.98935	11.3208	10.0917	10.9091	8.98749	12.2905	9.27419	234	1623	0.613156	0.849457	KLn	GAIN.LOSS	CDS	min15k.min10pr
Neurof_UnionStringent__ALL	0.109803	0.398443	0.433436	0.363075	0.240837	0.182714	0.197644	0.704116	0.169471	0.324632	0.33548	0.474333	0.198752	0.213843	0.241354	0.617345	11.1111	8.87246	1.7094	1.41713	0.42735	0.308071	0	0.246457	0	0.0616143	1.7094	4.70085	4.70085	1.17067	3.4504	4.25139	12.5	7.58988	9.43396	9.97706	10.9091	8.64619	11.1732	9.13978	234	1623	0.613156	0.849457	KLn	GAIN.LOSS	CDS	min15k.min10pr
PhMm_NervSystem_all__ALL	0.0694879	0.472605	0.496394	0.304173	0.18238	0.191785	0.19772	0.70395	0.10824	0.39031	0.396107	0.402188	0.138217	0.24902	0.266482	0.574332	19.2308	18.1146	6.41026	4.12816	0.854701	0.677757	0	0.246457	0	0.184843	2.13675	9.82906	7.26496	2.21811	7.57856	8.31793	21.875	16.3782	16.0377	19.6101	23.6364	17.5199	17.8771	18.8172	234	1623	0.613156	0.870291	KLn	GAIN.LOSS	CDS	min15k.min10pr
PhMm_CompleteLethality__ALL	0.270744	0.286882	0.305168	0.515461	0.357764	0.187166	0.204385	0.68955	0.298993	0.261845	0.278417	0.555305	0.337308	0.205317	0.222903	0.651884	6.83761	5.36044	0.42735	0.369686	0	0.123229	0	0	0	0	1.28205	1.7094	3.84615	0.924214	2.1565	2.27973	9.375	3.72836	3.77358	6.76606	14.5455	5.00569	4.46927	5.77957	234	1623	0.613156	0.849457	KLn	GAIN.LOSS	CDS	min15k.min10pr
HI_q2__ALL	0.0262937	0.71774	0.725033	0.139642	0.141187	0.234587	0.238931	0.621727	0.0424404	0.641903	0.644354	0.190876	0.0660843	0.451339	0.463218	0.334215	32.0513	30.4375	8.97436	9.24214	2.13675	2.71103	2.13675	0.800986	0.854701	0.369686	5.12821	11.1111	15.812	3.51201	12.1996	14.7258	33.5938	30.0932	30.1887	30.7339	32.7273	29.5791	31.8436	31.4516	234	1623	0.639071	0.870291	KLn	GAIN.LOSS	CDS	min15k.min10pr
Neurof_GoNervTransm__ALL	0.188763	0.364837	0.3855	0.413976	0.281336	0.237237	0.250616	0.600991	0.226326	0.330134	0.341565	0.466527	0.276882	0.23452	0.249936	0.602172	8.11966	5.73013	0.854701	0.616143	0	0.0616143	0	0.0616143	0	0.0616143	1.28205	2.5641	4.2735	0.924214	2.52619	2.27973	8.59375	5.05992	7.54717	6.30734	9.09091	4.66439	7.82123	6.98925	234	1623	0.639071	0.849457	KLn	GAIN.LOSS	CDS	min15k.min10pr
Neurof_GoSynaptic__ALL	0.229852	0.363525	0.380928	0.419157	0.310935	0.254762	0.270351	0.568072	0.259164	0.336204	0.349777	0.456209	0.292644	0.272947	0.289292	0.538663	5.98291	4.43623	0.854701	0.4313	0	0.0616143	0	0.0616143	0	0	1.28205	1.7094	2.99145	0.492914	1.7252	2.21811	7.03125	4.39414	4.71698	4.47248	5.45455	3.9818	6.14525	4.97312	234	1623	0.656566	0.849457	KLn	GAIN.LOSS	CDS	min15k.min10pr
PSD_BayesGrant_fullset__ALL	0.106235	0.499493	0.510755	0.291788	0.187785	0.301099	0.311015	0.507219	0.12228	0.46898	0.476765	0.321696	0.147754	0.381809	0.393038	0.405566	13.6752	11.3986	1.7094	1.47874	0.42735	0.308071	0	0.184843	0	0.123229	1.7094	4.70085	7.26496	1.17067	4.68269	5.54529	11.7188	10.9188	16.0377	11.8119	9.09091	10.5802	15.0838	12.3656	234	1623	0.660906	0.870291	KLn	GAIN.LOSS	CDS	min15k.min10pr
GI_q1__ALL	0.0149357	0.774351	0.777689	0.109194	0.0667328	0.35421	0.363347	0.439678	0.017175	0.751381	0.755268	0.121899	0.0269113	0.620658	0.629178	0.201226	36.3248	33.5798	10.2564	11.4603	3.4188	4.80591	2.13675	2.21811	1.7094	1.04744	3.84615	11.5385	20.9402	3.57363	12.8774	17.1288	39.0625	34.3542	33.0189	32.9128	27.2727	32.537	39.1061	34.8118	234	1623	0.697508	0.870291	KLn	GAIN.LOSS	CDS	min15k.min10pr
PhHs_NervSys_ADX__ALL	0.165843	0.478626	0.492153	0.3079	0.226911	0.360736	0.375657	0.425209	0.172741	0.467428	0.480682	0.318142	0.199926	0.403924	0.419598	0.377167	6.83761	5.6069	0.854701	0.308071	0	0.184843	0	0.123229	0	0	0.854701	3.84615	2.13675	0.554529	2.46457	2.5878	8.59375	4.5273	4.71698	6.5367	5.45455	5.11945	7.26257	6.1828	234	1623	0.697508	0.870291	KLn	GAIN.LOSS	CDS	min15k.min10pr
GI_q4__ALL	0.025379	0.733559	0.739371	0.131138	0.0911299	0.37437	0.378464	0.421975	0.0360716	0.680175	0.682564	0.165857	0.0592261	0.49488	0.504286	0.297323	30.7692	29.6365	9.40171	8.87246	3.4188	2.34134	1.28205	0.924214	0.42735	0.492914	2.99145	13.2479	14.5299	2.77264	12.4461	14.4177	32.8125	26.6312	28.3019	32.2248	32.7273	27.9863	30.1676	31.586	234	1623	0.697508	0.870291	KLn	GAIN.LOSS	CDS	min15k.min10pr
BspanVH_lg2rpkm4.74__ALL	0.0193743	0.797333	0.802975	0.0952979	0.100257	0.383124	0.387417	0.411821	0.0310676	0.739049	0.741099	0.130124	0.0542286	0.545127	0.558895	0.25267	21.7949	21.0105	6.83761	6.28466	2.5641	2.1565	0.854701	0.985829	0.42735	0.308071	2.5641	8.97436	10.2564	1.84843	10.228	8.93407	24.2188	21.7044	18.8679	20.4128	27.2727	20.9329	20.1117	21.1022	234	1623	0.697508	0.870291	KLn	GAIN.LOSS	CDS	min15k.min10pr
PhMm_NeuroBehav_all__ALL	0.0558506	0.640734	0.649381	0.187501	0.126215	0.389889	0.396622	0.401623	0.0715653	0.596665	0.60086	0.221227	0.0967774	0.469254	0.479178	0.319503	17.094	16.5126	4.2735	2.40296	0.854701	0.492914	0	0.246457	0	0.184843	2.13675	5.55556	9.40171	1.54036	6.40789	8.56439	18.75	14.2477	15.0943	18.4633	20	15.6997	16.2011	17.4731	234	1623	0.697508	0.870291	KLn	GAIN.LOSS	CDS	min15k.min10pr
PhHs_NervSys_All__ALL	0.0610846	0.649897	0.655143	0.183664	0.118426	0.434942	0.4426	0.353988	0.0681564	0.626891	0.63178	0.199434	0.0897557	0.525471	0.533063	0.273222	16.2393	15.1571	2.5641	2.5878	0.854701	0.4313	0.42735	0.246457	0	0.246457	0.854701	7.26496	8.11966	0.985829	6.83919	7.3321	18.75	14.3808	13.2075	15.8257	14.5455	14.7895	16.7598	15.5914	234	1623	0.750324	0.870291	KLn	GAIN.LOSS	CDS	min15k.min10pr
GOP_lessthan500g__ALL	-0.00951339	0.727555	0.717239	-0.144336	0.0720221	0.474971	0.470792	0.327171	-0.0141088	0.676541	0.673312	-0.171784	0.000175111	0.995774	0.995775	0.00183866	58.1197	62.6617	35.8974	37.4615	25.2137	21.9963	14.5299	13.74	8.11966	9.24214	8.11966	26.0684	23.9316	7.02403	27.0487	28.589	60.1562	62.5832	55.6604	62.7294	54.5455	59.4994	59.2179	66.3978	234	1623	0.750324	0.870291	KLn	GAIN.LOSS	CDS	min15k.min10pr
BspanLA_lg2rpkm.MIN__ALL	-0.000883429	0.982118	0.982096	-0.00784585	0.0405226	0.514129	0.516636	0.286815	0.000384491	0.993221	0.993224	0.00295284	0.0126701	0.77	0.773029	0.111804	33.3333	35.1818	15.3846	15.0955	7.26496	6.96242	3.84615	4.12816	3.4188	2.5878	3.4188	14.1026	15.812	4.313	13.8632	17.0055	32.0312	32.2237	34.9057	37.7294	29.0909	33.2196	34.6369	37.5	234	1623	0.774954	0.993224	KLn	GAIN.LOSS	CDS	min15k.min10pr
Neurof_GoNervSysDev_CNS__ALL	0.0819109	0.711674	0.716392	0.144849	0.141576	0.555246	0.562535	0.249851	0.0947233	0.685949	0.689998	0.161152	0.130886	0.576953	0.58442	0.233275	8.11966	7.27049	0.42735	0.739372	0	0.246457	0	0.123229	0	0.0616143	1.28205	2.5641	4.2735	1.04744	3.14233	3.08071	11.7188	6.65779	3.77358	7.79817	10.9091	7.39477	7.26257	7.12366	234	1623	0.812986	0.870291	KLn	GAIN.LOSS	CDS	min15k.min10pr
BspanHM_lg2rpkm3.21__ALL	0.00424712	0.952369	0.952634	0.0210738	0.05601	0.571221	0.573873	0.241185	0.00872652	0.916813	0.917043	0.0376101	0.0314368	0.70091	0.706087	0.151142	29.0598	30.3142	10.6838	9.42699	2.5641	2.71103	1.7094	1.23229	0.854701	0.369686	3.84615	12.8205	12.3932	3.69686	12.6309	13.9864	30.4688	29.9601	27.3585	30.6193	27.2727	27.5313	29.6089	33.6022	234	1623	0.812986	0.954474	KLn	GAIN.LOSS	CDS	min15k.min10pr
HI_q1__ALL	-0.00220096	0.970204	0.970141	-0.0131653	0.0417884	0.610327	0.614287	0.211629	-0.0011822	0.98483	0.984815	-0.00664551	0.0114684	0.853196	0.854564	0.0682555	28.6325	30.1294	8.54701	11.0906	3.4188	4.43623	2.13675	1.60197	1.7094	0.985829	4.2735	10.2564	14.1026	3.14233	12.138	14.849	30.4688	28.229	26.4151	31.7661	20	30.2617	31.2849	29.9731	234	1623	0.824437	0.993224	KLn	GAIN.LOSS	CDS	min15k.min10pr
Kirov_NMDAR__ALL	0.260281	0.725036	0.734283	0.134136	0.370713	0.636604	0.649691	0.187293	0.306583	0.698194	0.70669	0.150771	0.387501	0.62025	0.634735	0.197407	0.854701	0.616143	0	0.0616143	0	0	0	0	0	0	0	0	0.854701	0.123229	0.246457	0.246457	0	0.532623	1.88679	0.688073	0	0.568828	1.11732	0.672043	234	1623	0.849596	0.870291	KLn	GAIN.LOSS	CDS	min15k.min10pr
Neurof_GoNeuronBody__ALL	0.127977	0.778541	0.782555	0.106485	0.19027	0.682138	0.689802	0.161276	0.133341	0.771164	0.77538	0.110485	0.178729	0.698422	0.705582	0.151452	2.13675	1.91004	0	0.246457	0	0	0	0	0	0	0	0.854701	1.28205	0.308071	0.4313	1.17067	2.34375	2.13049	1.88679	1.72018	1.81818	2.38908	2.23464	1.34409	234	1623	0.879497	0.870291	KLn	GAIN.LOSS	CDS	min15k.min10pr
GI_q3__ALL	-0.0217979	0.795485	0.789598	-0.102594	0.0212771	0.855995	0.856383	0.0673321	-0.025542	0.785953	0.784373	-0.105477	0.00239018	0.979926	0.979954	0.00879442	27.3504	26.4941	8.54701	7.94824	1.7094	2.21811	0	0.924214	0	0.369686	3.84615	13.6752	9.82906	3.20394	11.7067	11.5835	30.4688	25.4328	23.5849	27.4083	30.9091	26.2799	26.257	26.7473	234	1623	0.949403	0.870291	KLn	GAIN.LOSS	CDS	min15k.min10pr
PhMm_Aggr_Sensory_all__ALL	-0.0415607	0.811601	0.80983	-0.0916061	-0.00198254	0.991724	0.991722	-0.0036101	-0.0419041	0.81688	0.815707	-0.0884657	-0.0133237	0.941557	0.941428	-0.0262128	11.1111	10.9673	1.7094	2.03327	0	0.246457	0	0.123229	0	0.0616143	1.28205	5.12821	4.70085	1.10906	3.75847	6.09982	14.0625	10.253	7.54717	11.5826	14.5455	10.4664	10.0559	11.5591	234	1623	0.991722	0.870291	KLn	GAIN.LOSS	CDS	min15k.min10pr
BspanVHM_EqlNat__ALL	-0.0407802	0.727063	0.717591	-0.144123	-0.00483712	0.97317	0.973149	-0.0118205	-0.0483328	0.707172	0.703569	-0.152693	-0.013691	0.915823	0.915342	-0.0384168	18.3761	19.162	3.4188	4.313	0.854701	1.10906	0.42735	0.308071	0.42735	0.123229	3.4188	6.41026	8.54701	2.46457	8.37954	8.31793	20.3125	17.8429	16.0377	20.2982	16.3636	18.0887	18.9944	20.4301	234	1623	0.991722	0.870291	KLn	GAIN.LOSS	CDS	min15k.min10pr
PhHs_MindFun_All__ALL	-0.0694146	0.80459	0.802819	-0.0953825	-0.0318276	0.912491	0.912171	-0.0399236	-0.0684152	0.809074	0.807445	-0.0928872	-0.0509578	0.857607	0.8567	-0.0671714	5.12821	5.97659	0.854701	0.4313	0	0	0	0	0	0	0.42735	1.7094	2.99145	0.492914	1.91004	3.57363	3.125	5.99201	7.54717	5.9633	3.63636	5.80205	5.58659	6.1828	234	1623	0.949403	0.870291	KLn	GAIN.LOSS	CDS	min15k.min10pr
Neurof_KeggSynaptic__ALL	-0.0916783	0.803141	0.800122	-0.0968436	-0.0473572	0.901899	0.901353	-0.0451052	-0.0916366	0.807877	0.805761	-0.0937939	-0.0589976	0.876431	0.875478	-0.0577547	3.4188	3.26556	0	0.184843	0	0.0616143	0	0.0616143	0	0	0	0.42735	2.99145	0.184843	1.35551	1.7252	2.34375	2.79627	4.71698	3.66972	3.63636	2.61661	3.35196	4.03226	234	1623	0.949403	0.870291	KLn	GAIN.LOSS	CDS	min15k.min10pr
PhHs_MindFun_ADX__ALL	-0.176569	0.817764	0.813997	-0.0893774	-0.101192	0.896506	0.895344	-0.0480102	-0.173749	0.822584	0.819098	-0.0866644	-0.12977	0.866405	0.864424	-0.0632733	0.854701	0.985829	0	0	0	0	0	0	0	0	0.42735	0.42735	0	0.246457	0.246457	0.492914	0	0.932091	1.88679	1.03211	0	0.910125	1.11732	1.07527	234	1623	0.949403	0.870291	KLn	GAIN.LOSS	CDS	min15k.min10pr
PhMm_Aggr_EndoExocrRepr_all__ALL	-0.0587792	0.662425	0.655731	-0.183274	-0.0245549	0.878302	0.877999	-0.0565058	-0.0672152	0.64585	0.642318	-0.19225	-0.0335048	0.816946	0.81576	-0.0884376	17.094	16.451	2.99145	3.38879	0.42735	0.739372	0	0.123229	0	0.123229	2.99145	5.98291	8.11966	2.1565	6.65434	7.64017	21.0938	14.7803	12.2642	17.8899	14.5455	14.562	17.8771	18.6828	234	1623	0.949403	0.870291	KLn	GAIN.LOSS	CDS	min15k.min10pr
PhMm_Aggr_CardvascMuscle_all__ALL	-0.0665725	0.623273	0.612587	-0.212833	-0.0394698	0.799167	0.798305	-0.0978312	-0.073471	0.605279	0.600727	-0.221323	-0.0433515	0.765435	0.76322	-0.11735	17.9487	17.3752	2.13675	3.63524	0.854701	0.616143	0	0.184843	0	0.123229	2.5641	6.83761	8.54701	2.1565	6.96242	8.25632	20.3125	16.1119	15.0943	18.4633	20	15.2446	17.3184	19.8925	234	1623	0.925308	0.870291	KLn	GAIN.LOSS	CDS	min15k.min10pr
PhMm_Aggr_IntegAdipPigm_all__ALL	-0.0739372	0.624789	0.617406	-0.209429	-0.0476707	0.772832	0.77136	-0.112743	-0.0791306	0.616175	0.611579	-0.213548	-0.0523855	0.741446	0.739047	-0.131328	15.3846	13.8016	0.854701	3.38879	0	0.492914	0	0.123229	0	0.0616143	2.99145	2.13675	10.2564	1.47874	5.11399	7.20887	17.1875	12.1172	13.2075	15.2523	21.8182	13.1968	13.4078	14.5161	234	1623	0.914869	0.870291	KLn	GAIN.LOSS	CDS	min15k.min10pr
PhMm_Aggr_SkeCranioLimbs_all__ALL	-0.0820618	0.615848	0.599705	-0.222062	-0.0539038	0.76115	0.755734	-0.121631	-0.0876451	0.608518	0.594	-0.226214	-0.0588514	0.728947	0.721189	-0.141951	11.9658	13.9248	1.28205	1.91004	0.854701	0.308071	0	0.123229	0	0.123229	1.7094	4.70085	5.55556	1.23229	5.79174	6.9008	15.625	11.984	7.54717	15.5963	18.1818	14.1069	10.0559	13.7097	234	1623	0.914869	0.870291	KLn	GAIN.LOSS	CDS	min15k.min10pr
PhMm_Aggr_DigestHepato_all__ALL	-0.0852597	0.596016	0.584658	-0.233098	-0.058591	0.740921	0.738983	-0.131365	-0.0904647	0.584411	0.578161	-0.237951	-0.0650904	0.699595	0.695747	-0.157549	11.9658	14.2329	2.99145	2.52619	0	0.308071	0	0.123229	0	0.0616143	0.42735	4.2735	7.26496	1.78681	5.11399	7.3321	14.0625	11.984	9.43396	16.1697	16.3636	13.9932	10.6145	14.5161	234	1623	0.914869	0.870291	KLn	GAIN.LOSS	CDS	min15k.min10pr
BspanVHM_PreNat__ALL	-0.0880879	0.477302	0.460457	-0.336811	-0.0722078	0.606662	0.603404	-0.219392	-0.0950968	0.455221	0.445755	-0.350904	-0.0740406	0.568037	0.560763	-0.25122	16.6667	18.053	3.84615	4.313	1.28205	1.17067	0.42735	0.4313	0	0.184843	0.854701	8.54701	7.26496	1.78681	8.1947	8.07147	20.3125	18.3755	12.2642	17.7752	18.1818	17.1786	16.2011	19.086	234	1623	0.824437	0.870291	KLn	GAIN.LOSS	CDS	min15k.min10pr
SynKEGG_GABAergic__ALL	-0.711963	0.497241	0.453925	-0.343016	-0.658702	0.532074	0.494791	-0.305578	-0.716506	0.497419	0.454812	-0.342168	-0.665076	0.527083	0.488705	-0.310954	0.42735	0.924214	0	0	0	0	0	0	0	0	0	0.42735	0	0.0616143	0.4313	0.4313	0.78125	0.798935	0	1.03211	0	1.02389	0.558659	0.806452	234	1623	0.764677	0.870291	KLn	GAIN.LOSS	CDS	min15k.min10pr
SynKEGG_Glutamatergic__ALL	-0.745605	0.468572	0.415772	-0.381145	-0.702339	0.501602	0.45856	-0.338604	-0.755794	0.463689	0.414324	-0.38266	-0.717327	0.491747	0.446365	-0.35031	0.42735	0.8626	0	0.0616143	0	0	0	0	0	0	0	0	0.42735	0.123229	0.369686	0.369686	0	0.532623	0.943396	1.14679	0	0.682594	0.558659	1.07527	234	1623	0.750324	0.870291	KLn	GAIN.LOSS	CDS	min15k.min10pr
SynKEGG_Serotonergic__ALL	-0.969294	0.351027	0.283252	-0.547827	-0.931393	0.371511	0.307501	-0.512154	-0.973947	0.350608	0.28344	-0.547539	-0.943701	0.36452	0.299103	-0.52418	0.42735	1.17067	0	0	0	0	0	0	0	0	0	0	0.42735	0.0616143	0.492914	0.616143	0	1.06525	0.943396	1.26147	0	1.25142	0.558659	1.07527	234	1623	0.660906	0.849457	KLn	GAIN.LOSS	CDS	min15k.min10pr
HI_q3__ALL	-0.11072	0.263898	0.234187	-0.630437	-0.125262	0.297583	0.289334	-0.5386	-0.125268	0.220919	0.201347	-0.696054	-0.103383	0.324697	0.308012	-0.511432	26.9231	28.8355	6.83761	8.00986	2.5641	2.27973	0.854701	0.739372	0	0.369686	3.4188	11.5385	11.9658	3.51201	12.6925	12.6309	30.4688	27.4301	22.6415	30.0459	21.8182	25.4835	28.4916	32.7957	234	1623	0.660906	0.73348	KLn	GAIN.LOSS	CDS	min15k.min10pr
HI_q4__ALL	-0.139833	0.21482	0.191977	-0.716752	-0.148437	0.247986	0.23941	-0.620858	-0.158959	0.177751	0.163229	-0.787203	-0.135527	0.259863	0.24494	-0.61094	20.0855	24.5841	5.55556	6.22304	1.7094	1.97166	0.854701	0.677757	0.42735	0.246457	2.99145	8.97436	8.11966	3.14233	11.0906	10.3512	21.875	23.1691	17.9245	25.8028	18.1818	22.1843	20.6704	27.4194	234	1623	0.639071	0.640359	KLn	GAIN.LOSS	CDS	min15k.min10pr
PhMm_Aggr_HematoImmune_all__ALL	-0.175195	0.187284	0.162938	-0.787978	-0.183068	0.214491	0.202506	-0.693563	-0.18649	0.16635	0.148203	-0.829142	-0.169676	0.21813	0.200822	-0.697188	18.3761	19.5317	2.13675	5.6069	0.42735	1.54036	0	0.616143	0	0.184843	2.13675	5.55556	10.6838	1.97166	7.70179	9.85829	18.75	16.1119	17.9245	22.4771	16.3636	18.7713	18.9944	20.4301	234	1623	0.613156	0.640359	KLn	GAIN.LOSS	CDS	min15k.min10pr
Neurof_PathwaysAxonG__ALL	-0.738296	0.204125	0.147397	-0.831511	-0.717039	0.222858	0.171602	-0.765477	-0.750714	0.196926	0.143753	-0.842382	-0.712144	0.224051	0.171026	-0.766937	1.28205	2.77264	0	0.4313	0	0.0616143	0	0	0	0	0.42735	0.42735	0.42735	0.554529	1.17067	1.04744	2.34375	1.99734	0	3.44037	1.81818	2.84414	1.11732	2.68817	234	1623	0.613156	0.640359	KLn	GAIN.LOSS	CDS	min15k.min10pr
SynKEGG_Dopaminergic__ALL	-1.18538	0.238465	0.14589	-0.835974	-1.1547	0.254099	0.166232	-0.779286	-1.1984	0.233127	0.143536	-0.84304	-1.15989	0.251202	0.162051	-0.790347	0.42735	1.2939	0	0.123229	0	0	0	0	0	0	0	0	0.42735	0.0616143	0.554529	0.677757	0.78125	1.06525	0	1.49083	1.81818	0.910125	0	1.74731	234	1623	0.613156	0.640359	KLn	GAIN.LOSS	CDS	min15k.min10pr
BspanML_lg2rpkm0.93__ALL	-0.12359	0.12474	0.105388	-0.977211	-0.158004	0.110876	0.104819	-0.979559	-0.135638	0.100103	0.0875493	-1.05775	-0.123529	0.149128	0.135231	-0.868925	33.3333	37.0918	9.82906	13.3087	4.70085	5.54529	1.28205	1.84843	0.42735	1.10906	4.70085	14.1026	14.5299	3.94331	15.4036	17.7449	34.375	34.6205	32.0755	39.2202	27.2727	35.3811	35.1955	39.1129	234	1623	0.593975	0.640359	KLn	GAIN.LOSS	CDS	min15k.min10pr
GI_q2__ALL	-0.208667	0.0596193	0.0402095	-1.39567	-0.273897	0.0395384	0.0306943	-1.51294	-0.230954	0.0435522	0.0288331	-1.54011	-0.213781	0.0674895	0.0511829	-1.29087	17.5214	25.8164	5.12821	7.3321	2.13675	2.21811	1.28205	1.17067	0.854701	0.739372	3.84615	5.98291	7.69231	2.77264	12.6925	10.3512	16.4062	26.2317	18.8679	25.4587	16.3636	24.1183	17.8771	27.8226	234	1623	0.346736	0.490162	KLn	GAIN.LOSS	CDS	min15k.min10pr
SynKEGG_Cholinergic__ALL	-14.6177	0.9749	0.00829782	-2.08104	-14.59	0.97483	0.00954909	-2.02004	-14.6281	0.974965	0.00812658	-2.09009	-14.5877	0.974761	0.00926104	-2.03334	0	1.41713	0	0.0616143	0	0	0	0	0	0	0	0	0	0.123229	0.8626	0.4313	0	1.1984	0	1.6055	0	1.02389	0	1.88172	234	1623	0.243502	0.207228	KLn	GAIN.LOSS	CDS	min15k.min10pr
PhMm_Aggr_EndoExocrRepr_all__LOSS	0.23216	0.131935	0.16738	0.776298	0.889685	0.00264287	0.00428224	2.36833	0.695208	0.00870975	0.0128501	1.89109	0.66561	0.00773325	0.0141665	1.84874	6.25	3.55297	1.33929	0.387597	0.446429	0.0645995	0	0.0645995	0	0.0645995	0.446429	2.23214	3.57143	0.258398	1.29199	2.00258	6.55738	3.48189	5.88235	3.61446	7.54717	3.47722	5.84795	3.64146	224	1548	0.218394	0.655354	KLy	LOSS	CDS	min25k.min10pr
PhMm_NeuroUnion_all__LOSS	0.0828357	0.484697	0.526212	0.27884	0.417616	0.0889046	0.0953564	1.02065	0.302123	0.15186	0.166847	0.777681	0.307269	0.141738	0.164845	0.782925	10.2679	6.97674	0.892857	0.904393	0	0.129199	0	0.129199	0	0.0645995	0.446429	3.57143	6.25	0.581395	2.58398	3.81137	12.2951	6.54596	7.84314	7.3494	15.0943	6.35492	8.77193	7.70308	224	1548	0.934287	0.982237	KLy	LOSS	CDS	min25k.min10pr
FMR1_Targets_Darnell__LOSS	0.473781	0.202264	0.249466	0.602989	0.841242	0.0740053	0.0970008	1.01322	0.584407	0.125154	0.170115	0.769256	0.674772	0.0814101	0.12533	0.901944	2.67857	1.22739	0	0.193798	0	0.0645995	0	0.0645995	0	0	0	0.892857	1.78571	0.322997	0.581395	0.322997	3.27869	1.25348	1.96078	1.20482	3.77358	1.19904	2.33918	1.2605	224	1548	0.934287	0.982237	KLy	LOSS	CDS	min25k.min10pr
Neurof_GoNeuronProj__LOSS	0.130298	0.54719	0.588017	0.23061	0.746353	0.102046	0.119465	0.92276	0.557254	0.15088	0.184279	0.734524	0.54749	0.148831	0.198298	0.702681	3.125	1.87339	0	0.258398	0	0.129199	0	0.0645995	0	0.0645995	0.446429	1.33929	1.33929	0.258398	0.452196	1.16279	2.45902	1.39276	3.92157	2.28916	5.66038	2.03837	2.33918	1.68067	224	1548	0.934287	0.982237	KLy	LOSS	CDS	min25k.min10pr
Neurof_GoNervTransm__LOSS	0.257959	0.381612	0.42519	0.371417	0.69545	0.118195	0.139768	0.854591	0.613352	0.150145	0.174339	0.758606	0.620584	0.146545	0.170828	0.76744	2.67857	1.55039	0.446429	0.129199	0	0.0645995	0	0.0645995	0	0.0645995	0.446429	1.33929	0.892857	0.193798	0.775194	0.581395	3.27869	1.67131	1.96078	1.44578	3.77358	1.31894	2.33918	1.82073	224	1548	0.934287	0.982237	KLy	LOSS	CDS	min25k.min10pr
Neurof_UnionInclusive__LOSS	0.0519436	0.692707	0.715276	0.145526	0.369691	0.186293	0.196404	0.70685	0.258969	0.270176	0.293996	0.531658	0.268087	0.25889	0.292957	0.533196	7.58929	5.62016	0.446429	0.581395	0	0.258398	0	0.129199	0	0.129199	0.446429	3.125	4.01786	0.387597	1.93798	3.29457	7.37705	5.71031	7.84314	5.54217	9.43396	5.51559	7.01754	5.7423	224	1548	0.934287	0.982237	KLy	LOSS	CDS	min25k.min10pr
PhMm_NeuroBehav_all__LOSS	0.0970604	0.569108	0.599464	0.222237	0.378083	0.197817	0.210186	0.677396	0.305778	0.257118	0.273854	0.562481	0.300146	0.272743	0.289893	0.537763	7.14286	4.65116	0	0.387597	0	0.129199	0	0.0645995	0	0.0645995	0.446429	2.23214	4.46429	0.516796	1.55039	2.58398	8.19672	4.17827	5.88235	5.06024	7.54717	4.31655	7.01754	5.04202	224	1548	0.934287	0.982237	KLy	LOSS	CDS	min25k.min10pr
PhMm_Aggr_IntegAdipPigm_all__LOSS	0.126729	0.515791	0.54984	0.259763	0.386085	0.214861	0.229114	0.639949	0.331992	0.257827	0.276983	0.557547	0.307953	0.303241	0.320373	0.494344	5.80357	3.61757	0	0.387597	0	0.0645995	0	0.0645995	0	0.0645995	0	0.892857	4.91071	0.258398	1.16279	2.19638	8.19672	3.06407	2.94118	4.09639	9.43396	3.35731	4.67836	3.92157	224	1548	0.934287	0.982237	KLy	LOSS	CDS	min25k.min10pr
PhMm_NervSystem_all__LOSS	0.0472378	0.75476	0.769273	0.113919	0.312504	0.275818	0.2863	0.543179	0.23627	0.35762	0.372712	0.428626	0.253879	0.325686	0.344935	0.462263	6.69643	5.16796	0.892857	0.581395	0	0.129199	0	0.0645995	0	0.0645995	0.446429	2.67857	3.57143	0.452196	2.32558	2.39018	7.37705	5.1532	5.88235	5.18072	7.54717	4.43645	6.43275	6.02241	224	1548	0.934287	0.982237	KLy	LOSS	CDS	min25k.min10pr
PhMm_CompleteLethality__LOSS	0.375733	0.456238	0.479492	0.319218	0.551932	0.314117	0.339912	0.468633	0.473854	0.366785	0.393389	0.405178	0.441346	0.409175	0.431712	0.364806	1.78571	1.03359	0	0.193798	0	0	0	0	0	0	0	0	1.78571	0.129199	0.258398	0.645995	2.45902	0.417827	0.980392	1.56627	5.66038	0.719424	0.584795	1.40056	224	1548	0.934287	0.982237	KLy	LOSS	CDS	min25k.min10pr
Neurof_GoNervSysDev__LOSS	0.0585082	0.776287	0.789027	0.102908	0.35442	0.33355	0.348747	0.457489	0.29785	0.382074	0.40171	0.396087	0.26086	0.458952	0.475227	0.323099	4.46429	3.55297	0	0.258398	0	0.129199	0	0.0645995	0	0.0645995	0.446429	1.78571	2.23214	0.322997	1.03359	2.19638	4.09836	3.20334	4.90196	3.85542	1.88679	3.95683	5.26316	3.08123	224	1548	0.934287	0.982237	KLy	LOSS	CDS	min25k.min10pr
PhHs_NervSys_All__LOSS	0.128571	0.630174	0.639083	0.194443	0.297632	0.355469	0.366741	0.435641	0.234196	0.435054	0.445572	0.351082	0.204945	0.496988	0.505631	0.296166	5.80357	4.84496	0.446429	0.322997	0	0.0645995	0	0.0645995	0	0.0645995	0.446429	0.892857	4.46429	0.322997	2.06718	2.45478	6.55738	4.45682	4.90196	5.18072	5.66038	4.55635	5.84795	5.18207	224	1548	0.934287	0.982237	KLy	LOSS	CDS	min25k.min10pr
HI_q3__LOSS	0.00365045	0.973966	0.97418	0.0113608	0.207142	0.367174	0.371085	0.430527	0.107045	0.534036	0.547322	0.261757	0.113511	0.51795	0.532176	0.273945	9.82143	9.56072	2.23214	1.48579	0.446429	0.193798	0.446429	0.129199	0.446429	0.129199	0.446429	3.57143	5.80357	0.968992	3.29457	5.29716	10.6557	9.33148	8.82353	9.75904	5.66038	8.15348	11.1111	11.2045	224	1548	0.934287	0.982237	KLy	LOSS	CDS	min25k.min10pr
Neurof_UnionStringent__LOSS	0.0472506	0.847756	0.855028	0.0680197	0.420871	0.355218	0.375369	0.425542	0.317669	0.434487	0.461187	0.336123	0.290664	0.494733	0.516827	0.286655	2.67857	2.00258	0	0.322997	0	0.129199	0	0.0645995	0	0.0645995	0.446429	1.33929	0.892857	0.258398	0.516796	1.22739	2.45902	1.53203	2.94118	2.40964	3.77358	2.15827	2.33918	1.82073	224	1548	0.934287	0.982237	KLy	LOSS	CDS	min25k.min10pr
BspanVHM_PstNat__LOSS	0.00735036	0.96231	0.962745	0.0164888	0.202772	0.451588	0.464633	0.33289	0.104624	0.623262	0.639865	0.193912	0.11359	0.617186	0.63301	0.198589	6.25	5.42636	0.892857	0.904393	0	0.258398	0	0.129199	0	0.129199	0.446429	2.23214	3.57143	0.387597	1.87339	3.16537	5.7377	5.84958	6.86275	5.06024	9.43396	5.15588	5.26316	5.7423	224	1548	0.934287	0.982237	KLy	LOSS	CDS	min25k.min10pr
GI_q1__LOSS	0.00320187	0.976384	0.976434	0.010357	0.122654	0.47023	0.471962	0.326093	0.041413	0.729783	0.73391	0.134357	0.0357824	0.760739	0.764213	0.116785	13.8393	12.3385	1.33929	2.64858	0.446429	0.839793	0.446429	0.645995	0.446429	0.258398	1.33929	1.78571	10.7143	1.03359	3.61757	7.68734	16.3934	13.2312	10.7843	11.5663	5.66038	11.7506	16.3743	13.0252	224	1548	0.934287	0.982237	KLy	LOSS	CDS	min25k.min10pr
PSD_BayesGrant_fullset__LOSS	0.0677978	0.812596	0.8183	0.0870873	0.281826	0.465087	0.479629	0.319094	0.192463	0.576375	0.591099	0.22834	0.184921	0.602736	0.615007	0.21112	3.57143	2.51938	0	0.322997	0	0.258398	0	0.129199	0	0.0645995	0	0.892857	2.67857	0.193798	0.839793	1.48579	1.63934	2.08914	5.88235	2.89157	3.77358	2.15827	3.50877	2.94118	224	1548	0.934287	0.982237	KLy	LOSS	CDS	min25k.min10pr
PhMm_Aggr_HematoImmune_all__LOSS	0.0110859	0.950737	0.951497	0.0215926	0.207599	0.495271	0.503769	0.297769	0.14709	0.596409	0.604935	0.218292	0.149354	0.598099	0.605841	0.217641	5.35714	4.78036	0.892857	0.387597	0	0.129199	0	0.0645995	0	0.0645995	0	0.446429	4.91071	0.322997	1.87339	2.58398	5.7377	4.31755	4.90196	5.18072	3.77358	4.19664	5.84795	5.46218	224	1548	0.934287	0.982237	KLy	LOSS	CDS	min25k.min10pr
Neurof_KeggSynaptic__LOSS	0.110606	0.853509	0.858613	0.0662027	0.458549	0.56856	0.585509	0.232467	0.430075	0.588905	0.60551	0.217879	0.427047	0.599547	0.614109	0.211755	0.892857	0.775194	0	0.0645995	0	0.0645995	0	0.0645995	0	0	0	0	0.892857	0.193798	0.129199	0.452196	0	0.835655	1.96078	0.722892	0	1.07914	1.16959	0.420168	224	1548	0.934287	0.982237	KLy	LOSS	CDS	min25k.min10pr
GOP_lessthan500g__LOSS	-0.0236343	0.697472	0.649193	-0.187626	0.114759	0.589921	0.58661	0.231651	-0.000117206	0.998774	0.998774	-0.000532813	-0.000466598	0.995219	0.995217	-0.00208212	25.8929	25.323	7.14286	8.91473	3.57143	3.29457	1.33929	1.67959	0.446429	1.29199	1.33929	7.58929	16.9643	1.35659	8.65633	15.3101	27.0492	27.2981	24.5098	23.6145	26.4151	23.0216	25.731	28.0112	224	1548	0.934287	0.998774	KLy	LOSS	CDS	min25k.min10pr
PhHs_MindFun_All__LOSS	0.110603	0.802455	0.805048	0.0941782	0.225253	0.629791	0.63739	0.195595	0.183973	0.685373	0.691267	0.160354	0.137077	0.764359	0.767657	0.114833	2.67857	2.26098	0	0.129199	0	0	0	0	0	0	0.446429	0.446429	1.78571	0.129199	0.581395	1.55039	1.63934	1.67131	3.92157	2.77108	0	2.15827	3.50877	2.38095	224	1548	0.934287	0.982237	KLy	LOSS	CDS	min25k.min10pr
SynKEGG_Serotonergic__LOSS	0.259575	0.812103	0.81759	0.0874646	0.438172	0.695236	0.708422	0.149708	0.375216	0.734651	0.745046	0.127817	0.417873	0.707947	0.720182	0.142558	0.446429	0.516796	0	0	0	0	0	0	0	0	0	0	0.446429	0.129199	0.0645995	0.322997	0	0.557103	0.980392	0.481928	0	0.839329	0.584795	0.140056	224	1548	0.934287	0.982237	KLy	LOSS	CDS	min25k.min10pr
Neurof_GoSynaptic__LOSS	0.0244105	0.96171	0.961984	0.016832	0.23484	0.702499	0.710747	0.148285	0.156407	0.78529	0.791235	0.101695	0.163346	0.785903	0.791295	0.101662	1.33929	1.09819	0	0.258398	0	0.129199	0	0.0645995	0	0	0	0.892857	0.446429	0.193798	0.193798	0.710594	0.819672	1.11421	1.96078	1.08434	1.88679	1.07914	1.16959	1.12045	224	1548	0.934287	0.982237	KLy	LOSS	CDS	min25k.min10pr
FMR1_Targets_Ascano__LOSS	-0.00737096	0.98636	0.986332	-0.00597708	0.185716	0.725296	0.729554	0.136943	0.139437	0.782712	0.785646	0.104773	0.181592	0.719922	0.724724	0.139827	2.23214	2.19638	0	0.0645995	0	0.0645995	0	0.0645995	0	0.0645995	0	0	2.23214	0.387597	0.775194	1.03359	1.63934	2.36769	2.94118	2.04819	1.88679	2.39808	2.33918	1.96078	224	1548	0.934287	0.982237	KLy	LOSS	CDS	min25k.min10pr
Neurof_GoNeuronBody__LOSS	0.123696	0.910767	0.91197	0.0400196	0.333194	0.771526	0.778338	0.108832	0.237815	0.832079	0.836095	0.0777444	0.211366	0.851087	0.854187	0.068447	0.446429	0.452196	0	0	0	0	0	0	0	0	0	0	0.446429	0.129199	0.0645995	0.258398	0	0.557103	0.980392	0.361446	0	0.59952	0.584795	0.280112	224	1548	0.934287	0.982237	KLy	LOSS	CDS	min25k.min10pr
BspanLA_lg2rpkm.MIN__LOSS	-0.0280382	0.777706	0.771522	-0.112652	0.0377146	0.799695	0.800412	0.0966863	0.0090196	0.937208	0.937448	0.0280529	-0.00349596	0.975201	0.975164	-0.0109222	15.625	11.8863	2.23214	3.81137	1.33929	1.35659	0.446429	0.904393	0	0.645995	0.892857	3.57143	11.1607	0.968992	4.19897	6.71835	14.7541	11.9777	16.6667	11.8072	13.2075	11.0312	16.3743	12.8852	224	1548	0.934287	0.982237	KLy	LOSS	CDS	min25k.min10pr
BspanVH_lg2rpkm4.74__LOSS	-0.0390224	0.805805	0.783954	-0.105709	0.0574771	0.798078	0.806052	0.093637	0.00899172	0.961641	0.962108	0.0167763	0.0192342	0.924173	0.92585	0.0334596	5.80357	5.29716	0.446429	0.710594	0	0.258398	0	0.258398	0	0.193798	0.446429	2.67857	2.67857	0.581395	2.06718	2.64858	4.91803	6.12813	6.86275	4.57831	9.43396	5.51559	4.67836	5.04202	224	1548	0.934287	0.982237	KLy	LOSS	CDS	min25k.min10pr
BspanHM_lg2rpkm3.21__LOSS	-0.040234	0.786889	0.768946	-0.114104	0.0469404	0.832806	0.833588	0.0790483	0.0185795	0.923489	0.923767	0.0344373	0.0382174	0.845254	0.84632	0.0724653	8.48214	8.78553	2.23214	1.55039	0.446429	0.452196	0	0.129199	0	0.0645995	0	3.57143	4.91071	0.839793	2.97158	4.97416	8.19672	9.1922	8.82353	8.43373	9.43396	7.67386	8.18713	10.084	224	1548	0.944734	0.982237	KLy	LOSS	CDS	min25k.min10pr
HI_q2__LOSS	-0.0606754	0.711047	0.685335	-0.164097	0.0407035	0.878816	0.879065	0.055979	-0.0090818	0.963057	0.962977	-0.016384	-0.00566139	0.977405	0.977381	-0.00993597	9.82143	9.36693	0.892857	1.42119	0.446429	0.258398	0.446429	0.129199	0	0.129199	0.446429	2.67857	6.69643	0.710594	3.55297	5.10336	10.6557	11.0028	8.82353	7.95181	9.43396	8.03357	9.94152	10.9244	224	1548	0.953879	0.982237	KLy	LOSS	CDS	min25k.min10pr
BspanVHM_PreNat__LOSS	-0.0942421	0.69493	0.669276	-0.174395	-0.0132033	0.966038	0.965992	-0.0150266	-0.0400781	0.88368	0.882444	-0.054313	0.00383425	0.989021	0.989033	0.00478918	4.91071	4.58656	0.446429	0.710594	0	0.193798	0	0.193798	0	0.129199	0	2.67857	2.23214	0.452196	1.55039	2.58398	4.09836	5.01393	5.88235	4.21687	5.66038	4.07674	4.67836	5.18207	224	1548	0.965992	0.982237	KLy	LOSS	CDS	min25k.min10pr
SynKEGG_GABAergic__LOSS	-9.97921	0.975485	0.703368	-0.152818	-6.90689	0.983035	0.935634	-0.0288941	-5.80994	0.985729	0.962073	-0.016792	-3.22175	0.992085	0.989663	-0.00451246	0	0.0645995	0	0	0	0	0	0	0	0	0	0	0	0.0645995	0	0	0	0.139276	0	0	0	0.119904	0	0	224	1548	0.954346	0.982237	KLy	LOSS	CDS	min25k.min10pr
PhMm_Aggr_Sensory_all__LOSS	-0.127888	0.708656	0.697141	-0.15668	-0.0387791	0.921873	0.921567	-0.0354732	-0.0718147	0.846872	0.84549	-0.0728918	-0.0840688	0.822257	0.820421	-0.085963	3.57143	3.55297	0	0.258398	0	0.0645995	0	0.0645995	0	0.0645995	0.446429	0.446429	2.67857	0.193798	1.42119	1.93798	4.91803	3.62117	1.96078	3.49398	3.77358	3.35731	3.50877	3.78151	224	1548	0.954346	0.982237	KLy	LOSS	CDS	min25k.min10pr
PhHs_NervSys_ADX__LOSS	-0.205993	0.771643	0.76428	-0.116748	-0.0833683	0.909588	0.908557	-0.041648	-0.11862	0.867932	0.865537	-0.0627143	-0.16078	0.823732	0.819542	-0.0864289	0.892857	0.968992	0	0.129199	0	0	0	0	0	0	0.446429	0	0.446429	0.193798	0.387597	0.387597	0.819672	0.557103	0.980392	1.3253	0	0.839329	1.16959	1.12045	224	1548	0.954346	0.982237	KLy	LOSS	CDS	min25k.min10pr
BspanVHM_EqlNat__LOSS	-0.123354	0.66164	0.607174	-0.216687	-0.055789	0.871803	0.870831	-0.0600661	-0.0687692	0.828687	0.826555	-0.0827284	-0.057013	0.860231	0.859139	-0.0659367	4.91071	4.97416	0	0.452196	0	0.193798	0	0.129199	0	0.0645995	0	1.33929	3.57143	0.581395	1.87339	2.51938	5.7377	4.5961	3.92157	5.3012	3.77358	4.55635	5.26316	5.46218	224	1548	0.953879	0.982237	KLy	LOSS	CDS	min25k.min10pr
PhMm_Aggr_DigestHepato_all__LOSS	-0.156964	0.63923	0.604519	-0.21859	-0.100567	0.790173	0.787449	-0.103778	-0.122531	0.738734	0.733846	-0.134395	-0.113348	0.75927	0.755387	-0.12183	3.57143	3.87597	0	0.193798	0	0.129199	0	0.0645995	0	0.0645995	0	0.446429	3.125	0.387597	1.03359	2.45478	3.27869	3.76045	3.92157	3.9759	7.54717	3.47722	2.33918	4.34174	224	1548	0.934287	0.982237	KLy	LOSS	CDS	min25k.min10pr
HI_q1__LOSS	-0.0917142	0.544143	0.522054	-0.282285	-0.0584145	0.773824	0.772824	-0.11192	-0.0649944	0.686645	0.680693	-0.167049	-0.0650327	0.683025	0.676826	-0.169523	9.375	10.0775	1.33929	2.97158	0.446429	0.904393	0.446429	0.387597	0.446429	0.129199	0.892857	2.23214	6.25	0.581395	3.16537	6.33075	9.83607	9.7493	8.82353	10.3614	7.54717	10.6715	9.94152	9.38375	224	1548	0.934287	0.982237	KLy	LOSS	CDS	min25k.min10pr
Kirov_ARC__LOSS	-9.63387	0.976333	0.747383	-0.126457	-9.59087	0.976439	0.752467	-0.123512	-9.63415	0.976333	0.74735	-0.126476	-9.69237	0.97619	0.740356	-0.130559	0	0.0645995	0	0	0	0	0	0	0	0	0	0	0	0	0	0.0645995	0	0	0	0.120482	0	0.119904	0	0	224	1548	0.934287	0.982237	KLy	LOSS	CDS	min25k.min10pr
Neurof_GoNervSysDev_CNS__LOSS	-0.247889	0.636963	0.624173	-0.204695	-0.1769	0.748218	0.743495	-0.128722	-0.185501	0.733518	0.728005	-0.137865	-0.23281	0.671178	0.663004	-0.178484	1.78571	2.39018	0	0.0645995	0	0.0645995	0	0	0	0	0	0.446429	1.33929	0.193798	0.775194	1.42119	2.45902	2.50696	0.980392	2.28916	1.88679	2.63789	1.75439	2.10084	224	1548	0.934287	0.982237	KLy	LOSS	CDS	min25k.min10pr
GI_q4__LOSS	-0.116495	0.5668	0.523598	-0.281002	-0.0793679	0.744046	0.742136	-0.129516	-0.0860708	0.694535	0.689855	-0.161242	-0.0808381	0.716059	0.71233	-0.147319	8.03571	9.10853	1.33929	1.55039	0	0.193798	0	0.193798	0	0.193798	0.446429	2.67857	4.91071	0.645995	3.74677	4.71576	8.19672	9.05292	7.84314	9.15663	9.43396	8.753	7.60234	9.52381	224	1548	0.934287	0.982237	KLy	LOSS	CDS	min25k.min10pr
SynKEGG_Dopaminergic__LOSS	-10.9477	0.978317	0.530104	-0.275639	-10.8147	0.977268	0.615419	-0.210829	-10.7491	0.976897	0.62191	-0.206273	-10.3991	0.975761	0.654003	-0.18442	0	0.193798	0	0.0645995	0	0	0	0	0	0	0	0	0	0.0645995	0.0645995	0.0645995	0	0.278552	0	0.120482	0	0.359712	0	0	224	1548	0.934287	0.982237	KLy	LOSS	CDS	min25k.min10pr
PhMm_Aggr_SkeCranioLimbs_all__LOSS	-0.292491	0.483039	0.453005	-0.343897	-0.240806	0.590821	0.580948	-0.235863	-0.239164	0.583301	0.571679	-0.242847	-0.280478	0.52324	0.508542	-0.293673	2.67857	3.81137	0	0.193798	0	0.0645995	0	0.0645995	0	0.0645995	0	0.446429	2.23214	0.193798	1.29199	2.32558	4.09836	3.34262	0.980392	4.21687	3.77358	4.19664	2.33918	3.36134	224	1548	0.934287	0.982237	KLy	LOSS	CDS	min25k.min10pr
SynKEGG_Glutamatergic__LOSS	-11.1051	0.975809	0.480253	-0.31853	-10.8581	0.975336	0.58054	-0.236168	-10.9175	0.974596	0.561663	-0.250524	-10.5125	0.973842	0.612406	-0.212961	0	0.258398	0	0.0645995	0	0	0	0	0	0	0	0	0	0.129199	0.0645995	0.0645995	0	0.278552	0	0.240964	0	0.479616	0	0	224	1548	0.934287	0.982237	KLy	LOSS	CDS	min25k.min10pr
GI_q3__LOSS	-0.199454	0.406312	0.341399	-0.466738	-0.191086	0.484143	0.470269	-0.327654	-0.17875	0.463445	0.440356	-0.356196	-0.158638	0.521869	0.505709	-0.296099	5.35714	7.29974	1.33929	1.35659	0	0.322997	0	0.129199	0	0.129199	0	2.23214	3.125	0.581395	2.51938	4.19897	6.55738	7.38162	3.92157	7.22892	11.3208	7.19424	3.50877	7.42297	224	1548	0.934287	0.982237	KLy	LOSS	CDS	min25k.min10pr
BspanML_lg2rpkm0.93__LOSS	-0.136672	0.38423	0.33859	-0.470326	-0.139632	0.470962	0.467262	-0.33044	-0.117471	0.478355	0.465971	-0.331641	-0.106407	0.519364	0.507075	-0.294928	8.92857	13.2429	1.78571	2.90698	0.892857	0.516796	0.892857	0.129199	0.446429	0.0645995	0.892857	1.78571	6.25	0.904393	4.65116	7.68734	11.4754	13.649	5.88235	12.8916	3.77358	12.5899	10.5263	14.0056	224	1548	0.934287	0.982237	KLy	LOSS	CDS	min25k.min10pr
Kirov_NMDAR__LOSS	-11.6521	0.971965	0.352025	-0.453426	-12.4602	0.980796	0.414053	-0.382944	-12.4912	0.980422	0.399664	-0.398305	-12.253	0.979284	0.421859	-0.374833	0	0.322997	0	0.0645995	0	0	0	0	0	0	0	0	0	0.129199	0.0645995	0.129199	0	0.278552	0	0.361446	0	0.479616	0	0.140056	224	1548	0.934287	0.982237	KLy	LOSS	CDS	min25k.min10pr
SynKEGG_Cholinergic__LOSS	-12.7914	0.979723	0.293331	-0.532641	-12.6039	0.979211	0.353861	-0.451167	-12.606	0.978831	0.344006	-0.463434	-12.3261	0.977595	0.375953	-0.424866	0	0.387597	0	0.0645995	0	0	0	0	0	0	0	0	0	0.193798	0.129199	0.0645995	0	0.417827	0	0.361446	0	0.59952	0	0.140056	224	1548	0.934287	0.982237	KLy	LOSS	CDS	min25k.min10pr
PhHs_MindFun_ADX__LOSS	-12.7746	0.976615	0.263452	-0.579298	-12.5247	0.975749	0.298117	-0.525613	-12.4998	0.975268	0.293697	-0.5321	-12.3958	0.97366	0.285287	-0.544718	0	0.258398	0	0	0	0	0	0	0	0	0	0	0	0.0645995	0.0645995	0.129199	0	0.139276	0	0.361446	0	0.119904	0	0.420168	224	1548	0.934287	0.982237	KLy	LOSS	CDS	min25k.min10pr
GI_q2__LOSS	-0.272299	0.263622	0.219212	-0.659136	-0.308363	0.291305	0.279136	-0.554185	-0.25133	0.315405	0.298199	-0.525494	-0.248911	0.326713	0.310108	-0.508488	5.35714	8.59173	1.78571	1.09819	0.446429	0.129199	0	0.129199	0	0.0645995	0.446429	1.33929	3.57143	0.710594	3.68217	4.19897	7.37705	10.1671	2.94118	7.22892	5.66038	7.67386	5.26316	9.66387	224	1548	0.934287	0.982237	KLy	LOSS	CDS	min25k.min10pr
PhMm_Aggr_CardvascMuscle_all__LOSS	-0.421417	0.214095	0.168825	-0.772562	-0.42042	0.243597	0.21984	-0.657893	-0.399086	0.245078	0.217714	-0.662114	-0.401895	0.24531	0.218674	-0.660203	3.57143	5.29716	0.446429	0.581395	0	0.0645995	0	0.0645995	0	0.0645995	0.446429	0.892857	2.23214	0.516796	1.93798	2.84238	4.91803	4.87465	1.96078	5.66265	3.77358	4.43645	3.50877	6.30252	224	1548	0.934287	0.982237	KLy	LOSS	CDS	min25k.min10pr
HI_q4__LOSS	-0.409436	0.205223	0.16033	-0.794986	-0.424075	0.228126	0.206737	-0.684581	-0.384025	0.249974	0.224077	-0.649604	-0.406611	0.224732	0.199698	-0.699627	4.01786	6.13695	0.446429	0.581395	0	0.193798	0	0.129199	0	0.0645995	0.446429	0.892857	2.67857	0.516796	2.26098	3.35917	2.45902	6.68524	5.88235	5.66265	5.66038	5.51559	3.50877	6.86275	224	1548	0.934287	0.982237	KLy	LOSS	CDS	min25k.min10pr
Neurof_PathwaysAxonG__LOSS	-13.0243	0.970986	0.112987	-0.946972	-12.918	0.970387	0.134566	-0.871065	-12.9125	0.970211	0.131889	-0.879792	-12.8342	0.968723	0.127505	-0.894473	0	0.710594	0	0.0645995	0	0.0645995	0	0	0	0	0	0	0	0.193798	0.258398	0.258398	0	0.417827	0	0.963855	0	0.839329	0	0.560224	224	1548	0.934287	0.982237	KLy	LOSS	CDS	min25k.min10pr
FMR1_Targets_Darnell__GAIN	0.449273	0.0141479	0.0178425	1.74854	0.51401	0.0161103	0.0187952	1.72595	0.387954	0.0441883	0.0491396	1.30857	0.411705	0.0342579	0.0388788	1.41029	10.7143	6.71835	3.125	0.452196	0.446429	0.0645995	0	0.0645995	0	0.0645995	2.67857	4.46429	3.57143	1.35659	3.29457	2.06718	11.4754	6.82451	9.80392	6.62651	7.54717	5.9952	11.6959	7.56303	224	1548	0.319518	0.799178	KLy	GAIN	CDS	min25k.min10pr
Neurof_UnionStringent__GAIN	0.30807	0.0322984	0.0387301	1.41195	0.352567	0.0402547	0.0437167	1.35935	0.241547	0.135761	0.142234	0.846997	0.275037	0.0895207	0.0956878	1.01914	12.0536	7.68734	2.23214	1.22739	0.892857	0.322997	0.446429	0.193798	0.446429	0.0645995	3.57143	4.46429	4.01786	1.61499	3.29457	2.77778	12.2951	6.40669	11.7647	8.79518	9.43396	7.31415	12.8655	8.12325	224	1548	0.519363	0.799178	KLy	GAIN	CDS	min25k.min10pr
Neurof_GoNervSysDev__GAIN	0.265438	0.0393286	0.0489469	1.31027	0.314783	0.0498468	0.053824	1.26902	0.198931	0.177195	0.185396	0.731899	0.242834	0.102271	0.110334	0.95729	14.7321	11.7571	4.01786	2.32558	0.892857	0.645995	0.446429	0.193798	0.446429	0.129199	4.46429	6.69643	3.57143	2.45478	5.62016	3.68217	17.2131	9.1922	11.7647	13.9759	18.8679	12.2302	13.4503	11.2045	224	1548	0.519363	0.799178	KLy	GAIN	CDS	min25k.min10pr
Neurof_GoNeuronProj__GAIN	0.339982	0.0416925	0.053482	1.27179	0.364221	0.0581595	0.066624	1.17637	0.266227	0.137514	0.150293	0.82306	0.310322	0.0873672	0.0989074	1.00477	12.5	8.01034	1.33929	0.968992	0.892857	0.322997	0	0.193798	0	0	3.57143	4.46429	4.46429	1.42119	3.10078	3.48837	12.2951	6.68524	12.7451	9.15663	9.43396	7.79376	13.4503	8.26331	224	1548	0.519363	0.799178	KLy	GAIN	CDS	min25k.min10pr
Neurof_GoNervTransm__GAIN	0.388259	0.0769625	0.0827772	1.08209	0.38208	0.102941	0.107806	0.967358	0.280596	0.253003	0.256485	0.590938	0.311198	0.206028	0.209282	0.679267	8.03571	4.84496	0.446429	0.387597	0.446429	0	0.446429	0	0.446429	0	2.67857	1.78571	3.57143	1.35659	1.93798	1.55039	8.19672	3.76045	7.84314	5.78313	9.43396	3.71703	7.60234	6.16246	224	1548	0.519363	0.799178	KLy	GAIN	CDS	min25k.min10pr
Neurof_GoSynaptic__GAIN	0.417365	0.0908596	0.102751	0.988215	0.412018	0.124553	0.134849	0.870153	0.29856	0.273701	0.282063	0.549654	0.333211	0.222391	0.231614	0.635235	5.35714	3.94057	1.33929	0.322997	0.446429	0	0.446429	0	0	0	1.78571	1.33929	2.23214	0.710594	1.80879	1.42119	5.7377	3.62117	4.90196	4.21687	5.66038	3.71703	5.26316	4.20168	224	1548	0.519363	0.799178	KLy	GAIN	CDS	min25k.min10pr
Kirov_ARC__GAIN	1.4624	0.106614	0.140372	0.85272	1.44983	0.110003	0.143707	0.842521	1.3844	0.131123	0.163833	0.7856	1.33948	0.147584	0.179881	0.745014	0.892857	0.258398	0	0	0	0	0	0	0	0	0	0	0.892857	0.0645995	0.129199	0.0645995	0	0.139276	1.96078	0.361446	0	0.359712	1.16959	0.140056	224	1548	0.519363	0.799178	KLy	GAIN	CDS	min25k.min10pr
Neurof_UnionInclusive__GAIN	0.155848	0.112845	0.127795	0.893486	0.187235	0.151448	0.15469	0.810537	0.0913885	0.417926	0.42332	0.373332	0.126706	0.260717	0.269285	0.569789	20.9821	17.0543	5.80357	4.19897	1.33929	1.22739	0.446429	0.322997	0.446429	0.193798	5.35714	8.48214	7.14286	3.10078	8.07494	5.87855	23.7705	14.2061	17.6471	19.5181	22.6415	17.0264	20.4678	17.0868	224	1548	0.519363	0.927519	KLy	GAIN	CDS	min25k.min10pr
GI_q4__GAIN	0.113926	0.120325	0.136277	0.865576	0.14787	0.15291	0.156336	0.805942	0.07123	0.382461	0.391488	0.407282	0.0987463	0.238059	0.249451	0.603014	25.8929	22.6098	9.82143	6.84755	4.91071	2.39018	2.67857	1.16279	0.892857	0.581395	4.91071	12.5	8.48214	3.22997	10.3359	9.04393	26.2295	17.8273	25.4902	26.747	26.4151	20.9832	25.731	24.5098	224	1548	0.519363	0.927519	KLy	GAIN	CDS	min25k.min10pr
BspanVHM_PstNat__GAIN	0.127418	0.126367	0.14238	0.846552	0.174509	0.158121	0.157819	0.80184	0.0803971	0.380347	0.389302	0.409713	0.0984135	0.281571	0.293089	0.533001	18.3036	14.7933	5.80357	4.52196	2.67857	1.48579	2.23214	0.581395	1.33929	0.452196	4.91071	8.48214	4.91071	2.64858	6.71835	5.42636	22.1311	13.649	13.7255	15.7831	20.7547	13.9089	17.5439	15.8263	224	1548	0.519363	0.927519	KLy	GAIN	CDS	min25k.min10pr
PhHs_NervSys_ADX__GAIN	0.309296	0.10411	0.123217	0.909331	0.307957	0.149398	0.162911	0.78805	0.203349	0.340217	0.351515	0.454056	0.251255	0.238312	0.25181	0.598926	7.14286	5.29716	1.33929	0.387597	0.446429	0.258398	0.446429	0.193798	0.446429	0	1.33929	4.91071	0.892857	1.03359	2.39018	1.87339	9.83607	4.45682	3.92157	6.0241	5.66038	5.15588	7.60234	5.46218	224	1548	0.519363	0.927519	KLy	GAIN	CDS	min25k.min10pr
FMR1_Targets_Ascano__GAIN	0.307671	0.109004	0.123469	0.908441	0.313574	0.152018	0.162937	0.787979	0.223805	0.268952	0.280639	0.551852	0.261714	0.201843	0.214409	0.668758	9.82143	7.88114	2.23214	0.710594	0.446429	0.193798	0	0	0	0	1.78571	5.80357	2.23214	1.48579	3.94057	2.45478	10.6557	6.96379	8.82353	8.6747	13.2075	7.91367	8.77193	7.84314	224	1548	0.519363	0.799178	KLy	GAIN	CDS	min25k.min10pr
Neurof_GoNeuronBody__GAIN	0.460213	0.157226	0.168128	0.77436	0.437018	0.213068	0.22046	0.65667	0.288858	0.43059	0.432586	0.363928	0.326431	0.371082	0.373535	0.427669	2.67857	1.93798	0.446429	0.193798	0.446429	0	0.446429	0	0	0	0.446429	1.33929	0.892857	0.516796	0.452196	0.968992	3.27869	1.94986	1.96078	1.92771	3.77358	2.27818	2.33918	1.54062	224	1548	0.591761	0.927519	KLy	GAIN	CDS	min25k.min10pr
PhMm_CompleteLethality__GAIN	0.296871	0.277478	0.294767	0.530521	0.263498	0.369057	0.380877	0.419215	0.165835	0.565843	0.572316	0.242364	0.214543	0.458226	0.467583	0.330141	5.80357	4.71576	0.892857	0.387597	0	0	0	0	0	0	1.78571	2.23214	1.78571	1.16279	2.26098	1.29199	9.01639	3.34262	1.96078	5.90361	9.43396	4.55635	4.67836	4.90196	224	1548	0.739585	0.936681	KLy	GAIN	CDS	min25k.min10pr
PhMm_Aggr_Sensory_all__GAIN	0.180099	0.274706	0.288556	0.539769	0.165451	0.389455	0.396416	0.401849	0.0701267	0.703194	0.704655	0.152023	0.0947844	0.612913	0.615514	0.210762	9.82143	8.59173	1.78571	1.74419	0.446429	0.129199	0.446429	0	0.446429	0	2.23214	5.35714	2.23214	1.80879	2.97158	3.81137	11.4754	7.93872	7.84314	9.15663	11.3208	8.99281	9.35673	8.12325	224	1548	0.739585	0.936681	KLy	GAIN	CDS	min25k.min10pr
BspanHM_lg2rpkm3.21__GAIN	0.0725589	0.287918	0.307677	0.511905	0.0783844	0.428591	0.431759	0.364759	0.0267004	0.726511	0.72957	0.136933	0.0477324	0.536902	0.545186	0.263455	23.6607	24.2894	11.1607	7.29974	3.57143	2.32558	1.78571	1.22739	1.33929	0.775194	6.25	11.1607	6.25	4.19897	11.3049	8.78553	24.5902	22.5627	22.549	25.7831	20.7547	22.4221	24.5614	26.4706	224	1548	0.739585	0.936681	KLy	GAIN	CDS	min25k.min10pr
HI_q2__GAIN	0.0783405	0.319367	0.335327	0.474532	0.0956065	0.465099	0.468174	0.329592	0.0191473	0.831912	0.83296	0.0793758	0.0533564	0.546524	0.553521	0.256866	25.4464	23.5142	6.69643	7.04134	3.125	2.45478	2.23214	0.839793	0.892857	0.387597	7.14286	10.2679	8.03571	4.06977	10.5297	8.91473	24.5902	21.0306	26.4706	25.6627	26.4151	23.2614	25.1462	23.8095	224	1548	0.739585	0.936681	KLy	GAIN	CDS	min25k.min10pr
BspanVH_lg2rpkm4.74__GAIN	0.072781	0.317006	0.334987	0.474972	0.077057	0.478277	0.478101	0.32048	0.0267022	0.737476	0.74009	0.130715	0.0439258	0.579275	0.586153	0.231989	19.1964	16.9251	7.14286	5.55556	4.01786	2.45478	1.78571	1.09819	0.892857	0.516796	3.57143	8.03571	7.58929	2.19638	9.17313	5.55556	21.3115	16.0167	16.6667	17.7108	24.5283	16.9065	17.5439	16.9468	224	1548	0.739585	0.936681	KLy	GAIN	CDS	min25k.min10pr
Kirov_NMDAR__GAIN	0.623461	0.446056	0.471335	0.32667	0.596616	0.465341	0.489102	0.310601	0.543407	0.50623	0.526776	0.278374	0.560248	0.492316	0.514028	0.289013	0.892857	0.452196	0	0	0	0	0	0	0	0	0	0	0.892857	0.129199	0.193798	0.129199	0	0.417827	1.96078	0.481928	0	0.359712	1.16959	0.560224	224	1548	0.739585	0.936681	KLy	GAIN	CDS	min25k.min10pr
Neurof_GoNervSysDev_CNS__GAIN	0.192447	0.356831	0.374046	0.427075	0.161099	0.480519	0.489833	0.309952	0.0589354	0.798064	0.799537	0.0971612	0.113451	0.62419	0.628925	0.201401	6.69643	6.13695	1.33929	0.775194	0.446429	0.258398	0.446429	0.0645995	0	0	2.67857	2.67857	1.33929	1.67959	2.84238	1.61499	9.01639	4.73538	3.92157	7.3494	5.66038	6.11511	7.01754	6.16246	224	1548	0.739585	0.936681	KLy	GAIN	CDS	min25k.min10pr
PhMm_NeuroBehav_all__GAIN	0.0994871	0.337153	0.357484	0.446743	0.0876859	0.502308	0.507409	0.294642	0.0142964	0.905267	0.905577	0.0430747	0.0459199	0.696329	0.699786	0.155035	13.3929	12.8553	4.46429	1.87339	0.446429	0.710594	0.446429	0.387597	0.446429	0.258398	4.01786	4.91071	4.46429	2.19638	5.42636	5.23256	13.1148	11.1421	13.7255	14.3373	16.9811	12.2302	12.2807	13.5854	224	1548	0.739585	0.936681	KLy	GAIN	CDS	min25k.min10pr
PhMm_NeuroUnion_all__GAIN	0.0791353	0.336969	0.35488	0.449919	0.073713	0.509091	0.511033	0.291551	0.00767371	0.936551	0.936681	0.0284082	0.0351906	0.712424	0.715421	0.145438	19.6429	18.0233	6.25	5.03876	2.23214	1.48579	0.446429	0.516796	0.446429	0.322997	4.91071	9.82143	4.91071	3.16537	7.75194	7.10594	19.6721	15.5989	19.6078	20.1205	22.6415	17.7458	18.7135	18.3473	224	1548	0.739585	0.936681	KLy	GAIN	CDS	min25k.min10pr
BspanVHM_EqlNat__GAIN	0.0989694	0.340012	0.357861	0.446285	0.0903942	0.509848	0.51427	0.288808	0.0339825	0.764715	0.76694	0.115239	0.0643438	0.57864	0.585393	0.232552	15.625	15.3101	4.91071	3.87597	2.23214	1.22739	0.892857	0.387597	0.892857	0.129199	4.91071	6.25	4.46429	2.71318	7.55814	5.03876	15.5738	13.9276	15.6863	16.506	15.0943	14.7482	15.7895	15.9664	224	1548	0.739585	0.936681	KLy	GAIN	CDS	min25k.min10pr
PhMm_NervSystem_all__GAIN	0.0970571	0.345138	0.362461	0.440739	0.0869131	0.517261	0.519974	0.284018	0.0140441	0.905275	0.905579	0.0430735	0.043216	0.713677	0.716725	0.144647	16.5179	14.4057	4.46429	3.68217	0.892857	0.775194	0.446429	0.387597	0.446429	0.258398	4.01786	8.48214	4.01786	2.77778	6.00775	5.62016	18.8525	12.6741	13.7255	15.9036	20.7547	14.7482	15.2047	14.0056	224	1548	0.739585	0.936681	KLy	GAIN	CDS	min25k.min10pr
HI_q1__GAIN	0.0521029	0.34233	0.362499	0.440693	0.0500981	0.519437	0.526367	0.278711	0.0220059	0.715168	0.720088	0.142615	0.0375217	0.537954	0.549925	0.259697	21.875	22.5452	7.14286	7.75194	4.91071	3.35917	3.125	1.42119	1.78571	0.904393	4.91071	9.82143	7.14286	3.61757	10.4005	8.52713	22.9508	20.8914	20.5882	23.9759	13.2075	22.7818	24.5614	22.2689	224	1548	0.739585	0.936681	KLy	GAIN	CDS	min25k.min10pr
SynKEGG_GABAergic__GAIN	0.361997	0.454654	0.471015	0.326965	0.311682	0.528346	0.538638	0.268703	0.0957399	0.857797	0.858022	0.0665017	0.136187	0.797022	0.797768	0.0981234	0.892857	0.968992	0.446429	0	0.446429	0	0	0	0	0	0.446429	0.446429	0	0	0.452196	0.516796	1.63934	0.696379	0	1.20482	0	0.959233	1.16959	0.980392	224	1548	0.739585	0.936681	KLy	GAIN	CDS	min25k.min10pr
GOP_lessthan500g__GAIN	0.0187859	0.448424	0.460279	0.336979	0.0443507	0.674839	0.672624	0.172228	-0.0113157	0.724442	0.721372	-0.141841	0.00530098	0.864561	0.865351	0.0628077	44.6429	47.8682	29.0179	28.3592	19.6429	17.3127	12.0536	10.7235	8.92857	7.49354	9.82143	22.3214	12.5	7.23514	22.739	17.8941	46.7213	44.0111	42.1569	51.2048	37.7358	46.4029	46.7836	49.5798	224	1548	0.873791	0.936681	KLy	GAIN	CDS	min25k.min10pr
PhHs_MindFun_ADX__GAIN	0.329987	0.615422	0.626511	0.203071	0.246701	0.714356	0.7202	0.142547	0.058984	0.932472	0.932824	0.0302003	0.122357	0.859391	0.860889	0.0650529	1.33929	0.904393	0	0	0	0	0	0	0	0	0.892857	0.446429	0	0.322997	0.258398	0.322997	0.819672	0.835655	1.96078	0.963855	0	0.839329	1.75439	0.980392	224	1548	0.873791	0.936681	KLy	GAIN	CDS	min25k.min10pr
GI_q1__GAIN	0.0359703	0.496466	0.512069	0.290671	0.0212089	0.780168	0.782576	0.106473	0.00769631	0.894754	0.895562	0.0479042	0.0233606	0.687087	0.693831	0.158746	24.5536	23.1266	8.03571	8.46253	3.57143	3.48837	3.125	1.93798	1.78571	1.03359	4.01786	11.6071	8.92857	3.74677	10.7235	8.65633	26.2295	22.1448	22.549	23.9759	18.8679	23.0216	26.3158	23.2493	224	1548	0.873791	0.936681	KLy	GAIN	CDS	min25k.min10pr
BspanLA_lg2rpkm.MIN__GAIN	0.0261643	0.507686	0.520125	0.283892	0.0144867	0.80094	0.801849	0.0959072	-0.0165958	0.743067	0.738593	-0.131595	0.0121341	0.792817	0.795403	0.099413	22.7679	26.0336	13.8393	11.2403	7.14286	5.36176	5.35714	3.68217	3.57143	2.19638	4.01786	12.9464	5.80357	4.45736	11.1757	10.4005	22.1311	22.5627	23.5294	29.0361	16.9811	25.2998	24.5614	26.8908	224	1548	0.873791	0.936681	KLy	GAIN	CDS	min25k.min10pr
PhHs_NervSys_All__GAIN	0.0730683	0.577785	0.586049	0.232066	0.0355942	0.8215	0.822392	0.0849213	-0.0178123	0.900853	0.900501	-0.0455156	0.0154884	0.914297	0.914544	0.0387955	11.1607	12.0155	3.125	2.64858	1.33929	0.710594	0.892857	0.322997	0.446429	0.193798	1.78571	7.58929	1.78571	1.61499	5.94315	4.45736	13.1148	10.585	8.82353	13.253	7.54717	12.1103	12.2807	11.9048	224	1548	0.873791	0.936681	KLy	GAIN	CDS	min25k.min10pr
GI_q3__GAIN	0.0473007	0.576524	0.583833	0.233711	0.0127963	0.91867	0.918758	0.0367986	-0.0206431	0.827843	0.826815	-0.0825917	0.00449249	0.96258	0.962632	0.0165399	23.6607	21.2532	8.03571	6.39535	2.23214	2.06718	0.892857	1.09819	0.446429	0.710594	5.35714	12.9464	5.35714	3.74677	10.2713	7.23514	24.5902	19.9164	22.549	22.4096	24.5283	21.1031	23.3918	21.4286	224	1548	0.956259	0.936681	KLy	GAIN	CDS	min25k.min10pr
PhMm_Aggr_CardvascMuscle_all__GAIN	0.0502262	0.68907	0.693767	0.158786	-0.000475406	0.997595	0.997595	-0.00104591	-0.0455617	0.740085	0.737493	-0.132242	-0.0164052	0.906267	0.90589	-0.0429245	15.625	12.6615	3.125	3.61757	0.892857	0.904393	0	0.452196	0	0.193798	4.46429	7.14286	4.01786	2.58398	5.62016	4.45736	17.2131	11.4206	13.7255	13.7349	15.0943	11.3909	15.7895	14.1457	224	1548	0.997595	0.936681	KLy	GAIN	CDS	min25k.min10pr
PSD_BayesGrant_fullset__GAIN	0.046861	0.795865	0.79768	0.0981713	-0.0137884	0.94664	0.94657	-0.023847	-0.0203328	0.912107	0.911807	-0.0400969	0.00977891	0.958082	0.958152	0.0185657	10.7143	10.0129	1.33929	1.42119	0.446429	0.193798	0	0.129199	0	0.0645995	2.23214	4.46429	4.01786	1.55039	4.45736	4.00517	9.83607	9.47075	11.7647	10.4819	9.43396	9.95204	11.1111	10.084	224	1548	0.965502	0.936681	KLy	GAIN	CDS	min25k.min10pr
HI_q4__GAIN	0.0224531	0.811776	0.813477	0.0896547	-0.027821	0.818075	0.817592	-0.0874635	-0.057625	0.583802	0.577205	-0.23867	-0.0266601	0.802326	0.800668	-0.0965474	20.0893	20.3488	6.25	5.49096	2.23214	1.87339	1.78571	0.710594	0.892857	0.452196	5.35714	9.375	5.35714	3.74677	10.0129	6.58915	22.1311	18.1058	17.6471	22.2892	16.9811	18.4652	21.0526	22.549	224	1548	0.873791	0.936681	KLy	GAIN	CDS	min25k.min10pr
PhMm_Aggr_SkeCranioLimbs_all__GAIN	0.0148721	0.91464	0.915696	0.0382487	-0.0383335	0.816076	0.811669	-0.0906213	-0.087548	0.587082	0.564589	-0.248267	-0.0571372	0.723416	0.71314	-0.146825	9.82143	10.7881	1.78571	1.67959	1.33929	0.258398	0.446429	0.193798	0	0.129199	2.23214	5.35714	2.23214	1.67959	5.23256	3.87597	12.2951	8.91365	6.86275	12.4096	13.2075	10.7914	8.77193	10.7843	224	1548	0.873791	0.936681	KLy	GAIN	CDS	min25k.min10pr
BspanVHM_PreNat__GAIN	0.0235984	0.837229	0.83843	0.0765333	-0.0344046	0.809795	0.809294	-0.0918935	-0.0434765	0.719468	0.716436	-0.144822	-0.0190165	0.875458	0.874834	-0.0580745	15.625	15.0517	4.91071	4.13437	1.78571	1.35659	0.446429	0.581395	0	0.258398	1.78571	8.92857	4.91071	2.39018	7.55814	5.10336	18.8525	14.2061	11.7647	15.7831	15.0943	14.6283	15.7895	15.5462	224	1548	0.873791	0.936681	KLy	GAIN	CDS	min25k.min10pr
PhMm_Aggr_IntegAdipPigm_all__GAIN	-0.00314356	0.98351	0.983498	-0.00722631	-0.0643287	0.709808	0.707217	-0.150447	-0.121256	0.462781	0.454666	-0.342307	-0.0957147	0.565985	0.560613	-0.251337	11.1607	11.1111	2.23214	3.22997	0.892857	0.581395	0.446429	0.0645995	0.446429	0.0645995	4.91071	1.78571	4.46429	2.26098	4.45736	4.39276	11.4754	9.88858	10.7843	12.1687	13.2075	10.1918	10.5263	12.1849	224	1548	0.873791	0.927519	KLy	GAIN	CDS	min25k.min10pr
PhHs_MindFun_All__GAIN	-0.0675634	0.838075	0.836603	-0.0774807	-0.129392	0.704328	0.699978	-0.154916	-0.169062	0.617233	0.609353	-0.215131	-0.141193	0.677577	0.672087	-0.172574	3.57143	4.65116	0.892857	0.322997	0	0	0	0	0	0	0.892857	1.78571	0.892857	0.775194	1.87339	2.00258	3.27869	4.5961	3.92157	4.6988	3.77358	4.67626	3.50877	4.62185	224	1548	0.873791	0.936681	KLy	GAIN	CDS	min25k.min10pr
Neurof_PathwaysAxonG__GAIN	-0.166619	0.70818	0.700476	-0.154607	-0.264287	0.565037	0.551063	-0.258799	-0.281571	0.530186	0.512046	-0.290691	-0.248243	0.581296	0.566553	-0.246759	2.23214	2.45478	0	0.452196	0	0	0	0	0	0	1.33929	0.446429	0.446429	0.710594	1.03359	0.710594	2.45902	1.81058	1.96078	3.01205	1.88679	2.39808	2.33918	2.52101	224	1548	0.739585	0.936681	KLy	GAIN	CDS	min25k.min10pr
SynKEGG_Glutamatergic__GAIN	-0.741707	0.480402	0.435114	-0.361397	-0.75602	0.472092	0.425593	-0.371006	-0.731778	0.486286	0.441872	-0.354703	-0.723537	0.491294	0.447671	-0.349041	0.446429	0.775194	0	0	0	0	0	0	0	0	0	0	0.446429	0.0645995	0.322997	0.387597	0	0.278552	0.980392	1.20482	0	0.359712	0.584795	1.2605	224	1548	0.739585	0.927519	KLy	GAIN	CDS	min25k.min10pr
Neurof_KeggSynaptic__GAIN	-0.247802	0.540958	0.523288	-0.281259	-0.333061	0.42141	0.39879	-0.399255	-0.446672	0.269931	0.24518	-0.610515	-0.394394	0.328081	0.304058	-0.517044	1.78571	2.71318	0.446429	0.193798	0.446429	0	0	0	0	0	0.446429	0.446429	0.892857	0.322997	1.29199	1.09819	1.63934	1.94986	1.96078	3.37349	0	1.55875	2.33918	4.06162	224	1548	0.739585	0.799178	KLy	GAIN	CDS	min25k.min10pr
SynKEGG_Serotonergic__GAIN	-0.774497	0.462196	0.414629	-0.38234	-0.840477	0.427405	0.375521	-0.425366	-1.09408	0.3275	0.264414	-0.577715	-1.02767	0.350729	0.290157	-0.537367	0.446429	0.775194	0	0	0	0	0	0	0	0	0.446429	0	0	0	0.452196	0.322997	0.819672	0.557103	0	0.963855	0	0.479616	0.584795	1.12045	224	1548	0.739585	0.799178	KLy	GAIN	CDS	min25k.min10pr
PhMm_Aggr_DigestHepato_all__GAIN	-0.0874097	0.63833	0.632039	-0.199256	-0.184156	0.381129	0.36889	-0.433103	-0.205843	0.29615	0.278695	-0.554872	-0.184619	0.355421	0.34019	-0.468279	8.48214	10.7235	2.23214	2.19638	0.446429	0.322997	0	0.129199	0	0.0645995	1.78571	4.46429	2.23214	2.26098	4.45736	4.00517	11.4754	7.79944	4.90196	13.253	7.54717	11.1511	8.77193	10.2241	224	1548	0.739585	0.799178	KLy	GAIN	CDS	min25k.min10pr
GI_q2__GAIN	-0.0348364	0.718695	0.714661	-0.1459	-0.127824	0.3115	0.299808	-0.523156	-0.124828	0.245717	0.227816	-0.642416	-0.102729	0.340982	0.326436	-0.486202	14.2857	19.3152	4.91071	6.00775	2.67857	2.32558	2.23214	1.03359	1.33929	0.710594	5.35714	6.25	2.67857	3.22997	10.7235	5.36176	13.1148	18.663	15.6863	19.8795	15.0943	19.3046	14.0351	19.3277	224	1548	0.739585	0.799178	KLy	GAIN	CDS	min25k.min10pr
PhMm_Aggr_EndoExocrRepr_all__GAIN	-0.0872553	0.541282	0.531595	-0.274419	-0.207049	0.226022	0.215143	-0.667272	-0.234831	0.143068	0.124155	-0.906036	-0.178102	0.256509	0.238941	-0.621708	13.3929	14.3411	3.125	3.29457	0.446429	0.710594	0.446429	0.258398	0	0.193798	4.01786	4.46429	4.91071	2.84238	6.33075	5.16796	18.0328	12.2563	7.84314	16.1446	11.3208	13.0695	14.0351	15.8263	224	1548	0.591761	0.799178	KLy	GAIN	CDS	min25k.min10pr
PhMm_Aggr_HematoImmune_all__GAIN	-0.0833954	0.503878	0.49063	-0.309246	-0.195953	0.187428	0.17669	-0.752787	-0.162722	0.213992	0.191443	-0.71796	-0.149457	0.264329	0.24278	-0.614787	14.7321	15.4393	2.67857	4.97416	1.33929	1.74419	0.446429	0.645995	0	0.322997	3.125	6.69643	4.91071	2.45478	6.71835	6.26615	14.7541	12.2563	14.7059	18.1928	16.9811	15.1079	14.0351	15.8263	224	1548	0.530071	0.799178	KLy	GAIN	CDS	min25k.min10pr
HI_q3__GAIN	-0.0573243	0.549812	0.538545	-0.268778	-0.190737	0.141943	0.131566	-0.880857	-0.139358	0.181327	0.158071	-0.801148	-0.122558	0.252451	0.229488	-0.639239	20.0893	21.8346	6.69643	6.33075	2.67857	2.06718	1.33929	1.16279	0	0.645995	4.46429	10.7143	4.91071	3.81137	10.8527	7.17054	23.7705	19.9164	15.6863	23.494	15.0943	20.1439	21.6374	23.8095	224	1548	0.519363	0.799178	KLy	GAIN	CDS	min25k.min10pr
BspanML_lg2rpkm0.93__GAIN	-0.0512338	0.516962	0.508256	-0.293918	-0.172155	0.115673	0.108938	-0.962822	-0.124543	0.148546	0.133756	-0.873686	-0.108501	0.220702	0.205943	-0.686254	26.3393	26.6796	8.03571	10.4005	4.01786	4.45736	1.33929	1.93798	1.33929	1.16279	5.80357	13.8393	6.69643	4.39276	13.0491	9.23773	25.4098	22.5627	27.451	30.241	20.7547	25.2998	28.0702	28.2913	224	1548	0.519363	0.799178	KLy	GAIN	CDS	min25k.min10pr
SynKEGG_Dopaminergic__GAIN	-13.6898	0.965854	0.0138226	-1.85941	-13.8088	0.965295	0.010239	-1.98974	-13.7609	0.965454	0.0109688	-1.95984	-13.7166	0.965686	0.0128117	-1.89239	0	1.16279	0	0.0645995	0	0	0	0	0	0	0	0	0	0.0645995	0.516796	0.581395	0	0.557103	0	1.68675	0	0.479616	0	1.96078	224	1548	0.261094	0.279705	KLy	GAIN	CDS	min25k.min10pr
SynKEGG_Cholinergic__GAIN	-14.7945	0.977405	0.0111511	-1.95268	-14.8315	0.977315	0.00993351	-2.0029	-14.8135	0.977347	0.0104743	-1.97987	-14.8029	0.977357	0.0108253	-1.96556	0	1.29199	0	0	0	0	0	0	0	0	0	0	0	0.0645995	0.775194	0.452196	0	0.835655	0	1.68675	0	0.719424	0	1.96078	224	1548	0.261094	0.279705	KLy	GAIN	CDS	min25k.min10pr
PhMm_Aggr_EndoExocrRepr_all__LOSS	0.193447	0.234746	0.286099	0.543483	0.892353	0.0045762	0.00762782	2.1176	0.629653	0.0288269	0.0396342	1.40193	0.606015	0.0248268	0.041864	1.37816	5.99078	3.43688	0.921659	0.330469	0	0.0660939	0	0.0660939	0	0.0660939	0	2.30415	3.68664	0.132188	1.32188	1.98282	5.88235	3.54108	6.12245	3.34572	7.84314	3.19803	5.42169	3.71429	217	1513	0.389019	0.960126	KLn	LOSS	CDS	min25k.min10pr
PhMm_NeuroUnion_all__LOSS	0.0764873	0.534813	0.572504	0.242222	0.598277	0.0235974	0.027358	1.56292	0.329864	0.145251	0.158526	0.799901	0.308361	0.154001	0.180354	0.743875	9.67742	6.74157	0.921659	0.793126	0	0.0660939	0	0.0660939	0	0.0660939	0	3.22581	6.45161	0.396563	2.64375	3.70126	11.7647	6.37394	7.14286	7.0632	15.6863	6.02706	7.83133	7.57143	217	1513	0.69763	0.960126	KLn	LOSS	CDS	min25k.min10pr
PhMm_Aggr_IntegAdipPigm_all__LOSS	0.149315	0.429528	0.472284	0.325797	0.630129	0.0526933	0.0637332	1.19563	0.419121	0.162124	0.180298	0.74401	0.384062	0.196766	0.218509	0.660531	5.99078	3.50297	0	0.396563	0	0.0660939	0	0.0660939	0	0.0660939	0	0.921659	5.06912	0.198282	1.18969	2.115	8.40336	2.9745	3.06122	3.9653	9.80392	3.32103	4.81928	3.71429	217	1513	0.709398	0.960126	KLn	LOSS	CDS	min25k.min10pr
FMR1_Targets_Darnell__LOSS	0.627948	0.194443	0.228355	0.64139	1.07511	0.048858	0.0695488	1.15771	0.852028	0.0989979	0.127857	0.893277	0.87008	0.0907505	0.119046	0.924285	2.30415	1.1236	0	0.132188	0	0	0	0	0	0	0	0.460829	1.84332	0.264375	0.528751	0.330469	2.52101	1.27479	2.04082	0.991326	3.92157	1.10701	1.80723	1.14286	217	1513	0.709398	0.960126	KLn	LOSS	CDS	min25k.min10pr
PhMm_NervSystem_all__LOSS	0.0501949	0.741323	0.757845	0.12042	0.516796	0.0885996	0.0996442	1.00155	0.291548	0.284625	0.299568	0.523505	0.277688	0.290729	0.315615	0.500843	6.45161	4.95704	0.921659	0.462657	0	0.0660939	0	0.0660939	0	0.0660939	0	2.76498	3.68664	0.264375	2.37938	2.31328	6.72269	5.09915	6.12245	4.83271	7.84314	4.18204	6.0241	5.85714	217	1513	0.764292	0.960126	KLn	LOSS	CDS	min25k.min10pr
Neurof_GoNervTransm__LOSS	0.237683	0.442649	0.484035	0.315123	0.816965	0.082451	0.104903	0.979213	0.623817	0.168919	0.196269	0.707147	0.61733	0.172008	0.199901	0.699185	2.30415	1.32188	0.460829	0.132188	0	0.0660939	0	0.0660939	0	0.0660939	0	1.38249	0.921659	0.0660939	0.793126	0.462657	2.52101	1.55807	2.04082	1.11524	3.92157	0.98401	1.80723	1.71429	217	1513	0.764292	0.960126	KLn	LOSS	CDS	min25k.min10pr
PhMm_NeuroBehav_all__LOSS	0.0766038	0.677334	0.697547	0.156427	0.471429	0.132459	0.146173	0.835134	0.29281	0.316384	0.330498	0.480831	0.269167	0.354857	0.3702	0.431563	6.45161	4.36219	0	0.330469	0	0.0660939	0	0.0660939	0	0.0660939	0	1.84332	4.60829	0.330469	1.58625	2.44547	7.56303	3.96601	5.10204	4.7088	7.84314	3.93604	6.0241	4.85714	217	1513	0.815489	0.960126	KLn	LOSS	CDS	min25k.min10pr
Neurof_UnionInclusive__LOSS	0.0259828	0.866142	0.871846	0.0595601	0.459862	0.139064	0.152069	0.817961	0.235779	0.397657	0.410941	0.386221	0.20806	0.444248	0.464552	0.332966	6.45161	5.3536	0.460829	0.462657	0	0.132188	0	0.0660939	0	0.0660939	0	2.76498	3.68664	0.198282	1.91672	3.2386	6.72269	5.66572	6.12245	5.08055	7.84314	5.28905	6.0241	5.42857	217	1513	0.815489	0.960126	KLn	LOSS	CDS	min25k.min10pr
PhMm_CompleteLethality__LOSS	0.504572	0.330689	0.360062	0.443623	0.814848	0.147298	0.17589	0.754759	0.643472	0.241496	0.269601	0.569279	0.581886	0.292711	0.318015	0.497552	1.84332	0.925314	0	0.132188	0	0	0	0	0	0	0	0	1.84332	0.0660939	0.198282	0.660939	2.52101	0.424929	1.02041	1.36307	5.88235	0.615006	0.60241	1.28571	217	1513	0.815489	0.960126	KLn	LOSS	CDS	min25k.min10pr
BspanLA_lg2rpkm.MIN__LOSS	-0.0518809	0.632942	0.615808	-0.210554	0.199858	0.246122	0.252327	0.598037	-0.00204937	0.986385	0.986372	-0.00595909	-0.0199784	0.866761	0.865552	-0.0627066	15.6682	11.8308	1.84332	3.76735	0.921659	1.32188	0	0.85922	0	0.594845	0.460829	3.68664	11.5207	0.85922	4.23001	6.74157	14.2857	12.0397	17.3469	11.6481	13.7255	10.8241	16.2651	13	217	1513	0.849831	0.998255	KLn	LOSS	CDS	min25k.min10pr
PhHs_NervSys_All__LOSS	0.0684091	0.815274	0.81784	0.0873316	0.357946	0.297591	0.3115	0.506541	0.186882	0.563869	0.571298	0.243138	0.1481	0.649894	0.654752	0.183923	5.52995	4.69266	0	0.264375	0	0.0660939	0	0.0660939	0	0.0660939	0	0.921659	4.60829	0.198282	2.115	2.37938	5.88235	4.39093	5.10204	4.95663	5.88235	4.42804	5.42169	5	217	1513	0.849831	0.960126	KLn	LOSS	CDS	min25k.min10pr
Neurof_GoNervSysDev__LOSS	0.0264812	0.911075	0.913636	0.0392268	0.414673	0.312257	0.330368	0.481002	0.271706	0.489744	0.502566	0.298807	0.202943	0.607916	0.617417	0.209421	3.68664	3.2386	0	0.198282	0	0.0660939	0	0.0660939	0	0.0660939	0	1.38249	2.30415	0.132188	0.991408	2.115	3.36134	3.11615	4.08163	3.34572	1.96078	3.69004	4.21687	2.71429	217	1513	0.849831	0.960126	KLn	LOSS	CDS	min25k.min10pr
HI_q3__LOSS	-0.0466462	0.775857	0.754734	-0.122206	0.232755	0.353324	0.358483	0.445531	0.0489	0.818597	0.819648	0.0863729	0.0330646	0.877827	0.878383	0.056316	9.67742	9.38533	1.84332	1.38797	0	0.132188	0	0.0660939	0	0.0660939	0.460829	3.22581	5.99078	0.793126	3.30469	5.28751	10.084	9.34844	9.18367	9.4176	5.88235	7.87208	10.8434	11.1429	217	1513	0.849831	0.960126	KLn	LOSS	CDS	min25k.min10pr
GOP_lessthan500g__LOSS	-0.104803	0.245281	0.203112	-0.692264	0.211011	0.39555	0.385913	0.413511	-0.0750474	0.43351	0.420568	-0.376164	-0.0884846	0.370032	0.354597	-0.450265	24.8848	25.3139	6.91244	8.85658	3.22581	3.1725	0.921659	1.58625	0	1.18969	0.921659	7.37327	16.5899	1.18969	8.79048	15.3338	26.8908	27.4788	22.449	23.4201	25.4902	23.0012	24.6988	28	217	1513	0.849831	0.960126	KLn	LOSS	CDS	min25k.min10pr
Neurof_GoNeuronBody__LOSS	0.579212	0.610367	0.630405	0.200381	1.12346	0.358132	0.398293	0.399798	0.789423	0.500866	0.529956	0.27576	0.740932	0.526849	0.553161	0.257149	0.460829	0.330469	0	0	0	0	0	0	0	0	0	0	0.460829	0.0660939	0.0660939	0.198282	0	0.424929	1.02041	0.247831	0	0.492005	0.60241	0.142857	217	1513	0.849831	0.960126	KLn	LOSS	CDS	min25k.min10pr
Neurof_GoNeuronProj__LOSS	-0.00850332	0.979709	0.979534	-0.00898064	0.506904	0.377725	0.400288	0.397627	0.271723	0.613815	0.625744	0.203603	0.224281	0.674549	0.684639	0.164538	1.84332	1.71844	0	0.198282	0	0.0660939	0	0.0660939	0	0.0660939	0	0.921659	0.921659	0.198282	0.462657	1.0575	1.68067	1.27479	2.04082	2.10657	3.92157	1.84502	1.20482	1.57143	217	1513	0.849831	0.960126	KLn	LOSS	CDS	min25k.min10pr
Neurof_GoSynaptic__LOSS	0.1257	0.808224	0.814723	0.08899	0.578751	0.383929	0.40973	0.387502	0.341756	0.591377	0.605591	0.217821	0.297003	0.64338	0.654224	0.184273	1.38249	0.925314	0	0.132188	0	0.0660939	0	0.0660939	0	0	0	0.921659	0.460829	0.0660939	0.198282	0.660939	0.840336	1.13314	2.04082	0.743494	1.96078	0.738007	1.20482	1.14286	217	1513	0.849831	0.960126	KLn	LOSS	CDS	min25k.min10pr
Neurof_KeggSynaptic__LOSS	0.157737	0.787367	0.797866	0.0980699	0.674233	0.411968	0.44013	0.356419	0.556918	0.494335	0.516348	0.287058	0.514583	0.529214	0.548711	0.260656	0.921659	0.660939	0	0.0660939	0	0.0660939	0	0.0660939	0	0	0	0	0.921659	0.0660939	0.132188	0.462657	0	0.849858	2.04082	0.495663	0	0.861009	1.20482	0.428571	217	1513	0.849831	0.960126	KLn	LOSS	CDS	min25k.min10pr
BspanVHM_PstNat__LOSS	-0.0471414	0.825558	0.813273	-0.0897634	0.249478	0.430457	0.440719	0.355839	0.0429203	0.879229	0.880011	0.0555119	0.0270513	0.924665	0.924994	0.0338613	5.52995	5.3536	0.460829	0.85922	0	0.198282	0	0.0660939	0	0.0660939	0	1.84332	3.68664	0.198282	1.91672	3.2386	5.04202	5.94901	6.12245	4.83271	9.80392	5.04305	4.21687	5.71429	217	1513	0.849831	0.960126	KLn	LOSS	CDS	min25k.min10pr
PhMm_Aggr_HematoImmune_all__LOSS	-0.0330791	0.881006	0.875572	-0.0577083	0.246114	0.456335	0.466574	0.33108	0.072618	0.813112	0.814832	0.0889318	0.0646565	0.83378	0.835262	0.0781775	5.06912	4.62657	0.460829	0.264375	0	0.132188	0	0.0660939	0	0.0660939	0	0	5.06912	0.198282	1.91672	2.51157	5.04202	4.24929	5.10204	4.95663	3.92157	3.81304	5.42169	5.57143	217	1513	0.849831	0.960126	KLn	LOSS	CDS	min25k.min10pr
Neurof_UnionStringent__LOSS	-0.0434208	0.900547	0.89561	-0.047881	0.361309	0.514502	0.531069	0.274849	0.155638	0.768199	0.77293	0.11186	0.094614	0.858457	0.860451	0.0652736	1.84332	1.78453	0	0.264375	0	0.0660939	0	0.0660939	0	0.0660939	0	0.921659	0.921659	0.132188	0.528751	1.1236	1.68067	1.41643	2.04082	2.10657	3.92157	1.84502	1.20482	1.71429	217	1513	0.887708	0.960126	KLn	LOSS	CDS	min25k.min10pr
PSD_BayesGrant_fullset__LOSS	-0.032011	0.927855	0.926807	-0.0330105	0.265424	0.549591	0.561799	0.250419	0.0794957	0.848743	0.850637	0.070256	0.0479976	0.909119	0.909806	0.0410512	2.76498	2.31328	0	0.264375	0	0.198282	0	0.0660939	0	0.0660939	0	0.921659	1.84332	0.132188	0.793126	1.38797	0.840336	1.983	5.10204	2.60223	1.96078	1.96802	3.01205	2.71429	217	1513	0.887708	0.960126	KLn	LOSS	CDS	min25k.min10pr
PhHs_MindFun_All__LOSS	0.00846215	0.985889	0.985904	0.00616537	0.25849	0.608167	0.617631	0.209271	0.0976842	0.842107	0.843844	0.073738	0.0548099	0.911518	0.912062	0.0399759	2.30415	2.24719	0	0.132188	0	0	0	0	0	0	0	0.460829	1.84332	0.132188	0.594845	1.52016	0.840336	1.55807	4.08163	2.85006	0	2.21402	3.01205	2.28571	217	1513	0.887708	0.960126	KLn	LOSS	CDS	min25k.min10pr
SynKEGG_Serotonergic__LOSS	0.352453	0.749211	0.758596	0.11999	0.575408	0.609388	0.630173	0.20054	0.471667	0.674288	0.689098	0.161719	0.487731	0.664577	0.680158	0.16739	0.460829	0.462657	0	0	0	0	0	0	0	0	0	0	0.460829	0.0660939	0.0660939	0.330469	0	0.566572	1.02041	0.371747	0	0.738007	0.60241	0.142857	217	1513	0.887708	0.960126	KLn	LOSS	CDS	min25k.min10pr
HI_q2__LOSS	-0.1529	0.47139	0.423262	-0.37339	0.131625	0.641927	0.644024	0.191098	-0.0917674	0.681091	0.677343	-0.169192	-0.105134	0.64221	0.637699	-0.195384	9.67742	9.31923	0.460829	1.38797	0	0.198282	0	0.0660939	0	0.0660939	0	2.76498	6.91244	0.528751	3.56907	5.22141	10.084	11.1898	9.18367	7.68278	9.80392	7.99508	9.63855	10.8571	217	1513	0.887708	0.960126	KLn	LOSS	CDS	min25k.min10pr
BspanHM_lg2rpkm3.21__LOSS	-0.104466	0.593244	0.543159	-0.265073	0.100668	0.680619	0.683232	0.165432	-0.0432933	0.838465	0.837236	-0.0771519	-0.0410686	0.848249	0.847147	-0.0720412	7.8341	8.65829	1.84332	1.38797	0	0.396563	0	0.132188	0	0.0660939	0	3.22581	4.60829	0.660939	2.97422	5.02313	7.56303	9.2068	8.16327	8.17844	9.80392	7.62608	7.22892	9.85714	217	1513	0.892089	0.960126	KLn	LOSS	CDS	min25k.min10pr
GI_q1__LOSS	-0.117396	0.432083	0.403088	-0.3946	0.0774706	0.697078	0.699677	0.155102	-0.0781525	0.612827	0.602102	-0.22033	-0.085209	0.582055	0.569305	-0.244655	13.8249	12.2274	0.921659	2.57766	0	0.793126	0	0.594845	0	0.264375	0.921659	1.84332	11.0599	0.85922	3.63516	7.73298	15.9664	13.3144	11.2245	11.2763	5.88235	11.5621	16.2651	13	217	1513	0.892089	0.960126	KLn	LOSS	CDS	min25k.min10pr
BspanVHM_EqlNat__LOSS	-0.138169	0.649999	0.590773	-0.22858	0.123474	0.737935	0.740583	0.130426	-0.0485655	0.885543	0.884822	-0.053144	-0.0602116	0.859602	0.858529	-0.0662451	4.60829	4.82485	0	0.396563	0	0.132188	0	0.0660939	0	0.0660939	0	1.38249	3.22581	0.462657	1.85063	2.51157	5.04202	4.53258	4.08163	5.08055	3.92157	4.42804	4.81928	5.28571	217	1513	0.906018	0.960126	KLn	LOSS	CDS	min25k.min10pr
FMR1_Targets_Ascano__LOSS	-0.146931	0.767707	0.758712	-0.119923	0.157922	0.78166	0.784909	0.105181	-0.0113945	0.983566	0.983545	-0.00720556	0.00518827	0.992519	0.992523	0.00325927	1.84332	2.115	0	0.0660939	0	0.0660939	0	0.0660939	0	0.0660939	0	0	1.84332	0.264375	0.793126	1.0575	0.840336	2.40793	3.06122	1.85874	1.96078	2.21402	1.80723	2	217	1513	0.906018	0.998255	KLn	LOSS	CDS	min25k.min10pr
Neurof_GoNervSysDev_CNS__LOSS	-0.0917622	0.86036	0.858364	-0.0663285	0.137257	0.806667	0.809333	0.0918726	0.0246678	0.964279	0.964376	0.0157534	-0.0503843	0.927666	0.927276	-0.0327909	1.84332	2.1811	0	0.0660939	0	0.0660939	0	0	0	0	0	0.460829	1.38249	0.0660939	0.727032	1.38797	2.52101	2.40793	1.02041	1.98265	1.96078	2.58303	1.80723	1.71429	217	1513	0.906018	0.998255	KLn	LOSS	CDS	min25k.min10pr
PhMm_Aggr_DigestHepato_all__LOSS	-0.131755	0.686157	0.657606	-0.182034	0.0912728	0.815317	0.817193	0.0876756	-0.0675445	0.854833	0.853417	-0.0688388	-0.0653072	0.859713	0.858388	-0.0663164	3.68664	3.76735	0	0.198282	0	0.132188	0	0.0660939	0	0.0660939	0	0.460829	3.22581	0.330469	1.0575	2.37938	3.36134	3.68272	4.08163	3.84139	7.84314	3.19803	2.40964	4.42857	217	1513	0.906018	0.960126	KLn	LOSS	CDS	min25k.min10pr
PhMm_Aggr_Sensory_all__LOSS	-0.18374	0.618394	0.598418	-0.222995	0.0826432	0.84379	0.845112	0.0730855	-0.115918	0.768094	0.764579	-0.116578	-0.127978	0.745901	0.741752	-0.129741	3.22581	3.43688	0	0.264375	0	0.0660939	0	0.0660939	0	0.0660939	0	0.460829	2.76498	0.132188	1.45406	1.85063	4.20168	3.54108	2.04082	3.34572	3.92157	3.19803	3.01205	3.71429	217	1513	0.917037	0.960126	KLn	LOSS	CDS	min25k.min10pr
BspanVH_lg2rpkm4.74__LOSS	-0.19651	0.519322	0.446296	-0.350377	0.0350369	0.91861	0.919013	0.0366786	-0.145341	0.639414	0.628594	-0.20163	-0.158328	0.612746	0.599876	-0.221939	4.60829	5.15532	0	0.660939	0	0.198282	0	0.198282	0	0.132188	0	2.30415	2.30415	0.462657	2.04891	2.64375	4.20168	6.09065	5.10204	4.33705	7.84314	5.28905	3.61446	5	217	1513	0.969682	0.960126	KLn	LOSS	CDS	min25k.min10pr
PhMm_Aggr_SkeCranioLimbs_all__LOSS	-0.211677	0.605503	0.585337	-0.232594	0.0314777	0.945185	0.94537	0.0243983	-0.112486	0.796557	0.793713	-0.100337	-0.173809	0.693198	0.686916	-0.163096	2.76498	3.56907	0	0.198282	0	0.0660939	0	0.0660939	0	0.0660939	0	0.460829	2.30415	0.0660939	1.25578	2.24719	4.20168	3.25779	1.02041	3.84139	3.92157	3.93604	2.40964	3.14286	217	1513	0.969682	0.960126	KLn	LOSS	CDS	min25k.min10pr
SynKEGG_GABAergic__LOSS	-9.96567	0.975519	0.705211	-0.151681	3.2487	0.992021	1	0	-0.522408	0.998717	0.998255	-0.000758589	-3.33639	0.991803	0.98903	-0.00479068	0	0.0660939	0	0	0	0	0	0	0	0	0	0	0	0.0660939	0	0	0	0.141643	0	0	0	0.123001	0	0	217	1513	1	0.998255	KLn	LOSS	CDS	min25k.min10pr
GI_q4__LOSS	-0.194889	0.402403	0.353497	-0.451614	-0.0166111	0.950728	0.950668	-0.0219711	-0.14264	0.551843	0.542711	-0.265432	-0.151075	0.530727	0.520855	-0.283283	6.91244	8.92267	1.38249	1.38797	0	0.132188	0	0.132188	0	0.132188	0.460829	2.30415	4.14747	0.528751	3.76735	4.62657	7.56303	8.92351	6.12245	8.92193	7.84314	8.48708	6.62651	9.42857	217	1513	0.969682	0.960126	KLn	LOSS	CDS	min25k.min10pr
Kirov_ARC__LOSS	-9.62079	0.976365	0.748936	-0.125555	-9.43193	0.976829	0.770436	-0.113263	-9.61737	0.976374	0.74934	-0.125321	-9.65513	0.976281	0.744858	-0.127927	0	0.0660939	0	0	0	0	0	0	0	0	0	0	0	0	0	0.0660939	0	0	0	0.123916	0	0.123001	0	0	217	1513	0.906018	0.960126	KLn	LOSS	CDS	min25k.min10pr
HI_q1__LOSS	-0.229021	0.221399	0.178023	-0.749524	-0.0724028	0.760003	0.758175	-0.120231	-0.193742	0.306737	0.278034	-0.555902	-0.194177	0.304139	0.274645	-0.561228	8.75576	10.1785	0.921659	3.04032	0	0.925314	0	0.396563	0	0.132188	0.460829	1.84332	6.45161	0.528751	3.2386	6.4111	9.2437	9.91501	8.16327	10.4089	7.84314	10.8241	9.03614	9.42857	217	1513	0.906018	0.960126	KLn	LOSS	CDS	min25k.min10pr
GI_q3__LOSS	-0.286491	0.279912	0.22989	-0.638481	-0.121609	0.681225	0.677063	-0.169371	-0.247537	0.354025	0.332167	-0.478644	-0.237661	0.378229	0.358089	-0.446009	5.06912	7.33642	0.921659	1.32188	0	0.264375	0	0.0660939	0	0.0660939	0	2.30415	2.76498	0.462657	2.57766	4.2961	5.88235	7.50708	4.08163	7.18711	11.7647	7.25707	3.01205	7.42857	217	1513	0.892089	0.960126	KLn	LOSS	CDS	min25k.min10pr
BspanVHM_PreNat__LOSS	-0.355846	0.306124	0.251934	-0.598713	-0.171229	0.650365	0.643859	-0.191209	-0.299364	0.39968	0.376685	-0.424022	-0.279959	0.433954	0.412665	-0.384402	3.68664	4.42829	0	0.594845	0	0.132188	0	0.132188	0	0.0660939	0	2.30415	1.38249	0.396563	1.52016	2.51157	3.36134	4.95751	4.08163	3.9653	3.92157	3.81304	3.61446	5.14286	217	1513	0.887708	0.960126	KLn	LOSS	CDS	min25k.min10pr
SynKEGG_Glutamatergic__LOSS	-10.9345	0.978344	0.532766	-0.273464	-11.3707	0.982494	0.631235	-0.199809	-10.4936	0.975096	0.633022	-0.198581	-10.4069	0.97584	0.65402	-0.184409	0	0.198282	0	0.0660939	0	0	0	0	0	0	0	0	0	0.0660939	0.0660939	0.0660939	0	0.283286	0	0.123916	0	0.369004	0	0	217	1513	0.887708	0.960126	KLn	LOSS	CDS	min25k.min10pr
SynKEGG_Dopaminergic__LOSS	-10.9345	0.978344	0.532766	-0.273464	-11.3707	0.982494	0.631235	-0.199809	-10.4936	0.975096	0.633022	-0.198581	-10.4069	0.97584	0.65402	-0.184409	0	0.198282	0	0.0660939	0	0	0	0	0	0	0	0	0	0.0660939	0.0660939	0.0660939	0	0.283286	0	0.123916	0	0.369004	0	0	217	1513	0.887708	0.960126	KLn	LOSS	CDS	min25k.min10pr
PhHs_NervSys_ADX__LOSS	-0.73278	0.464675	0.40728	-0.390107	-0.517589	0.604947	0.572653	-0.242108	-0.62757	0.53178	0.487126	-0.312359	-0.688742	0.493982	0.442796	-0.353796	0.460829	0.85922	0	0.0660939	0	0	0	0	0	0	0	0	0.460829	0.132188	0.396563	0.330469	0	0.566572	1.02041	1.11524	0	0.615006	0.60241	1.14286	217	1513	0.887708	0.960126	KLn	LOSS	CDS	min25k.min10pr
Kirov_NMDAR__LOSS	-11.6465	0.974091	0.385494	-0.413982	-12.1446	0.979758	0.452235	-0.344636	-12.3214	0.98055	0.438067	-0.35846	-12.2743	0.980422	0.444727	-0.351907	0	0.264375	0	0.0660939	0	0	0	0	0	0	0	0	0	0.0660939	0.0660939	0.132188	0	0.283286	0	0.247831	0	0.369004	0	0.142857	217	1513	0.849831	0.960126	KLn	LOSS	CDS	min25k.min10pr
SynKEGG_Cholinergic__LOSS	-11.8351	0.973187	0.346581	-0.460195	-12.1596	0.979729	0.449412	-0.347355	-12.4573	0.980164	0.40679	-0.39063	-12.4144	0.97995	0.411305	-0.385836	0	0.264375	0	0.0660939	0	0	0	0	0	0	0	0	0	0.0660939	0.132188	0.0660939	0	0.424929	0	0.123916	0	0.369004	0	0.142857	217	1513	0.849831	0.960126	KLn	LOSS	CDS	min25k.min10pr
GI_q2__LOSS	-0.418355	0.125207	0.093667	-1.02841	-0.271536	0.390197	0.380346	-0.419822	-0.372538	0.181637	0.160294	-0.795084	-0.385753	0.170495	0.148817	-0.827347	5.06912	8.52611	1.38249	1.0575	0	0.0660939	0	0.0660939	0	0.0660939	0	1.38249	3.68664	0.594845	3.70126	4.23001	6.72269	10.3399	3.06122	6.93928	5.88235	7.62608	4.81928	9.57143	217	1513	0.849831	0.960126	KLn	LOSS	CDS	min25k.min10pr
PhMm_Aggr_CardvascMuscle_all__LOSS	-0.475084	0.185595	0.140642	-0.851886	-0.328286	0.389456	0.371582	-0.429945	-0.429307	0.236798	0.207394	-0.683204	-0.447063	0.219984	0.190388	-0.72036	3.22581	5.15532	0.460829	0.528751	0	0.0660939	0	0.0660939	0	0.0660939	0	0.921659	2.30415	0.396563	1.91672	2.84204	4.20168	4.95751	2.04082	5.32838	3.92157	4.30504	3.01205	6.14286	217	1513	0.849831	0.960126	KLn	LOSS	CDS	min25k.min10pr
PhHs_MindFun_ADX__LOSS	-12.7633	0.976635	0.26597	-0.575167	-12.1597	0.973439	0.325724	-0.48715	-12.365	0.974115	0.298701	-0.524763	-12.3851	0.973734	0.288518	-0.539827	0	0.264375	0	0	0	0	0	0	0	0	0	0	0	0.0660939	0.0660939	0.132188	0	0.141643	0	0.371747	0	0.123001	0	0.428571	217	1513	0.849831	0.960126	KLn	LOSS	CDS	min25k.min10pr
BspanML_lg2rpkm0.93__LOSS	-0.350234	0.0749088	0.05152	-1.28802	-0.266978	0.239449	0.228514	-0.641087	-0.317648	0.112816	0.0925514	-1.03362	-0.316079	0.117807	0.0974037	-1.01142	8.75576	13.1527	1.38249	2.90813	0.460829	0.528751	0.460829	0.132188	0	0.0660939	0.460829	1.84332	6.45161	0.727032	4.75876	7.66689	10.9244	13.881	6.12245	12.5155	3.92157	12.5461	10.241	13.8571	217	1513	0.849831	0.960126	KLn	LOSS	CDS	min25k.min10pr
Neurof_PathwaysAxonG__LOSS	-13.0361	0.9719	0.122805	-0.910785	-12.6252	0.96942	0.171027	-0.766936	-12.7936	0.97031	0.153298	-0.814463	-12.8205	0.969738	0.142026	-0.847632	0	0.660939	0	0.0660939	0	0.0660939	0	0	0	0	0	0	0	0.132188	0.264375	0.264375	0	0.424929	0	0.86741	0	0.738007	0	0.571429	217	1513	0.815489	0.960126	KLn	LOSS	CDS	min25k.min10pr
HI_q4__LOSS	-0.857378	0.0408724	0.0177362	-1.75114	-0.747909	0.0866701	0.0595508	-1.22511	-0.805565	0.0581421	0.0329786	-1.48177	-0.848459	0.0468771	0.0247705	-1.60606	2.76498	6.01454	0	0.462657	0	0.132188	0	0.0660939	0	0.0660939	0	0.921659	1.84332	0.396563	2.24719	3.37079	1.68067	6.65722	4.08163	5.45229	3.92157	5.41205	2.40964	6.71429	217	1513	0.709398	0.960126	KLn	LOSS	CDS	min25k.min10pr
FMR1_Targets_Darnell__GAIN	0.469004	0.0317912	0.0399155	1.39886	0.509206	0.0279574	0.0341459	1.46666	0.446591	0.0433505	0.0523337	1.28122	0.463063	0.0399501	0.0482445	1.31655	9.67742	6.27892	2.30415	0.330469	0	0	0	0	0	0	1.84332	4.14747	3.68664	0.991408	3.1725	2.115	10.9244	6.51558	8.16327	6.07187	5.88235	5.53506	10.8434	7.14286	217	1513	0.575182	0.697897	KLn	GAIN	CDS	min25k.min10pr
BspanVHM_PstNat__GAIN	0.187436	0.0966738	0.110594	0.956268	0.260281	0.0634183	0.0676685	1.16961	0.169353	0.150742	0.164211	0.784597	0.189375	0.117658	0.129438	0.887939	16.5899	14.0119	4.14747	3.89954	1.84332	1.0575	1.84332	0.198282	1.38249	0.0660939	3.68664	7.8341	5.06912	2.04891	6.4772	5.48579	20.1681	13.0312	12.2449	14.8699	17.6471	13.0381	16.2651	15.1429	217	1513	0.575182	0.697897	KLn	GAIN	CDS	min25k.min10pr
Kirov_ARC__GAIN	1.64266	0.0840834	0.110697	0.955866	1.64058	0.0846966	0.111287	0.953555	1.5857	0.0982148	0.124497	0.904842	1.55552	0.107291	0.133675	0.873949	0.921659	0.198282	0	0	0	0	0	0	0	0	0	0	0.921659	0.0660939	0.0660939	0.0660939	0	0.141643	2.04082	0.247831	0	0.246002	1.20482	0.142857	217	1513	0.646984	0.697897	KLn	GAIN	CDS	min25k.min10pr
Neurof_UnionStringent__GAIN	0.277533	0.144375	0.163499	0.786485	0.30309	0.136836	0.151724	0.818947	0.247596	0.203445	0.220408	0.656772	0.274854	0.170871	0.18687	0.728461	10.1382	7.13814	1.38249	1.0575	0.460829	0.198282	0	0.132188	0	0	1.84332	4.14747	4.14747	1.1236	3.2386	2.77594	10.9244	5.94901	9.18367	8.17844	7.84314	6.76507	10.8434	7.57143	217	1513	0.646984	0.749389	KLn	GAIN	CDS	min25k.min10pr
FMR1_Targets_Ascano__GAIN	0.281376	0.183875	0.199839	0.699319	0.310474	0.172246	0.185383	0.731929	0.248796	0.250235	0.264148	0.578153	0.277365	0.209317	0.223398	0.650921	8.75576	7.5347	1.84332	0.528751	0.460829	0.132188	0	0	0	0	1.38249	5.06912	2.30415	1.1236	3.89954	2.51157	9.2437	6.79887	8.16327	8.17844	9.80392	7.62608	8.43373	7.42857	217	1513	0.646984	0.792444	KLn	GAIN	CDS	min25k.min10pr
Neurof_GoNeuronProj__GAIN	0.269707	0.177035	0.196687	0.706225	0.289953	0.171969	0.187493	0.727015	0.241944	0.232175	0.249644	0.602678	0.276457	0.187535	0.203931	0.690518	10.5991	7.46861	0.460829	0.793126	0.460829	0.198282	0	0.132188	0	0	1.84332	4.14747	4.60829	0.925314	3.04032	3.50297	10.9244	6.23229	10.2041	8.55019	7.84314	7.25707	11.4458	7.71429	217	1513	0.646984	0.792444	KLn	GAIN	CDS	min25k.min10pr
Neurof_GoNervSysDev__GAIN	0.194173	0.235399	0.254616	0.594115	0.224264	0.220825	0.232373	0.633815	0.160851	0.343695	0.35651	0.447928	0.193726	0.270468	0.284501	0.545917	12.4424	10.5089	2.30415	1.71844	0.460829	0.462657	0	0.132188	0	0.132188	2.76498	5.99078	3.68664	1.71844	5.15532	3.63516	15.1261	8.2153	9.18367	12.5155	15.6863	10.7011	11.4458	10.2857	217	1513	0.658389	0.935931	KLn	GAIN	CDS	min25k.min10pr
BspanVH_lg2rpkm4.74__GAIN	0.0928221	0.366834	0.37881	0.421579	0.127664	0.317972	0.322485	0.491491	0.0729024	0.492786	0.500515	0.300583	0.0889125	0.413359	0.422592	0.374079	17.9724	16.2591	5.52995	4.89095	2.76498	1.71844	0.921659	0.727032	0.460829	0.198282	2.76498	7.37327	7.8341	1.52016	9.05486	5.68407	20.1681	15.4391	15.3061	16.9765	21.5686	16.2362	16.8675	16.2857	217	1513	0.803302	0.935931	KLn	GAIN	CDS	min25k.min10pr
Neurof_UnionInclusive__GAIN	0.121362	0.345191	0.359306	0.444535	0.14588	0.323143	0.330682	0.480589	0.0910026	0.498962	0.506014	0.295838	0.119432	0.391467	0.400997	0.396858	18.894	15.8625	4.14747	3.50297	0.460829	0.85922	0	0.198282	0	0.132188	3.68664	7.8341	7.37327	2.37938	7.60079	5.88235	21.8487	13.1728	15.3061	18.2156	19.6078	15.4982	18.6747	16.2857	217	1513	0.803302	0.935931	KLn	GAIN	CDS	min25k.min10pr
GI_q4__GAIN	0.0864327	0.362786	0.374971	0.426002	0.112064	0.324624	0.330771	0.480472	0.0654949	0.50957	0.516656	0.286799	0.0907808	0.390049	0.39875	0.399299	23.5023	21.6788	7.37327	6.08063	2.76498	1.71844	1.38249	0.660939	0.460829	0.264375	2.76498	11.9816	8.75576	2.44547	10.1124	9.12095	24.3697	17.1388	22.449	25.6506	23.5294	20.0492	23.494	23.5714	217	1513	0.803302	0.935931	KLn	GAIN	CDS	min25k.min10pr
PhHs_NervSys_ADX__GAIN	0.238832	0.349345	0.37147	0.430076	0.260811	0.3471	0.362484	0.440711	0.193129	0.456293	0.470892	0.327079	0.236009	0.37362	0.391901	0.406823	5.99078	4.69266	0.921659	0.198282	0	0.132188	0	0.132188	0	0	0.921659	4.14747	0.921659	0.462657	2.31328	1.91672	8.40336	3.96601	3.06122	5.32838	1.96078	4.55105	7.22892	4.85714	217	1513	0.804152	0.935931	KLn	GAIN	CDS	min25k.min10pr
HI_q2__GAIN	0.0743077	0.460349	0.468477	0.329312	0.131925	0.357387	0.362657	0.440504	0.0427654	0.698518	0.701062	0.154244	0.0763097	0.499037	0.504665	0.296997	23.5023	22.2736	5.52995	6.34501	2.30415	1.98282	1.84332	0.462657	0.460829	0.132188	5.52995	9.67742	8.29493	3.2386	9.98017	9.05486	23.5294	19.9717	23.4694	24.2875	23.5294	21.8942	23.494	22.7143	217	1513	0.804152	0.935931	KLn	GAIN	CDS	min25k.min10pr
Kirov_NMDAR__GAIN	0.722278	0.385433	0.413978	0.383023	0.720633	0.386564	0.415007	0.381945	0.677774	0.415774	0.441846	0.354729	0.695928	0.402779	0.429965	0.366567	0.921659	0.396563	0	0	0	0	0	0	0	0	0	0	0.921659	0.0660939	0.198282	0.132188	0	0.283286	2.04082	0.495663	0	0.246002	1.20482	0.571429	217	1513	0.846614	0.935931	KLn	GAIN	CDS	min25k.min10pr
GI_q1__GAIN	0.0361762	0.517265	0.533311	0.273019	0.0602185	0.443207	0.453317	0.343598	0.024337	0.677761	0.685393	0.16406	0.0364894	0.537217	0.55203	0.258037	23.5023	22.2075	6.91244	7.73298	2.76498	3.04032	2.30415	1.65235	1.84332	0.727032	3.22581	11.0599	9.21659	2.97422	10.575	8.65829	25.2101	21.3881	21.4286	22.9244	17.6471	22.1402	25.3012	22.2857	217	1513	0.854261	0.935931	KLn	GAIN	CDS	min25k.min10pr
Neurof_GoSynaptic__GAIN	0.241373	0.454522	0.467301	0.330404	0.244052	0.459951	0.471931	0.326122	0.196945	0.547765	0.556714	0.254368	0.210957	0.524253	0.533889	0.272549	4.60829	3.50297	0.460829	0.264375	0	0	0	0	0	0	1.38249	0.921659	2.30415	0.462657	1.65235	1.38797	5.04202	3.25779	4.08163	3.71747	3.92157	3.19803	4.81928	3.85714	217	1513	0.854261	0.935931	KLn	GAIN	CDS	min25k.min10pr
Neurof_GoNervTransm__GAIN	0.183996	0.51927	0.528078	0.277302	0.186749	0.525994	0.533778	0.272639	0.136061	0.64006	0.644873	0.190526	0.141367	0.63082	0.635534	0.196861	6.45161	4.42829	0	0.396563	0	0	0	0	0	0	1.38249	1.38249	3.68664	0.925314	1.98282	1.52016	6.72269	3.68272	6.12245	5.08055	7.84314	3.44403	6.0241	5.57143	217	1513	0.878151	0.935931	KLn	GAIN	CDS	min25k.min10pr
HI_q1__GAIN	0.0312354	0.607294	0.617988	0.20902	0.0504431	0.555527	0.561252	0.250842	0.0177397	0.780471	0.783977	0.105697	0.0291545	0.653448	0.661909	0.179202	20.7373	21.3483	5.52995	7.13814	3.22581	2.90813	2.30415	1.18969	1.38249	0.660939	4.14747	9.21659	7.37327	2.84204	9.98017	8.52611	21.8487	19.6884	19.3878	22.8005	9.80392	21.4022	24.0964	21.2857	217	1513	0.889262	0.95136	KLn	GAIN	CDS	min25k.min10pr
PSD_BayesGrant_fullset__GAIN	0.0999852	0.616214	0.621468	0.206581	0.107025	0.621541	0.625396	0.203845	0.0712409	0.724786	0.727478	0.13818	0.0919629	0.654578	0.658524	0.181429	10.1382	9.45142	1.38249	0.991408	0.460829	0.132188	0	0.0660939	0	0	1.84332	4.14747	4.14747	1.1236	4.23001	4.09782	9.2437	9.06516	11.2245	9.78934	7.84314	9.34809	10.8434	9.57143	217	1513	0.889262	0.935931	KLn	GAIN	CDS	min25k.min10pr
PhMm_CompleteLethality__GAIN	0.163505	0.613111	0.620249	0.207434	0.164797	0.62309	0.629029	0.201329	0.112473	0.730749	0.734063	0.134267	0.13592	0.680278	0.684785	0.164446	4.60829	4.2961	0.460829	0.264375	0	0	0	0	0	0	1.38249	1.84332	1.38249	0.925314	2.115	1.25578	7.56303	3.25779	1.02041	5.20446	7.84314	4.18204	3.61446	4.42857	217	1513	0.889262	0.935931	KLn	GAIN	CDS	min25k.min10pr
BspanLA_lg2rpkm.MIN__GAIN	0.0163869	0.695822	0.701732	0.153829	0.03198	0.637217	0.638947	0.194535	-0.00710836	0.890197	0.889352	-0.0509262	0.0122796	0.794944	0.797668	0.0981777	21.659	25.2479	12.4424	10.575	5.99078	4.82485	4.14747	3.2386	3.22581	2.04891	3.22581	12.4424	5.99078	3.76735	11.0377	10.4428	21.8487	21.5297	21.4286	28.5006	15.6863	24.3542	23.494	26.2857	217	1513	0.889262	0.95136	KLn	GAIN	CDS	min25k.min10pr
PhMm_NervSystem_all__GAIN	0.051794	0.726206	0.728945	0.137305	0.0563731	0.737622	0.739005	0.131353	0.00944243	0.951288	0.95136	0.0216552	0.027212	0.864881	0.865415	0.0627758	14.2857	13.5492	3.22581	3.1725	0.460829	0.462657	0	0.198282	0	0.132188	2.30415	7.8341	4.14747	2.115	5.81626	5.61798	16.8067	11.898	11.2245	14.9938	17.6471	13.8991	13.253	13.1429	217	1513	0.889262	0.95136	KLn	GAIN	CDS	min25k.min10pr
PhMm_Aggr_Sensory_all__GAIN	0.0751146	0.728751	0.731646	0.135699	0.0761457	0.743378	0.745439	0.127588	0.0366411	0.867924	0.868578	0.0611909	0.045876	0.838894	0.839824	0.0758117	8.75576	7.60079	0.921659	1.45406	0	0.0660939	0	0	0	0	1.38249	5.06912	2.30415	1.0575	2.70985	3.83344	10.084	6.65722	7.14286	8.42627	9.80392	7.74908	8.43373	7.42857	217	1513	0.889262	0.95136	KLn	GAIN	CDS	min25k.min10pr
Neurof_GoNeuronBody__GAIN	0.160073	0.752438	0.757954	0.120357	0.154517	0.765158	0.769795	0.113625	0.11315	0.82316	0.825934	0.0830546	0.117545	0.817709	0.820503	0.0859196	1.84332	1.58625	0	0.198282	0	0	0	0	0	0	0	0.921659	0.921659	0.264375	0.396563	0.925314	2.52101	1.69972	1.02041	1.48699	1.96078	1.96802	1.80723	1.14286	217	1513	0.889262	0.95136	KLn	GAIN	CDS	min25k.min10pr
PhHs_MindFun_ADX__GAIN	0.228111	0.773526	0.778622	0.108673	0.21916	0.785051	0.78947	0.102665	0.162114	0.838382	0.840972	0.0752182	0.182729	0.81865	0.821883	0.0851902	0.921659	0.727032	0	0	0	0	0	0	0	0	0.460829	0.460829	0	0.198282	0.198282	0.330469	0	0.708215	2.04082	0.743494	0	0.738007	1.20482	0.714286	217	1513	0.889262	0.95136	KLn	GAIN	CDS	min25k.min10pr
GOP_lessthan500g__GAIN	0.00591839	0.855626	0.856519	0.0672632	0.0279438	0.802007	0.801213	0.096252	-0.0144696	0.711657	0.708278	-0.149796	-0.000485346	0.99033	0.990326	-0.00422195	42.8571	46.9266	26.7281	27.1646	17.0507	16.193	10.1382	9.78189	6.91244	6.67548	7.8341	22.1198	12.9032	6.34501	22.538	18.0436	45.3782	43.2011	39.7959	50.1859	35.2941	45.2645	45.1807	48.8571	217	1513	0.889262	0.935931	KLn	GAIN	CDS	min25k.min10pr
GI_q3__GAIN	0.0260727	0.80361	0.805004	0.0942022	0.0313138	0.818761	0.819324	0.0865441	-0.00756146	0.945781	0.945687	-0.0242525	0.0119519	0.916706	0.916931	0.0376632	22.1198	20.6213	7.37327	5.94845	1.38249	1.65235	0	0.660939	0	0.264375	4.14747	12.4424	5.52995	2.97422	10.2445	7.40251	23.5294	19.2635	20.4082	21.8092	21.5686	20.5412	22.2892	20.7143	217	1513	0.889262	0.95136	KLn	GAIN	CDS	min25k.min10pr
BspanHM_lg2rpkm3.21__GAIN	0.0205532	0.827506	0.829117	0.0813842	0.021263	0.852371	0.852952	0.0690755	-0.00906521	0.928169	0.927901	-0.0324984	0.00543843	0.958742	0.95882	0.0182629	21.1982	23.4633	8.29493	6.4772	1.38249	1.78453	0.921659	0.793126	0.921659	0.330469	4.14747	10.5991	6.45161	3.30469	11.1699	8.98876	22.6891	21.813	19.3878	24.9071	17.6471	21.4022	22.2892	25.8571	217	1513	0.889262	0.95136	KLn	GAIN	CDS	min25k.min10pr
PhMm_NeuroUnion_all__GAIN	0.0275452	0.829005	0.830159	0.0808389	0.0272093	0.853988	0.854389	0.0683441	-0.011158	0.933178	0.933034	-0.0301025	0.00786943	0.95468	0.954746	0.0201123	17.0507	17.1183	4.60829	4.36219	1.38249	0.991408	0	0.198282	0	0.132188	2.76498	9.21659	5.06912	2.31328	7.66689	7.13814	17.6471	14.7309	16.3265	19.2069	19.6078	16.9742	16.2651	17.2857	217	1513	0.889262	0.95136	KLn	GAIN	CDS	min25k.min10pr
PhMm_NeuroBehav_all__GAIN	0.0110484	0.947446	0.947593	0.0233781	0.00417659	0.981805	0.981817	0.00796961	-0.0292157	0.864206	0.863344	-0.0638162	-0.0067332	0.96942	0.969377	-0.0135075	11.0599	11.963	3.22581	1.38797	0	0.396563	0	0.198282	0	0.132188	2.30415	4.14747	4.60829	1.32188	5.3536	5.28751	10.9244	10.3399	11.2245	13.3829	13.7255	11.4391	10.241	12.5714	217	1513	0.981817	0.95136	KLn	GAIN	CDS	min25k.min10pr
PhMm_Aggr_CardvascMuscle_all__GAIN	0.000855757	0.995795	0.995796	0.0018297	-0.0086265	0.961804	0.961765	-0.0169309	-0.0446634	0.789682	0.788095	-0.103422	-0.0304255	0.860312	0.859626	-0.0656904	13.3641	12.0291	1.84332	2.90813	0.460829	0.462657	0	0.132188	0	0.0660939	2.76498	6.45161	4.14747	1.91672	5.61798	4.49438	15.1261	10.7649	11.2245	13.1351	13.7255	10.8241	13.253	13.4286	217	1513	0.981001	0.95136	KLn	GAIN	CDS	min25k.min10pr
PhHs_NervSys_All__GAIN	-0.0263698	0.877231	0.876309	-0.0573428	-0.0411689	0.825557	0.824266	-0.0839326	-0.0589593	0.733272	0.729171	-0.137171	-0.0402175	0.820504	0.818786	-0.0868297	9.67742	10.8394	2.30415	1.91672	0.460829	0.330469	0.460829	0.198282	0	0.198282	0.921659	6.91244	1.84332	0.85922	5.48579	4.49438	11.7647	9.77337	7.14286	11.772	3.92157	10.5781	11.4458	11.1429	217	1513	0.889262	0.935931	KLn	GAIN	CDS	min25k.min10pr
Neurof_GoNervSysDev_CNS__GAIN	-0.0567315	0.846757	0.845193	-0.073044	-0.0680013	0.821451	0.819567	-0.0864155	-0.104479	0.724795	0.719986	-0.142676	-0.0832665	0.783758	0.781013	-0.107341	5.06912	5.48579	0.460829	0.528751	0	0.198282	0	0.0660939	0	0	1.38249	2.30415	1.38249	1.0575	2.77594	1.65235	7.56303	4.39093	2.04082	6.44362	3.92157	5.41205	5.42169	5.57143	217	1513	0.889262	0.935931	KLn	GAIN	CDS	min25k.min10pr
BspanVHM_EqlNat__GAIN	-0.0204617	0.885481	0.884765	-0.0531722	-0.0368805	0.820095	0.819018	-0.0867063	-0.0609738	0.67987	0.674826	-0.170808	-0.0455451	0.767246	0.76489	-0.116401	13.8249	14.7389	2.76498	3.43688	0.921659	0.85922	0.460829	0.264375	0.460829	0.0660939	3.68664	5.52995	4.60829	2.1811	7.40251	5.15532	14.2857	13.4561	13.2653	15.8612	11.7647	14.1451	14.4578	15.4286	217	1513	0.889262	0.935931	KLn	GAIN	CDS	min25k.min10pr
BspanVHM_PreNat__GAIN	-0.0323932	0.822209	0.821026	-0.085643	-0.0480713	0.762384	0.761059	-0.118582	-0.0600484	0.682323	0.678787	-0.168266	-0.047136	0.752494	0.750436	-0.124686	13.3641	14.1441	3.22581	3.37079	1.38249	0.85922	0.460829	0.198282	0	0	0.921659	7.37327	5.06912	1.52016	7.40251	5.22141	16.8067	13.4561	9.18367	14.746	11.7647	13.5301	13.8554	14.8571	217	1513	0.889262	0.935931	KLn	GAIN	CDS	min25k.min10pr
HI_q4__GAIN	-0.0374563	0.759555	0.757223	-0.120776	-0.0579477	0.677678	0.675443	-0.170411	-0.0784689	0.538552	0.531357	-0.274614	-0.0597765	0.652899	0.648869	-0.187843	17.9724	19.5638	4.60829	4.62657	1.38249	1.38797	0.921659	0.396563	0.460829	0.132188	3.22581	9.21659	5.52995	2.97422	9.98017	6.60939	20.1681	17.2805	15.3061	21.5613	15.6863	17.5892	18.6747	21.8571	217	1513	0.889262	0.935931	KLn	GAIN	CDS	min25k.min10pr
PhMm_Aggr_SkeCranioLimbs_all__GAIN	-0.0648708	0.731864	0.719834	-0.142768	-0.0842205	0.679933	0.665033	-0.177157	-0.112529	0.566237	0.536543	-0.270396	-0.0976417	0.626679	0.605003	-0.218242	8.75576	10.2445	0.921659	1.32188	0.921659	0.0660939	0	0.0660939	0	0.0660939	1.84332	4.60829	2.30415	1.25578	5.02313	3.96563	10.9244	8.49858	6.12245	11.772	11.7647	10.2091	7.83133	10.2857	217	1513	0.889262	0.935931	KLn	GAIN	CDS	min25k.min10pr
SynKEGG_Glutamatergic__GAIN	-0.626726	0.552788	0.518862	-0.284948	-0.632229	0.549587	0.515302	-0.287939	-0.629044	0.551299	0.517154	-0.28638	-0.616773	0.559198	0.526188	-0.278859	0.460829	0.727032	0	0	0	0	0	0	0	0	0	0	0.460829	0.0660939	0.330469	0.330469	0	0.283286	1.02041	1.11524	0	0.369004	0.60241	1.14286	217	1513	0.876013	0.935931	KLn	GAIN	CDS	min25k.min10pr
SynKEGG_GABAergic__GAIN	-0.66183	0.529145	0.491097	-0.308833	-0.670616	0.524306	0.485756	-0.313582	-0.682235	0.5167	0.47688	-0.321591	-0.688692	0.513304	0.473178	-0.324976	0.460829	0.925314	0	0	0	0	0	0	0	0	0	0.460829	0	0	0.462657	0.462657	0.840336	0.708215	0	1.11524	0	0.98401	0.60241	0.857143	217	1513	0.854261	0.935931	KLn	GAIN	CDS	min25k.min10pr
PhHs_MindFun_All__GAIN	-0.273924	0.484962	0.4678	-0.32994	-0.296599	0.458195	0.441191	-0.355373	-0.31045	0.428876	0.408634	-0.388666	-0.295037	0.454701	0.436376	-0.36014	2.76498	3.96563	0.460829	0.264375	0	0	0	0	0	0	0.460829	1.38249	0.921659	0.396563	1.52016	2.04891	1.68067	4.24929	4.08163	3.71747	1.96078	3.81304	3.01205	4.14286	217	1513	0.854261	0.935931	KLn	GAIN	CDS	min25k.min10pr
Neurof_PathwaysAxonG__GAIN	-0.432815	0.457412	0.424787	-0.371829	-0.447332	0.444684	0.41183	-0.385282	-0.472398	0.418981	0.38263	-0.417221	-0.469193	0.424756	0.389659	-0.409315	1.38249	2.115	0	0.330469	0	0	0	0	0	0	0.460829	0.460829	0.460829	0.462657	0.991408	0.660939	2.52101	1.41643	0	2.72615	1.96078	2.09102	1.20482	2.14286	217	1513	0.846614	0.935931	KLn	GAIN	CDS	min25k.min10pr
PhMm_Aggr_IntegAdipPigm_all__GAIN	-0.212496	0.291699	0.272876	-0.564035	-0.2451	0.248635	0.230614	-0.637114	-0.25951	0.206782	0.186861	-0.728481	-0.256585	0.222001	0.203334	-0.691789	9.21659	10.1785	0.921659	2.64375	0	0.330469	0	0	0	0	3.22581	1.38249	4.60829	1.38797	4.36219	4.42829	9.2437	9.06516	9.18367	11.1524	11.7647	9.34809	8.43373	11.1429	217	1513	0.658389	0.702916	KLn	GAIN	CDS	min25k.min10pr
PhMm_Aggr_EndoExocrRepr_all__GAIN	-0.168932	0.324083	0.307074	-0.512756	-0.227087	0.23546	0.221935	-0.653774	-0.250217	0.171009	0.151784	-0.818773	-0.214492	0.239628	0.221897	-0.653849	12.4424	13.2188	1.84332	2.84204	0	0.462657	0	0.0660939	0	0.0660939	3.22581	4.14747	5.06912	2.1811	5.81626	5.22141	16.8067	11.1898	7.14286	14.9938	9.80392	11.6851	13.253	15	217	1513	0.658389	0.697897	KLn	GAIN	CDS	min25k.min10pr
HI_q3__GAIN	-0.111017	0.345126	0.325838	-0.486999	-0.181423	0.203197	0.19029	-0.720585	-0.150573	0.21516	0.192957	-0.714539	-0.146264	0.24555	0.224532	-0.648723	17.9724	20.8196	4.60829	5.55188	2.30415	1.45406	0.921659	0.660939	0	0.330469	3.22581	9.67742	5.06912	2.97422	10.7072	7.13814	21.8487	18.9802	13.2653	22.4287	13.7255	18.9422	19.2771	23	217	1513	0.646984	0.702916	KLn	GAIN	CDS	min25k.min10pr
PhMm_Aggr_DigestHepato_all__GAIN	-0.263131	0.245564	0.221548	-0.654533	-0.310058	0.196881	0.175824	-0.754922	-0.306552	0.181454	0.157311	-0.803241	-0.303815	0.193662	0.170487	-0.76831	6.91244	10.1124	1.38249	2.04891	0	0.198282	0	0.0660939	0	0	0.460829	4.14747	2.30415	1.58625	4.42829	4.09782	10.084	6.94051	3.06122	12.8872	5.88235	10.5781	7.22892	9.57143	217	1513	0.646984	0.697897	KLn	GAIN	CDS	min25k.min10pr
BspanML_lg2rpkm0.93__GAIN	-0.100959	0.285707	0.268846	-0.570496	-0.170852	0.144647	0.13493	-0.869892	-0.13611	0.165514	0.14859	-0.828011	-0.131106	0.200473	0.183783	-0.735694	24.8848	25.3139	6.45161	8.98876	2.30415	3.56907	0.460829	1.52016	0.460829	0.793126	4.60829	13.3641	6.91244	3.50297	12.6239	9.18705	24.3697	21.3881	25.5102	28.7485	19.6078	23.7392	26.506	27.1429	217	1513	0.646984	0.697897	KLn	GAIN	CDS	min25k.min10pr
Neurof_KeggSynaptic__GAIN	-0.817092	0.172721	0.124034	-0.906458	-0.833598	0.166237	0.118401	-0.926643	-0.841613	0.160879	0.112712	-0.948028	-0.83266	0.165977	0.117906	-0.928465	1.38249	2.51157	0	0.132188	0	0	0	0	0	0	0	0.460829	0.921659	0.132188	1.32188	1.0575	0.840336	1.84136	2.04082	3.09789	0	1.47601	1.80723	3.71429	217	1513	0.646984	0.697897	KLn	GAIN	CDS	min25k.min10pr
PhMm_Aggr_HematoImmune_all__GAIN	-0.233739	0.1534	0.130909	-0.883032	-0.296328	0.0967807	0.0815966	-1.08833	-0.269187	0.104836	0.084673	-1.07226	-0.271261	0.111437	0.0921603	-1.03546	12.9032	14.7389	1.38249	4.36219	0	1.38797	0	0.396563	0	0.132188	2.30415	5.99078	4.60829	1.91672	6.4772	6.34501	12.605	11.4731	13.2653	17.596	13.7255	14.3911	12.6506	15.1429	217	1513	0.59449	0.697897	KLn	GAIN	CDS	min25k.min10pr
SynKEGG_Serotonergic__GAIN	-13.7384	0.974171	0.0648933	-1.1878	-13.7515	0.974142	0.0636677	-1.19608	-13.7504	0.974137	0.0634241	-1.19775	-13.7413	0.974154	0.0645357	-1.1902	0	0.727032	0	0	0	0	0	0	0	0	0	0	0	0	0.462657	0.264375	0	0.566572	0	0.86741	0	0.492005	0	1	217	1513	0.575182	0.697897	KLn	GAIN	CDS	min25k.min10pr
GI_q2__GAIN	-0.166028	0.179481	0.151641	-0.819184	-0.267051	0.0736803	0.0597064	-1.22398	-0.212594	0.0978019	0.0744288	-1.12826	-0.205889	0.115229	0.0914395	-1.03887	11.9816	18.1097	3.22581	5.48579	1.84332	2.115	1.38249	0.925314	0.921659	0.594845	4.14747	5.06912	2.76498	2.37938	10.4428	5.28751	10.9244	17.5637	13.2653	18.5874	11.7647	17.5892	12.0482	18.7143	217	1513	0.575182	0.697897	KLn	GAIN	CDS	min25k.min10pr
SynKEGG_Dopaminergic__GAIN	-13.6379	0.967677	0.0218884	-1.65979	-13.6532	0.967633	0.0212124	-1.67341	-13.6572	0.967575	0.0206155	-1.68581	-13.6382	0.967647	0.0220637	-1.65632	0	1.0575	0	0.0660939	0	0	0	0	0	0	0	0	0	0	0.528751	0.528751	0	0.566572	0	1.48699	0	0.492005	0	1.71429	217	1513	0.540916	0.525695	KLn	GAIN	CDS	min25k.min10pr
SynKEGG_Cholinergic__GAIN	-13.7714	0.966165	0.014284	-1.84515	-13.7931	0.966091	0.013632	-1.86544	-13.7927	0.966084	0.0133808	-1.87352	-13.7816	0.966096	0.0138218	-1.85943	0	1.25578	0	0	0	0	0	0	0	0	0	0	0	0.0660939	0.793126	0.396563	0	0.849858	0	1.6109	0	0.738007	0	1.85714	217	1513	0.540916	0.525695	KLn	GAIN	CDS	min25k.min10pr
FMR1_Targets_Darnell__ALL	0.458201	0.00559708	0.00815653	2.08849	0.587304	0.00278836	0.0037153	2.43001	0.458279	0.008527	0.0115224	1.93846	0.476476	0.00669898	0.00911009	2.04048	13.3929	7.88114	3.125	0.645995	0.446429	0.193798	0	0.129199	0	0.0645995	2.67857	5.35714	5.35714	1.67959	3.81137	2.39018	14.7541	7.93872	11.7647	7.83133	11.3208	7.07434	14.0351	8.82353	224	1548	0.12849	0.195881	KLy	GAIN.LOSS	CDS	min25k.min10pr
Neurof_UnionStringent__ALL	0.191089	0.0666379	0.088005	1.05549	0.337307	0.0333269	0.0363239	1.43981	0.242079	0.106446	0.112603	0.948448	0.226302	0.083695	0.0926727	1.03305	13.3929	9.43152	3.125	1.61499	1.33929	0.516796	0.446429	0.258398	0.446429	0.129199	3.57143	5.35714	4.46429	1.87339	3.74677	3.81137	13.9344	7.66017	12.7451	10.9639	13.2075	9.11271	13.4503	9.80392	224	1548	0.338956	0.687038	KLy	GAIN.LOSS	CDS	min25k.min10pr
Neurof_GoNeuronProj__ALL	0.215638	0.0649292	0.0857198	1.06692	0.363093	0.0346421	0.0388184	1.41096	0.261223	0.106626	0.113788	0.943904	0.239656	0.0858346	0.0965971	1.01504	13.8393	9.62532	2.67857	1.29199	1.33929	0.516796	0	0.258398	0	0.0645995	3.57143	5.35714	4.91071	1.67959	3.48837	4.45736	13.9344	7.93872	13.7255	11.0843	13.2075	9.59233	14.0351	9.66387	224	1548	0.338956	0.687038	KLy	GAIN.LOSS	CDS	min25k.min10pr
Neurof_GoNervSysDev__ALL	0.170414	0.0727276	0.094455	1.02477	0.301394	0.0367437	0.0398772	1.39928	0.211184	0.118986	0.124552	0.90465	0.200966	0.0931104	0.101668	0.992818	17.4107	14.5349	5.35714	3.03618	1.33929	0.968992	0.446429	0.258398	0.446429	0.193798	4.46429	8.03571	4.91071	2.77778	6.45995	5.29716	19.6721	11.8384	14.7059	16.8675	20.7547	15.2278	16.3743	13.7255	224	1548	0.338956	0.687038	KLy	GAIN.LOSS	CDS	min25k.min10pr
Neurof_GoNervTransm__ALL	0.333048	0.0507302	0.0635417	1.19694	0.413523	0.0432152	0.0479199	1.31948	0.356167	0.083411	0.0904208	1.04373	0.372374	0.0617723	0.0684987	1.16432	9.82143	6.26615	1.78571	0.645995	0.446429	0.0645995	0.446429	0.0645995	0.446429	0.0645995	2.67857	3.125	4.01786	1.55039	2.64858	2.06718	9.83607	5.29248	9.80392	7.10843	11.3208	5.03597	9.35673	7.70308	224	1548	0.349131	0.687038	KLy	GAIN.LOSS	CDS	min25k.min10pr
Neurof_UnionInclusive__ALL	0.103903	0.139273	0.17055	0.768149	0.203117	0.0807782	0.0828195	1.08187	0.116092	0.250761	0.255955	0.591836	0.115292	0.189597	0.201802	0.695074	25.4464	21.447	7.58929	5.42636	2.67857	1.67959	0.892857	0.710594	0.446429	0.322997	5.35714	11.1607	8.92857	3.48837	9.75452	8.20413	28.6885	19.0808	21.5686	23.494	28.3019	21.1031	24.5614	21.8487	224	1548	0.46931	0.687038	KLy	GAIN.LOSS	CDS	min25k.min10pr
BspanVHM_PstNat__ALL	0.0912306	0.177712	0.206592	0.684887	0.184169	0.10278	0.105128	0.978284	0.0863372	0.308297	0.320113	0.494697	0.0936613	0.238623	0.253096	0.596714	23.6607	19.3152	7.14286	6.00775	3.125	2.06718	2.23214	0.710594	1.33929	0.581395	4.91071	10.2679	8.48214	3.03618	8.46253	7.81654	26.2295	18.8022	20.5882	19.759	30.1887	18.5851	21.6374	20.1681	224	1548	0.53615	0.742079	KLy	GAIN.LOSS	CDS	min25k.min10pr
Neurof_GoSynaptic__ALL	0.323083	0.127715	0.146959	0.832804	0.374689	0.122371	0.135045	0.869522	0.303755	0.203708	0.217794	0.661954	0.328104	0.162684	0.176479	0.753307	6.25	5.03876	1.78571	0.581395	0.446429	0.129199	0.446429	0.0645995	0	0	1.78571	2.23214	2.23214	0.904393	2.00258	2.13178	6.55738	4.73538	5.88235	5.3012	7.54717	4.79616	5.84795	5.32213	224	1548	0.559088	0.687038	KLy	GAIN.LOSS	CDS	min25k.min10pr
FMR1_Targets_Ascano__ALL	0.249967	0.14909	0.166185	0.779407	0.308086	0.134366	0.144681	0.839587	0.229079	0.231179	0.24235	0.615556	0.245683	0.191211	0.202635	0.693285	12.0536	10.0129	2.23214	0.839793	0.446429	0.258398	0	0.0645995	0	0.0645995	1.78571	5.80357	4.46429	1.87339	4.71576	3.42377	12.2951	9.1922	11.7647	10.7229	15.0943	10.1918	11.1111	9.80392	224	1548	0.559088	0.687038	KLy	GAIN.LOSS	CDS	min25k.min10pr
Kirov_ARC__ALL	1.3259	0.130325	0.168823	0.772568	1.32253	0.131346	0.169825	0.769999	1.31169	0.135627	0.17377	0.760025	1.30032	0.140288	0.178246	0.748979	0.892857	0.322997	0	0	0	0	0	0	0	0	0	0	0.892857	0.0645995	0.129199	0.129199	0	0.139276	1.96078	0.481928	0	0.479616	1.16959	0.140056	224	1548	0.559088	0.687038	KLy	GAIN.LOSS	CDS	min25k.min10pr
PhHs_NervSys_ADX__ALL	0.262537	0.150554	0.170874	0.767324	0.282156	0.155219	0.17084	0.767411	0.238534	0.213254	0.230105	0.638073	0.255358	0.190209	0.207308	0.683384	8.03571	6.20155	1.33929	0.516796	0.446429	0.322997	0.446429	0.193798	0.446429	0	1.78571	4.91071	1.33929	1.22739	2.71318	2.26098	10.6557	5.01393	4.90196	7.22892	5.66038	5.9952	8.77193	6.44258	224	1548	0.559088	0.687038	KLy	GAIN.LOSS	CDS	min25k.min10pr
Neurof_GoNeuronBody__ALL	0.433144	0.16343	0.1761	0.754241	0.456317	0.168798	0.178886	0.747425	0.393603	0.229358	0.239194	0.621249	0.430363	0.196559	0.208071	0.681789	3.125	2.39018	0.446429	0.193798	0.446429	0	0.446429	0	0	0	0.446429	1.33929	1.33929	0.645995	0.516796	1.22739	3.27869	2.50696	2.94118	2.28916	3.77358	2.8777	2.92398	1.82073	224	1548	0.559088	0.687038	KLy	GAIN.LOSS	CDS	min25k.min10pr
PhMm_NeuroUnion_all__ALL	0.0795065	0.23734	0.264322	0.577867	0.136817	0.183212	0.186363	0.729641	0.0714332	0.41191	0.419609	0.377156	0.0815752	0.318268	0.328836	0.48302	25.8929	23.9018	8.92857	6.65375	4.46429	1.93798	0.446429	0.645995	0.446429	0.387597	4.91071	12.9464	8.03571	3.74677	10.2067	9.94832	27.8689	21.1699	23.5294	26.2651	32.0755	23.1415	23.9766	24.7899	224	1548	0.559088	0.823079	KLy	GAIN.LOSS	CDS	min25k.min10pr
PhMm_CompleteLethality__ALL	0.313128	0.191081	0.209446	0.678928	0.341448	0.195008	0.209075	0.679697	0.278231	0.283766	0.297699	0.526222	0.29956	0.240261	0.25404	0.595098	7.58929	5.68475	0.892857	0.581395	0	0.0645995	0	0	0	0	1.78571	2.23214	3.57143	1.29199	2.51938	1.87339	11.4754	3.62117	2.94118	7.46988	15.0943	5.15588	5.26316	6.30252	224	1548	0.59238	0.722984	KLy	GAIN.LOSS	CDS	min25k.min10pr
GI_q4__ALL	0.0638206	0.29493	0.321697	0.492553	0.116465	0.23153	0.234586	0.629698	0.0516009	0.507465	0.512478	0.290325	0.0612781	0.39643	0.406716	0.390709	32.1429	29.9742	11.6071	9.36693	5.80357	3.10078	3.125	1.42119	0.892857	0.775194	5.35714	14.7321	12.0536	3.87597	13.5659	12.5323	32.7869	25.766	31.3725	33.6145	33.9623	28.0576	31.5789	32.2129	224	1548	0.629678	0.901254	KLy	GAIN.LOSS	CDS	min25k.min10pr
PhMm_NeuroBehav_all__ALL	0.0990165	0.264821	0.289327	0.538612	0.140616	0.239489	0.248118	0.605342	0.0832996	0.439897	0.449052	0.347703	0.0964641	0.349922	0.361175	0.442282	17.8571	17.0543	6.25	2.64858	1.33929	0.904393	0.446429	0.452196	0.446429	0.322997	4.01786	6.69643	7.14286	2.71318	6.91214	7.42894	18.8525	14.9025	16.6667	18.9157	20.7547	16.4269	16.9591	17.7871	224	1548	0.632701	0.848209	KLy	GAIN.LOSS	CDS	min25k.min10pr
PhMm_NervSystem_all__ALL	0.0789245	0.333602	0.361771	0.441567	0.1265	0.303403	0.306442	0.513651	0.0590837	0.582862	0.586917	0.231423	0.0743994	0.449489	0.458973	0.338213	20.9821	19.0568	7.58929	4.65116	0.892857	0.968992	0.446429	0.452196	0.446429	0.322997	4.01786	11.1607	5.80357	3.22997	8.26873	7.55814	23.7705	17.1309	17.6471	20.7229	26.4151	18.5851	19.2982	19.6078	224	1548	0.659623	0.935399	KLy	GAIN.LOSS	CDS	min25k.min10pr
BspanHM_lg2rpkm3.21__ALL	0.0402934	0.463168	0.486763	0.312683	0.0724495	0.432306	0.434001	0.362509	0.0191686	0.789766	0.790997	0.101825	0.0323402	0.617793	0.624576	0.204415	30.8036	31.2661	12.9464	9.88372	4.91071	3.22997	2.23214	1.61499	1.78571	0.839793	6.25	14.2857	10.2679	5.03876	13.6951	12.5323	31.9672	30.2228	29.4118	32.1687	30.1887	28.777	30.9942	34.1737	224	1548	0.753994	0.982718	KLy	GAIN.LOSS	CDS	min25k.min10pr
BspanVH_lg2rpkm4.74__ALL	0.0384928	0.49855	0.521959	0.282364	0.0675893	0.479055	0.483467	0.315633	0.0157347	0.828938	0.830276	0.0807777	0.0295173	0.651638	0.659045	0.181085	23.6607	21.3178	8.48214	6.71835	4.01786	2.90698	1.78571	1.55039	1.33929	0.710594	4.01786	10.7143	8.92857	2.77778	11.1111	7.42894	26.2295	21.1699	20.5882	21.4458	32.0755	21.5827	21.0526	21.0084	224	1548	0.753994	0.982718	KLy	GAIN.LOSS	CDS	min25k.min10pr
PhMm_Aggr_Sensory_all__ALL	0.105807	0.457571	0.46954	0.328327	0.118486	0.482665	0.488926	0.310756	0.0670366	0.676472	0.679119	0.168054	0.0879448	0.579597	0.583913	0.233652	12.5	11.8217	2.67857	2.19638	0.446429	0.258398	0.446429	0.129199	0.446429	0.0645995	2.67857	5.80357	4.01786	2.00258	4.32817	5.49096	15.5738	11.2813	8.82353	12.2892	15.0943	11.9904	11.6959	11.6246	224	1548	0.753994	0.962085	KLy	GAIN.LOSS	CDS	min25k.min10pr
PhHs_NervSys_All__ALL	0.0839499	0.47595	0.486321	0.313077	0.0936921	0.502442	0.508276	0.2939	0.055866	0.662572	0.66616	0.176421	0.0687413	0.589624	0.594328	0.225974	16.0714	16.3437	4.01786	3.35917	1.78571	0.839793	0.892857	0.387597	0.446429	0.258398	2.23214	8.48214	5.35714	1.93798	7.81654	6.58915	18.8525	14.9025	12.7451	17.5904	11.3208	16.1871	17.5439	16.5266	224	1548	0.753994	0.962085	KLy	GAIN.LOSS	CDS	min25k.min10pr
HI_q2__ALL	0.0381684	0.546908	0.562749	0.249685	0.0765246	0.512944	0.514821	0.288344	0.00950289	0.907793	0.908027	0.0419012	0.0266307	0.719101	0.722655	0.141069	32.5893	30.8786	9.82143	9.68992	3.57143	3.22997	3.125	1.03359	0.892857	0.645995	7.58929	12.5	12.5	4.78036	13.6305	12.4677	32.7869	30.0836	32.3529	31.5663	33.9623	30.0959	32.1637	31.7927	224	1548	0.753994	0.982718	KLy	GAIN.LOSS	CDS	min25k.min10pr
SynKEGG_GABAergic__ALL	0.339683	0.480797	0.496719	0.30389	0.327293	0.508437	0.521825	0.282475	0.243681	0.633665	0.640572	0.193432	0.291844	0.570776	0.579292	0.237103	0.892857	1.03359	0.446429	0	0.446429	0	0	0	0	0	0.446429	0.446429	0	0.0645995	0.452196	0.516796	1.63934	0.835655	0	1.20482	0	1.07914	1.16959	0.980392	224	1548	0.753994	0.960858	KLy	GAIN.LOSS	CDS	min25k.min10pr
GI_q1__ALL	0.0291031	0.541572	0.552642	0.257556	0.0386407	0.558963	0.564649	0.248221	0.0180064	0.727407	0.73155	0.135756	0.0230381	0.656419	0.662505	0.178811	35.2679	33.2041	10.2679	12.0155	4.91071	4.97416	3.57143	2.71318	2.23214	1.42119	5.35714	12.5	17.4107	4.78036	13.9535	14.4703	38.5246	33.4262	31.3725	33.012	24.5283	32.2542	38.5965	34.3137	224	1548	0.753994	0.982718	KLy	GAIN.LOSS	CDS	min25k.min10pr
HI_q1__ALL	0.0310135	0.552938	0.563537	0.249078	0.0419092	0.570103	0.575818	0.239715	0.0169473	0.770231	0.773198	0.111709	0.0232558	0.685949	0.690965	0.160544	29.4643	30.8786	9.375	11.2403	5.80357	4.78036	3.57143	1.87339	2.67857	1.29199	5.80357	12.0536	11.6071	4.19897	13.3721	13.3075	31.1475	28.9694	27.451	32.5301	20.7547	31.295	32.1637	30.3922	224	1548	0.753994	0.982718	KLy	GAIN.LOSS	CDS	min25k.min10pr
GOP_lessthan500g__ALL	0.00727772	0.70576	0.715824	0.145194	0.0510949	0.589876	0.587069	0.231311	-0.00936069	0.744889	0.743387	-0.128785	0.00103651	0.96659	0.966674	0.0147198	58.0357	62.7907	35.7143	38.0491	27.2321	22.6098	17.4107	14.4703	10.2679	10.0129	10.7143	28.125	19.1964	8.59173	29.1344	25.0646	59.8361	61.6992	55.8824	63.7349	54.717	60.5516	59.0643	65.4062	224	1548	0.753994	0.982718	KLy	GAIN.LOSS	CDS	min25k.min10pr
Neurof_GoNervSysDev_CNS__ALL	0.116367	0.542832	0.55295	0.257315	0.11633	0.58578	0.591368	0.228142	0.061042	0.774541	0.776319	0.10996	0.087661	0.67298	0.676559	0.169694	8.48214	8.26873	1.33929	0.968992	0.446429	0.322997	0.446429	0.129199	0	0.0645995	2.67857	3.125	2.67857	1.87339	3.48837	2.90698	11.4754	6.96379	4.90196	9.39759	7.54717	8.39329	8.77193	8.12325	224	1548	0.753994	0.982718	KLy	GAIN.LOSS	CDS	min25k.min10pr
BspanVHM_EqlNat__ALL	0.0435104	0.59761	0.614854	0.211228	0.0587934	0.640921	0.642624	0.192043	0.000782939	0.994185	0.994186	0.00253253	0.0267252	0.778757	0.781898	0.10685	20.0893	19.7674	5.35714	4.84496	2.23214	1.42119	0.892857	0.516796	0.892857	0.193798	4.91071	7.58929	7.58929	3.29457	9.17313	7.29974	21.3115	18.2451	18.6275	21.0843	18.8679	18.9448	20.4678	20.7283	224	1548	0.799362	0.994186	KLy	GAIN.LOSS	CDS	min25k.min10pr
BspanLA_lg2rpkm.MIN__ALL	0.0174089	0.633664	0.640872	0.193229	0.0217513	0.680534	0.683089	0.165523	0.00331069	0.939551	0.93977	0.0269785	0.0104487	0.803659	0.805624	0.0938674	34.8214	35.5943	16.9643	15.5039	9.375	7.55814	5.80357	4.78036	4.01786	2.97158	4.91071	15.625	14.2857	5.42636	14.9225	15.2455	33.6066	32.5905	36.2745	38.1928	28.3019	34.0528	36.8421	37.395	224	1548	0.829465	0.982718	KLy	GAIN.LOSS	CDS	min25k.min10pr
PSD_BayesGrant_fullset__ALL	0.0533075	0.729904	0.73352	0.134588	0.0449312	0.807295	0.808134	0.0925165	0.00760373	0.963406	0.963449	0.0161712	0.0305851	0.848938	0.849799	0.0706839	13.8393	12.2739	1.78571	1.93798	0.446429	0.452196	0	0.322997	0	0.129199	2.23214	5.35714	6.25	1.74419	5.29716	5.23256	11.4754	11.4206	16.6667	13.012	13.2075	11.7506	14.0351	12.8852	224	1548	0.895975	0.982718	KLy	GAIN.LOSS	CDS	min25k.min10pr
PhMm_Aggr_IntegAdipPigm_all__ALL	0.0400172	0.749002	0.75231	0.123603	0.0320117	0.831789	0.83245	0.079642	-0.012845	0.928714	0.92858	-0.0321806	0.0126739	0.926705	0.92687	0.0329811	16.9643	14.3411	2.23214	3.81137	0.892857	0.775194	0.446429	0.193798	0.446429	0.129199	4.91071	2.67857	9.375	2.51938	5.55556	6.26615	19.6721	12.6741	13.7255	15.7831	22.6415	13.3094	15.2047	15.5462	224	1548	0.899326	0.982718	KLy	GAIN.LOSS	CDS	min25k.min10pr
Kirov_NMDAR__ALL	0.178549	0.808675	0.813292	0.0897536	0.13528	0.859648	0.861643	0.0646728	-0.0521085	0.948024	0.947762	-0.0233008	0.103488	0.889342	0.890705	0.050266	0.892857	0.775194	0	0.0645995	0	0	0	0	0	0	0	0	0.892857	0.258398	0.258398	0.258398	0	0.696379	1.96078	0.843373	0	0.839329	1.16959	0.70028	224	1548	0.899326	0.982718	KLy	GAIN.LOSS	CDS	min25k.min10pr
PhMm_Aggr_EndoExocrRepr_all__ALL	0.0333291	0.764408	0.767723	0.114796	0.0256345	0.863766	0.864058	0.063457	-0.0225353	0.865538	0.865043	-0.0629624	0.00722253	0.95347	0.953547	0.020658	18.75	17.5065	4.91071	3.87597	1.33929	0.904393	0.446429	0.322997	0	0.258398	4.46429	6.69643	7.58929	3.10078	7.62274	6.78295	22.9508	15.3203	13.7255	19.3976	16.9811	16.0671	19.2982	19.1877	224	1548	0.899326	0.982718	KLy	GAIN.LOSS	CDS	min25k.min10pr
PhHs_MindFun_ADX__ALL	0.0502985	0.937329	0.937666	0.027952	0.0123382	0.985087	0.985105	0.00651757	-0.0870185	0.897419	0.896509	-0.0474455	-0.0263981	0.968044	0.967961	-0.0141423	1.33929	1.16279	0	0	0	0	0	0	0	0	0.892857	0.446429	0	0.387597	0.322997	0.452196	0.819672	0.97493	1.96078	1.3253	0	0.959233	1.75439	1.40056	224	1548	0.985105	0.982718	KLy	GAIN.LOSS	CDS	min25k.min10pr
PhHs_MindFun_All__ALL	-0.00636005	0.980729	0.980713	-0.00845815	-0.026501	0.922915	0.922682	-0.0349481	-0.050422	0.852029	0.851104	-0.0700174	-0.0330727	0.90177	0.901374	-0.0450952	5.80357	6.84755	1.33929	0.516796	0	0	0	0	0	0	1.33929	2.23214	2.23214	0.904393	2.45478	3.48837	4.91803	6.26741	6.86275	7.3494	3.77358	6.83453	6.43275	6.86275	224	1548	0.941135	0.982718	KLy	GAIN.LOSS	CDS	min25k.min10pr
BspanVHM_PreNat__ALL	-0.00368022	0.970064	0.969997	-0.0132297	-0.0356559	0.782431	0.781889	-0.106855	-0.053141	0.623941	0.620104	-0.207536	-0.0269144	0.795219	0.793135	-0.100653	18.3036	18.863	6.25	5.16796	2.67857	1.74419	0.892857	0.839793	0	0.516796	1.78571	10.7143	5.80357	2.84238	8.97933	7.04134	21.3115	18.3844	14.7059	19.2771	18.8679	17.7458	18.1287	20.1681	224	1548	0.886141	0.958342	KLy	GAIN.LOSS	CDS	min25k.min10pr
GI_q3__ALL	0.000611505	0.993036	0.993042	0.00303224	-0.0317702	0.768989	0.768107	-0.114579	-0.0493295	0.547902	0.543489	-0.264809	-0.021941	0.780008	0.77586	-0.110216	28.5714	27.261	9.82143	8.59173	2.23214	2.51938	0.892857	1.42119	0.446429	0.904393	5.35714	15.1786	8.03571	4.32817	12.5323	10.4005	31.1475	25.766	25.4902	28.5542	35.8491	27.2182	26.3158	27.3109	224	1548	0.886141	0.923932	KLy	GAIN.LOSS	CDS	min25k.min10pr
PhMm_Aggr_SkeCranioLimbs_all__ALL	-0.0244967	0.860187	0.857814	-0.066607	-0.0554321	0.732719	0.72546	-0.139387	-0.0840668	0.595546	0.579543	-0.236914	-0.0601105	0.692743	0.682996	-0.165582	12.0536	14.2765	2.23214	2.00258	1.33929	0.452196	0.446429	0.258398	0	0.193798	2.23214	5.80357	4.01786	1.87339	6.45995	5.94315	15.5738	11.9777	7.84314	16.2651	15.0943	14.6283	11.1111	13.8655	224	1548	0.860429	0.935399	KLy	GAIN.LOSS	CDS	min25k.min10pr
PhMm_Aggr_CardvascMuscle_all__ALL	-0.0311641	0.788748	0.785123	-0.105062	-0.080947	0.57535	0.572725	-0.242054	-0.102657	0.422787	0.414677	-0.38229	-0.067957	0.586975	0.57788	-0.238163	18.75	17.5711	4.01786	4.52196	0.892857	1.03359	0	0.516796	0	0.258398	4.46429	8.03571	6.25	3.10078	7.49354	6.97674	21.3115	15.8774	15.6863	19.0361	18.8679	15.5875	18.7135	19.888	224	1548	0.753994	0.823079	KLy	GAIN.LOSS	CDS	min25k.min10pr
SynKEGG_Serotonergic__ALL	-0.374774	0.621022	0.604517	-0.218591	-0.41666	0.588284	0.5695	-0.244506	-0.52956	0.507254	0.479799	-0.318941	-0.440435	0.567731	0.547027	-0.261992	0.892857	1.29199	0	0	0	0	0	0	0	0	0.446429	0	0.446429	0.129199	0.516796	0.645995	0.819672	1.11421	0.980392	1.44578	0	1.31894	1.16959	1.2605	224	1548	0.753994	0.873919	KLy	GAIN.LOSS	CDS	min25k.min10pr
Neurof_KeggSynaptic__ALL	-0.158084	0.648997	0.638754	-0.194666	-0.21193	0.559125	0.548357	-0.260936	-0.295943	0.412953	0.396915	-0.401303	-0.216584	0.535928	0.522906	-0.281576	2.67857	3.48837	0.446429	0.258398	0.446429	0.0645995	0	0.0645995	0	0	0.446429	0.446429	1.78571	0.516796	1.42119	1.55039	1.63934	2.78552	3.92157	4.09639	0	2.63789	3.50877	4.48179	224	1548	0.753994	0.823079	KLy	GAIN.LOSS	CDS	min25k.min10pr
HI_q4__ALL	-0.0261057	0.768096	0.764496	-0.116625	-0.073691	0.525544	0.52259	-0.281839	-0.0875739	0.393063	0.38227	-0.41763	-0.0592215	0.545785	0.536526	-0.270409	22.3214	25	7.58929	6.91214	3.125	2.39018	1.78571	1.09819	0.892857	0.581395	5.35714	9.82143	7.14286	4.26357	11.9509	8.78553	22.9508	23.3983	21.5686	26.3855	22.6415	22.6619	22.2222	27.7311	224	1548	0.753994	0.823079	KLy	GAIN.LOSS	CDS	min25k.min10pr
PhMm_Aggr_DigestHepato_all__ALL	-0.10809	0.506542	0.489903	-0.30989	-0.168877	0.34836	0.336279	-0.473301	-0.189928	0.250697	0.237134	-0.625007	-0.149089	0.372972	0.352169	-0.453249	12.0536	14.4057	2.23214	2.58398	0.446429	0.452196	0	0.193798	0	0.129199	1.78571	4.91071	5.35714	2.64858	5.49096	6.26615	14.7541	11.4206	8.82353	16.988	15.0943	14.5084	11.1111	14.2857	224	1548	0.659623	0.687038	KLy	GAIN.LOSS	CDS	min25k.min10pr
PhMm_Aggr_HematoImmune_all__ALL	-0.0589151	0.586117	0.574043	-0.241055	-0.129283	0.339758	0.333275	-0.477198	-0.123299	0.287822	0.274286	-0.561796	-0.0924155	0.417988	0.40093	-0.396932	19.1964	19.5736	4.01786	5.87855	1.78571	1.87339	0.446429	0.839793	0	0.387597	3.125	6.69643	9.375	2.77778	8.46253	8.33333	19.6721	15.8774	18.6275	22.7711	20.7547	18.705	18.7135	20.5882	224	1548	0.659623	0.699429	KLy	GAIN.LOSS	CDS	min25k.min10pr
Neurof_PathwaysAxonG__ALL	-0.358917	0.419116	0.388966	-0.410088	-0.437533	0.340659	0.312687	-0.50489	-0.493234	0.278525	0.24536	-0.610196	-0.407593	0.359236	0.326364	-0.486298	2.23214	3.16537	0	0.516796	0	0.0645995	0	0	0	0	1.33929	0.446429	0.446429	0.904393	1.29199	0.968992	2.45902	2.22841	1.96078	3.9759	1.88679	3.23741	2.33918	3.08123	224	1548	0.659623	0.687038	KLy	GAIN.LOSS	CDS	min25k.min10pr
HI_q3__ALL	-0.0354446	0.651219	0.638358	-0.194936	-0.109612	0.318896	0.312335	-0.505379	-0.0967236	0.257108	0.244965	-0.610895	-0.0648287	0.447531	0.423959	-0.372676	28.5714	30.0388	8.92857	8.46253	3.57143	2.71318	1.78571	1.35659	0.446429	0.775194	4.91071	13.3929	10.2679	4.78036	13.7597	11.4987	32.7869	27.7159	23.5294	32.0482	20.7547	26.9784	30.9942	33.6134	224	1548	0.659623	0.687038	KLy	GAIN.LOSS	CDS	min25k.min10pr
SynKEGG_Glutamatergic__ALL	-0.859989	0.402669	0.338399	-0.470571	-0.909228	0.372572	0.307092	-0.512732	-1.06772	0.29246	0.224994	-0.647829	-0.886672	0.382174	0.313238	-0.504126	0.446429	1.03359	0	0.0645995	0	0	0	0	0	0	0	0	0.446429	0.193798	0.387597	0.452196	0	0.557103	0.980392	1.44578	0	0.839329	0.584795	1.2605	224	1548	0.659623	0.687038	KLy	GAIN.LOSS	CDS	min25k.min10pr
GI_q2__ALL	-0.0720013	0.417455	0.388531	-0.410575	-0.162895	0.156796	0.139957	-0.854007	-0.139321	0.126272	0.11	-0.958609	-0.111033	0.247733	0.214288	-0.669001	18.3036	26.4858	7.14286	7.75194	3.57143	2.64858	2.67857	1.42119	1.33929	0.904393	5.80357	7.14286	5.35714	3.94057	13.8889	8.65633	18.0328	27.0195	18.6275	26.0241	20.7547	25.7794	17.5439	27.3109	224	1548	0.559088	0.687038	KLy	GAIN.LOSS	CDS	min25k.min10pr
BspanML_lg2rpkm0.93__ALL	-0.0708089	0.313616	0.292504	-0.533868	-0.170333	0.072731	0.0688498	-1.1621	-0.123454	0.0970468	0.087898	-1.05602	-0.104938	0.167655	0.148415	-0.828523	32.1429	36.9509	11.1607	14.5349	5.80357	6.00775	2.67857	2.26098	1.78571	1.48579	6.69643	15.1786	10.2679	5.29716	16.9251	14.7287	32.7869	33.7047	31.3725	39.759	24.5283	35.1319	34.5029	39.0756	224	1548	0.438917	0.687038	KLy	GAIN.LOSS	CDS	min25k.min10pr
SynKEGG_Dopaminergic__ALL	-14.4959	0.975345	0.0110609	-1.95621	-14.5882	0.97527	0.00843532	-2.0739	-14.4974	0.97484	0.00592048	-2.22764	-14.526	0.975398	0.00957722	-2.01876	0	1.35659	0	0.129199	0	0	0	0	0	0	0	0	0	0.129199	0.581395	0.645995	0	0.835655	0	1.80723	0	0.839329	0	1.96078	224	1548	0.143401	0.150972	KLy	GAIN.LOSS	CDS	min25k.min10pr
SynKEGG_Cholinergic__ALL	-14.5836	0.973473	0.00598121	-2.22321	-14.625	0.973539	0.00503882	-2.29767	-14.5682	0.973123	0.00350387	-2.45545	-14.6027	0.973551	0.00534776	-2.27183	0	1.67959	0	0.0645995	0	0	0	0	0	0	0	0	0	0.258398	0.904393	0.516796	0	1.25348	0	2.04819	0	1.31894	0	2.10084	224	1548	0.12849	0.150972	KLy	GAIN.LOSS	CDS	min25k.min10pr
FMR1_Targets_Darnell__ALL	0.495524	0.0128889	0.0179309	1.7464	0.616362	0.00453269	0.00645795	2.18991	0.524586	0.011148	0.0151101	1.82073	0.548163	0.00860823	0.0118813	1.92514	11.9816	7.33642	2.30415	0.462657	0	0.0660939	0	0	0	0	1.84332	4.60829	5.52995	1.25578	3.63516	2.44547	13.4454	7.64873	10.2041	7.0632	9.80392	6.51907	12.6506	8.28571	217	1513	0.254272	0.285535	KLn	GAIN.LOSS	CDS	min25k.min10pr
BspanVHM_PstNat__ALL	0.0980162	0.231626	0.265468	0.575989	0.258	0.0446206	0.047891	1.31975	0.142728	0.179848	0.189715	0.721899	0.140591	0.151668	0.169918	0.769761	21.659	18.4402	5.06912	5.3536	1.84332	1.58625	1.84332	0.264375	1.38249	0.132188	3.68664	9.21659	8.75576	2.24719	8.26173	7.93126	24.3697	18.272	18.3673	18.5874	27.451	17.5892	19.8795	19.4286	217	1513	0.407074	0.850602	KLn	GAIN.LOSS	CDS	min25k.min10pr
Neurof_UnionStringent__ALL	0.132405	0.298765	0.340622	0.467727	0.297254	0.108639	0.122143	0.91313	0.209036	0.234362	0.245757	0.609494	0.189996	0.21272	0.239664	0.620397	11.5207	8.65829	1.84332	1.38797	0.460829	0.330469	0	0.198282	0	0.0660939	1.84332	5.06912	4.60829	1.25578	3.70126	3.70126	12.605	7.08215	10.2041	10.0372	11.7647	8.24108	11.4458	9.14286	217	1513	0.702639	0.850602	KLn	GAIN.LOSS	CDS	min25k.min10pr
Neurof_GoNervSysDev__ALL	0.111072	0.329128	0.364906	0.437819	0.252585	0.122617	0.132594	0.877477	0.168117	0.267454	0.277237	0.557149	0.161035	0.23389	0.256942	0.590165	15.2074	12.9544	3.22581	2.37938	0.460829	0.727032	0	0.198282	0	0.198282	2.76498	7.37327	5.06912	1.85063	5.94845	5.15532	17.6471	10.7649	12.2449	14.8699	17.6471	13.4071	14.4578	12.4286	217	1513	0.702639	0.850602	KLn	GAIN.LOSS	CDS	min25k.min10pr
Kirov_ARC__ALL	1.475	0.103748	0.137439	0.86189	1.49352	0.0998651	0.133367	0.874952	1.47681	0.10347	0.13717	0.862742	1.51255	0.0961729	0.129722	0.886988	0.921659	0.264375	0	0	0	0	0	0	0	0	0	0	0.921659	0.0660939	0.0660939	0.132188	0	0.141643	2.04082	0.371747	0	0.369004	1.20482	0.142857	217	1513	0.702639	0.850602	KLn	GAIN.LOSS	CDS	min25k.min10pr
Neurof_GoNeuronProj__ALL	0.139294	0.306293	0.346515	0.460277	0.296444	0.124012	0.137772	0.860838	0.207088	0.252743	0.26462	0.577377	0.191	0.229757	0.257084	0.589924	11.9816	8.92267	0.921659	1.0575	0.460829	0.330469	0	0.198282	0	0.0660939	1.84332	5.06912	5.06912	1.1236	3.43688	4.36219	12.605	7.36544	11.2245	10.285	11.7647	8.85609	12.0482	9	217	1513	0.702639	0.850602	KLn	GAIN.LOSS	CDS	min25k.min10pr
Neurof_UnionInclusive__ALL	0.0690591	0.418082	0.450408	0.346394	0.186592	0.149493	0.157174	0.803621	0.107579	0.351587	0.358484	0.44553	0.104076	0.3056	0.328613	0.483315	23.5023	19.9603	5.52995	4.62657	1.38249	1.18969	0	0.528751	0	0.198282	3.68664	10.5991	9.21659	2.57766	9.25314	8.12954	26.8908	17.9887	19.3878	21.6853	25.4902	19.3112	22.8916	20.7143	217	1513	0.705617	0.870604	KLn	GAIN.LOSS	CDS	min25k.min10pr
FMR1_Targets_Ascano__ALL	0.199578	0.295146	0.311662	0.506317	0.302149	0.159631	0.171742	0.765123	0.222819	0.27501	0.286808	0.542408	0.238148	0.240585	0.253645	0.595774	10.5991	9.58361	1.84332	0.660939	0.460829	0.198282	0	0.0660939	0	0.0660939	1.38249	5.06912	4.14747	1.38797	4.69266	3.50297	10.084	9.06516	11.2245	10.0372	11.7647	9.7171	10.241	9.42857	217	1513	0.705617	0.850602	KLn	GAIN.LOSS	CDS	min25k.min10pr
Neurof_GoNervTransm__ALL	0.204264	0.33225	0.355336	0.44936	0.308487	0.20553	0.21966	0.658249	0.242868	0.306005	0.318192	0.497311	0.253412	0.272636	0.288758	0.539466	8.29493	5.61798	0.921659	0.660939	0	0.0660939	0	0.0660939	0	0.0660939	1.38249	2.76498	4.14747	0.991408	2.70985	1.91672	8.40336	5.09915	8.16327	6.07187	9.80392	4.42804	7.83133	7	217	1513	0.705617	0.854095	KLn	GAIN.LOSS	CDS	min25k.min10pr
PhMm_CompleteLethality__ALL	0.24822	0.362334	0.378186	0.422294	0.338324	0.246909	0.262473	0.580915	0.272167	0.342872	0.356682	0.447719	0.289419	0.309903	0.324642	0.488595	6.45161	5.15532	0.460829	0.396563	0	0.0660939	0	0	0	0	1.38249	1.84332	3.22581	0.991408	2.31328	1.85063	10.084	3.54108	2.04082	6.56753	13.7255	4.67405	4.21687	5.71429	217	1513	0.705617	0.870604	KLn	GAIN.LOSS	CDS	min25k.min10pr
PhMm_NeuroUnion_all__ALL	0.050368	0.578955	0.593854	0.226321	0.140039	0.268994	0.273711	0.562709	0.0698055	0.531033	0.534948	0.271688	0.0775012	0.45896	0.470989	0.326989	23.5023	22.7363	7.37327	5.88235	2.76498	1.38797	0	0.264375	0	0.198282	2.76498	12.4424	8.29493	2.70985	10.1785	9.84798	26.0504	20.1133	20.4082	25.031	29.4118	22.0172	21.6867	23.5714	217	1513	0.705617	0.919609	KLn	GAIN.LOSS	CDS	min25k.min10pr
PhMm_NervSystem_all__ALL	0.0501196	0.631324	0.64523	0.190286	0.14398	0.322285	0.32794	0.484206	0.0718942	0.58271	0.585993	0.232108	0.0801987	0.507681	0.519853	0.28412	18.894	17.9775	5.99078	4.03173	0.460829	0.594845	0	0.264375	0	0.198282	2.30415	10.5991	5.99078	2.37938	8.12954	7.46861	21.8487	16.289	15.3061	19.4548	23.5294	17.4662	17.4699	18.5714	217	1513	0.705617	0.919609	KLn	GAIN.LOSS	CDS	min25k.min10pr
BspanVH_lg2rpkm4.74__ALL	0.0248968	0.740348	0.749908	0.124992	0.116783	0.323412	0.328255	0.483789	0.0365207	0.699416	0.702097	0.153603	0.0425584	0.619713	0.631506	0.199623	21.659	20.5552	6.45161	6.01454	2.76498	2.115	0.921659	1.0575	0.460829	0.330469	2.76498	9.67742	9.21659	1.98282	10.9716	7.60079	24.3697	20.6799	18.3673	20.4461	29.4118	20.7872	19.2771	20.2857	217	1513	0.705617	0.919609	KLn	GAIN.LOSS	CDS	min25k.min10pr
Neurof_GoSynaptic__ALL	0.205501	0.44635	0.461708	0.335633	0.293116	0.316787	0.332055	0.47879	0.230448	0.425267	0.437006	0.359513	0.244926	0.388276	0.402469	0.395268	5.52995	4.42829	0.921659	0.396563	0	0.0660939	0	0.0660939	0	0	1.38249	1.84332	2.30415	0.528751	1.85063	2.04891	5.88235	4.39093	5.10204	4.46097	5.88235	3.93604	5.42169	5	217	1513	0.705617	0.896824	KLn	GAIN.LOSS	CDS	min25k.min10pr
BspanLA_lg2rpkm.MIN__ALL	0.00571282	0.88391	0.884794	0.053158	0.0600243	0.347374	0.349853	0.456114	0.00764184	0.864399	0.865514	0.0627257	0.0134062	0.757791	0.761089	0.118564	33.6406	34.8315	15.2074	14.805	7.8341	6.93985	4.14747	4.2961	3.68664	2.70985	3.68664	15.2074	14.7465	4.62657	14.8711	15.3338	32.7731	31.728	34.6939	37.5465	27.451	32.9643	35.5422	37	217	1513	0.713701	0.919609	KLn	GAIN.LOSS	CDS	min25k.min10pr
HI_q2__ALL	0.0121727	0.877169	0.878713	0.056153	0.113292	0.369993	0.373652	0.427532	0.0180054	0.851403	0.851883	0.0696201	0.0295059	0.744024	0.747754	0.126241	30.4147	29.61	8.29493	8.92267	2.30415	2.70985	2.30415	0.594845	0.460829	0.330469	5.52995	11.9816	12.9032	3.76735	13.1527	12.69	31.0924	29.1785	29.5918	29.9876	31.3725	28.6593	30.1205	30.7143	217	1513	0.732933	0.919609	KLn	GAIN.LOSS	CDS	min25k.min10pr
GI_q1__ALL	0.0118791	0.825579	0.827688	0.0821335	0.0632898	0.396691	0.405174	0.392358	0.0129952	0.816954	0.819196	0.0866121	0.0185822	0.743333	0.747585	0.126339	34.5622	32.2538	8.75576	11.1699	3.68664	4.49438	2.30415	2.31328	1.84332	1.1236	4.14747	12.4424	17.9724	3.83344	13.8797	14.5406	37.8151	32.8612	30.6122	31.7224	23.5294	31.3653	37.9518	33.2857	217	1513	0.742113	0.919609	KLn	GAIN.LOSS	CDS	min25k.min10pr
GI_q4__ALL	0.0230372	0.76855	0.773403	0.111594	0.0891904	0.407367	0.411391	0.385745	0.030688	0.73859	0.740264	0.130613	0.0405121	0.64684	0.652999	0.185087	29.9539	29.0152	8.75576	8.32783	3.22581	2.31328	1.38249	0.85922	0.460829	0.396563	3.22581	14.2857	12.4424	2.97422	13.4171	12.6239	31.0924	25.0708	28.5714	32.4659	31.3725	27.0603	29.5181	31.2857	217	1513	0.742113	0.919609	KLn	GAIN.LOSS	CDS	min25k.min10pr
PhHs_NervSys_ADX__ALL	0.141152	0.567287	0.577775	0.238241	0.202492	0.43882	0.451928	0.344931	0.144816	0.562565	0.57275	0.242035	0.159914	0.525569	0.537125	0.269925	6.45161	5.48579	0.921659	0.264375	0	0.198282	0	0.132188	0	0	0.921659	4.14747	1.38249	0.594845	2.64375	2.24719	8.40336	4.53258	4.08163	6.3197	1.96078	5.16605	7.83133	5.85714	217	1513	0.76798	0.919609	KLn	GAIN.LOSS	CDS	min25k.min10pr
PSD_BayesGrant_fullset__ALL	0.0644724	0.70405	0.708498	0.149661	0.138828	0.475651	0.482216	0.316758	0.0724318	0.688991	0.691978	0.159907	0.0852637	0.633812	0.638664	0.194727	12.4424	11.5003	1.84332	1.45406	0.460829	0.330469	0	0.198282	0	0.0660939	1.84332	5.06912	5.52995	1.25578	5.02313	5.22141	10.084	10.9065	15.3061	12.0198	9.80392	10.9471	13.253	12.1429	217	1513	0.76798	0.919609	KLn	GAIN.LOSS	CDS	min25k.min10pr
PhMm_NeuroBehav_all__ALL	0.0386149	0.7627	0.767011	0.115198	0.102884	0.506699	0.511987	0.290741	0.0468665	0.742503	0.744457	0.12816	0.0574202	0.677557	0.682528	0.16588	15.6682	15.8625	4.60829	2.115	0.460829	0.528751	0	0.264375	0	0.198282	2.30415	5.99078	7.37327	1.65235	6.87376	7.33642	16.8067	13.881	14.2857	17.596	17.6471	15.2522	15.0602	16.5714	217	1513	0.76798	0.919609	KLn	GAIN.LOSS	CDS	min25k.min10pr
Neurof_GoNeuronBody__ALL	0.223488	0.628402	0.638772	0.194654	0.298023	0.52941	0.544397	0.264084	0.227929	0.624868	0.635222	0.197074	0.247368	0.596433	0.608189	0.215962	2.30415	1.91672	0	0.198282	0	0	0	0	0	0	0	0.921659	1.38249	0.330469	0.462657	1.1236	2.52101	2.12465	2.04082	1.73482	1.96078	2.46002	2.40964	1.28571	217	1513	0.793265	0.919609	KLn	GAIN.LOSS	CDS	min25k.min10pr
GOP_lessthan500g__ALL	-0.0111218	0.697482	0.684214	-0.164808	0.0592583	0.568395	0.565264	0.247749	-0.017846	0.606777	0.601608	-0.220687	-0.00975672	0.774099	0.768491	-0.114361	56.682	61.9299	33.6406	36.8143	24.8848	21.4144	14.7465	13.4171	7.8341	8.98876	8.75576	28.1106	19.8157	7.5347	29.0813	25.3139	58.8235	61.0482	54.0816	62.7014	52.9412	59.5326	57.8313	64.7143	217	1513	0.80079	0.919609	KLn	GAIN.LOSS	CDS	min25k.min10pr
Kirov_NMDAR__ALL	0.269538	0.715468	0.725357	0.139448	0.383065	0.625723	0.63954	0.194132	0.303771	0.701146	0.709447	0.14908	0.325373	0.671266	0.682612	0.165826	0.921659	0.660939	0	0.0660939	0	0	0	0	0	0	0	0	0.921659	0.132188	0.264375	0.264375	0	0.566572	2.04082	0.743494	0	0.615006	1.20482	0.714286	217	1513	0.819958	0.919609	KLn	GAIN.LOSS	CDS	min25k.min10pr
HI_q1__ALL	-0.00445536	0.941567	0.941305	-0.0262698	0.0396743	0.639314	0.643105	0.191718	-0.00482339	0.940007	0.939749	-0.0269882	0.00147961	0.981616	0.981639	0.00804799	27.6498	29.8083	7.37327	10.7072	3.68664	4.36219	2.30415	1.65235	1.84332	1.0575	4.60829	11.0599	11.9816	3.37079	13.0205	13.4171	29.4118	27.9037	25.5102	31.4746	17.6471	30.0123	30.7229	29.5714	217	1513	0.819958	0.978106	KLn	GAIN.LOSS	CDS	min25k.min10pr
BspanHM_lg2rpkm3.21__ALL	-0.011994	0.878637	0.876786	-0.0571065	0.0289061	0.78251	0.783389	0.106022	-0.0154024	0.861992	0.86125	-0.0648708	-0.0029835	0.97246	0.972401	-0.0121548	28.5714	30.271	10.1382	8.92267	1.84332	2.64375	0.921659	1.18969	0.921659	0.396563	4.14747	13.8249	10.5991	3.96563	13.5492	12.7561	30.2521	29.4618	26.5306	30.9789	27.451	27.6753	28.9157	33.2857	217	1513	0.916871	0.919609	KLn	GAIN.LOSS	CDS	min25k.min10pr
PhMm_Aggr_Sensory_all__ALL	-0.00182753	0.991828	0.991825	-0.00356514	0.0482714	0.806641	0.807794	0.0926995	-0.00164644	0.992963	0.992961	-0.00306782	0.0133877	0.942669	0.942803	0.0255792	11.0599	10.7072	1.84332	1.91672	0	0.198282	0	0.132188	0	0.0660939	1.38249	5.52995	4.14747	1.18969	4.09782	5.4197	13.4454	9.91501	8.16327	11.4002	13.7255	10.5781	10.241	10.8571	217	1513	0.916871	0.992961	KLn	GAIN.LOSS	CDS	min25k.min10pr
PhHs_NervSys_All__ALL	-0.00344835	0.981223	0.981205	-0.00824019	0.0395015	0.807827	0.809004	0.0920492	-0.00343709	0.981874	0.98186	-0.00795048	0.00736066	0.961418	0.961482	0.0170588	14.2857	15.0694	2.76498	2.51157	0.921659	0.462657	0.460829	0.264375	0	0.264375	0.921659	7.8341	5.52995	1.0575	7.40251	6.60939	16.8067	14.0227	11.2245	15.9851	7.84314	14.6371	16.2651	15.5714	217	1513	0.916871	0.992961	KLn	GAIN.LOSS	CDS	min25k.min10pr
PhMm_Aggr_EndoExocrRepr_all__ALL	-0.0221541	0.86912	0.86795	-0.0615055	0.0305805	0.851588	0.852043	0.0695385	-0.0271627	0.855432	0.854824	-0.0681234	-0.00933926	0.948489	0.948372	-0.0230212	17.5115	16.2591	3.22581	3.37079	0.460829	0.660939	0	0.132188	0	0.132188	3.22581	6.45161	7.8341	2.31328	7.13814	6.80767	21.0084	14.3059	13.2653	17.9678	15.6863	14.3911	18.0723	18.4286	217	1513	0.924557	0.919609	KLn	GAIN.LOSS	CDS	min25k.min10pr
GI_q3__ALL	-0.0316826	0.724242	0.713365	-0.146688	0.00556677	0.963807	0.963834	0.0159978	-0.0401792	0.679649	0.675611	-0.170303	-0.0256919	0.791329	0.787131	-0.103953	26.7281	26.6358	8.75576	8.12954	1.38249	2.04891	0	0.925314	0	0.396563	4.14747	14.7465	7.8341	3.43688	12.5578	10.6411	29.4118	25.2125	23.4694	27.881	33.3333	26.6913	24.6988	26.5714	217	1513	0.963834	0.919609	KLn	GAIN.LOSS	CDS	min25k.min10pr
PhHs_MindFun_ADX__ALL	-0.129975	0.865859	0.863844	-0.0635645	-0.0505765	0.948405	0.948121	-0.0231362	-0.132554	0.864889	0.862894	-0.0640427	-0.106209	0.890919	0.889617	-0.0507971	0.921659	0.991408	0	0	0	0	0	0	0	0	0.460829	0.460829	0	0.264375	0.264375	0.462657	0	0.849858	2.04082	1.11524	0	0.861009	1.20482	1.14286	217	1513	0.963834	0.919609	KLn	GAIN.LOSS	CDS	min25k.min10pr
Neurof_GoNervSysDev_CNS__ALL	-0.062435	0.803526	0.800998	-0.0963687	-0.0216631	0.935029	0.934834	-0.0292657	-0.0671286	0.796248	0.794231	-0.100053	-0.0482498	0.852538	0.851381	-0.069876	6.91244	7.40251	0.460829	0.727032	0	0.264375	0	0.132188	0	0.0660939	1.38249	2.76498	2.76498	1.1236	3.37079	2.90813	10.084	6.51558	3.06122	8.17844	5.88235	7.62608	7.22892	7.14286	217	1513	0.963834	0.919609	KLn	GAIN.LOSS	CDS	min25k.min10pr
BspanVHM_EqlNat__ALL	-0.0488805	0.690386	0.677674	-0.168979	-0.014892	0.920522	0.920329	-0.0360568	-0.06145	0.643261	0.637459	-0.195548	-0.0419467	0.75038	0.744695	-0.128021	17.9724	19.035	3.22581	4.36219	0.921659	0.991408	0.460829	0.330469	0.460829	0.132188	3.68664	6.91244	7.37327	2.64375	8.98876	7.40251	19.3277	17.7054	16.3265	20.1983	15.6863	18.2042	18.6747	20	217	1513	0.963834	0.919609	KLn	GAIN.LOSS	CDS	min25k.min10pr
PhMm_Aggr_IntegAdipPigm_all__ALL	-0.0628967	0.686406	0.680685	-0.167054	-0.0322564	0.850493	0.849817	-0.0706745	-0.070374	0.666562	0.662902	-0.178551	-0.0547947	0.736897	0.733926	-0.134348	15.2074	13.2849	0.921659	3.2386	0	0.528751	0	0.132188	0	0.0660939	3.22581	2.30415	9.67742	1.58625	5.48579	6.21282	17.6471	11.7564	12.2449	14.6221	21.5686	12.4231	13.253	14.2857	217	1513	0.924557	0.919609	KLn	GAIN.LOSS	CDS	min25k.min10pr
PhMm_Aggr_SkeCranioLimbs_all__ALL	-0.092766	0.595622	0.576093	-0.239508	-0.0639796	0.734815	0.727523	-0.138153	-0.102796	0.574443	0.556078	-0.254864	-0.0859893	0.635949	0.620822	-0.207033	11.0599	13.4831	1.38249	1.65235	0.921659	0.264375	0	0.132188	0	0.132188	1.84332	5.06912	4.14747	1.32188	6.21282	5.94845	14.2857	11.4731	7.14286	15.2416	13.7255	13.7761	10.241	13.1429	217	1513	0.88342	0.919609	KLn	GAIN.LOSS	CDS	min25k.min10pr
PhHs_MindFun_All__ALL	-0.165198	0.58219	0.573456	-0.2415	-0.132099	0.669011	0.663969	-0.177852	-0.168029	0.578933	0.570375	-0.243839	-0.157741	0.602947	0.595293	-0.225269	4.60829	6.14673	0.921659	0.462657	0	0	0	0	0	0	0.460829	1.84332	2.30415	0.528751	2.115	3.50297	2.52101	5.80737	7.14286	6.44362	1.96078	6.02706	5.42169	6.28571	217	1513	0.825913	0.919609	KLn	GAIN.LOSS	CDS	min25k.min10pr
BspanVHM_PreNat__ALL	-0.0899223	0.485712	0.468139	-0.329625	-0.0725927	0.618212	0.614969	-0.211146	-0.0985011	0.453393	0.443032	-0.353565	-0.0867279	0.514319	0.502586	-0.298789	16.129	17.8453	4.14747	4.23001	1.38249	1.18969	0.460829	0.396563	0	0.198282	0.921659	9.21659	5.99078	1.91672	8.79048	7.13814	19.3277	17.7054	12.2449	17.9678	15.6863	16.4822	16.2651	19.4286	217	1513	0.819958	0.896824	KLn	GAIN.LOSS	CDS	min25k.min10pr
PhMm_Aggr_CardvascMuscle_all__ALL	-0.10542	0.473757	0.454371	-0.342589	-0.0869305	0.596234	0.592335	-0.227433	-0.118644	0.4317	0.421325	-0.375383	-0.102795	0.503698	0.491473	-0.3085	16.5899	16.7878	2.30415	3.76735	0.460829	0.594845	0	0.198282	0	0.132188	2.76498	7.37327	6.45161	2.31328	7.46861	7.00595	19.3277	15.2975	13.2653	18.0917	17.6471	14.8831	16.2651	19	217	1513	0.816462	0.896824	KLn	GAIN.LOSS	CDS	min25k.min10pr
SynKEGG_GABAergic__ALL	-0.70202	0.503255	0.460845	-0.336445	-0.648181	0.53857	0.502193	-0.299129	-0.71389	0.499522	0.457205	-0.339889	-0.686372	0.513859	0.473467	-0.32471	0.460829	0.991408	0	0	0	0	0	0	0	0	0	0.460829	0	0.0660939	0.462657	0.462657	0.840336	0.849858	0	1.11524	0	1.10701	0.60241	0.857143	217	1513	0.76798	0.896824	KLn	GAIN.LOSS	CDS	min25k.min10pr
SynKEGG_Glutamatergic__ALL	-0.734648	0.475007	0.423255	-0.373398	-0.690101	0.509249	0.467452	-0.330263	-0.753183	0.464325	0.415354	-0.381582	-0.723725	0.484144	0.43581	-0.360703	0.460829	0.925314	0	0.0660939	0	0	0	0	0	0	0	0	0.460829	0.132188	0.396563	0.396563	0	0.566572	1.02041	1.23916	0	0.738007	0.60241	1.14286	217	1513	0.76798	0.896824	KLn	GAIN.LOSS	CDS	min25k.min10pr
HI_q3__ALL	-0.0949554	0.352141	0.320556	-0.494096	-0.0984936	0.428451	0.421986	-0.374702	-0.109357	0.295367	0.274954	-0.56074	-0.0973671	0.365493	0.341789	-0.466242	26.7281	28.883	6.91244	7.60079	2.76498	1.98282	0.921659	0.793126	0	0.396563	3.68664	12.4424	10.5991	3.76735	13.6153	11.5003	31.0924	26.9122	21.4286	30.6072	19.6078	25.5843	28.9157	32.7143	217	1513	0.742113	0.850602	KLn	GAIN.LOSS	CDS	min25k.min10pr
SynKEGG_Serotonergic__ALL	-0.937269	0.367826	0.302849	-0.518773	-0.897828	0.389716	0.328817	-0.483045	-0.947619	0.364939	0.300212	-0.522571	-0.928009	0.373008	0.30908	-0.509929	0.460829	1.18969	0	0	0	0	0	0	0	0	0	0	0.460829	0.0660939	0.528751	0.594845	0	1.13314	1.02041	1.23916	0	1.23001	0.60241	1.14286	217	1513	0.705617	0.850602	KLn	GAIN.LOSS	CDS	min25k.min10pr
HI_q4__ALL	-0.1295	0.270216	0.246246	-0.608631	-0.131615	0.324927	0.317019	-0.498915	-0.150062	0.221013	0.206063	-0.686	-0.136531	0.274544	0.256138	-0.591526	19.8157	24.0582	5.52995	5.94845	1.38249	1.85063	0.921659	0.727032	0.460829	0.264375	3.22581	9.67742	6.91244	3.37079	11.8969	8.79048	21.0084	22.5212	18.3673	25.4027	19.6078	21.6482	19.8795	26.8571	217	1513	0.705617	0.850602	KLn	GAIN.LOSS	CDS	min25k.min10pr
Neurof_KeggSynaptic__ALL	-0.48623	0.296666	0.258464	-0.5876	-0.462882	0.328041	0.297781	-0.526103	-0.495082	0.286229	0.251322	-0.59977	-0.481452	0.303627	0.268189	-0.571559	2.30415	3.1725	0	0.198282	0	0.0660939	0	0.0660939	0	0	0	0.460829	1.84332	0.198282	1.45406	1.52016	0.840336	2.69122	4.08163	3.59356	0	2.33702	3.01205	4.14286	217	1513	0.705617	0.850602	KLn	GAIN.LOSS	CDS	min25k.min10pr
PhMm_Aggr_DigestHepato_all__ALL	-0.230493	0.230223	0.20173	-0.69523	-0.223794	0.270989	0.254973	-0.593507	-0.241946	0.208211	0.18519	-0.732383	-0.230584	0.238372	0.214427	-0.668721	10.5991	13.6814	1.38249	2.44547	0	0.330469	0	0.132188	0	0.0660939	0.460829	4.60829	5.52995	1.91672	5.48579	6.27892	13.4454	10.4816	7.14286	16.4808	13.7255	13.6531	9.63855	13.7143	217	1513	0.705617	0.850602	KLn	GAIN.LOSS	CDS	min25k.min10pr
Neurof_PathwaysAxonG__ALL	-0.665548	0.252512	0.197766	-0.703849	-0.640248	0.27767	0.229914	-0.638435	-0.682693	0.240812	0.189747	-0.721826	-0.658935	0.259503	0.20749	-0.683003	1.38249	2.77594	0	0.396563	0	0.0660939	0	0	0	0	0.460829	0.460829	0.460829	0.594845	1.25578	0.925314	2.52101	1.84136	0	3.59356	1.96078	2.82903	1.20482	2.71429	217	1513	0.705617	0.850602	KLn	GAIN.LOSS	CDS	min25k.min10pr
PhMm_Aggr_HematoImmune_all__ALL	-0.183537	0.19598	0.169429	-0.771012	-0.190357	0.225587	0.212579	-0.67248	-0.197631	0.16859	0.14826	-0.828977	-0.188138	0.199567	0.177491	-0.750824	17.5115	18.7707	2.30415	5.08923	0	1.52016	0	0.594845	0	0.198282	2.30415	5.99078	9.21659	2.115	8.26173	8.39392	17.6471	15.1558	17.3469	21.9331	17.6471	17.7122	17.4699	20	217	1513	0.705617	0.850602	KLn	GAIN.LOSS	CDS	min25k.min10pr
BspanML_lg2rpkm0.93__ALL	-0.156967	0.0720331	0.0553288	-1.25705	-0.203544	0.0531821	0.0471805	-1.32624	-0.171654	0.0534158	0.0417161	-1.3797	-0.169462	0.0655591	0.0520923	-1.28323	30.8756	35.6246	9.21659	13.0866	3.68664	5.08923	1.38249	1.85063	0.460829	1.1236	5.06912	15.2074	10.5991	4.23001	16.5896	14.805	31.9328	32.7195	29.5918	38.166	23.5294	33.5793	33.1325	38	217	1513	0.407074	0.425504	KLn	GAIN.LOSS	CDS	min25k.min10pr
GI_q2__ALL	-0.212288	0.0654701	0.0437053	-1.35947	-0.273111	0.0460189	0.0356687	-1.44771	-0.231332	0.0494938	0.0317876	-1.49774	-0.226877	0.0595718	0.0413942	-1.38306	16.129	25.2479	5.06912	7.20423	2.30415	2.37938	1.38249	1.25578	0.921659	0.793126	4.14747	6.45161	5.52995	2.97422	13.6153	8.65829	15.9664	26.0623	16.3265	24.5353	17.6471	23.9852	15.6627	26.7143	217	1513	0.407074	0.405292	KLn	GAIN.LOSS	CDS	min25k.min10pr
SynKEGG_Dopaminergic__ALL	-14.4291	0.976436	0.0175085	-1.75675	-14.3973	0.976332	0.0199349	-1.70039	-14.4422	0.976513	0.0167962	-1.77479	-14.4228	0.976411	0.0181843	-1.7403	0	1.25578	0	0.132188	0	0	0	0	0	0	0	0	0	0.0660939	0.594845	0.594845	0	0.849858	0	1.6109	0	0.861009	0	1.71429	217	1513	0.338893	0.285535	KLn	GAIN.LOSS	CDS	min25k.min10pr
SynKEGG_Cholinergic__ALL	-14.6077	0.974934	0.00863593	-2.06369	-14.579	0.97486	0.00997144	-2.00124	-14.6197	0.975009	0.00830183	-2.08083	-14.6016	0.974908	0.00895869	-2.04776	0	1.52016	0	0.0660939	0	0	0	0	0	0	0	0	0	0.132188	0.925314	0.462657	0	1.27479	0	1.73482	0	1.10701	0	2	217	1513	0.254272	0.285535	KLn	GAIN.LOSS	CDS	min25k.min10pr
BspanVHM_PreNat__LOSS	0.69836	0.0869669	0.108591	0.964207	0.78053	0.0734015	0.0904469	1.04361	0.721387	0.0780905	0.0990207	1.00427	0.645231	0.121556	0.143038	0.844548	2.8	1.63456	0.4	0	0	0	0	0	0	0	0	0.8	2	0	0.0583771	1.57618	1.47059	1.65816	4.38596	1.61464	5	1.51025	2.10526	1.78117	250	1713	0.771273	0.851175	KLy	LOSS	In.Transcript.Hit.CDS	min10k.min00pr
HI_q2__LOSS	0.4214	0.144033	0.157938	0.801513	0.57819	0.0931725	0.0992964	1.00307	0.448309	0.122683	0.136155	0.865967	0.410172	0.160766	0.174002	0.759445	6.8	3.91127	0	0	0	0	0	0	0	0	0	0.8	6	0	0.583771	3.3275	9.55882	4.46429	3.50877	3.44456	5	3.12837	7.36842	4.83461	250	1713	0.771273	0.851175	KLy	LOSS	In.Transcript.Hit.CDS	min10k.min00pr
Neurof_UnionInclusive__LOSS	0.520605	0.11873	0.135917	0.866726	0.628003	0.0911963	0.102371	0.989824	0.542168	0.106012	0.122752	0.91097	0.496773	0.141707	0.158413	0.800209	4.4	2.68535	0.4	0	0	0	0	0	0	0	0	1.6	2.8	0	0.40864	2.27671	5.14706	2.93367	3.50877	2.47578	5	2.48112	4.21053	2.92621	250	1713	0.771273	0.851175	KLy	LOSS	In.Transcript.Hit.CDS	min10k.min00pr
HI_q3__LOSS	0.363137	0.183974	0.198228	0.702835	0.514818	0.120526	0.126676	0.897306	0.384804	0.161454	0.175577	0.755533	0.340435	0.221759	0.234739	0.629415	7.2	4.72855	0	0.0583771	0	0	0	0	0	0	0	2.4	4.8	0	0.992411	3.73614	7.35294	5.48469	7.01754	4.09042	6.66667	4.53074	7.36842	4.96183	250	1713	0.771273	0.851175	KLy	LOSS	In.Transcript.Hit.CDS	min10k.min00pr
BspanHM_lg2rpkm3.21__LOSS	0.331075	0.211991	0.226915	0.644137	0.491714	0.136108	0.14214	0.847285	0.355189	0.183243	0.198206	0.702884	0.305082	0.259532	0.272674	0.564356	6.8	4.43666	0.4	0.175131	0	0	0	0	0	0	0	1.6	5.2	0.0583771	0.40864	3.96964	6.61765	3.69898	7.01754	5.0592	6.66667	3.34412	6.84211	5.72519	250	1713	0.771273	0.851175	KLy	LOSS	In.Transcript.Hit.CDS	min10k.min00pr
BspanVHM_PstNat__LOSS	0.488223	0.192796	0.213229	0.671155	0.575072	0.16162	0.177169	0.751613	0.508166	0.176111	0.196671	0.70626	0.443186	0.24433	0.262969	0.580096	3.6	1.75131	0	0.116754	0	0	0	0	0	0	0	0.8	2.8	0	0.116754	1.63456	3.67647	1.78571	3.50877	1.72228	3.33333	1.2945	3.68421	2.29008	250	1713	0.771273	0.851175	KLy	LOSS	In.Transcript.Hit.CDS	min10k.min00pr
PSD_BayesGrant_fullset__LOSS	0.63676	0.188744	0.212101	0.673456	0.698772	0.171048	0.191297	0.718291	0.65183	0.180225	0.203399	0.691652	0.595718	0.222698	0.244439	0.611829	2.4	1.22592	0	0	0	0	0	0	0	0	0	0.8	1.6	0	0.175131	1.05079	2.20588	1.27551	2.63158	1.18407	3.33333	1.07875	2.10526	1.39949	250	1713	0.771273	0.851175	KLy	LOSS	In.Transcript.Hit.CDS	min10k.min00pr
Kirov_ARC__LOSS	2.08306	0.176684	0.19747	0.704498	2.09544	0.175434	0.196042	0.707652	2.09674	0.173096	0.194291	0.711547	2.03509	0.188988	0.208654	0.680574	0.4	0.0583771	0	0	0	0	0	0	0	0	0	0	0.4	0	0	0.0583771	0.735294	0	0	0.107643	0	0.107875	0.526316	0	250	1713	0.771273	0.851175	KLy	LOSS	In.Transcript.Hit.CDS	min10k.min00pr
Neurof_GoNervTransm__LOSS	0.752498	0.18932	0.213364	0.670879	0.796927	0.17831	0.200384	0.698138	0.769544	0.179294	0.204282	0.68977	0.710351	0.216887	0.240636	0.618639	1.2	0.525394	0.4	0	0	0	0	0	0	0	0	0.8	0.4	0	0	0.525394	1.47059	0.382653	0.877193	0.645856	0	0.323625	1.57895	0.763359	250	1713	0.771273	0.851175	KLy	LOSS	In.Transcript.Hit.CDS	min10k.min00pr
BspanVH_lg2rpkm4.74__LOSS	0.488861	0.26934	0.289519	0.538323	0.555869	0.24131	0.258483	0.587567	0.506882	0.253313	0.27388	0.562439	0.430776	0.337625	0.354421	0.450481	2.8	1.57618	0	0	0	0	0	0	0	0	0	0.8	2	0	0.233508	1.34267	1.47059	2.55102	4.38596	0.753498	1.66667	1.51025	3.15789	1.65394	250	1713	0.923155	0.978145	KLy	LOSS	In.Transcript.Hit.CDS	min10k.min00pr
BspanLA_lg2rpkm.MIN__LOSS	0.242593	0.388591	0.399444	0.398544	0.347196	0.306974	0.312801	0.504732	0.258705	0.359501	0.371103	0.430506	0.217153	0.44647	0.455149	0.341847	6.4	4.31991	0	0.116754	0	0	0	0	0	0	0	0.4	6	0	0.350263	3.96964	8.08824	4.33673	4.38596	4.30571	3.33333	3.77562	7.36842	4.96183	250	1713	0.984882	0.984283	KLy	LOSS	In.Transcript.Hit.CDS	min10k.min00pr
FMR1_Targets_Darnell__LOSS	0.590967	0.320126	0.342993	0.464715	0.642337	0.301526	0.32243	0.491565	0.653733	0.276763	0.300852	0.521647	0.569125	0.345861	0.366298	0.436166	1.6	0.758903	0	0	0	0	0	0	0	0	0	0.4	1.2	0	0.175131	0.583771	2.20588	1.27551	0.877193	0.322928	0	0.755124	2.10526	0.763359	250	1713	0.984882	0.984283	KLy	LOSS	In.Transcript.Hit.CDS	min10k.min00pr
Neurof_GoNeuronProj__LOSS	0.505778	0.380176	0.402314	0.395435	0.544885	0.363443	0.384074	0.415585	0.519597	0.368431	0.391096	0.407717	0.457593	0.430175	0.448919	0.347832	1.6	1.05079	0	0	0	0	0	0	0	0	0	0.8	0.8	0	0.0583771	0.992411	1.47059	1.02041	1.75439	1.07643	3.33333	1.07875	1.05263	1.01781	250	1713	0.991831	0.984283	KLy	LOSS	In.Transcript.Hit.CDS	min10k.min00pr
Neurof_GoSynaptic__LOSS	0.556647	0.405774	0.429029	0.367513	0.592757	0.391478	0.413706	0.383308	0.581398	0.386894	0.411139	0.386011	0.527457	0.435871	0.456437	0.340619	1.2	0.700525	0	0	0	0	0	0	0	0	0	0.8	0.4	0	0.0583771	0.642148	1.47059	0.510204	0.877193	0.861141	1.66667	0.647249	1.05263	0.763359	250	1713	0.991831	0.984283	KLy	LOSS	In.Transcript.Hit.CDS	min10k.min00pr
PhMm_NeuroUnion_all__LOSS	0.190273	0.535038	0.543026	0.26518	0.250857	0.476994	0.48277	0.31626	0.207898	0.499728	0.508748	0.293497	0.15569	0.617866	0.623062	0.205469	4.8	4.02802	0.4	0.0583771	0	0	0	0	0	0	0	1.6	3.2	0.0583771	0.700525	3.26912	7.35294	3.31633	1.75439	4.62863	3.33333	3.8835	5.26316	4.19847	250	1713	0.991831	0.984283	KLy	LOSS	In.Transcript.Hit.CDS	min10k.min00pr
GI_q1__LOSS	0.110091	0.650397	0.654434	0.184134	0.171857	0.570157	0.572133	0.242503	0.116395	0.632244	0.636678	0.19608	0.0645132	0.794106	0.795467	0.0993779	7.6	6.01284	0.4	0.40864	0	0	0	0	0	0	0	0.4	7.2	0	0.583771	5.42907	10.2941	7.01531	4.38596	5.16685	5	5.50162	8.42105	6.61578	250	1713	0.991831	0.984283	KLy	LOSS	In.Transcript.Hit.CDS	min10k.min00pr
PhHs_NervSys_All__LOSS	0.156479	0.677222	0.682033	0.166195	0.187372	0.64686	0.651187	0.186294	0.17093	0.649798	0.655407	0.183489	0.129079	0.733736	0.736964	0.132554	3.6	2.68535	0	0.0583771	0	0	0	0	0	0	0	0.4	3.2	0	0.583771	2.10158	4.41176	2.29592	2.63158	3.01399	1.66667	2.1575	4.21053	3.30789	250	1713	0.991831	0.984283	KLy	LOSS	In.Transcript.Hit.CDS	min10k.min00pr
Neurof_GoNeuronBody__LOSS	0.490493	0.677702	0.689517	0.161455	0.503513	0.673043	0.684774	0.164453	0.481552	0.683601	0.694944	0.15805	0.376411	0.749737	0.756871	0.120978	0.4	0.175131	0	0	0	0	0	0	0	0	0	0	0.4	0	0	0.175131	0.735294	0.255102	0	0.107643	1.66667	0	0	0.381679	250	1713	0.991831	0.984283	KLy	LOSS	In.Transcript.Hit.CDS	min10k.min00pr
PhMm_NeuroBehav_all__LOSS	0.135787	0.719516	0.723059	0.140826	0.165987	0.688929	0.692107	0.159827	0.148569	0.694781	0.698941	0.155559	0.116281	0.760007	0.762572	0.117719	3.6	2.97723	0	0	0	0	0	0	0	0	0	1.2	2.4	0.0583771	0.583771	2.33508	6.61765	2.55102	0	3.33692	3.33333	2.80475	3.68421	3.18066	250	1713	0.991831	0.984283	KLy	LOSS	In.Transcript.Hit.CDS	min10k.min00pr
GOP_lessthan500g__LOSS	0.0113702	0.943187	0.943264	0.0253666	0.094983	0.818115	0.816711	0.0879315	0.0284393	0.860434	0.86087	0.0650622	-0.0231952	0.889854	0.889604	-0.0508034	15.6	14.8862	2.4	1.34267	0	0.175131	0	0	0	0	0	2.8	12.8	0.0583771	2.33508	12.4927	16.9118	16.3265	14.0351	13.6706	11.6667	13.9159	16.8421	16.0305	250	1713	0.991831	0.984283	KLy	LOSS	In.Transcript.Hit.CDS	min10k.min00pr
Neurof_GoNervSysDev_CNS__LOSS	0.0927027	0.868759	0.869978	0.0604916	0.100971	0.861135	0.862377	0.0643029	0.112703	0.841076	0.842849	0.0742502	0.0581959	0.917671	0.918145	0.0370885	1.6	1.2843	0	0	0	0	0	0	0	0	0	0.4	1.2	0	0.350263	0.934034	1.47059	1.65816	1.75439	0.968784	0	1.18662	2.10526	1.39949	250	1713	0.991831	0.984283	KLy	LOSS	In.Transcript.Hit.CDS	min10k.min00pr
PhMm_Aggr_EndoExocrRepr_all__LOSS	0.0538508	0.90206	0.902702	0.0444556	0.0658682	0.888492	0.889156	0.0510223	0.0779379	0.858972	0.860286	0.0653572	0.0349266	0.936805	0.937068	0.0282291	2.4	1.92644	0	0.116754	0	0	0	0	0	0	0	0	2.4	0	0.233508	1.69294	2.94118	2.29592	1.75439	1.61464	1.66667	1.726	2.63158	2.16285	250	1713	0.991831	0.984283	KLy	LOSS	In.Transcript.Hit.CDS	min10k.min00pr
PhMm_Aggr_SkeCranioLimbs_all__LOSS	0.0180389	0.968431	0.96849	0.0139047	0.0230935	0.961455	0.96153	0.017037	0.030845	0.946098	0.94627	0.0239849	0.000438702	0.999235	0.999235	0.000332425	2.4	2.21833	0	0	0	0	0	0	0	0	0	0.4	2	0	0.467017	1.75131	3.67647	2.29592	0.877193	2.15285	1.66667	2.1575	2.63158	2.29008	250	1713	0.991831	0.984283	KLy	LOSS	In.Transcript.Hit.CDS	min10k.min00pr
Neurof_GoNervSysDev__LOSS	0.00636801	0.988856	0.988863	0.0048638	0.0106035	0.982408	0.982423	0.00770136	0.0199427	0.965165	0.965236	0.0153664	-0.0319109	0.944499	0.944321	-0.0248806	2.4	2.10158	0	0	0	0	0	0	0	0	0	0.8	1.6	0	0.350263	1.75131	2.20588	2.29592	2.63158	1.93757	0	1.83387	3.15789	2.4173	250	1713	0.991831	0.984283	KLy	LOSS	In.Transcript.Hit.CDS	min10k.min00pr
GI_q4__LOSS	0.000516692	0.998465	0.998465	0.00066699	0.00546742	0.986503	0.986506	0.00590016	0.0164843	0.951289	0.951374	0.0216489	-0.0420381	0.877859	0.877369	-0.0568178	6.8	6.01284	0	0.175131	0	0	0	0	0	0	0	2	4.8	0.0583771	1.22592	4.72855	6.61765	6.12245	7.01754	5.92034	5	5.17799	7.36842	6.99746	250	1713	0.991831	0.984283	KLy	LOSS	In.Transcript.Hit.CDS	min10k.min00pr
BspanVHM_EqlNat__LOSS	7.74503e-05	0.99984	0.99984	6.94343e-05	0.00435573	0.991829	0.991831	0.00356218	0.0191399	0.960607	0.960689	0.0174173	-0.0133156	0.972641	0.972602	-0.0120647	3.2	2.62697	0	0.0583771	0	0	0	0	0	0	0	0.8	2.4	0.0583771	0.467017	2.10158	2.94118	2.67857	3.50877	2.58342	0	2.04962	4.21053	3.30789	250	1713	0.991831	0.984283	KLy	LOSS	In.Transcript.Hit.CDS	min10k.min00pr
Neurof_UnionStringent__LOSS	-0.0290482	0.963531	0.963413	-0.0161874	-0.0273083	0.966979	0.966893	-0.0146214	-0.0194555	0.975598	0.975546	-0.0107523	-0.0998374	0.875956	0.874631	-0.0581749	1.2	1.22592	0	0	0	0	0	0	0	0	0	0.8	0.4	0	0.0583771	1.16754	1.47059	1.14796	0.877193	1.29171	1.66667	1.18662	1.05263	1.27226	250	1713	0.991831	0.984283	KLy	LOSS	In.Transcript.Hit.CDS	min10k.min00pr
FMR1_Targets_Ascano__LOSS	-0.0397351	0.959373	0.959196	-0.0180925	-0.037842	0.96236	0.96222	-0.0167255	-0.0153577	0.984309	0.984283	-0.00687989	-0.0159867	0.983757	0.983729	-0.0071245	0.8	0.758903	0	0	0	0	0	0	0	0	0	0	0.8	0	0.175131	0.583771	0.735294	1.02041	0.877193	0.538213	0	0.755124	1.05263	0.763359	250	1713	0.991831	0.984283	KLy	LOSS	In.Transcript.Hit.CDS	min10k.min00pr
GI_q3__LOSS	-0.018683	0.957961	0.957849	-0.018703	-0.018864	0.961673	0.961607	-0.0170022	0.0148627	0.966902	0.966971	0.0145867	-0.0288914	0.935897	0.935642	-0.0288904	2	3.03561	1.2	0.175131	0	0	0	0	0	0	0	0.4	1.6	0	0.40864	2.62697	2.20588	3.18878	1.75439	2.90635	1.66667	3.12837	2.10526	2.92621	250	1713	0.991831	0.984283	KLy	LOSS	In.Transcript.Hit.CDS	min10k.min00pr
PhMm_NervSystem_all__LOSS	-0.0507711	0.892977	0.892321	-0.0494787	-0.0563651	0.890716	0.890213	-0.0505061	-0.0330573	0.930439	0.930166	-0.0314394	-0.0982916	0.797269	0.795059	-0.0996004	2.8	2.97723	0.4	0.0583771	0	0	0	0	0	0	0	1.2	1.6	0.0583771	0.583771	2.33508	3.67647	2.67857	1.75439	3.22928	0	2.69687	3.68421	3.30789	250	1713	0.991831	0.984283	KLy	LOSS	In.Transcript.Hit.CDS	min10k.min00pr
PhMm_Aggr_IntegAdipPigm_all__LOSS	-0.0711169	0.875844	0.874931	-0.0580261	-0.0777348	0.873314	0.872557	-0.0592061	-0.0574465	0.899695	0.899102	-0.046191	-0.125319	0.784792	0.782141	-0.106715	2.4	2.10158	0	0	0	0	0	0	0	0	0	0.4	2	0.0583771	0.40864	1.63456	3.67647	1.78571	0.877193	2.36814	0	1.51025	3.15789	2.79898	250	1713	0.991831	0.984283	KLy	LOSS	In.Transcript.Hit.CDS	min10k.min00pr
PhMm_Aggr_HematoImmune_all__LOSS	-0.113091	0.80306	0.800741	-0.0965079	-0.12189	0.798024	0.795968	-0.0991044	-0.110171	0.808123	0.805925	-0.0937051	-0.162707	0.720786	0.716239	-0.144942	2.4	2.21833	0	0	0	0	0	0	0	0	0	0	2.4	0	0.291886	1.92644	2.94118	2.42347	1.75439	2.04521	0	1.726	3.15789	2.79898	250	1713	0.991831	0.984283	KLy	LOSS	In.Transcript.Hit.CDS	min10k.min00pr
SynKEGG_Cholinergic__LOSS	-9.65087	0.976292	0.745347	-0.127642	-9.64896	0.976296	0.745621	-0.127482	-9.6713	0.976241	0.742894	-0.129073	-9.65331	0.976286	0.745065	-0.127806	0	0.0583771	0	0	0	0	0	0	0	0	0	0	0	0	0	0.0583771	0	0	0	0.107643	0	0.107875	0	0	250	1713	0.991831	0.984283	KLy	LOSS	In.Transcript.Hit.CDS	min10k.min00pr
SynKEGG_Glutamatergic__LOSS	-9.65087	0.976292	0.745347	-0.127642	-9.64896	0.976296	0.745621	-0.127482	-9.6713	0.976241	0.742894	-0.129073	-9.65331	0.976286	0.745065	-0.127806	0	0.0583771	0	0	0	0	0	0	0	0	0	0	0	0	0	0.0583771	0	0	0	0.107643	0	0.107875	0	0	250	1713	0.991831	0.984283	KLy	LOSS	In.Transcript.Hit.CDS	min10k.min00pr
Kirov_NMDAR__LOSS	-9.65087	0.976292	0.745347	-0.127642	-9.64896	0.976296	0.745621	-0.127482	-9.64701	0.976301	0.745808	-0.127373	-9.68003	0.97622	0.74184	-0.12969	0	0.0583771	0	0	0	0	0	0	0	0	0	0	0	0	0	0.0583771	0	0	0	0.107643	0	0.107875	0	0	250	1713	0.991831	0.984283	KLy	LOSS	In.Transcript.Hit.CDS	min10k.min00pr
PhMm_Aggr_Sensory_all__LOSS	-0.198779	0.685286	0.678609	-0.16838	-0.220954	0.670723	0.664731	-0.177354	-0.188521	0.700997	0.694977	-0.15803	-0.25359	0.60796	0.598023	-0.223282	2	2.10158	0	0	0	0	0	0	0	0	0	0	2	0	0.233508	1.86807	2.94118	2.16837	0.877193	2.04521	0	1.726	2.63158	2.54453	250	1713	0.991831	0.984283	KLy	LOSS	In.Transcript.Hit.CDS	min10k.min00pr
SynKEGG_Serotonergic__LOSS	-10.6521	0.977554	0.645908	-0.18983	-10.6509	0.977556	0.646214	-0.189624	-10.667	0.977522	0.643504	-0.191449	-10.6513	0.977555	0.646033	-0.189745	0	0.116754	0	0	0	0	0	0	0	0	0	0	0	0	0	0.116754	0	0	0	0.215285	0	0.21575	0	0	250	1713	0.991831	0.984283	KLy	LOSS	In.Transcript.Hit.CDS	min10k.min00pr
SynKEGG_Dopaminergic__LOSS	-10.839	0.977097	0.614068	-0.211783	-10.8381	0.977098	0.614365	-0.211573	-10.8304	0.977125	0.61566	-0.210659	-11.0832	0.976371	0.568583	-0.245206	0	0.116754	0	0	0	0	0	0	0	0	0	0	0	0	0	0.116754	0	0.127551	0	0.107643	0	0.21575	0	0	250	1713	0.991831	0.984283	KLy	LOSS	In.Transcript.Hit.CDS	min10k.min00pr
PhHs_MindFun_ADX__LOSS	-10.839	0.977097	0.614068	-0.211783	-10.8381	0.977098	0.614365	-0.211573	-10.8431	0.977083	0.613313	-0.212318	-10.938	0.976837	0.596285	-0.224546	0	0.116754	0	0	0	0	0	0	0	0	0	0	0	0	0	0.116754	0	0.127551	0	0.107643	0	0.21575	0	0	250	1713	0.991831	0.984283	KLy	LOSS	In.Transcript.Hit.CDS	min10k.min00pr
GI_q2__LOSS	-0.253031	0.631885	0.62039	-0.207335	-0.275222	0.618092	0.607446	-0.216492	-0.250266	0.635555	0.62428	-0.20462	-0.345805	0.516349	0.497626	-0.303097	1.6	1.86807	0	0.0583771	0	0	0	0	0	0	0	0	1.6	0	0.175131	1.69294	1.47059	1.78571	1.75439	1.93757	3.33333	1.51025	1.05263	2.29008	250	1713	0.991831	0.984283	KLy	LOSS	In.Transcript.Hit.CDS	min10k.min00pr
PhHs_MindFun_All__LOSS	-0.361982	0.627671	0.610422	-0.21437	-0.373229	0.622861	0.6062	-0.217384	-0.351629	0.637542	0.621154	-0.2068	-0.410661	0.583701	0.56266	-0.249754	0.8	1.16754	0	0.0583771	0	0	0	0	0	0	0	0	0.8	0	0.175131	0.992411	0.735294	0.765306	0.877193	1.507	0	1.18662	1.05263	1.14504	250	1713	0.991831	0.984283	KLy	LOSS	In.Transcript.Hit.CDS	min10k.min00pr
PhMm_CompleteLethality__LOSS	-0.550169	0.603244	0.576376	-0.239294	-0.561874	0.599607	0.57334	-0.241588	-0.541072	0.609393	0.583349	-0.234071	-0.596854	0.573956	0.543558	-0.264754	0.4	0.642148	0	0	0	0	0	0	0	0	0	0	0.4	0	0.0583771	0.583771	0.735294	0.510204	0	0.753498	1.66667	0.431499	0	0.890585	250	1713	0.991831	0.984283	KLy	LOSS	In.Transcript.Hit.CDS	min10k.min00pr
Neurof_KeggSynaptic__LOSS	-10.7802	0.972109	0.548506	-0.260818	-10.7801	0.972109	0.548771	-0.260609	-10.777	0.972129	0.549235	-0.260242	-10.9539	0.97141	0.511808	-0.290893	0	0.175131	0	0	0	0	0	0	0	0	0	0	0	0	0	0.175131	0	0.127551	0	0.215285	0	0.323625	0	0	250	1713	0.991831	0.984283	KLy	LOSS	In.Transcript.Hit.CDS	min10k.min00pr
PhMm_Aggr_DigestHepato_all__LOSS	-0.289929	0.516429	0.497496	-0.303211	-0.320704	0.494126	0.476862	-0.321607	-0.283075	0.526733	0.508541	-0.293674	-0.305273	0.494498	0.474223	-0.324017	1.6	2.33508	0.4	0.175131	0	0	0	0	0	0	0	0	1.6	0	0.233508	2.10158	2.20588	2.67857	0.877193	2.04521	0	2.26537	2.10526	2.4173	250	1713	0.991831	0.984283	KLy	LOSS	In.Transcript.Hit.CDS	min10k.min00pr
PhHs_NervSys_ADX__LOSS	-0.748735	0.476994	0.431539	-0.36498	-0.76123	0.472995	0.428286	-0.368267	-0.751543	0.475257	0.429506	-0.367031	-0.823418	0.434952	0.383532	-0.416198	0.4	0.700525	0	0	0	0	0	0	0	0	0	0	0.4	0	0	0.700525	0	0.510204	0.877193	0.861141	0	0.431499	0.526316	1.01781	250	1713	0.991831	0.984283	KLy	LOSS	In.Transcript.Hit.CDS	min10k.min00pr
PhMm_Aggr_CardvascMuscle_all__LOSS	-0.331584	0.39363	0.376201	-0.42458	-0.395179	0.349182	0.33486	-0.475137	-0.321094	0.409296	0.392664	-0.405979	-0.377168	0.335998	0.316532	-0.499582	3.2	3.67776	0	0	0	0	0	0	0	0	0	0.4	2.8	0	0.875657	2.8021	5.14706	3.69898	0.877193	3.65985	0	2.91262	4.21053	4.58015	250	1713	0.984882	0.984283	KLy	LOSS	In.Transcript.Hit.CDS	min10k.min00pr
Neurof_PathwaysAxonG__LOSS	-12.4204	0.968896	0.201461	-0.695808	-12.4329	0.968874	0.200531	-0.697819	-12.4173	0.968848	0.201807	-0.695064	-12.4553	0.968802	0.194374	-0.711361	0	0.40864	0	0	0	0	0	0	0	0	0	0	0	0	0	0.40864	0	0.510204	0	0.322928	0	0.539374	0	0.254453	250	1713	0.771273	0.851175	KLy	LOSS	In.Transcript.Hit.CDS	min10k.min00pr
HI_q1__LOSS	-0.524787	0.263529	0.229809	-0.638632	-0.61621	0.219704	0.192224	-0.716191	-0.50932	0.278474	0.24563	-0.609718	-0.570143	0.22533	0.191007	-0.71895	2	3.21074	0	0.0583771	0	0	0	0	0	0	0	0	2	0	0.233508	2.97723	2.20588	3.06122	1.75439	3.33692	1.66667	3.0205	2.10526	3.43511	250	1713	0.771273	0.944731	KLy	LOSS	In.Transcript.Hit.CDS	min10k.min00pr
HI_q4__LOSS	-0.529747	0.182622	0.152151	-0.817725	-0.670029	0.127546	0.106063	-0.974435	-0.523838	0.187664	0.157265	-0.803367	-0.618831	0.125246	0.0968494	-1.0139	2.8	4.26153	0	0.116754	0	0	0	0	0	0	0	0	2.8	0.0583771	0.467017	3.73614	1.47059	3.95408	4.38596	4.52099	1.66667	3.66775	3.15789	4.96183	250	1713	0.771273	0.851175	KLy	LOSS	In.Transcript.Hit.CDS	min10k.min00pr
BspanML_lg2rpkm0.93__LOSS	-0.580769	0.0613856	0.0437811	-1.35871	-0.83463	0.0201604	0.0144942	-1.83881	-0.569486	0.0672663	0.0491755	-1.30825	-0.633067	0.0439929	0.0296583	-1.52785	4.8	7.6474	0	0.350263	0	0.0583771	0	0	0	0	0	0.8	4	0.0583771	1.51781	6.07122	7.35294	8.54592	1.75439	6.88913	3.33333	7.22762	5.26316	8.14249	250	1713	0.724708	0.851175	KLy	LOSS	In.Transcript.Hit.CDS	min10k.min00pr
SynKEGG_GABAergic__LOSS	NA	NA	NA	NA	NA	NA	NA	NA	NA	NA	NA	NA	NA	NA	NA	NA	0	0	0	0	0	0	0	0	0	0	0	0	0	0	0	0	0	0	0	0	0	0	0	0	250	1713	NA	NA	KLy	LOSS	In.Transcript.Hit.CDS	min10k.min00pr
Neurof_GoNervTransm__GAIN	1.69948	0.00843801	0.0179814	1.74518	2.10492	0.00299009	0.00683939	2.16498	1.64398	0.011263	0.0220468	1.65665	1.77144	0.00672934	0.0149335	1.82584	1.6	0.467017	0	0	0	0	0	0	0	0	0	0	1.6	0	0	0.467017	1.47059	0.510204	1.75439	0.430571	1.66667	0.862999	1.57895	0	250	1713	0.249213	0.460476	KLy	GAIN	In.Transcript.Hit.CDS	min10k.min00pr
Neurof_UnionInclusive__GAIN	0.624582	0.0641293	0.0896609	1.0474	1.2629	0.00849861	0.00996852	2.00137	0.571655	0.0932868	0.120995	0.917232	0.717795	0.0406641	0.0609364	1.21512	3.6	2.10158	0	0.233508	0	0.0583771	0	0	0	0	0	0.4	3.2	0	0.758903	1.34267	2.94118	2.16837	4.38596	2.04521	6.66667	3.0205	2.63158	1.01781	250	1713	0.249213	0.75622	KLy	GAIN	In.Transcript.Hit.CDS	min10k.min00pr
Kirov_ARC__GAIN	2.65114	0.0349739	0.0316932	1.49903	2.89751	0.0233767	0.0215938	1.66567	2.59211	0.0410252	0.0368381	1.4337	2.70451	0.0323178	0.0293097	1.53299	0.8	0.0583771	0	0	0	0	0	0	0	0	0	0	0.8	0	0	0.0583771	0	0.127551	1.75439	0	0	0.107875	1.05263	0	250	1713	0.269922	0.460476	KLy	GAIN	In.Transcript.Hit.CDS	min10k.min00pr
Kirov_NMDAR__GAIN	2.65114	0.0349739	0.0316932	1.49903	2.89751	0.0233767	0.0215938	1.66567	2.59211	0.0410252	0.0368381	1.4337	2.70451	0.0323178	0.0293097	1.53299	0.8	0.0583771	0	0	0	0	0	0	0	0	0	0	0.8	0	0	0.0583771	0	0.127551	1.75439	0	0	0.107875	1.05263	0	250	1713	0.269922	0.460476	KLy	GAIN	In.Transcript.Hit.CDS	min10k.min00pr
Neurof_GoSynaptic__GAIN	1.13687	0.0461554	0.0707198	1.15046	1.50285	0.0178686	0.030013	1.52269	1.10914	0.0523181	0.0777738	1.10917	1.21543	0.0350029	0.0571666	1.24286	1.6	0.525394	0	0.0583771	0	0	0	0	0	0	0	0	1.6	0	0.175131	0.350263	0.735294	0.510204	2.63158	0.538213	0	0.862999	2.10526	0.127226	250	1713	0.277357	0.601256	KLy	GAIN	In.Transcript.Hit.CDS	min10k.min00pr
Neurof_KeggSynaptic__GAIN	1.81059	0.0624633	0.0870874	1.06004	2.10353	0.0383632	0.057105	1.24333	1.82617	0.0595316	0.0841759	1.07481	1.92251	0.0504457	0.0730167	1.13658	0.8	0.175131	0	0	0	0	0	0	0	0	0	0	0.8	0	0	0.175131	0	0.255102	1.75439	0.107643	1.66667	0.21575	0.526316	0.127226	250	1713	0.407893	0.601256	KLy	GAIN	In.Transcript.Hit.CDS	min10k.min00pr
Neurof_GoNeuronProj__GAIN	0.698693	0.160453	0.192353	0.7159	1.08364	0.0604413	0.0775927	1.11018	0.641702	0.196311	0.22644	0.645047	0.814699	0.113411	0.142461	0.846304	2	1.16754	0	0.0583771	0	0	0	0	0	0	0	0	2	0	0.291886	0.875657	0.735294	1.14796	3.50877	1.18407	0	1.726	2.63158	0.508906	250	1713	0.484954	0.919543	KLy	GAIN	In.Transcript.Hit.CDS	min10k.min00pr
SynKEGG_Glutamatergic__GAIN	2.26489	0.130053	0.156565	0.805307	2.59764	0.0967258	0.119268	0.923477	2.27379	0.125878	0.153324	0.81439	2.35261	0.120748	0.146155	0.835187	0.4	0.0583771	0	0	0	0	0	0	0	0	0	0	0.4	0	0	0.0583771	0	0	0.877193	0.107643	0	0.107875	0.526316	0	250	1713	0.596338	0.817508	KLy	GAIN	In.Transcript.Hit.CDS	min10k.min00pr
PhMm_Aggr_DigestHepato_all__GAIN	0.732083	0.266405	0.300993	0.521444	1.04438	0.145069	0.176382	0.753545	0.70046	0.288881	0.321771	0.492453	0.847417	0.203671	0.240735	0.618461	1.2	0.875657	0	0	0	0	0	0	0	0	0	0	1.2	0	0.116754	0.758903	0.735294	0.510204	1.75439	1.18407	3.33333	1.18662	0.526316	0.508906	250	1713	0.721954	0.992551	KLy	GAIN	In.Transcript.Hit.CDS	min10k.min00pr
PhHs_NervSys_ADX__GAIN	0.913808	0.201691	0.255928	0.591882	1.14599	0.128021	0.179272	0.746487	0.833498	0.246511	0.293632	0.532196	1.00794	0.168544	0.224659	0.648475	0.8	0.467017	0	0.0583771	0	0	0	0	0	0	0	0	0.8	0	0	0.467017	0.735294	0.255102	0.877193	0.645856	3.33333	0.755124	0	0.127226	250	1713	0.721954	0.978774	KLy	GAIN	In.Transcript.Hit.CDS	min10k.min00pr
HI_q2__GAIN	0.339908	0.430047	0.448313	0.348419	0.715879	0.17344	0.187708	0.726517	0.335819	0.435066	0.453187	0.343722	0.399513	0.358394	0.380079	0.420126	2.4	1.98482	0	0.116754	0	0	0	0	0	0	0	0.4	2	0	0.291886	1.69294	2.94118	1.78571	1.75439	2.15285	5	2.589	1.57895	1.27226	250	1713	0.721954	0.992551	KLy	GAIN	In.Transcript.Hit.CDS	min10k.min00pr
Neurof_UnionStringent__GAIN	0.407173	0.452779	0.474438	0.323821	0.706207	0.246715	0.271399	0.566391	0.352083	0.514019	0.531364	0.274608	0.49905	0.369926	0.395403	0.40296	1.6	1.2843	0	0.0583771	0	0	0	0	0	0	0	0	1.6	0	0.350263	0.934034	0.735294	1.14796	2.63158	1.39935	0	1.83387	2.10526	0.636132	250	1713	0.904664	0.992551	KLy	GAIN	In.Transcript.Hit.CDS	min10k.min00pr
FMR1_Targets_Darnell__GAIN	0.391208	0.477325	0.508955	0.293321	0.646238	0.286672	0.327547	0.484727	0.381549	0.488955	0.519368	0.284525	0.469633	0.39775	0.437292	0.359229	1.2	0.700525	0	0.0583771	0	0.0583771	0	0	0	0	0	0	1.2	0	0.116754	0.583771	0	1.02041	2.63158	0.430571	0	0.862999	1.57895	0.508906	250	1713	0.959047	0.992551	KLy	GAIN	In.Transcript.Hit.CDS	min10k.min00pr
PhMm_NeuroBehav_all__GAIN	0.263218	0.62521	0.636261	0.196364	0.531718	0.377956	0.397194	0.400998	0.210398	0.694742	0.702165	0.153561	0.325276	0.553222	0.567758	0.245837	1.6	1.57618	0	0.0583771	0	0	0	0	0	0	0	0	1.6	0	0.642148	0.934034	0.735294	1.65816	2.63158	1.507	3.33333	2.1575	1.05263	0.890585	250	1713	0.959047	0.992551	KLy	GAIN	In.Transcript.Hit.CDS	min10k.min00pr
PhMm_NeuroUnion_all__GAIN	0.143904	0.750991	0.756671	0.121093	0.427695	0.424395	0.439987	0.35656	0.0959015	0.833041	0.8356	0.0780017	0.208975	0.652051	0.662246	0.178981	2	2.21833	0	0.116754	0	0.0583771	0	0	0	0	0	0.4	1.6	0	0.642148	1.57618	1.47059	2.42347	2.63158	2.04521	5	3.12837	1.05263	1.14504	250	1713	0.959047	0.992551	KLy	GAIN	In.Transcript.Hit.CDS	min10k.min00pr
PSD_BayesGrant_fullset__GAIN	0.243571	0.665065	0.679248	0.167972	0.486885	0.431784	0.460343	0.336919	0.223981	0.691655	0.703753	0.15258	0.307083	0.589687	0.609959	0.214699	1.2	1.05079	0	0.0583771	0	0.0583771	0	0	0	0	0	0	1.2	0	0.175131	0.875657	0	1.14796	2.63158	0.968784	0	1.51025	1.57895	0.508906	250	1713	0.959047	0.992551	KLy	GAIN	In.Transcript.Hit.CDS	min10k.min00pr
HI_q4__GAIN	0.0315757	0.949689	0.949968	0.022291	0.274153	0.632405	0.641451	0.192837	-0.00469478	0.992557	0.992551	-0.00324699	0.109753	0.829054	0.832076	0.0798369	1.6	2.21833	0	0.116754	0	0.0583771	0	0	0	0	0	0	1.6	0	0.350263	1.86807	0.735294	2.04082	2.63158	2.36814	0	3.55987	2.10526	0.636132	250	1713	0.975818	0.992551	KLy	GAIN	In.Transcript.Hit.CDS	min10k.min00pr
PhMm_Aggr_CardvascMuscle_all__GAIN	0.0671441	0.907338	0.908462	0.0416933	0.290585	0.646647	0.658199	0.181643	0.0412331	0.943242	0.943663	0.025183	0.131048	0.822323	0.826259	0.0828836	1.2	1.45943	0	0.0583771	0	0.0583771	0	0	0	0	0	0	1.2	0	0.525394	0.934034	0.735294	1.53061	1.75439	1.39935	3.33333	2.04962	0.526316	0.763359	250	1713	0.975818	0.992551	KLy	GAIN	In.Transcript.Hit.CDS	min10k.min00pr
BspanVHM_PreNat__GAIN	0.10059	0.874954	0.876303	0.0573457	0.306179	0.655088	0.663003	0.178485	0.0164923	0.979574	0.97961	0.00894698	0.130658	0.839465	0.841622	0.0748832	1.2	1.22592	0	0	0	0	0	0	0	0	0	0	1.2	0	0.233508	0.992411	1.47059	1.40306	0.877193	1.07643	1.66667	1.51025	1.05263	0.890585	250	1713	0.975818	0.992551	KLy	GAIN	In.Transcript.Hit.CDS	min10k.min00pr
PhMm_CompleteLethality__GAIN	0.142408	0.864557	0.86976	0.0606007	0.334984	0.699753	0.721587	0.141711	0.130862	0.875919	0.880305	0.0553667	0.210224	0.802336	0.813081	0.089866	0.4	0.467017	0	0.0583771	0	0.0583771	0	0	0	0	0	0	0.4	0	0.0583771	0.40864	0	0.382653	0.877193	0.538213	1.66667	0.755124	0	0.127226	250	1713	0.975818	0.992551	KLy	GAIN	In.Transcript.Hit.CDS	min10k.min00pr
BspanVH_lg2rpkm4.74__GAIN	-0.019893	0.968862	0.968757	-0.0137852	0.200156	0.729052	0.734011	0.134297	-0.0323271	0.949425	0.949148	-0.0226662	0.0445076	0.931319	0.931804	0.0306756	1.6	1.92644	0	0.116754	0	0.0583771	0	0	0	0	0	0	1.6	0	0.350263	1.57618	0.735294	1.65816	2.63158	2.15285	0	2.589	2.10526	1.14504	250	1713	0.975818	0.992551	KLy	GAIN	In.Transcript.Hit.CDS	min10k.min00pr
PhMm_Aggr_IntegAdipPigm_all__GAIN	0.00829515	0.989455	0.989465	0.00459938	0.221883	0.745012	0.749451	0.125257	-0.037093	0.95295	0.952746	-0.0210228	0.0566656	0.92875	0.929204	0.0318891	1.2	1.57618	0	0	0	0	0	0	0	0	0	0	1.2	0	0.467017	1.10917	0	1.53061	2.63158	1.61464	1.66667	2.1575	1.05263	0.890585	250	1713	0.975818	0.992551	KLy	GAIN	In.Transcript.Hit.CDS	min10k.min00pr
PhHs_NervSys_All__GAIN	0.062846	0.931761	0.932373	0.0304102	0.251524	0.744498	0.751627	0.123998	0.0211994	0.97672	0.976792	0.0101979	0.0936458	0.900233	0.901477	0.0450452	0.8	1.10917	0	0.0583771	0	0	0	0	0	0	0	0	0.8	0	0.350263	0.758903	0.735294	0.892857	0.877193	1.29171	3.33333	1.61812	0	0.508906	250	1713	0.975818	0.992551	KLy	GAIN	In.Transcript.Hit.CDS	min10k.min00pr
Neurof_PathwaysAxonG__GAIN	0.136152	0.902029	0.903468	0.0440871	0.341748	0.764166	0.771672	0.112567	0.119159	0.914147	0.915256	0.0384576	0.17842	0.872432	0.874827	0.0580778	0.4	0.40864	0	0	0	0	0	0	0	0	0	0	0.4	0	0.116754	0.291886	0.735294	0.255102	0	0.538213	0	0.539374	0.526316	0.254453	250	1713	0.975818	0.992551	KLy	GAIN	In.Transcript.Hit.CDS	min10k.min00pr
PhMm_Aggr_Sensory_all__GAIN	0.0590101	0.956543	0.956851	0.0191556	0.29752	0.792107	0.798175	0.0979016	0.0331939	0.975515	0.975614	0.0107222	0.144805	0.894529	0.896283	0.0475549	0.4	0.583771	0	0	0	0	0	0	0	0	0	0.4	0	0	0.0583771	0.525394	0.735294	0.382653	0	0.753498	1.66667	0.862999	0	0.254453	250	1713	0.975818	0.992551	KLy	GAIN	In.Transcript.Hit.CDS	min10k.min00pr
Neurof_GoNervSysDev_CNS__GAIN	-0.0395962	0.9533	0.952906	-0.0209498	0.154051	0.830868	0.83493	0.07835	-0.076623	0.909566	0.908094	-0.0418693	0.0183461	0.978706	0.978784	0.00931294	0.8	0.934034	0	0.116754	0	0.0583771	0	0	0	0	0	0	0.8	0	0.467017	0.467017	1.47059	1.14796	0	0.753498	1.66667	1.2945	0.526316	0.508906	250	1713	0.975818	0.992551	KLy	GAIN	In.Transcript.Hit.CDS	min10k.min00pr
Neurof_GoNervSysDev__GAIN	-0.0864732	0.879407	0.877424	-0.0567904	0.110869	0.859846	0.861734	0.0646267	-0.121168	0.831266	0.827403	-0.0822827	-0.0328709	0.954735	0.95447	-0.0202375	1.2	1.57618	0	0.175131	0	0.0583771	0	0	0	0	0	0.4	0.8	0	0.642148	0.934034	2.20588	1.65816	0	1.507	3.33333	2.1575	0.526316	0.890585	250	1713	0.975818	0.992551	KLy	GAIN	In.Transcript.Hit.CDS	min10k.min00pr
PhMm_NervSystem_all__GAIN	-0.10549	0.854516	0.851697	-0.0697148	0.0837974	0.894371	0.89543	0.0479681	-0.167079	0.772549	0.76579	-0.11589	-0.0586543	0.920244	0.919444	-0.0364747	1.2	1.86807	0	0.116754	0	0.0583771	0	0	0	0	0	0.4	0.8	0	0.642148	1.22592	1.47059	2.04082	0.877193	1.72228	3.33333	2.80475	0.526316	0.763359	250	1713	0.975818	0.992551	KLy	GAIN	In.Transcript.Hit.CDS	min10k.min00pr
BspanVHM_EqlNat__GAIN	-0.114265	0.838437	0.834794	-0.0784207	0.0664117	0.913931	0.914668	0.0387367	-0.157768	0.778657	0.771889	-0.112445	-0.0431745	0.939656	0.939178	-0.0272519	1.2	1.69294	0	0.233508	0	0.0583771	0	0	0	0	0	0	1.2	0	0.350263	1.34267	0	1.91327	2.63158	1.507	0	2.48112	1.57895	0.763359	250	1713	0.975818	0.992551	KLy	GAIN	In.Transcript.Hit.CDS	min10k.min00pr
GI_q1__GAIN	-0.154362	0.735876	0.729385	-0.137043	0.0360269	0.946762	0.9469	0.0236959	-0.144455	0.751901	0.746145	-0.127177	-0.0993653	0.829407	0.82677	-0.0826153	2	2.86048	0	0.175131	0	0.0583771	0	0	0	0	0	0.4	1.6	0	0.467017	2.39346	1.47059	2.80612	2.63158	2.90635	3.33333	3.66775	1.57895	1.9084	250	1713	0.975818	0.992551	KLy	GAIN	In.Transcript.Hit.CDS	min10k.min00pr
HI_q1__GAIN	-0.170051	0.780212	0.775237	-0.110566	0.0204992	0.975551	0.975596	0.0107301	-0.179123	0.767056	0.761374	-0.118402	-0.0959321	0.876421	0.874916	-0.0580337	1.2	1.69294	0	0.0583771	0	0	0	0	0	0	0	0.4	0.8	0	0.0583771	1.63456	0	1.14796	2.63158	2.15285	1.66667	1.94175	1.05263	1.39949	250	1713	0.975818	0.992551	KLy	GAIN	In.Transcript.Hit.CDS	min10k.min00pr
BspanLA_lg2rpkm.MIN__GAIN	-0.206049	0.734198	0.726857	-0.138551	-0.0202135	0.975861	0.975818	-0.0106314	-0.210991	0.728039	0.720359	-0.142451	-0.13661	0.823102	0.819907	-0.0862353	1.2	1.98482	0	0.0583771	0	0	0	0	0	0	0	0.4	0.8	0	0.116754	1.86807	2.20588	1.14796	0	2.69107	1.66667	2.69687	1.05263	1.14504	250	1713	0.975818	0.992551	KLy	GAIN	In.Transcript.Hit.CDS	min10k.min00pr
GI_q4__GAIN	-0.193136	0.637942	0.626194	-0.203291	-0.020132	0.968423	0.968388	-0.0139506	-0.253319	0.540333	0.522088	-0.282256	-0.151694	0.718352	0.71174	-0.147679	2.4	3.50263	0	0.40864	0	0.116754	0	0	0	0	0	0	2.4	0	0.642148	2.86048	1.47059	3.06122	3.50877	3.87513	3.33333	4.63862	2.10526	2.16285	250	1713	0.975818	0.992551	KLy	GAIN	In.Transcript.Hit.CDS	min10k.min00pr
PhMm_Aggr_SkeCranioLimbs_all__GAIN	-0.217519	0.75903	0.749256	-0.12537	-0.0563229	0.940024	0.939534	-0.0270873	-0.23493	0.740865	0.729626	-0.1369	-0.187545	0.793479	0.786554	-0.104271	0.8	1.40105	0	0.0583771	0	0.0583771	0	0	0	0	0	0	0.8	0	0.467017	0.934034	0.735294	1.14796	0.877193	1.61464	3.33333	1.94175	0	0.763359	250	1713	0.975818	0.992551	KLy	GAIN	In.Transcript.Hit.CDS	min10k.min00pr
GOP_lessthan500g__GAIN	-0.197866	0.453148	0.438271	-0.358257	-0.121159	0.860574	0.861862	-0.0645625	-0.227896	0.389014	0.371217	-0.430372	-0.155073	0.570063	0.561668	-0.25052	5.6	8.63981	0.4	1.05079	0	0.233508	0	0	0	0	0	0.8	4.8	0	1.69294	6.94688	4.41176	7.39796	7.01754	9.68784	8.33333	11.0032	4.73684	5.85242	250	1713	0.975818	0.992551	KLy	GAIN	In.Transcript.Hit.CDS	min10k.min00pr
BspanHM_lg2rpkm3.21__GAIN	-0.277939	0.592235	0.576942	-0.238868	-0.124121	0.833017	0.831392	-0.0801942	-0.36106	0.489659	0.46684	-0.330832	-0.237605	0.652711	0.642176	-0.192346	1.6	2.62697	0	0.175131	0	0	0	0	0	0	0	0	1.6	0	0.642148	1.98482	0.735294	2.93367	2.63158	2.36814	1.66667	3.55987	1.57895	1.52672	250	1713	0.975818	0.992551	KLy	GAIN	In.Transcript.Hit.CDS	min10k.min00pr
GI_q2__GAIN	-0.361918	0.633723	0.618415	-0.20872	-0.207644	0.795096	0.791022	-0.101811	-0.397383	0.601087	0.583124	-0.234239	-0.318677	0.676278	0.664422	-0.177556	0.8	1.05079	0	0	0	0	0	0	0	0	0	0	0.8	0	0.0583771	0.992411	0.735294	0.765306	0.877193	1.29171	0	0.862999	1.05263	1.27226	250	1713	0.975818	0.992551	KLy	GAIN	In.Transcript.Hit.CDS	min10k.min00pr
SynKEGG_Serotonergic__GAIN	-10.0054	0.975421	0.699776	-0.155041	-9.85166	0.975799	0.720495	-0.142369	-10.0097	0.97541	0.699182	-0.15541	-9.89308	0.975697	0.714957	-0.14572	0	0.0583771	0	0	0	0	0	0	0	0	0	0	0	0	0	0.0583771	0	0.127551	0	0	0	0.107875	0	0	250	1713	0.975818	0.992551	KLy	GAIN	In.Transcript.Hit.CDS	min10k.min00pr
BspanVHM_PstNat__GAIN	-0.453024	0.528672	0.49769	-0.303041	-0.306772	0.68976	0.678873	-0.168211	-0.473974	0.509096	0.475556	-0.322798	-0.408531	0.573094	0.548177	-0.261079	0.8	1.51781	0	0.175131	0	0	0	0	0	0	0	0	0.8	0	0.40864	1.10917	0	1.27551	1.75439	1.72228	0	1.94175	1.05263	1.01781	250	1713	0.975818	0.992551	KLy	GAIN	In.Transcript.Hit.CDS	min10k.min00pr
SynKEGG_Cholinergic__GAIN	-10.839	0.977097	0.614068	-0.211783	-10.6177	0.977499	0.650521	-0.186738	-10.858	0.977068	0.610947	-0.213997	-10.7098	0.977355	0.635724	-0.196731	0	0.116754	0	0	0	0	0	0	0	0	0	0	0	0	0	0.116754	0	0.127551	0	0.107643	0	0.21575	0	0	250	1713	0.975818	0.992551	KLy	GAIN	In.Transcript.Hit.CDS	min10k.min00pr
SynKEGG_GABAergic__GAIN	-10.839	0.977097	0.614068	-0.211783	-10.6177	0.977499	0.650521	-0.186738	-10.858	0.977068	0.610947	-0.213997	-10.7098	0.977355	0.635724	-0.196731	0	0.116754	0	0	0	0	0	0	0	0	0	0	0	0	0	0.116754	0	0.127551	0	0.107643	0	0.21575	0	0	250	1713	0.975818	0.992551	KLy	GAIN	In.Transcript.Hit.CDS	min10k.min00pr
PhMm_Aggr_EndoExocrRepr_all__GAIN	-0.666184	0.508777	0.452705	-0.344185	-0.513453	0.622779	0.593502	-0.226578	-0.681989	0.498898	0.440961	-0.3556	-0.602282	0.551475	0.505155	-0.296576	0.4	1.10917	0	0.0583771	0	0.0583771	0	0	0	0	0	0	0.4	0	0.291886	0.81728	0.735294	0.765306	0	1.39935	0	1.61812	0.526316	0.508906	250	1713	0.975818	0.992551	KLy	GAIN	In.Transcript.Hit.CDS	min10k.min00pr
SynKEGG_Dopaminergic__GAIN	-11.8022	0.974272	0.417723	-0.379111	-11.6497	0.974618	0.451002	-0.345821	-11.7891	0.974333	0.420836	-0.375887	-11.6986	0.97449	0.439536	-0.357006	0	0.116754	0	0	0	0	0	0	0	0	0	0	0	0	0	0.116754	0	0.255102	0	0	0	0.107875	0	0.127226	250	1713	0.959047	0.992551	KLy	GAIN	In.Transcript.Hit.CDS	min10k.min00pr
PhHs_MindFun_All__GAIN	-12.4339	0.979421	0.396557	-0.401694	-12.2566	0.979633	0.435091	-0.36142	-12.4699	0.97934	0.388572	-0.410528	-12.4167	0.979237	0.397392	-0.400781	0	0.175131	0	0	0	0	0	0	0	0	0	0	0	0	0	0.175131	0	0.127551	0	0.215285	0	0.21575	0	0.127226	250	1713	0.959047	0.992551	KLy	GAIN	In.Transcript.Hit.CDS	min10k.min00pr
[truncated: 1,741 more rows]

## Sheet: Notes
Full name and description of the gene-sets are in Table_S1
All = Gains + losses
